# Supplementary material for: Divergent synthesis of biflavonoids yields novel inhibitors of the aggregation of amyloid β (1–42)
Source: Royal Society of Chemistry journal article supplement (doi:10.1039/c7ob00804j), 2017-01-01

# Electronic Supplementary Information

## Divergent Synthesis of Biflavonoids Yields Novel Inhibitors of the Aggregation of Amyloid $\beta$ (1-42)

Tze Han Sum,<sup>a</sup> Tze Jing Sum,<sup>a</sup> Súil Collins,<sup>a,b</sup> Warren R. J. D. Galloway,<sup>a</sup> David G. Twigg,<sup>a</sup> Florian Hollfelder<sup>b</sup> and David R. Spring<sup>\*a</sup>

<sup>a</sup>Department of Chemistry, University of Cambridge, Lensfield Road, Cambridge, CB2 1EW, UK. Email: spring@ch.cam.ac.uk

<sup>b</sup>Department of Biochemistry, University of Cambridge, 80 Tennis Court Road, Cambridge, CB2 1GA UK.

### Contents:

|                                                                                                |   |
|------------------------------------------------------------------------------------------------|---|
| Table ESI 1: Comments on the behaviour of the library compounds in the ThT assay               | 2 |
| Figure ESI 1 and ESI 2: A $\beta$ <sub>42</sub> aggregation profiles for the library compounds | 7 |
| <sup>1</sup> H NMR and <sup>13</sup> C NMR spectra of compounds                                | 8 |

**Table ESI 1:** Comments on the behaviour of the library compounds in the ThT assay. See manuscript for assay details. See **Figure ESI 1** and **Figure ESI 2** for data.

| Compound                                                                                      | Comments on behaviour in assay |
|-----------------------------------------------------------------------------------------------|--------------------------------|
| 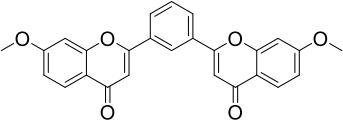 <p>27</p>   | Overly fluorescent             |
|  <p>28</p>   | Inactive/poor activity         |
|  <p>29</p>   | Inactive/poor activity         |
|  <p>30</p>  | Inactive/poor activity         |
|  <p>31</p> | Overly fluorescent             |
|  <p>32</p> | Inactive/poor activity         |
|  <p>33</p> | Moderate activity              |
|  <p>34</p> | Moderate activity              |

Table ESI 1 continued:

| Compound                                                                                      | Comments on behaviour in assay |
|-----------------------------------------------------------------------------------------------|--------------------------------|
| 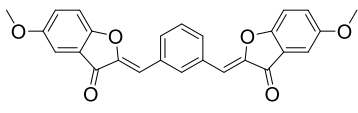 <p>35</p>   | Inactive/poor activity         |
|  <p>36</p>   | Inactive/poor activity         |
|  <p>37</p>   | Sparingly soluble              |
|  <p>38</p>  | Moderate activity              |
|  <p>39</p> | Inactive/poor activity         |
|  <p>40</p> | Inactive/poor activity         |
|  <p>46</p> | Inactive/ poor activity        |

Table ESI 1 continued:

| Compound                                                                                      | Comments on behaviour in assay |
|-----------------------------------------------------------------------------------------------|--------------------------------|
| 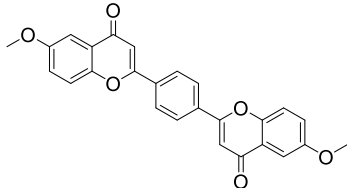 <p>47</p>   | Inactive/poor activity         |
|  <p>48</p>   | Inactive/poor activity         |
|  <p>49</p>  | Overly fluorescent             |
|  <p>50</p> | Inactive/poor activity         |
|  <p>51</p> | Moderate activity              |
|  <p>52</p> | Moderate activity              |

Table ESI 1 continued:

| Compound                                                                                         | Comments on behaviour in assay |
|--------------------------------------------------------------------------------------------------|--------------------------------|
| 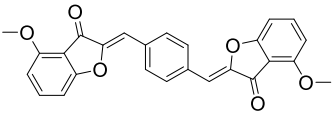<br><b>53</b>   | Inactive/poor activity         |
| <br><b>54</b>   | Sparingly soluble              |
| <br><b>55</b>   | Moderate activity              |
| <br><b>61</b>  | Overly fluorescent             |
| <br><b>62</b> | Inactive/poor activity         |
| <br><b>63</b> | Inactive/poor activity         |

Table ESI 1 continued:

| Compound                                                                                         | Comments on behaviour in assay |
|--------------------------------------------------------------------------------------------------|--------------------------------|
| 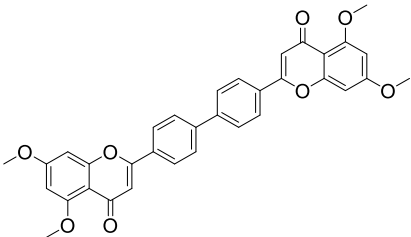<br><b>64</b>   | Overly fluorescent             |
| <br><b>65</b>   | Overly fluorescent             |
| <br><b>66</b>  | Moderate activity              |
| <br><b>67</b> | Moderate activity              |
| <br><b>68</b> | Moderate activity              |
| <br><b>69</b> | Sparingly soluble              |
| <br><b>70</b> | Moderate activity              |

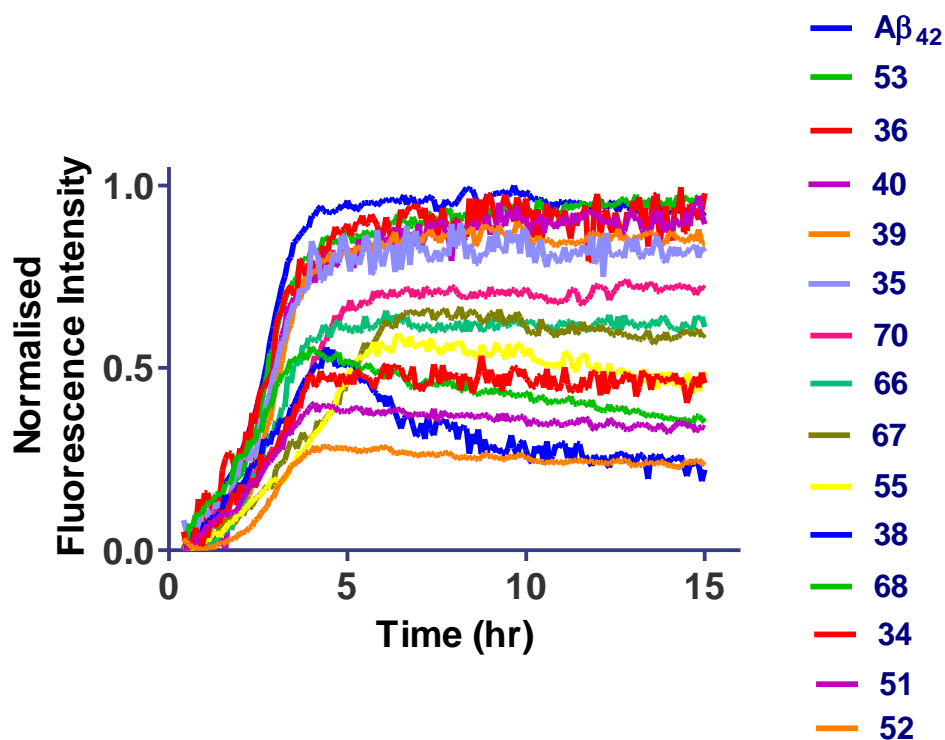

**Figure ESI 1:**  $A\beta_{42}$  aggregation profiles in the ThT assay with the addition of biazurones (50  $\mu$ M).  $A\beta_{42}$  curve represent the time course of  $A\beta_{42}$  aggregation alone (initial concentration of 10  $\mu$ M  $A\beta_{42}$  peptide).

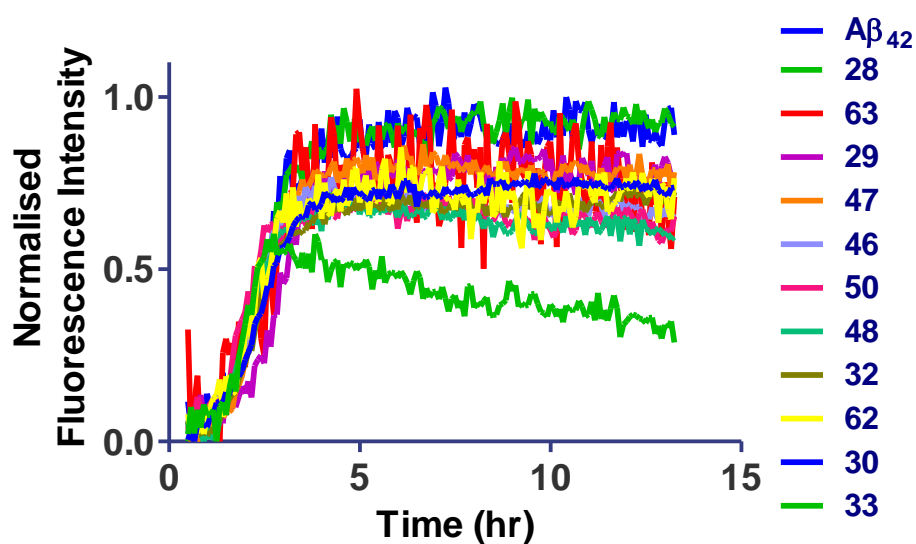

**Figure ESI 2:**  $A\beta_{42}$  aggregation profiles in the ThT assay with the addition of biflavones (50  $\mu$ M).  $A\beta_{42}$  curve represent the time course of  $A\beta_{42}$  aggregation alone (initial concentration of 10  $\mu$ M  $A\beta_{42}$  peptide). Overly fluorescent compounds have been omitted.

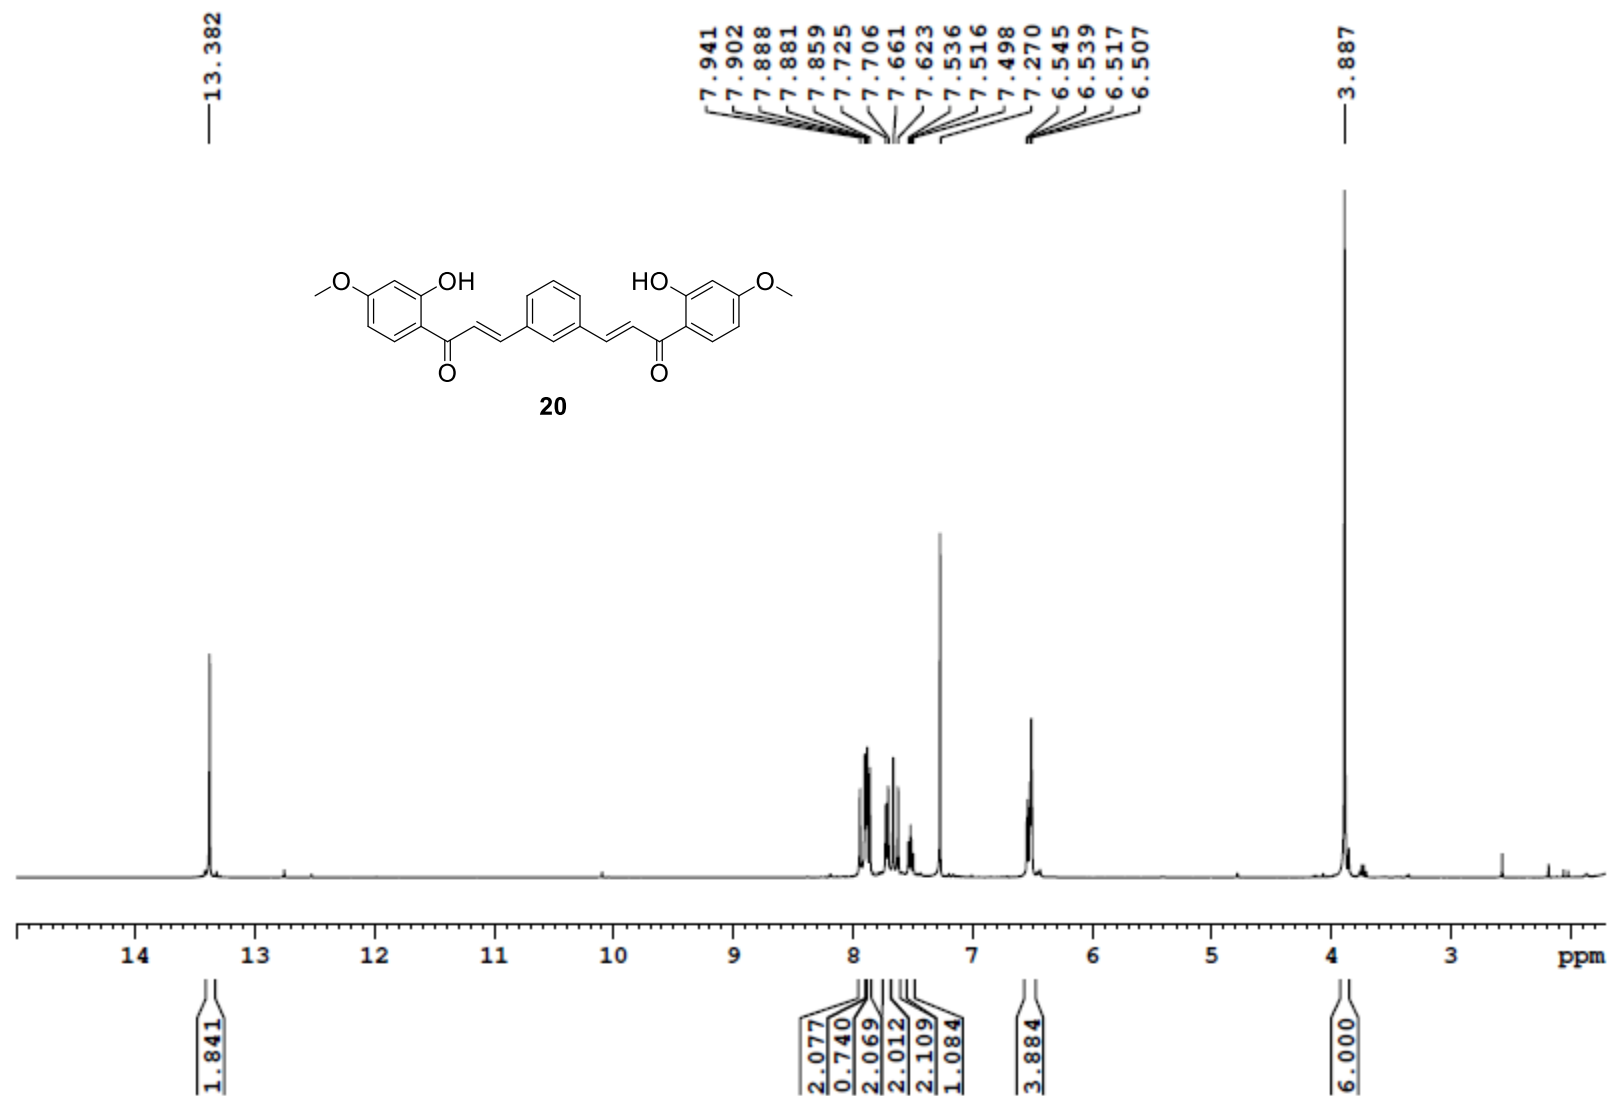



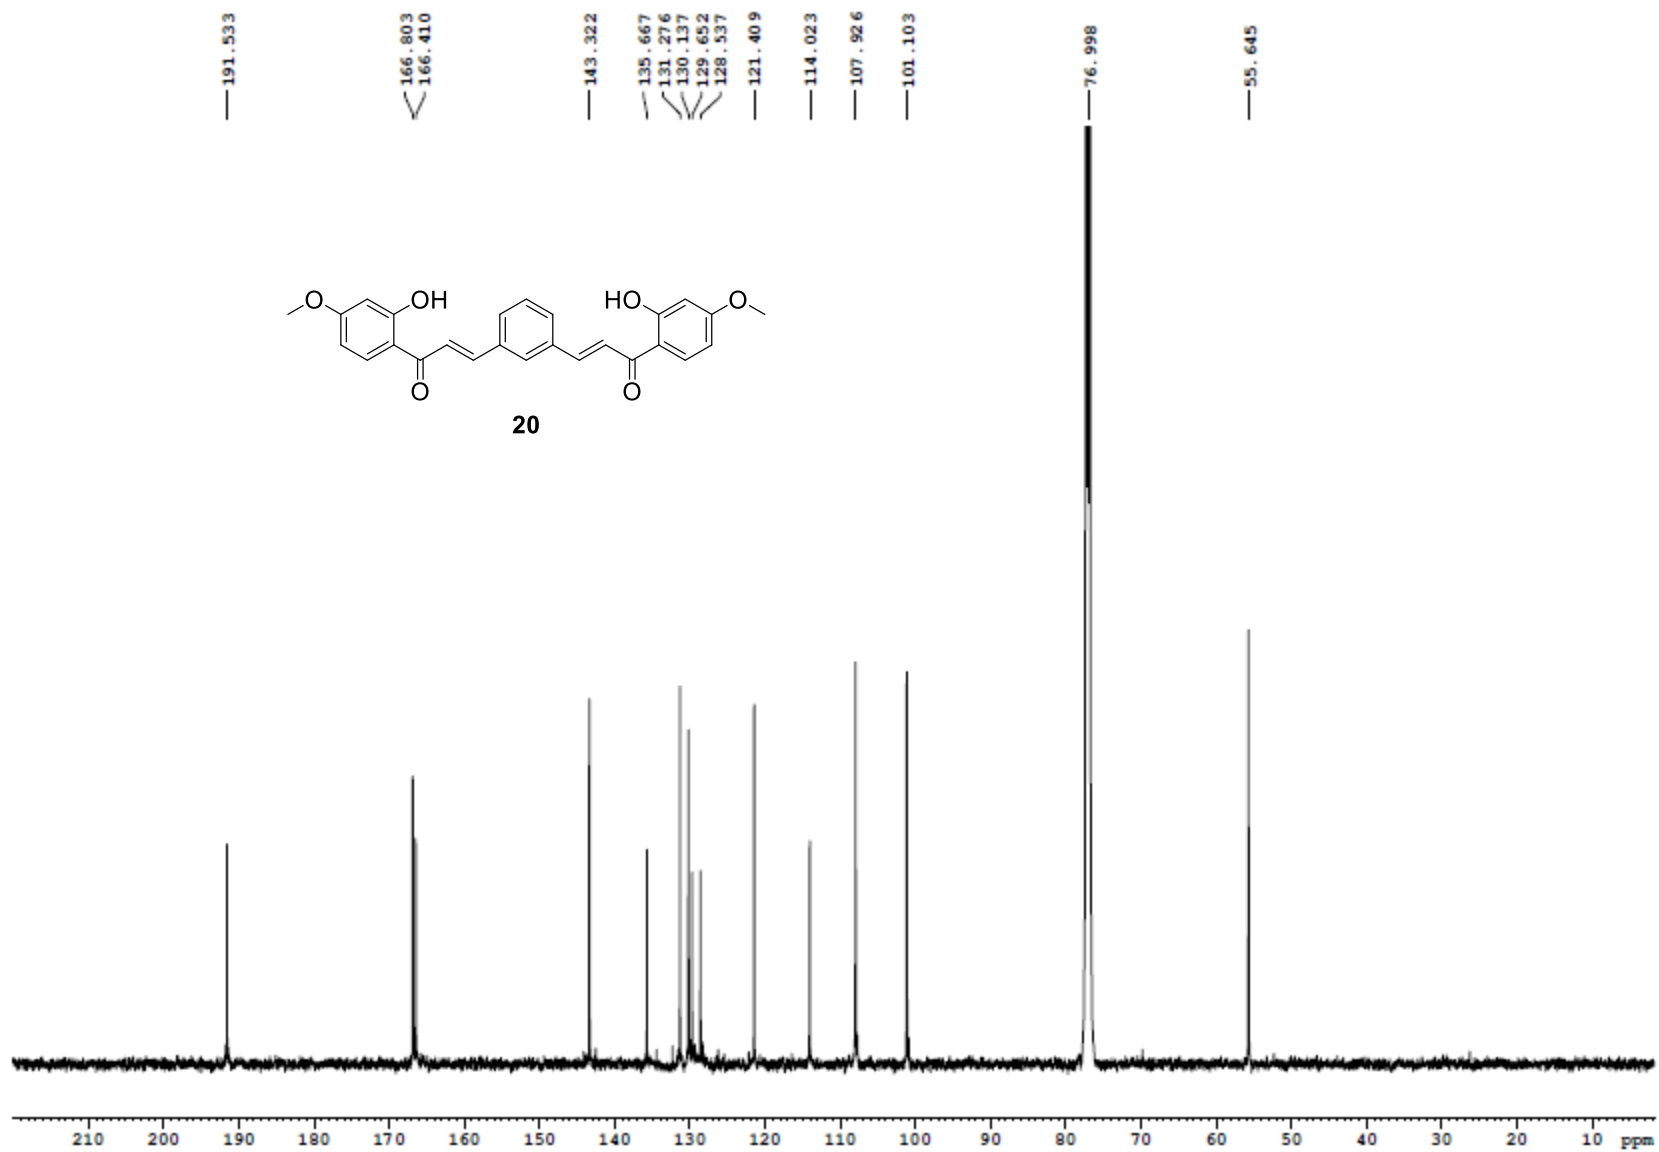

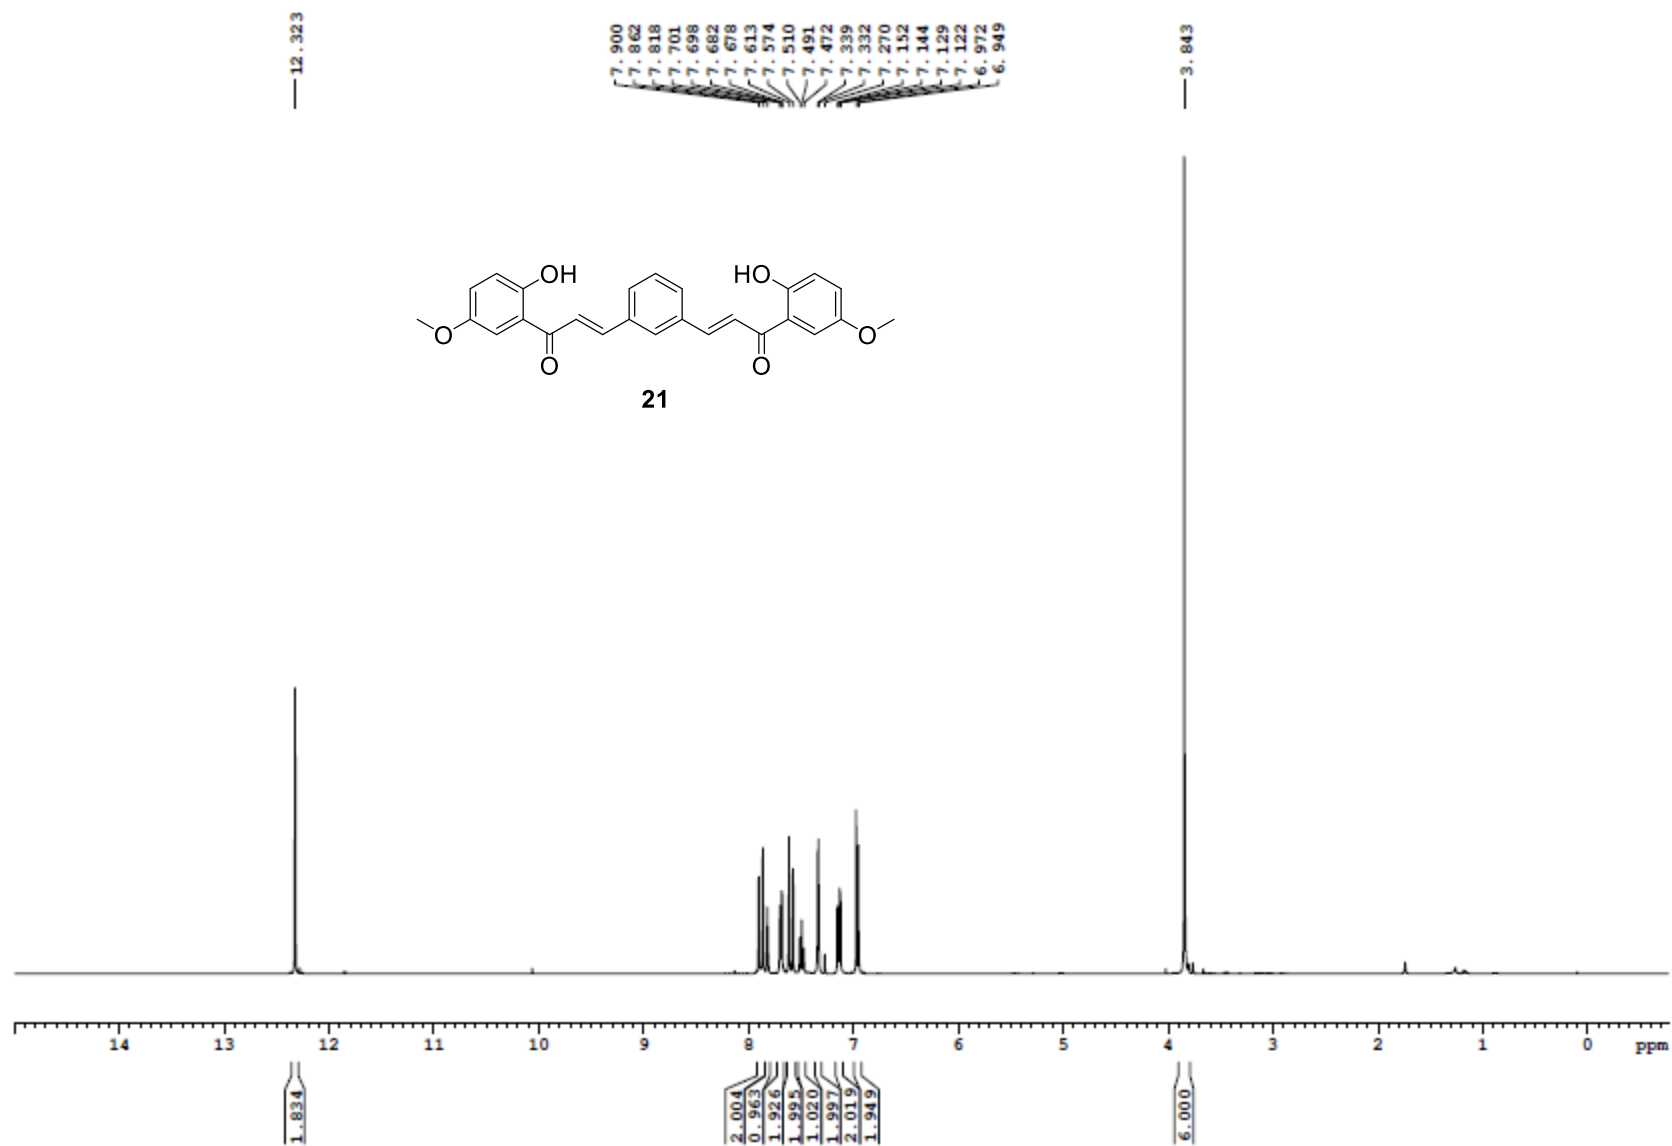

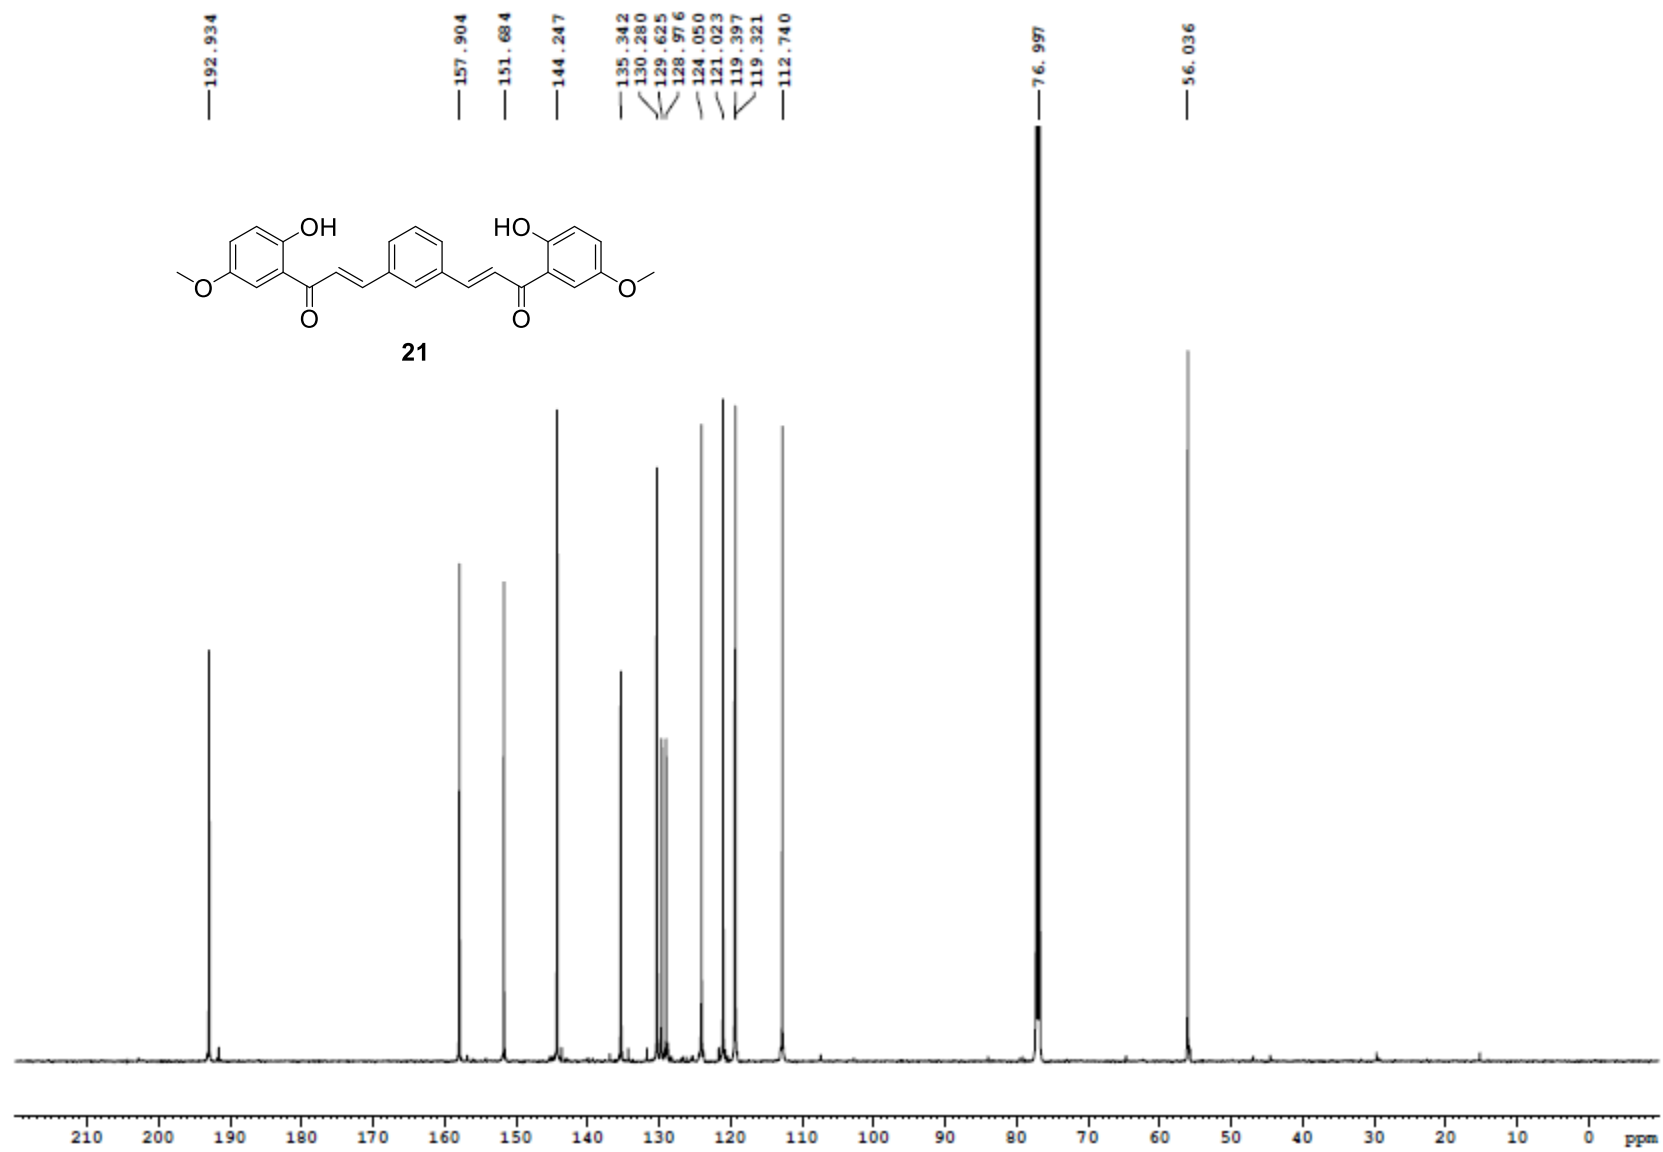

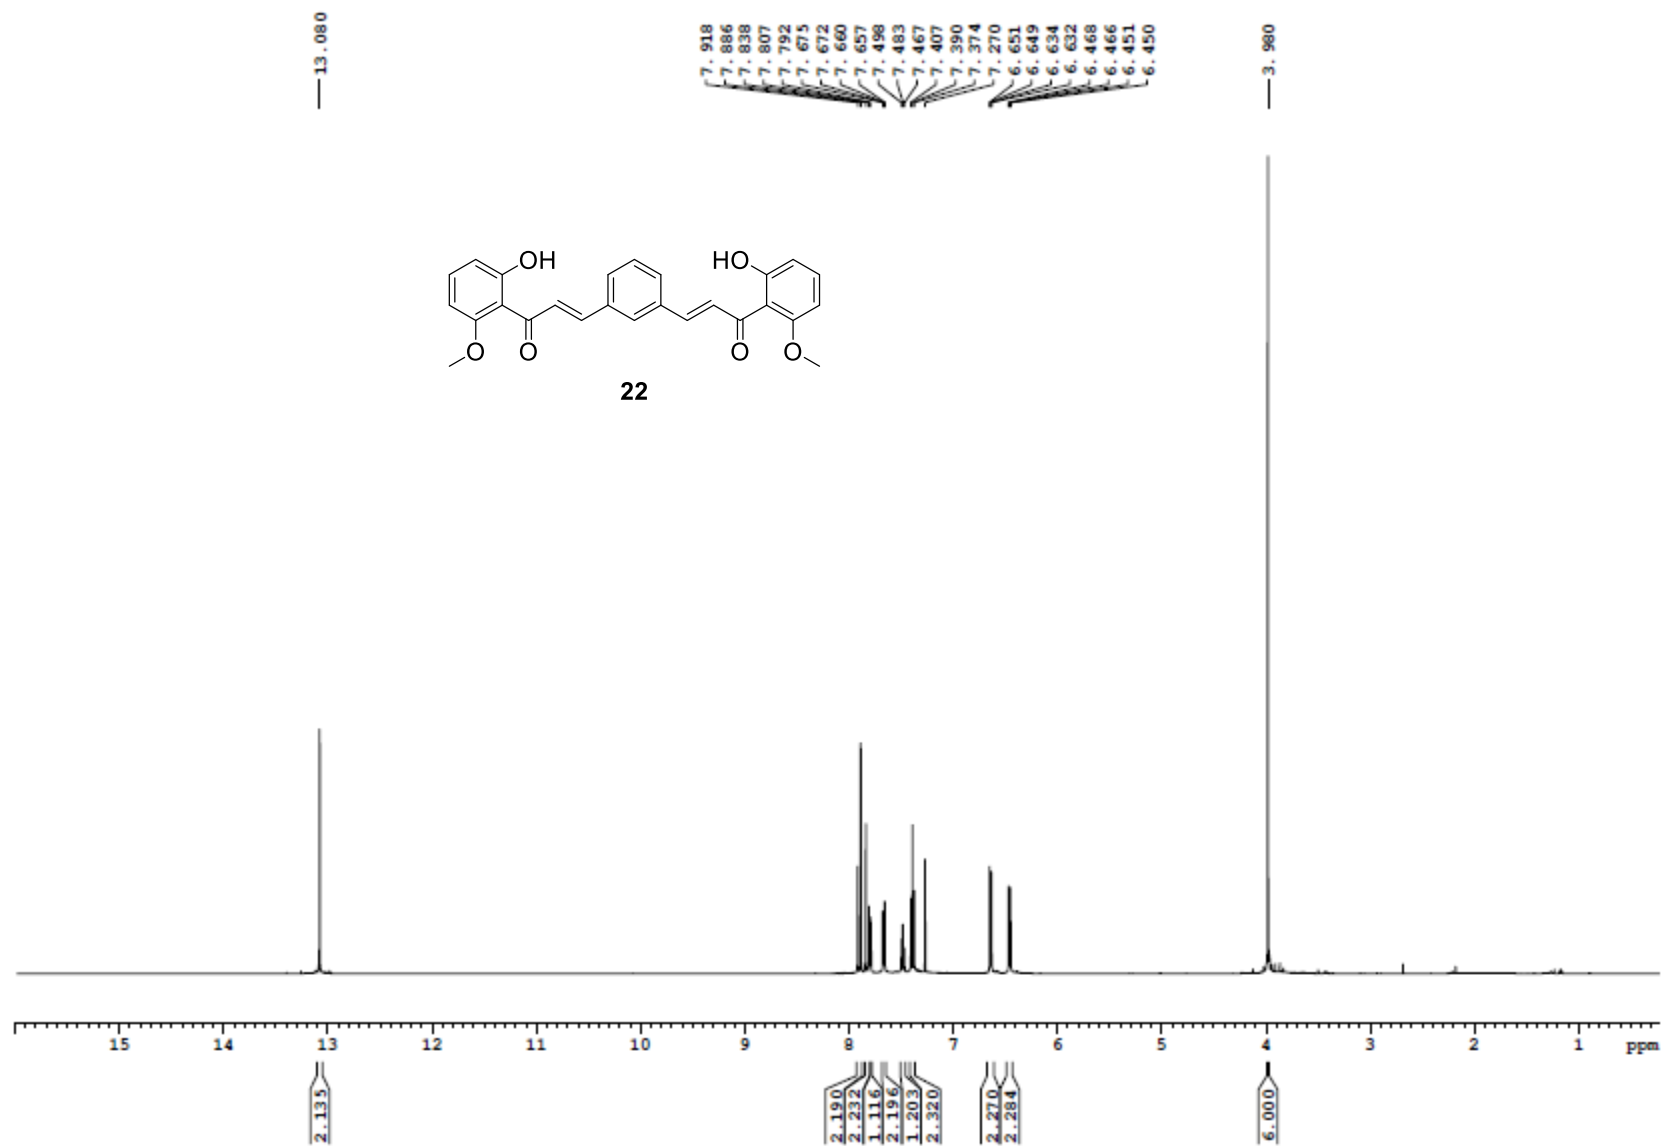

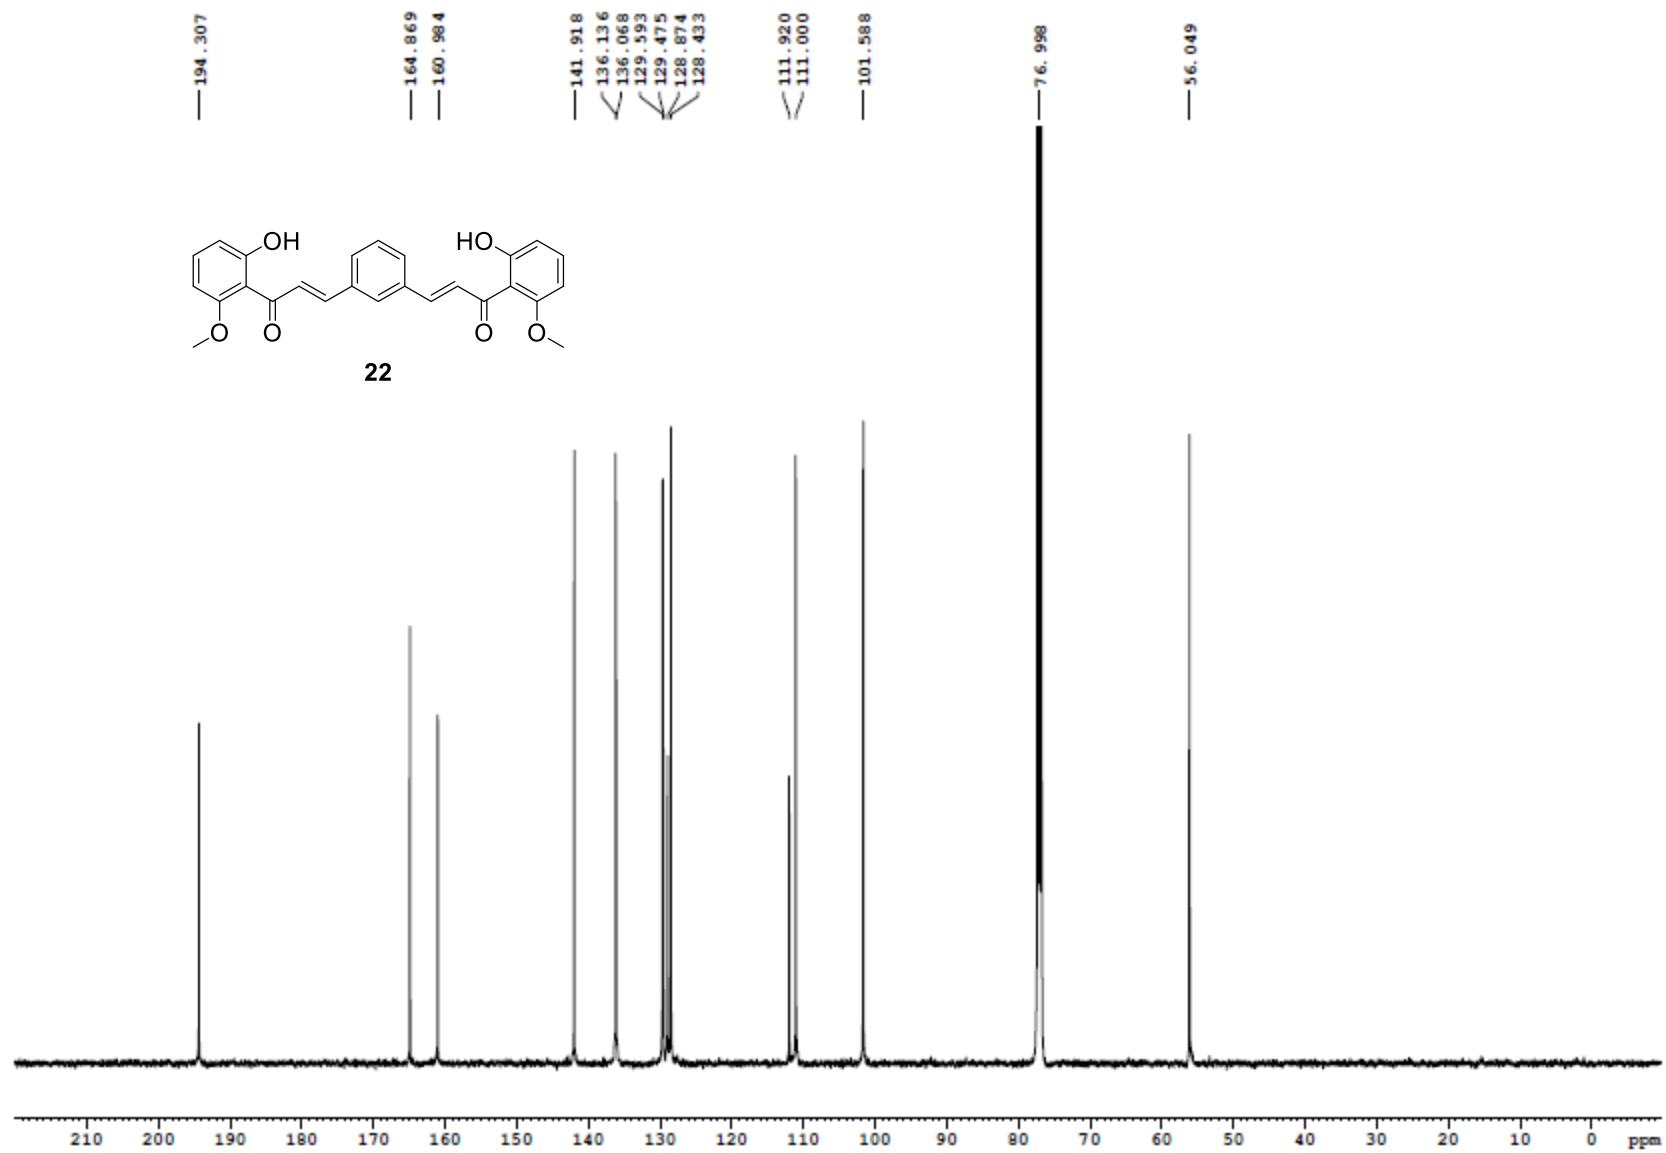

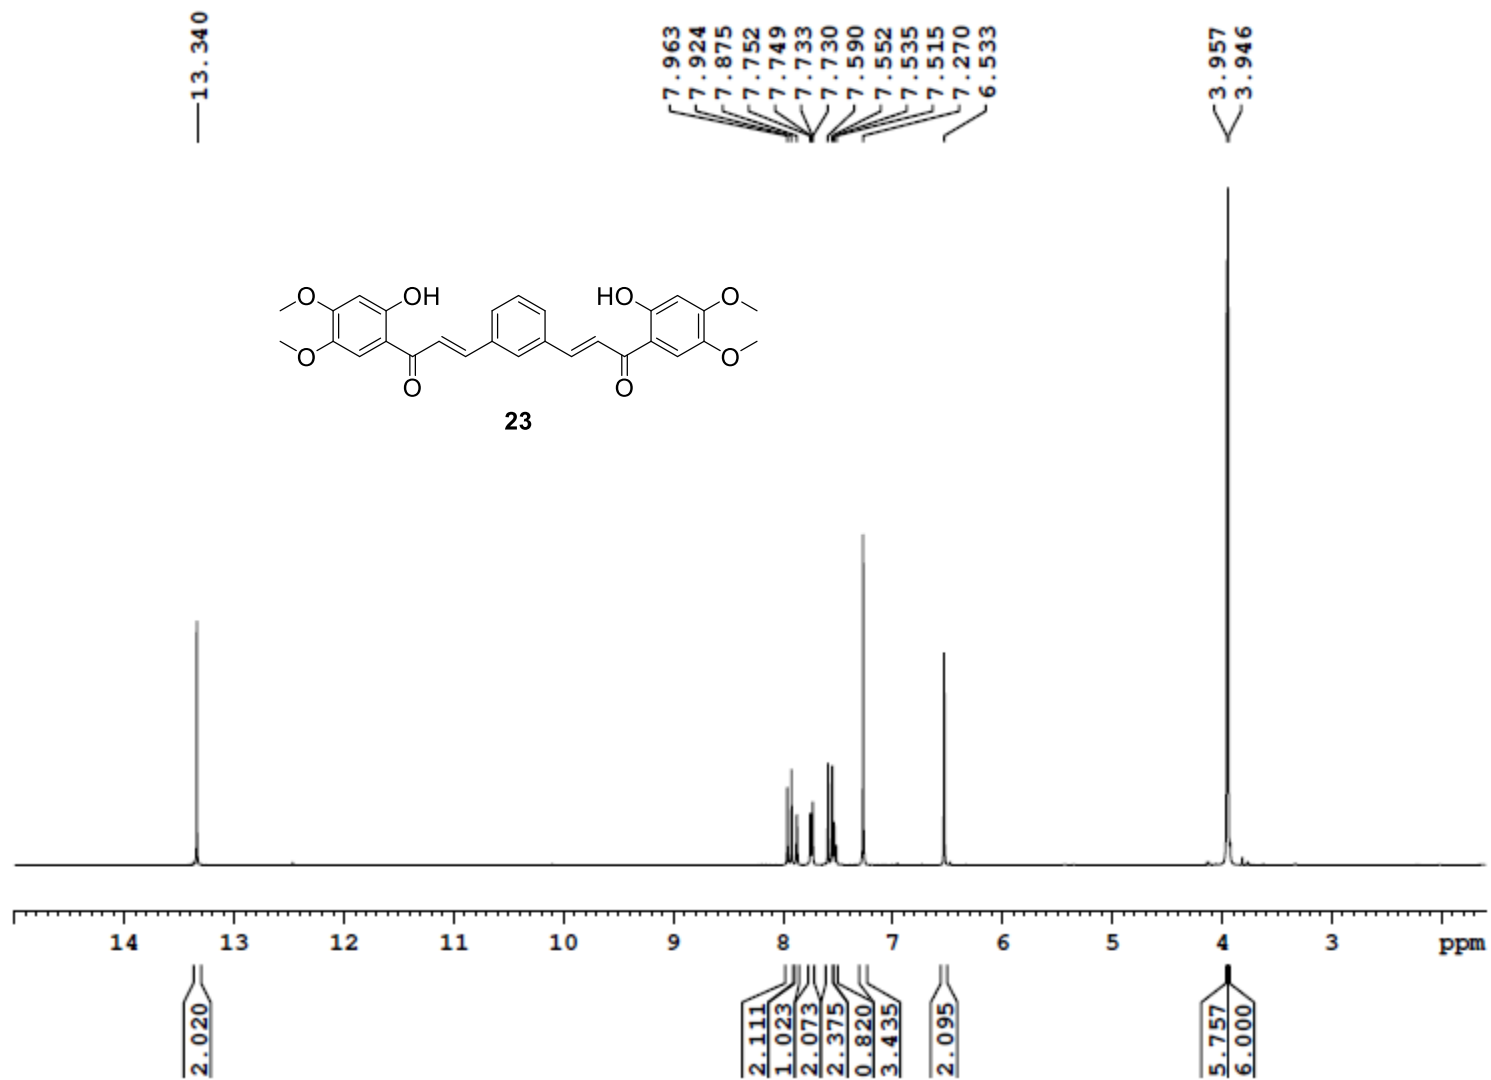

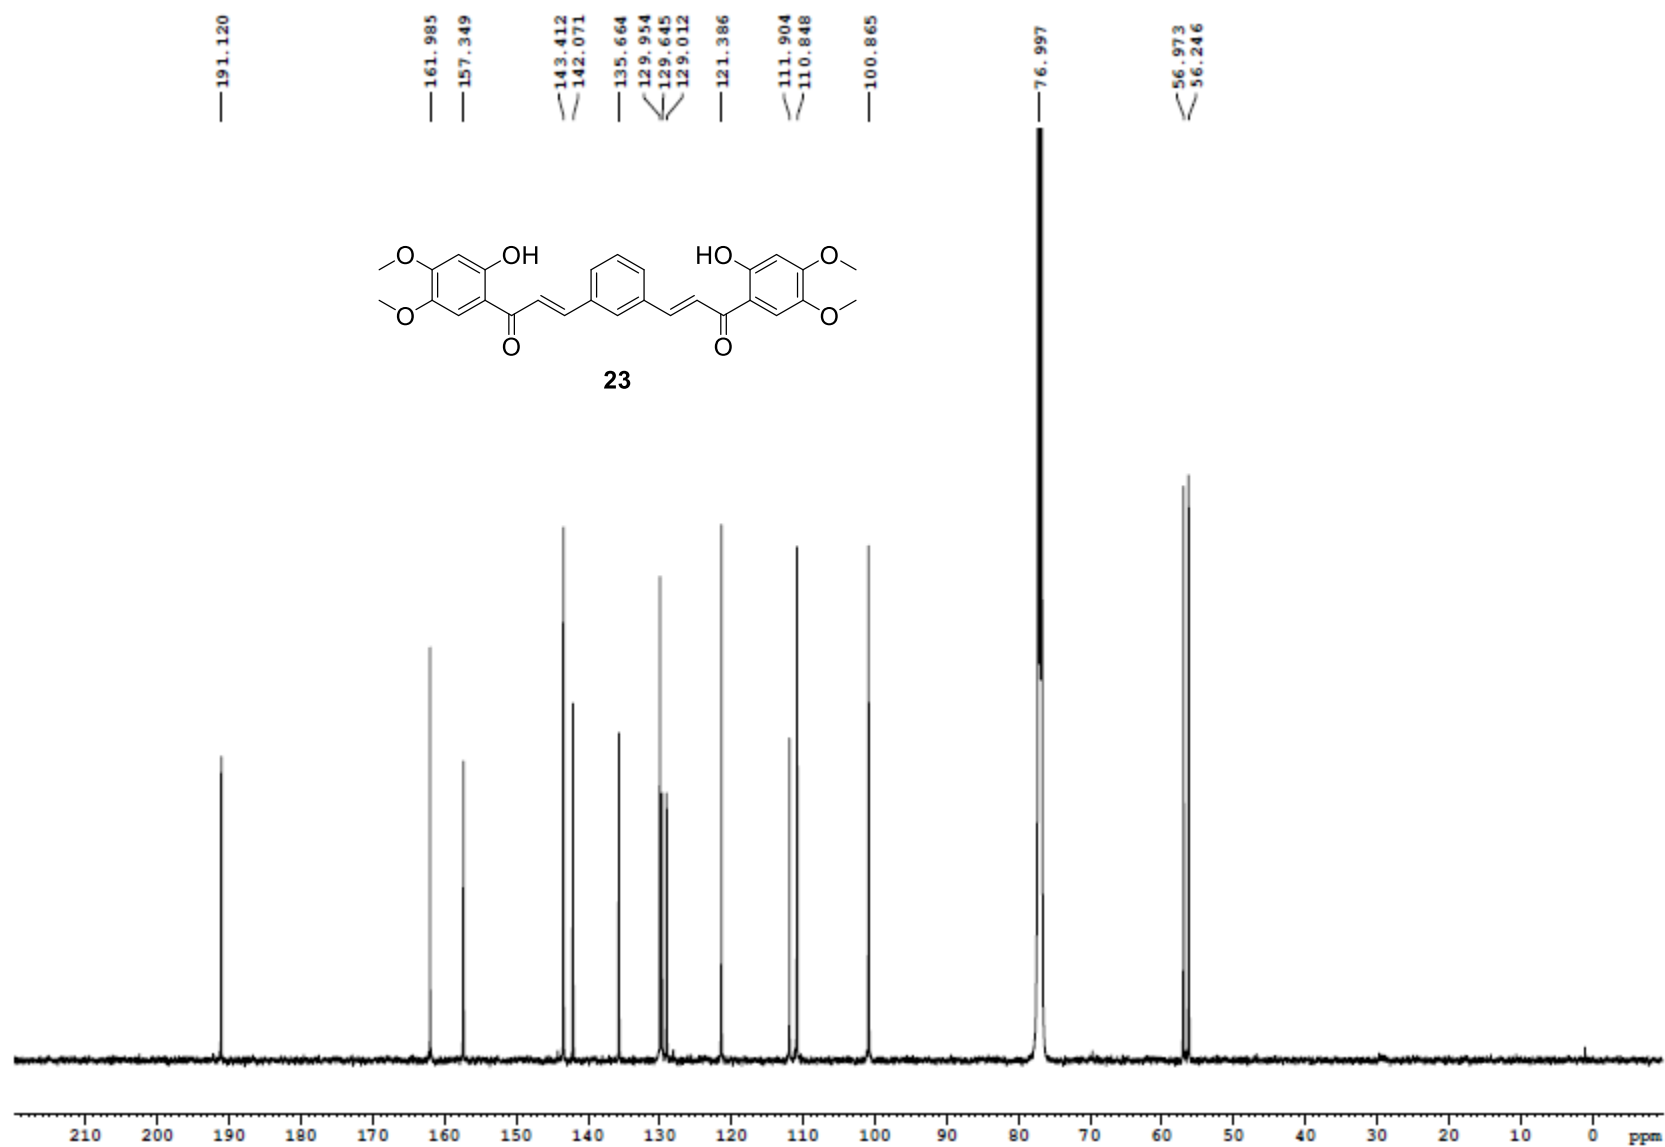

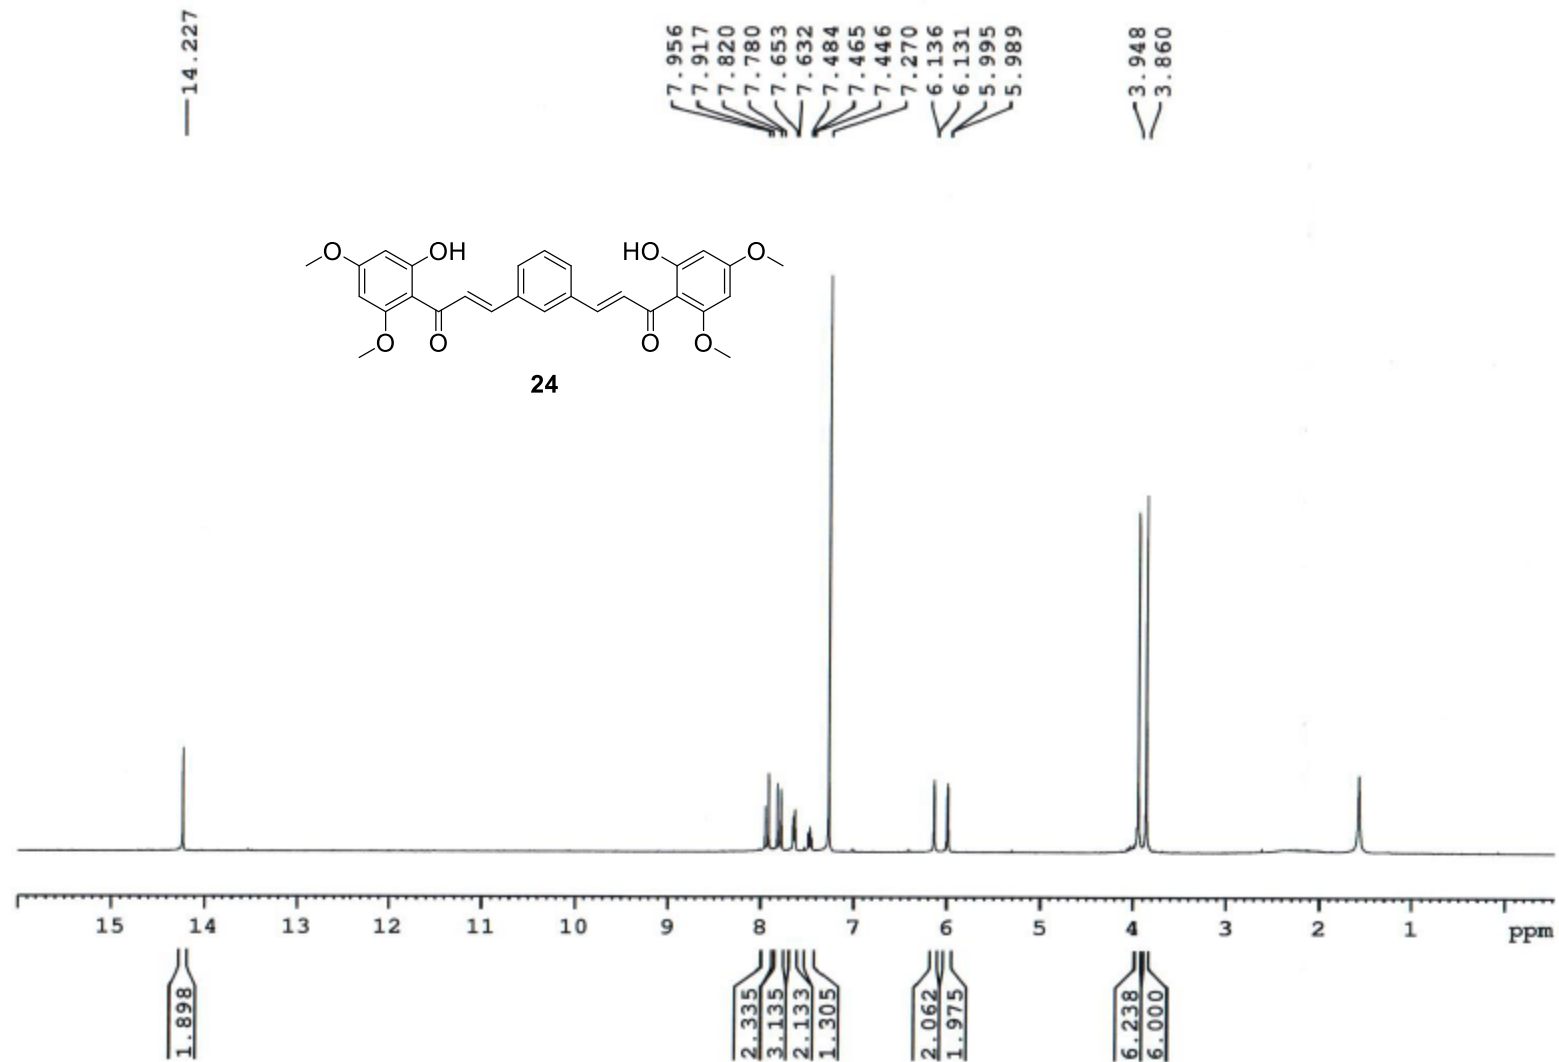



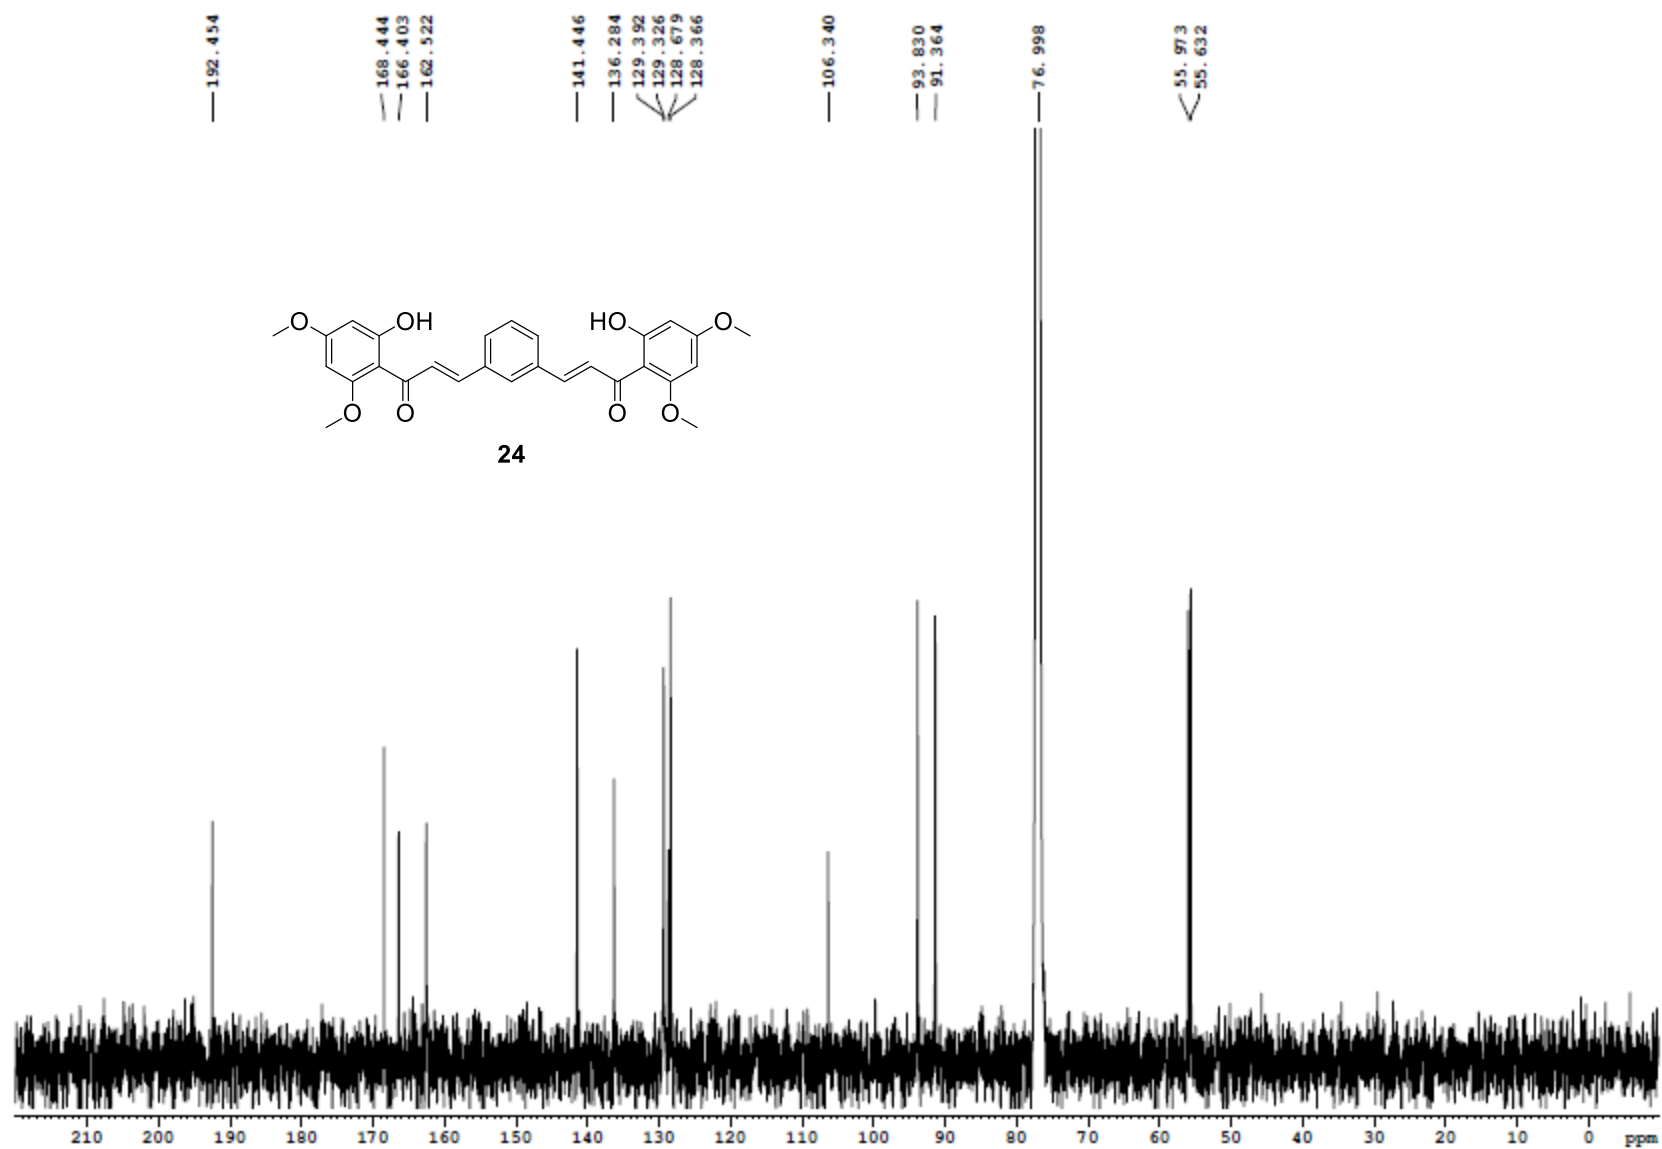

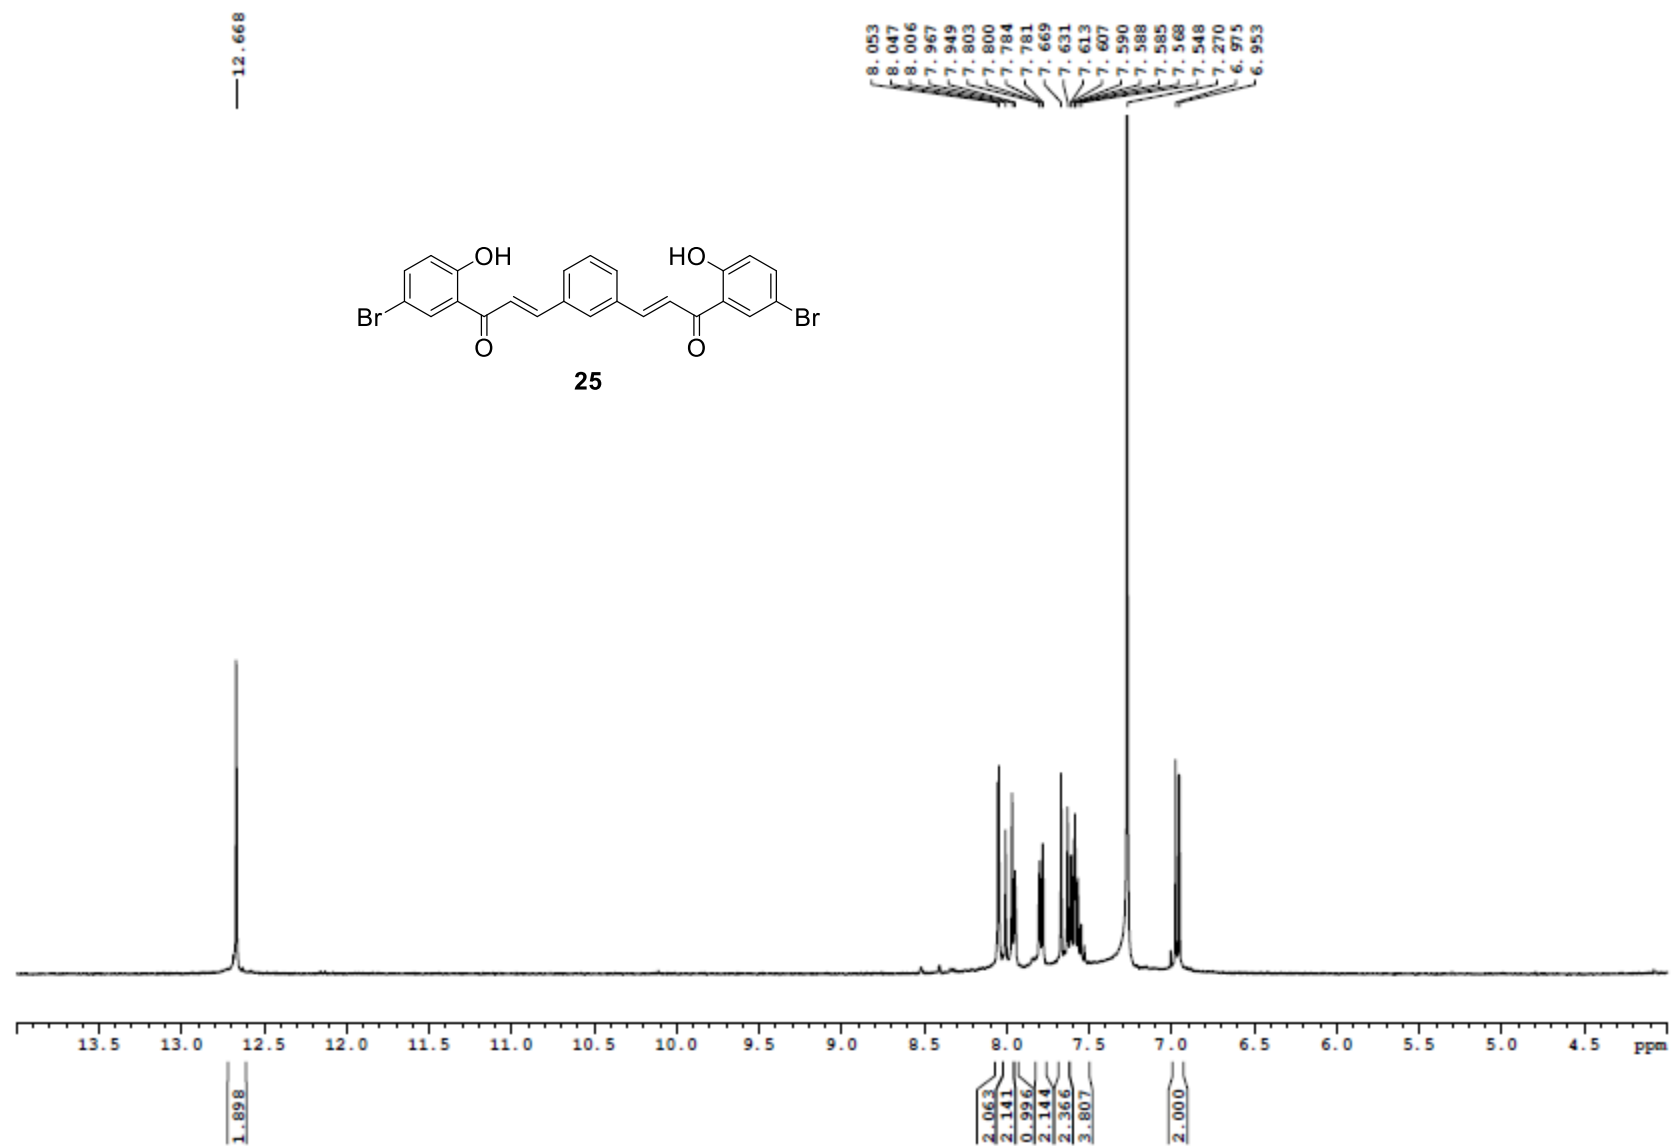

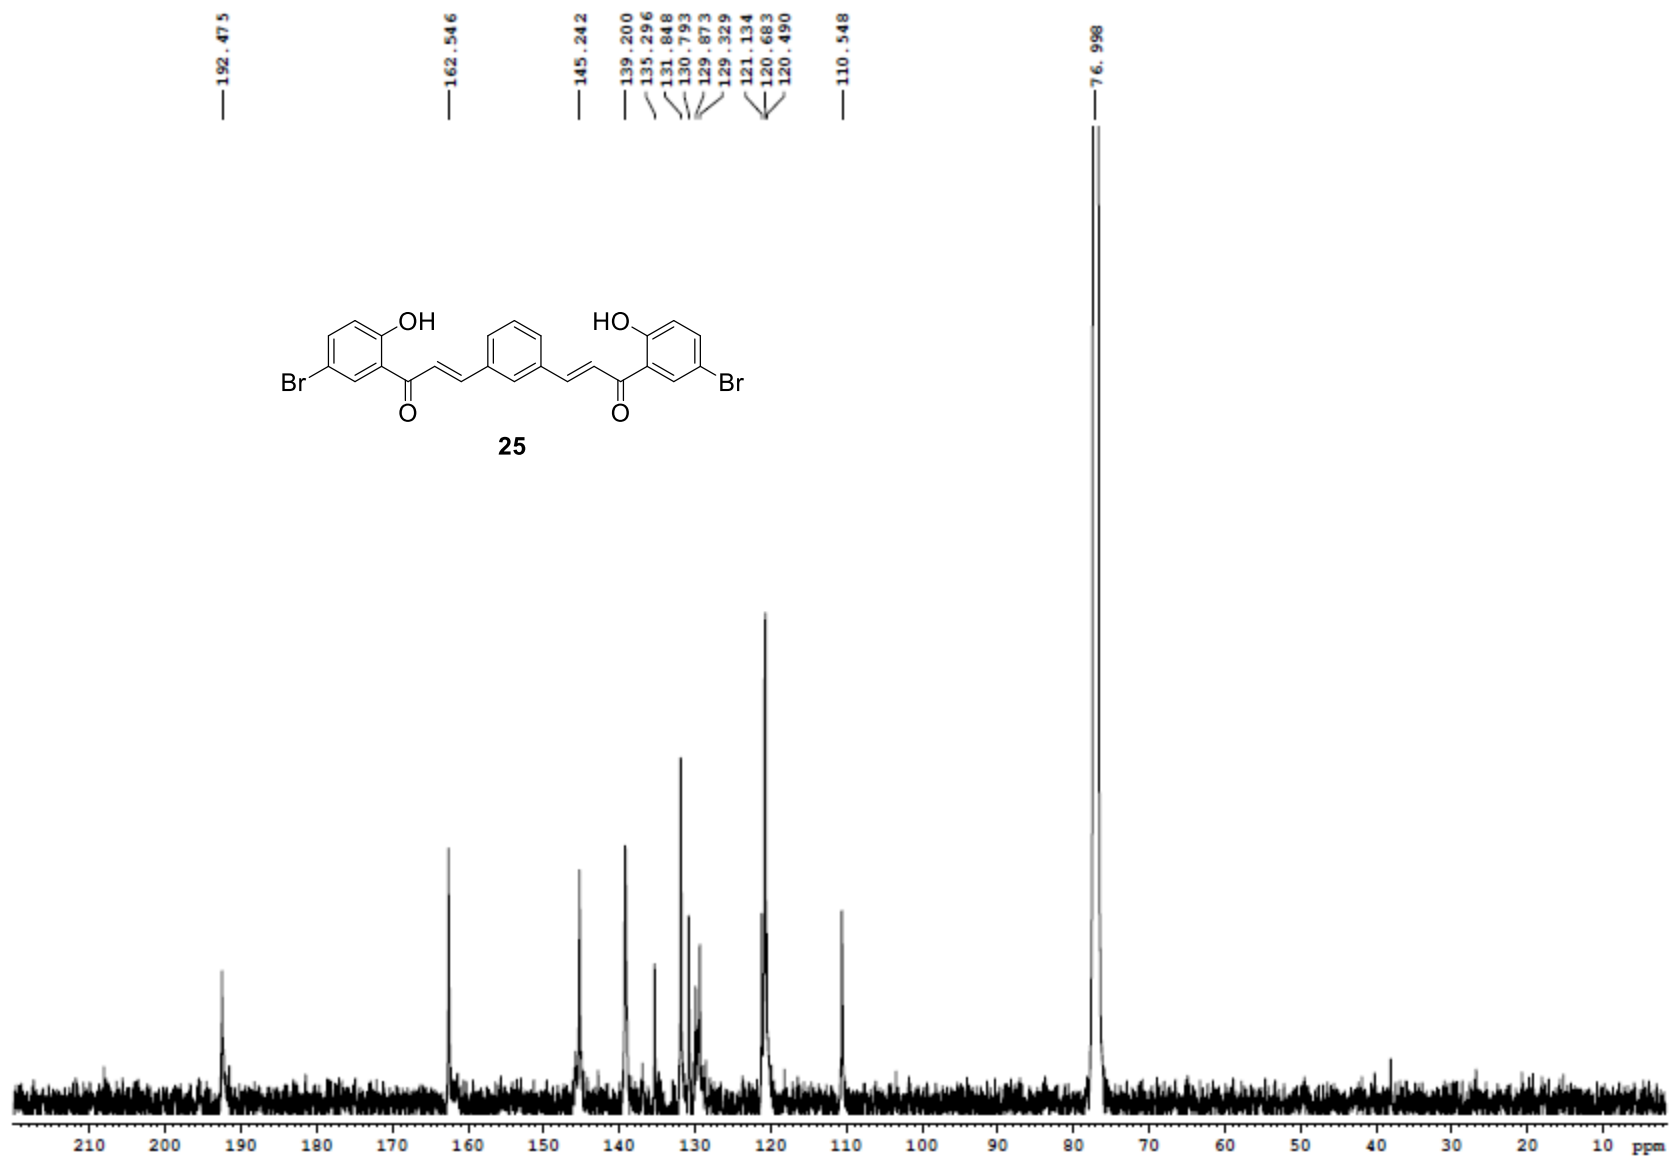

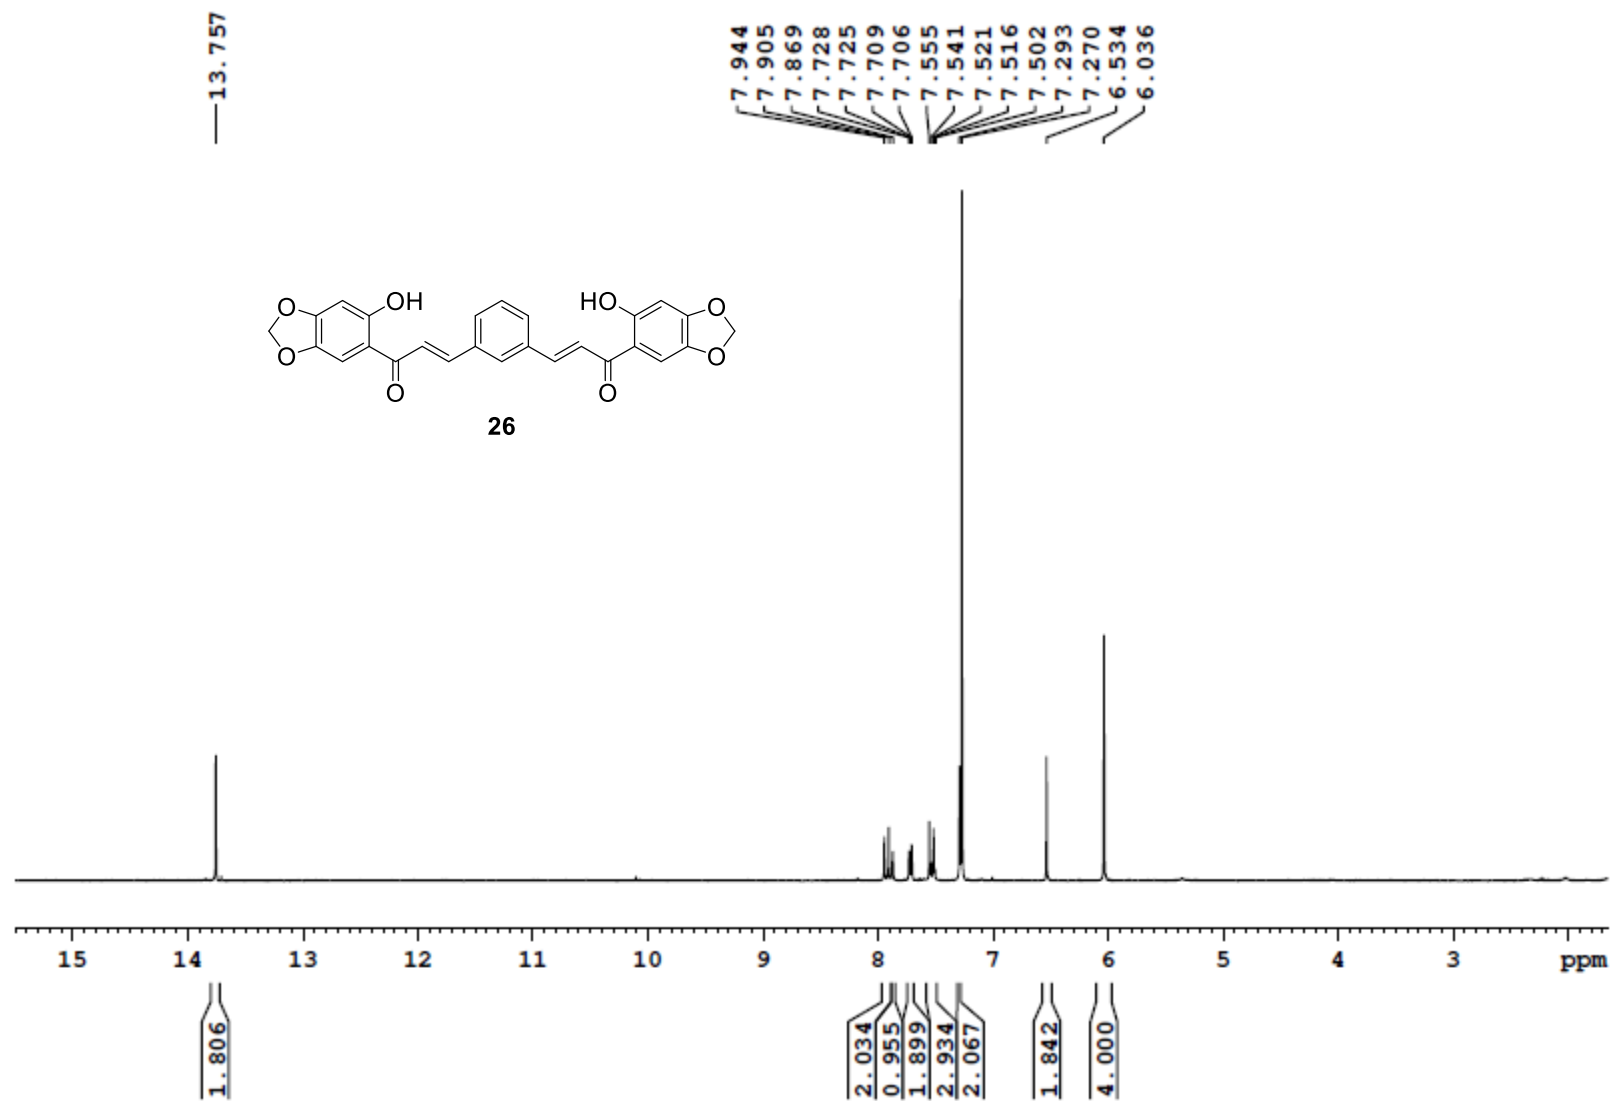

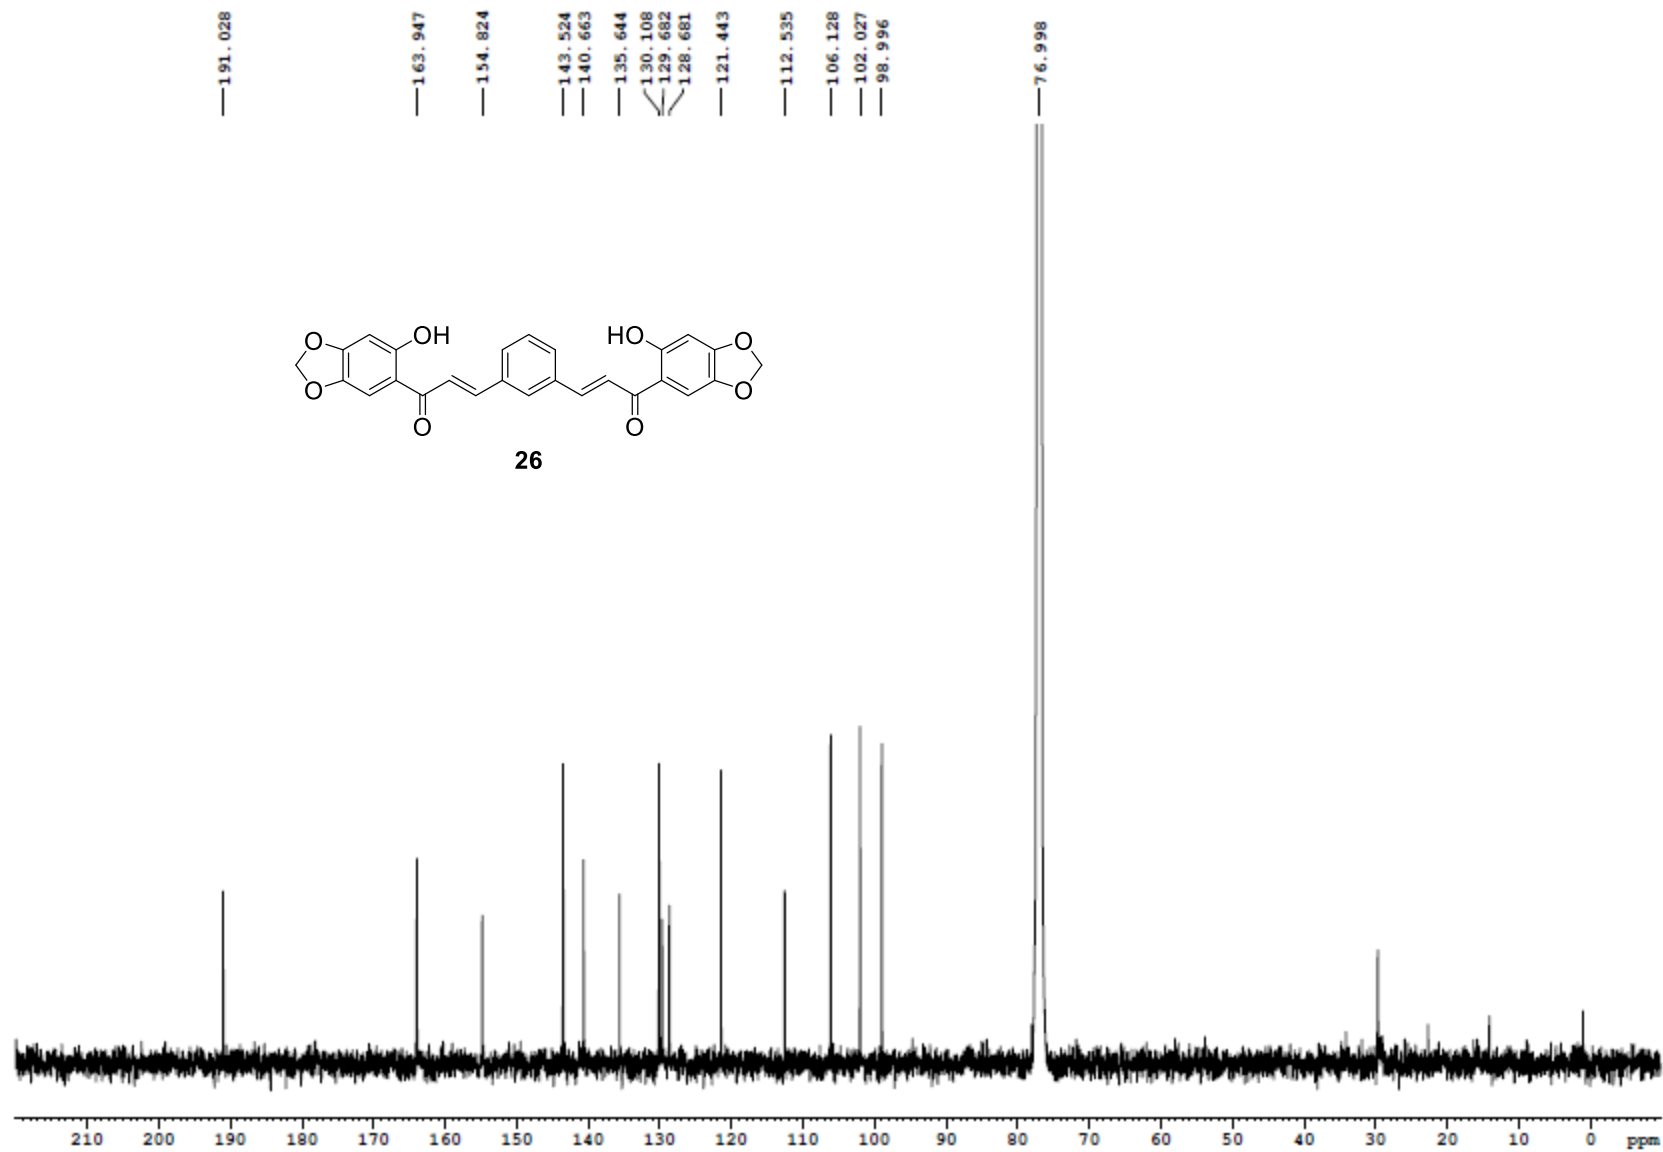

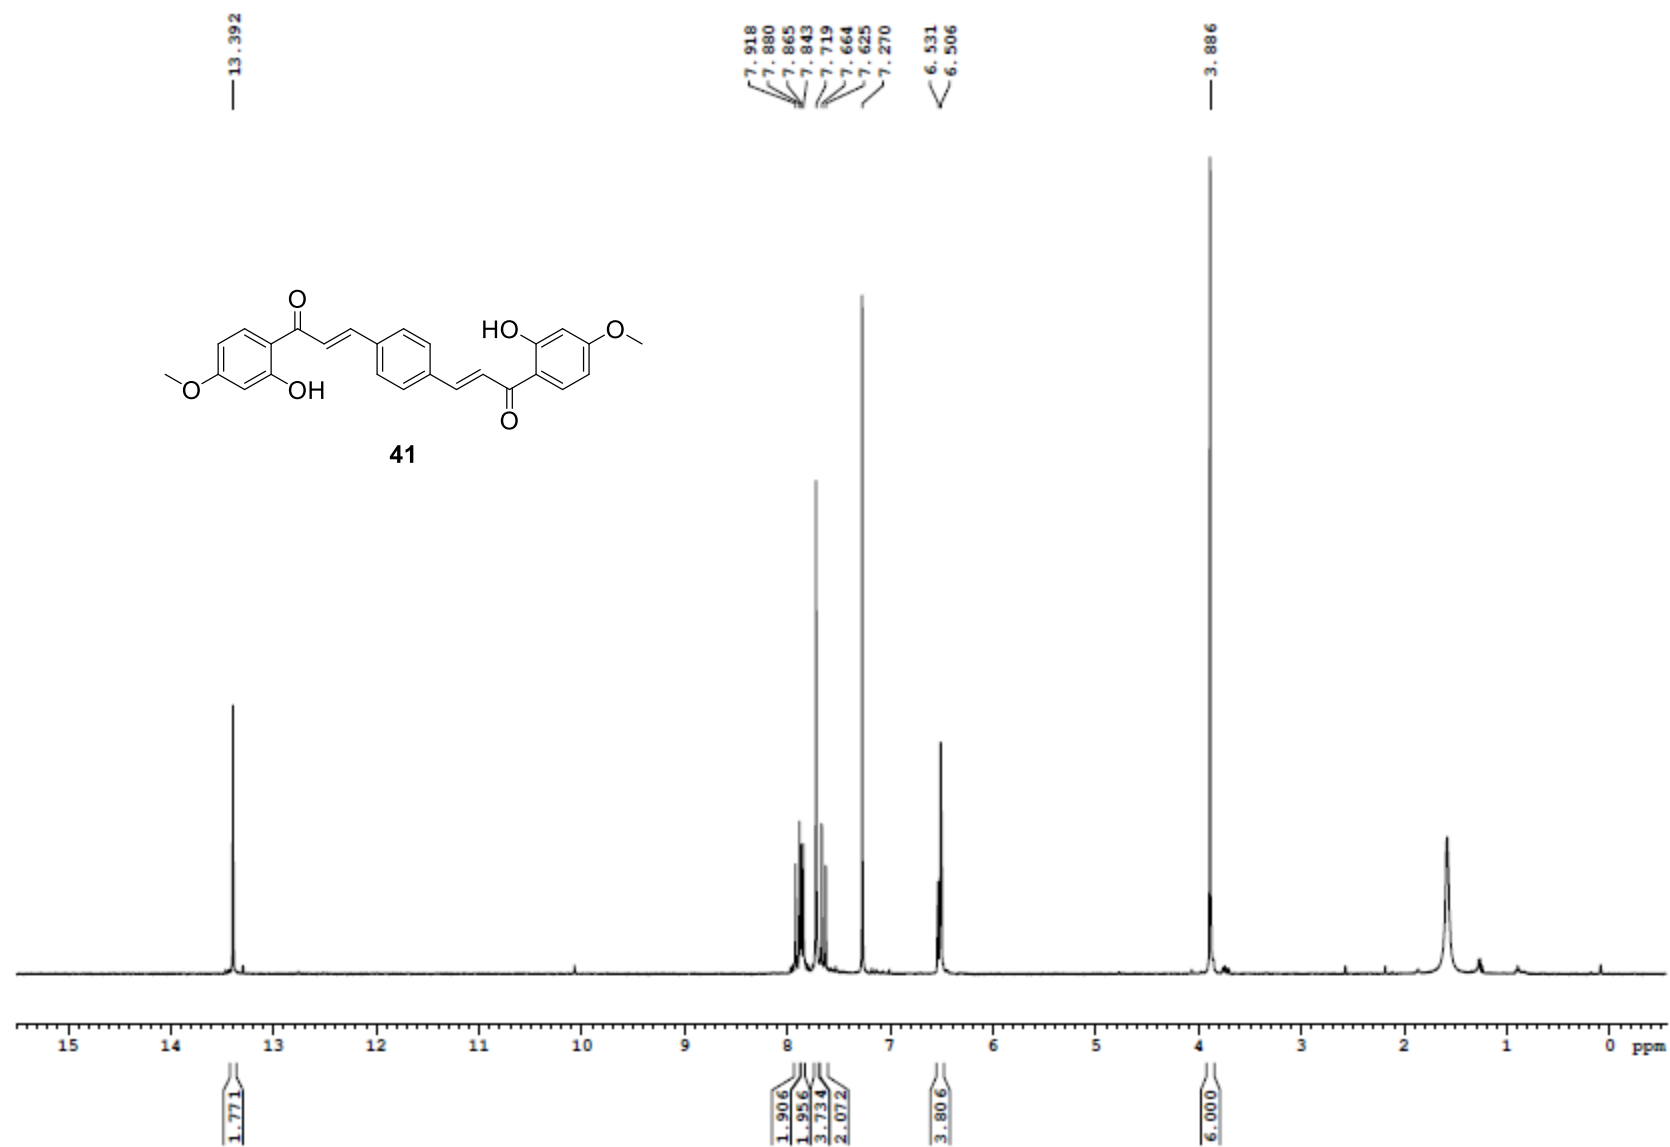

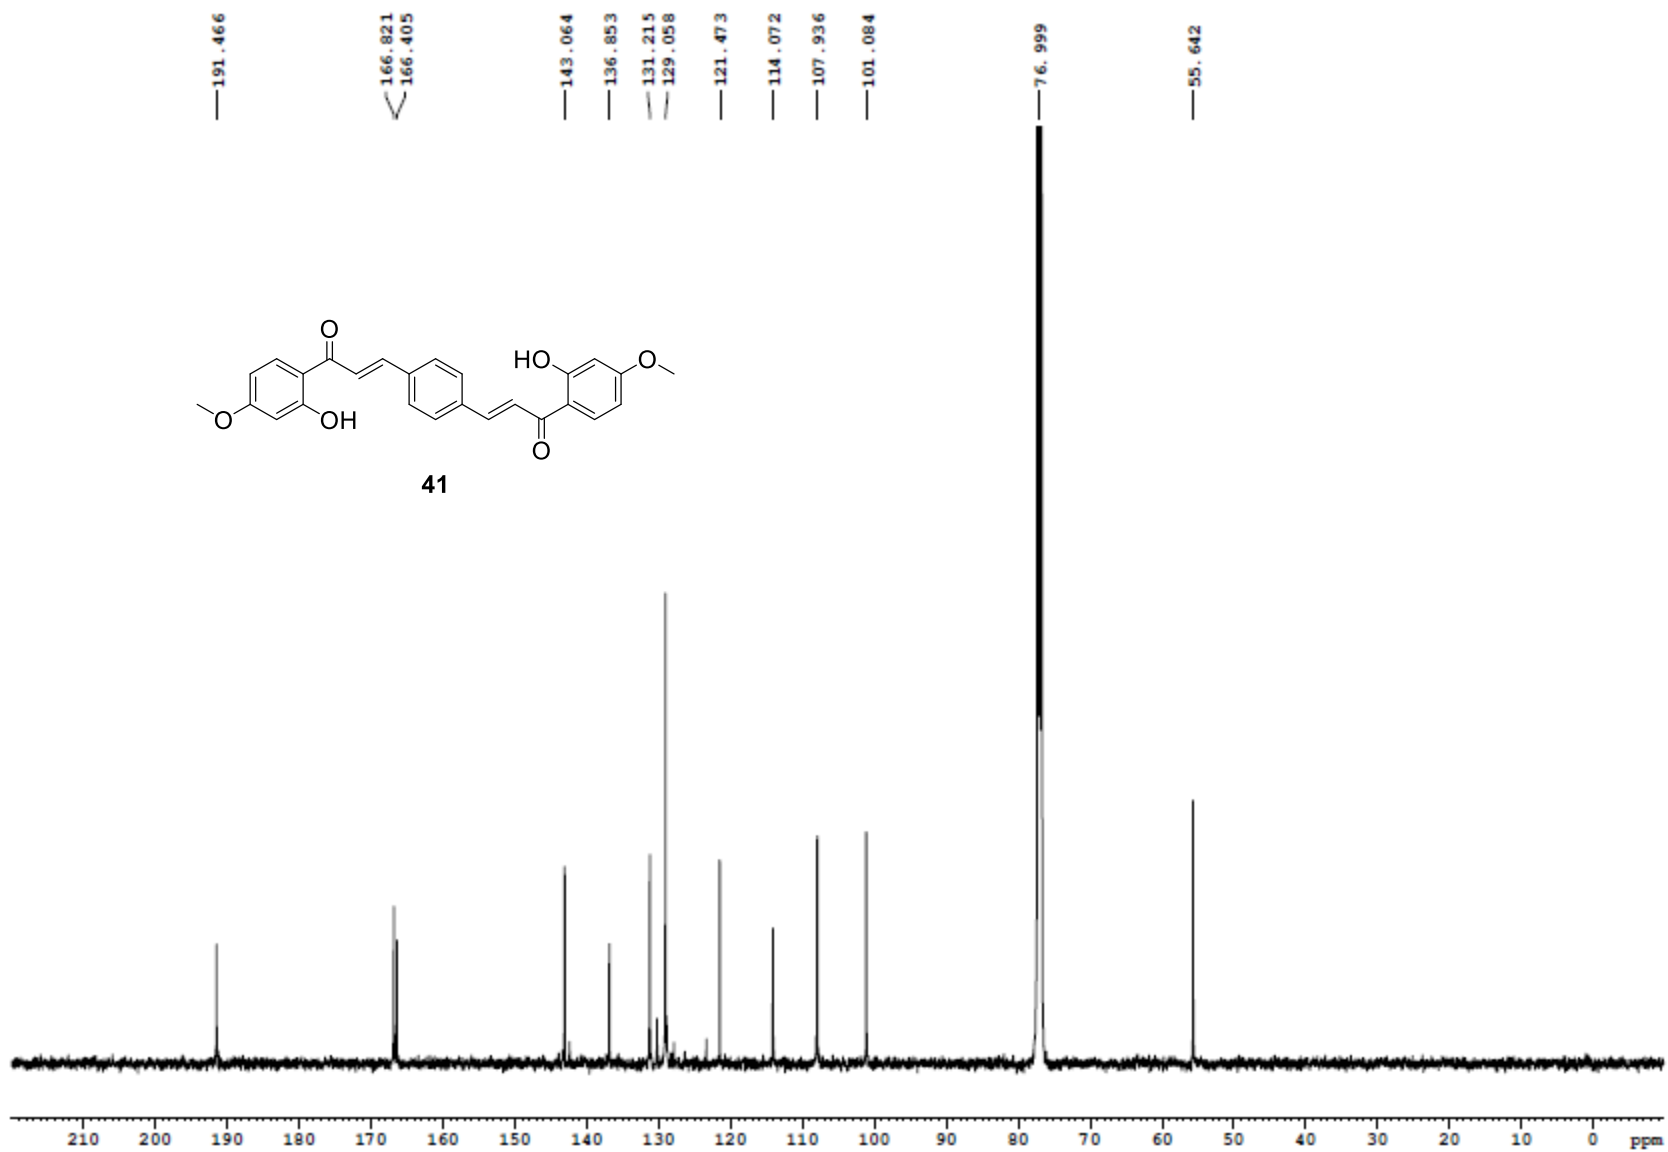

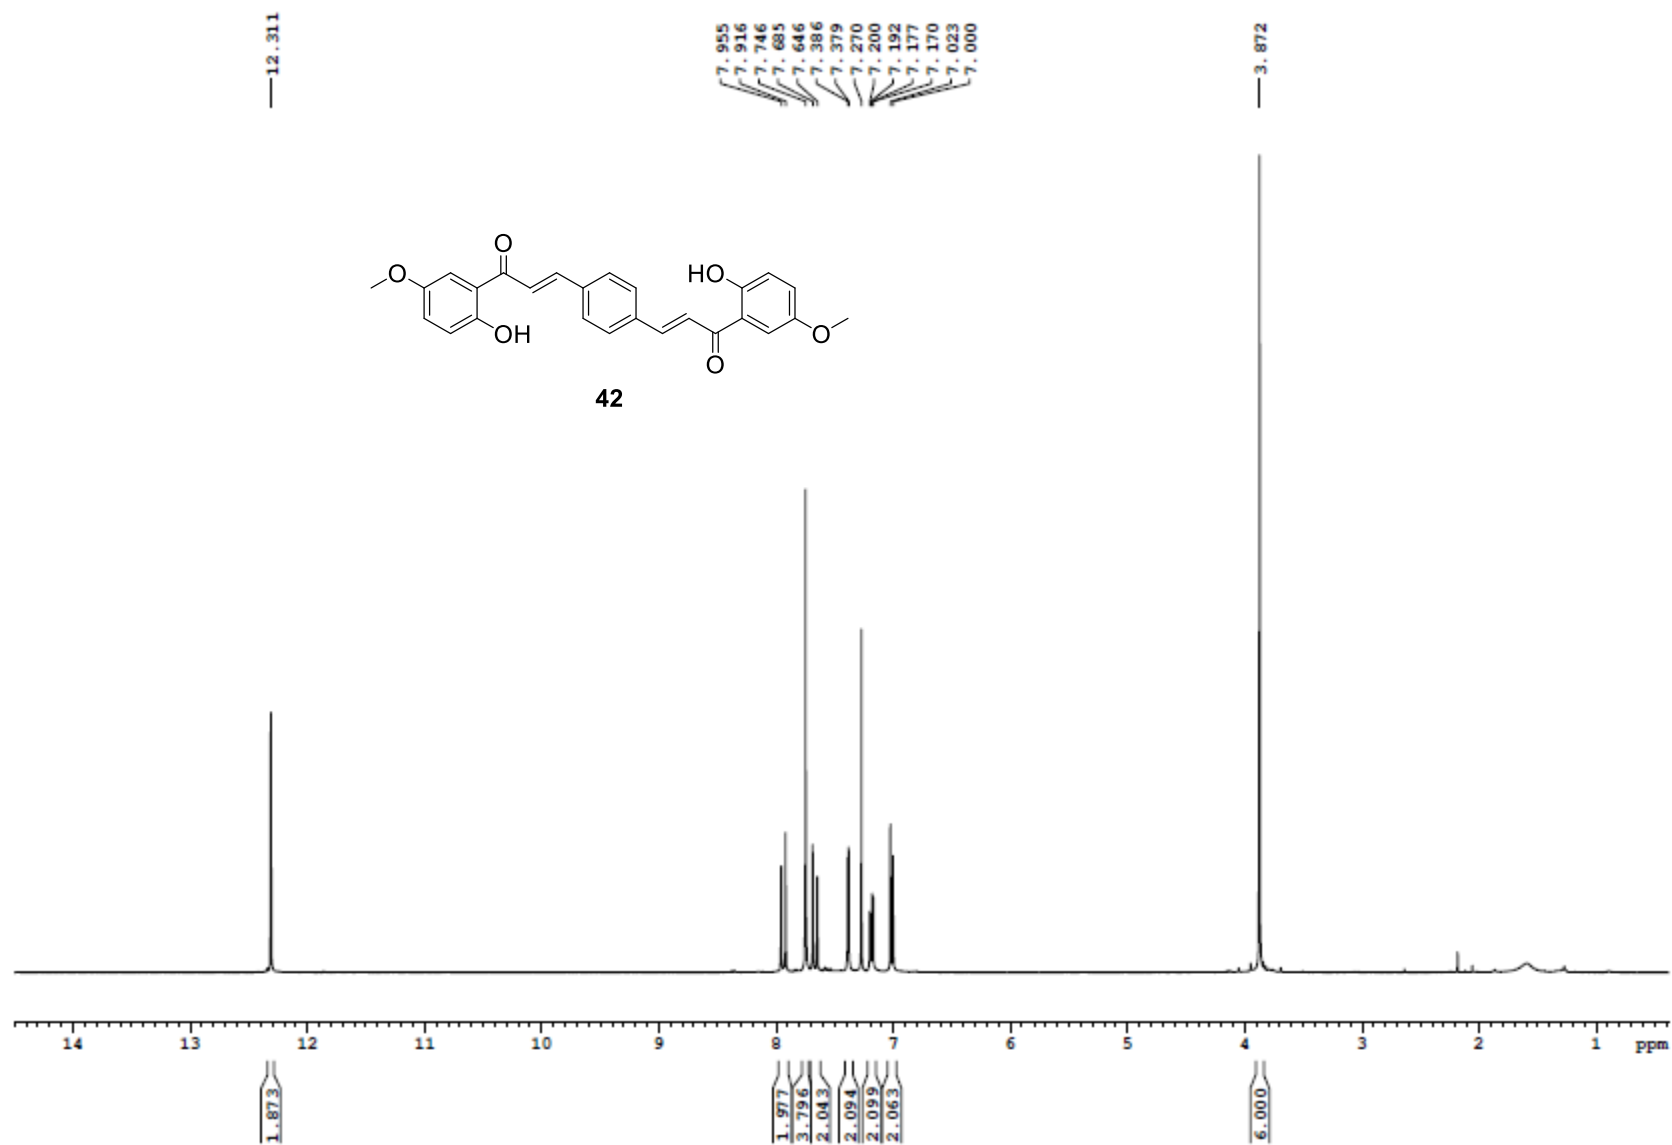



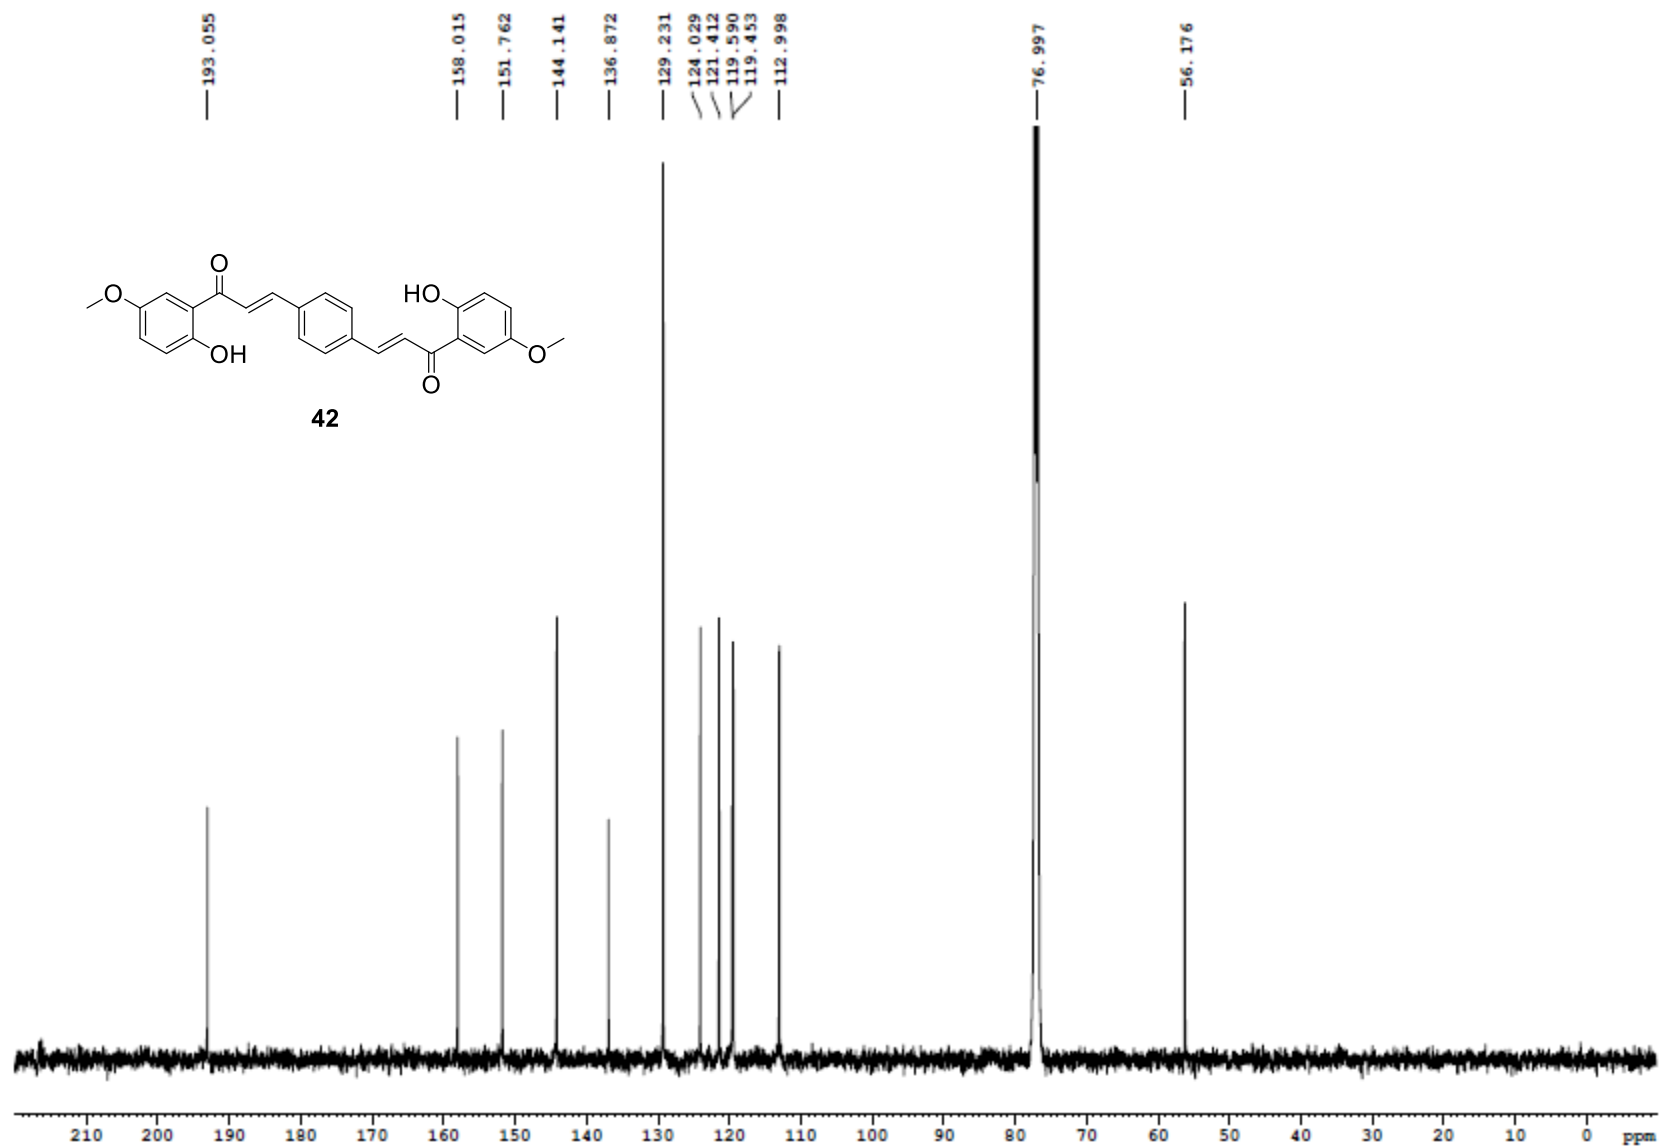

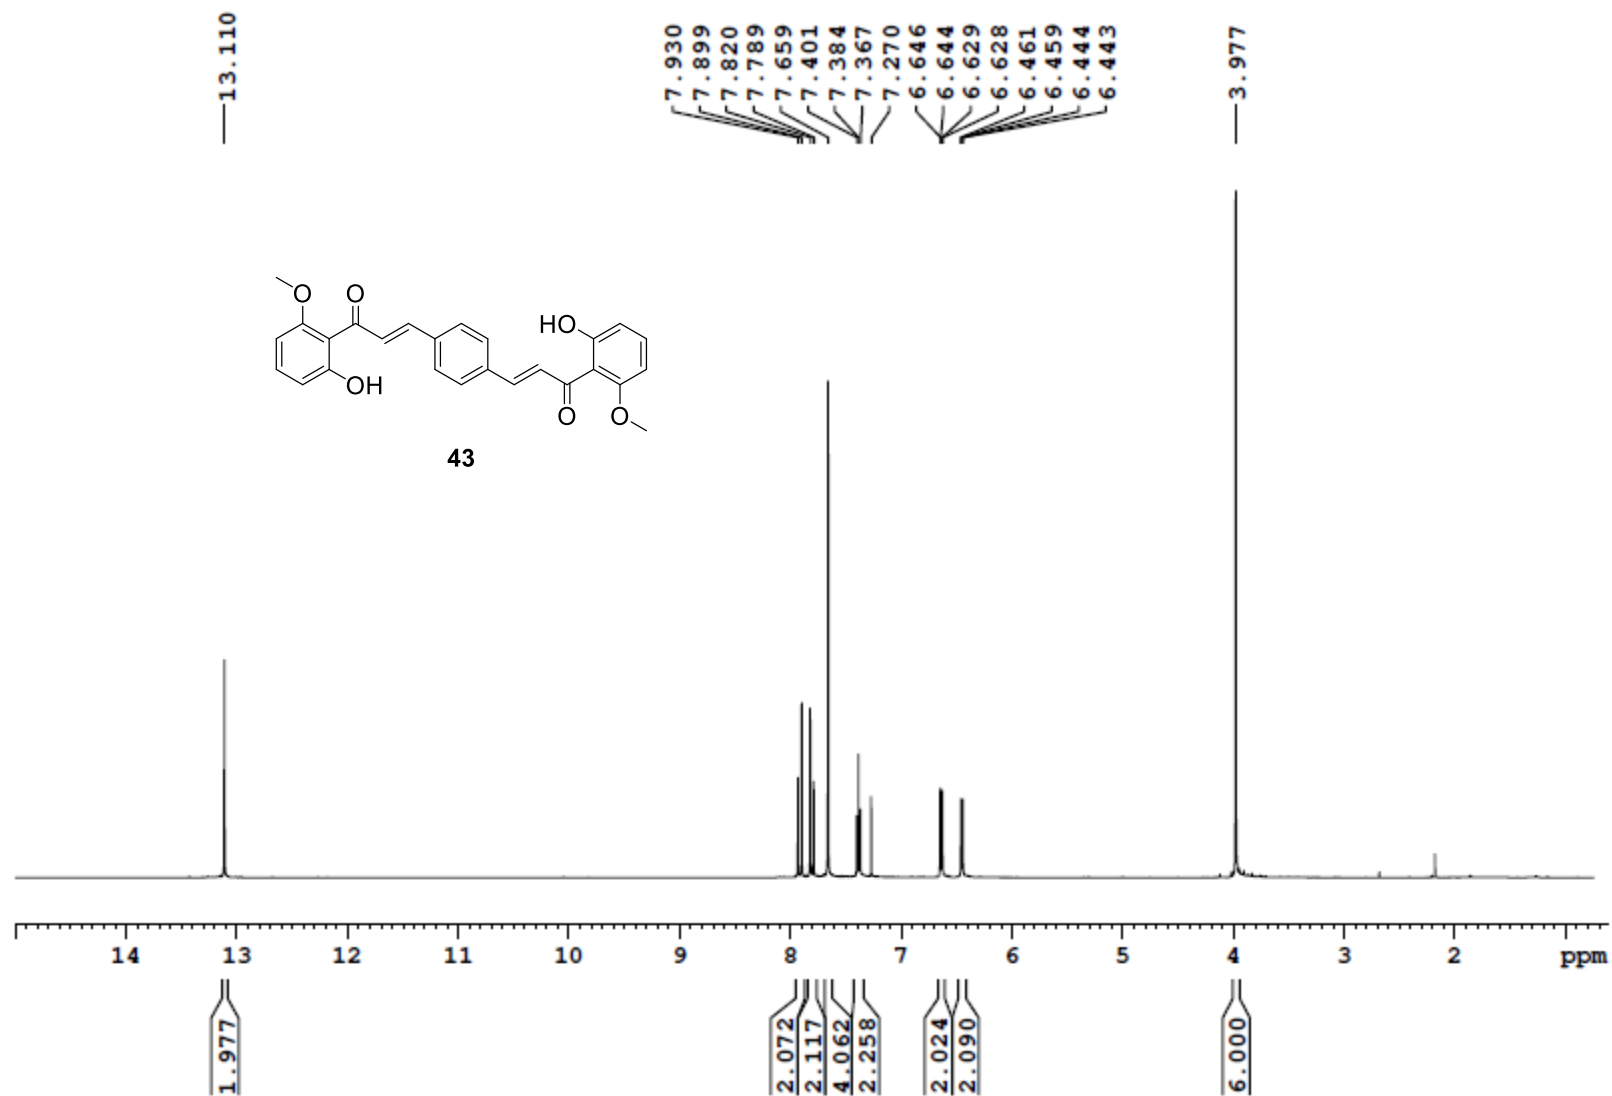

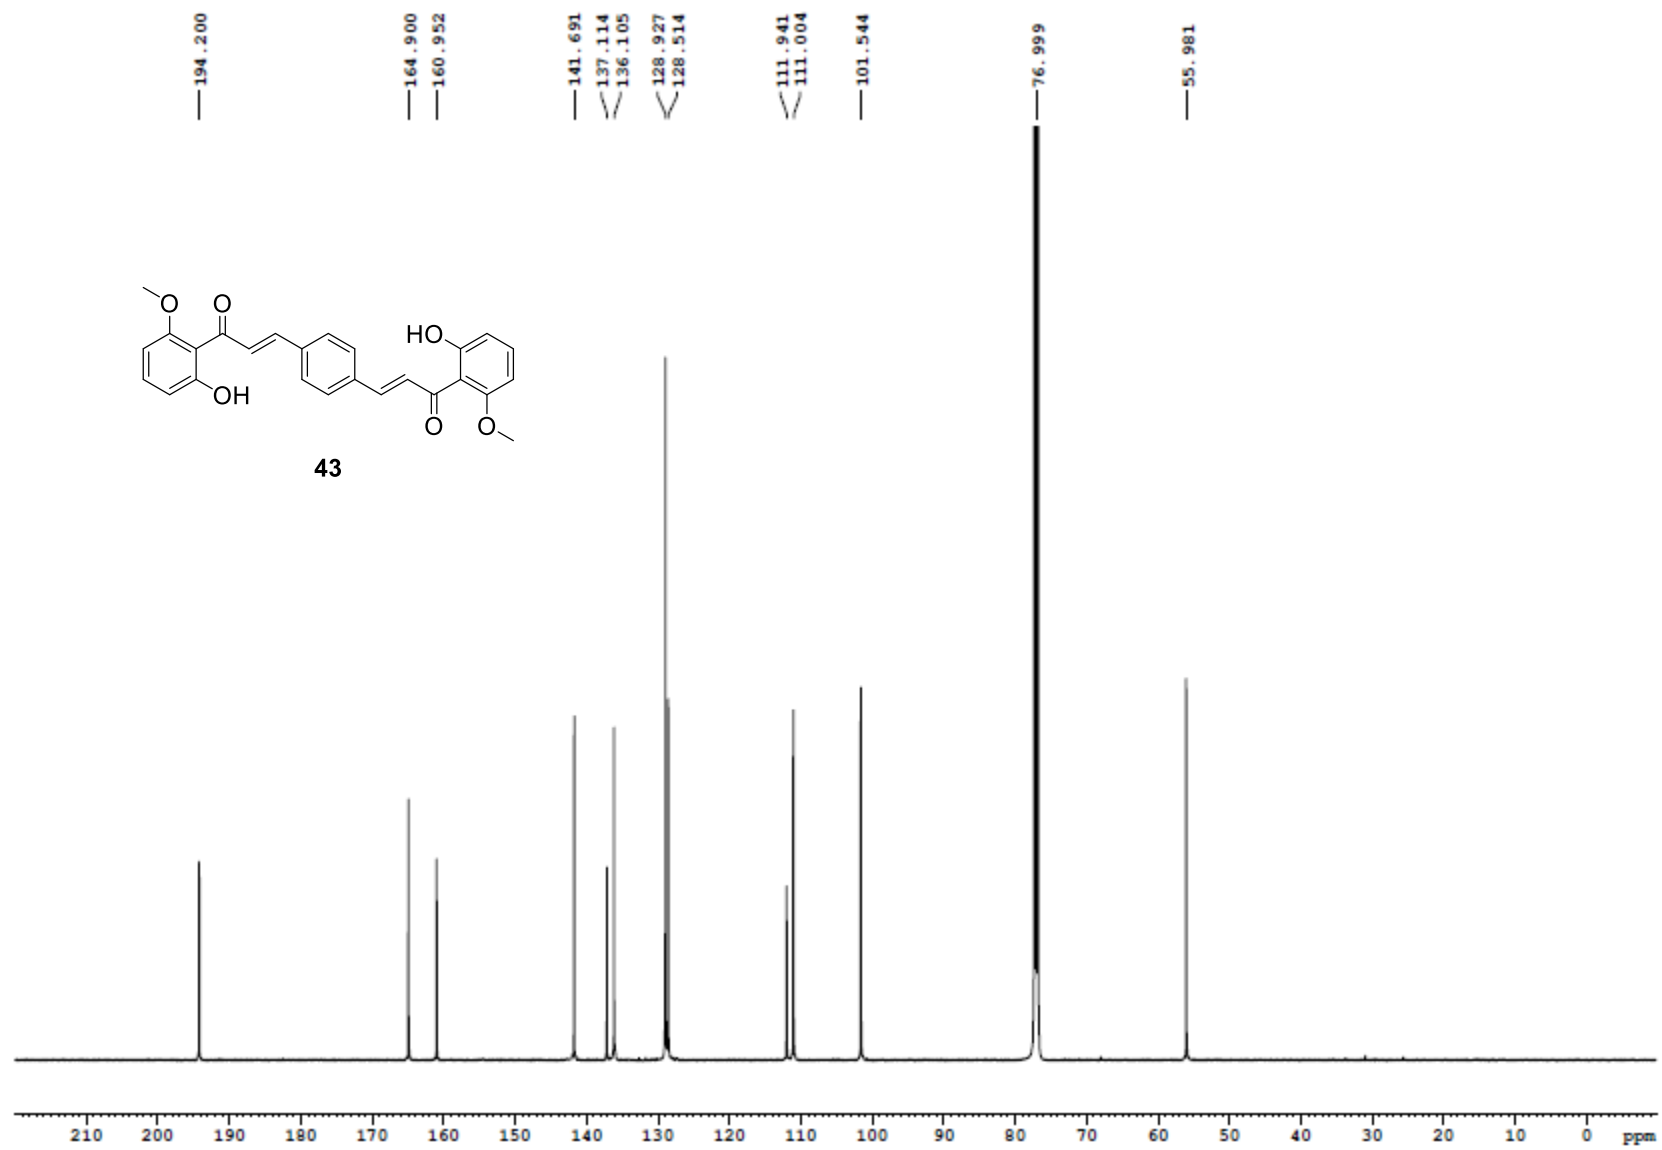

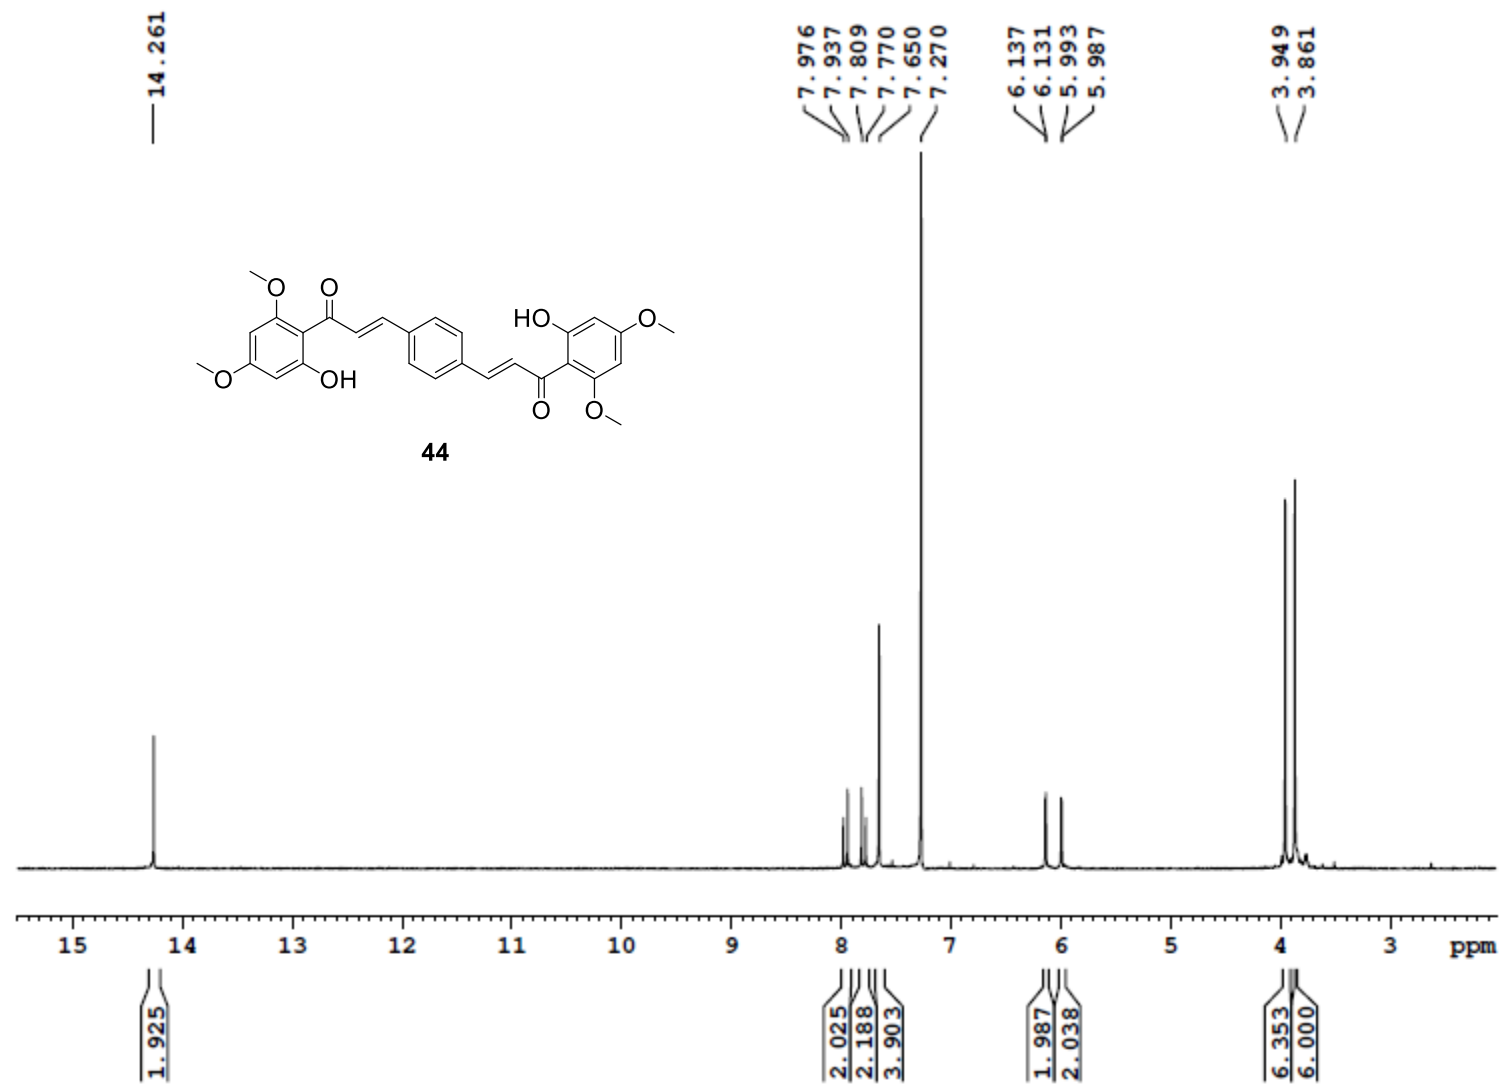

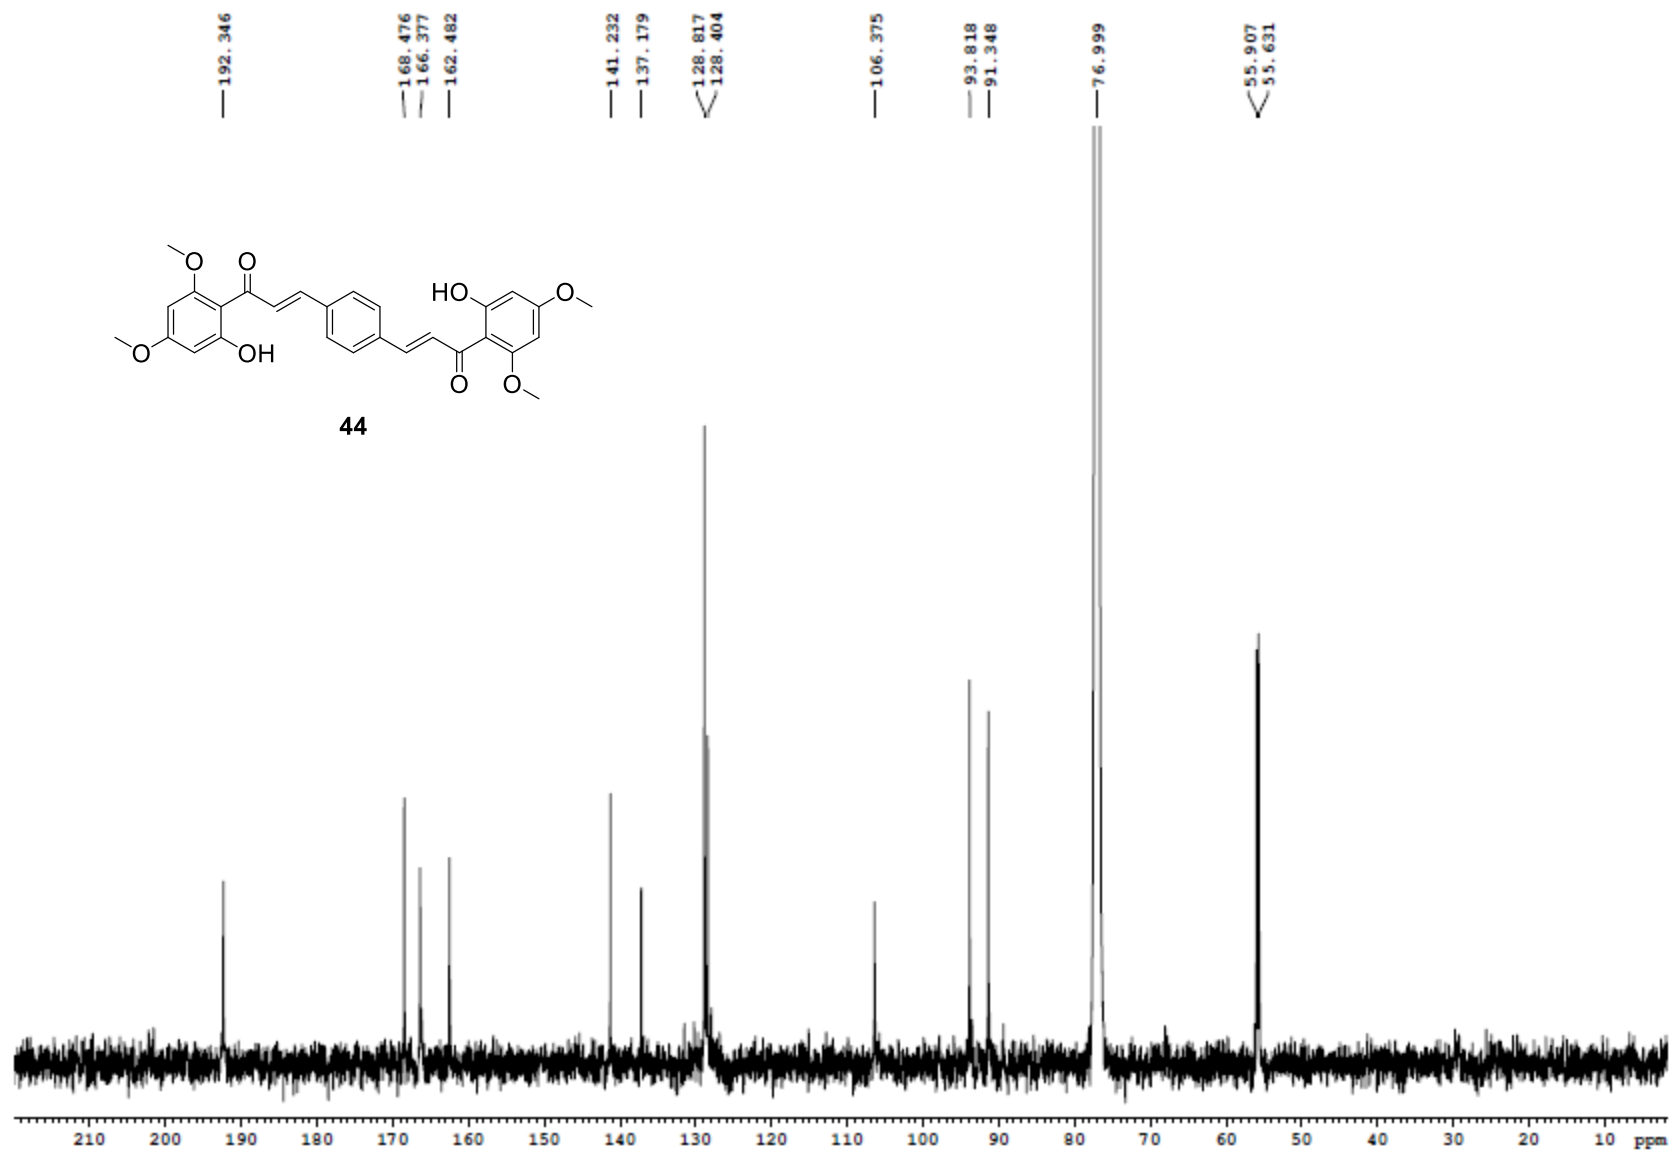

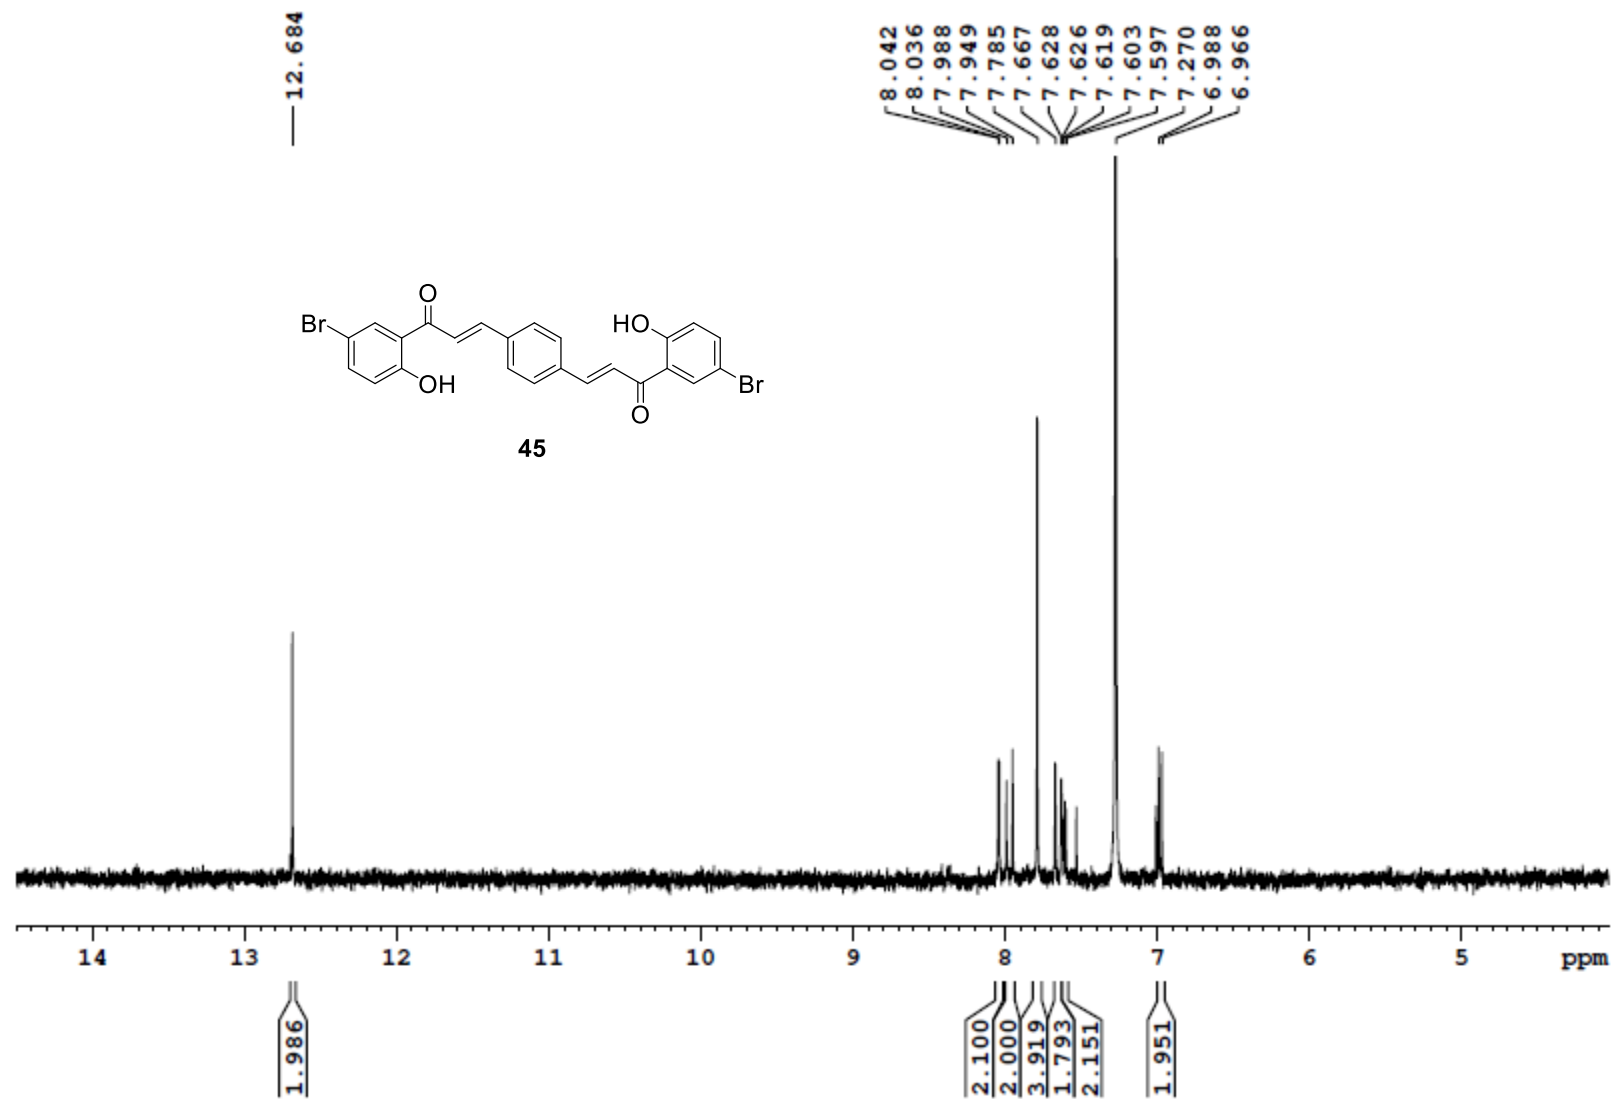

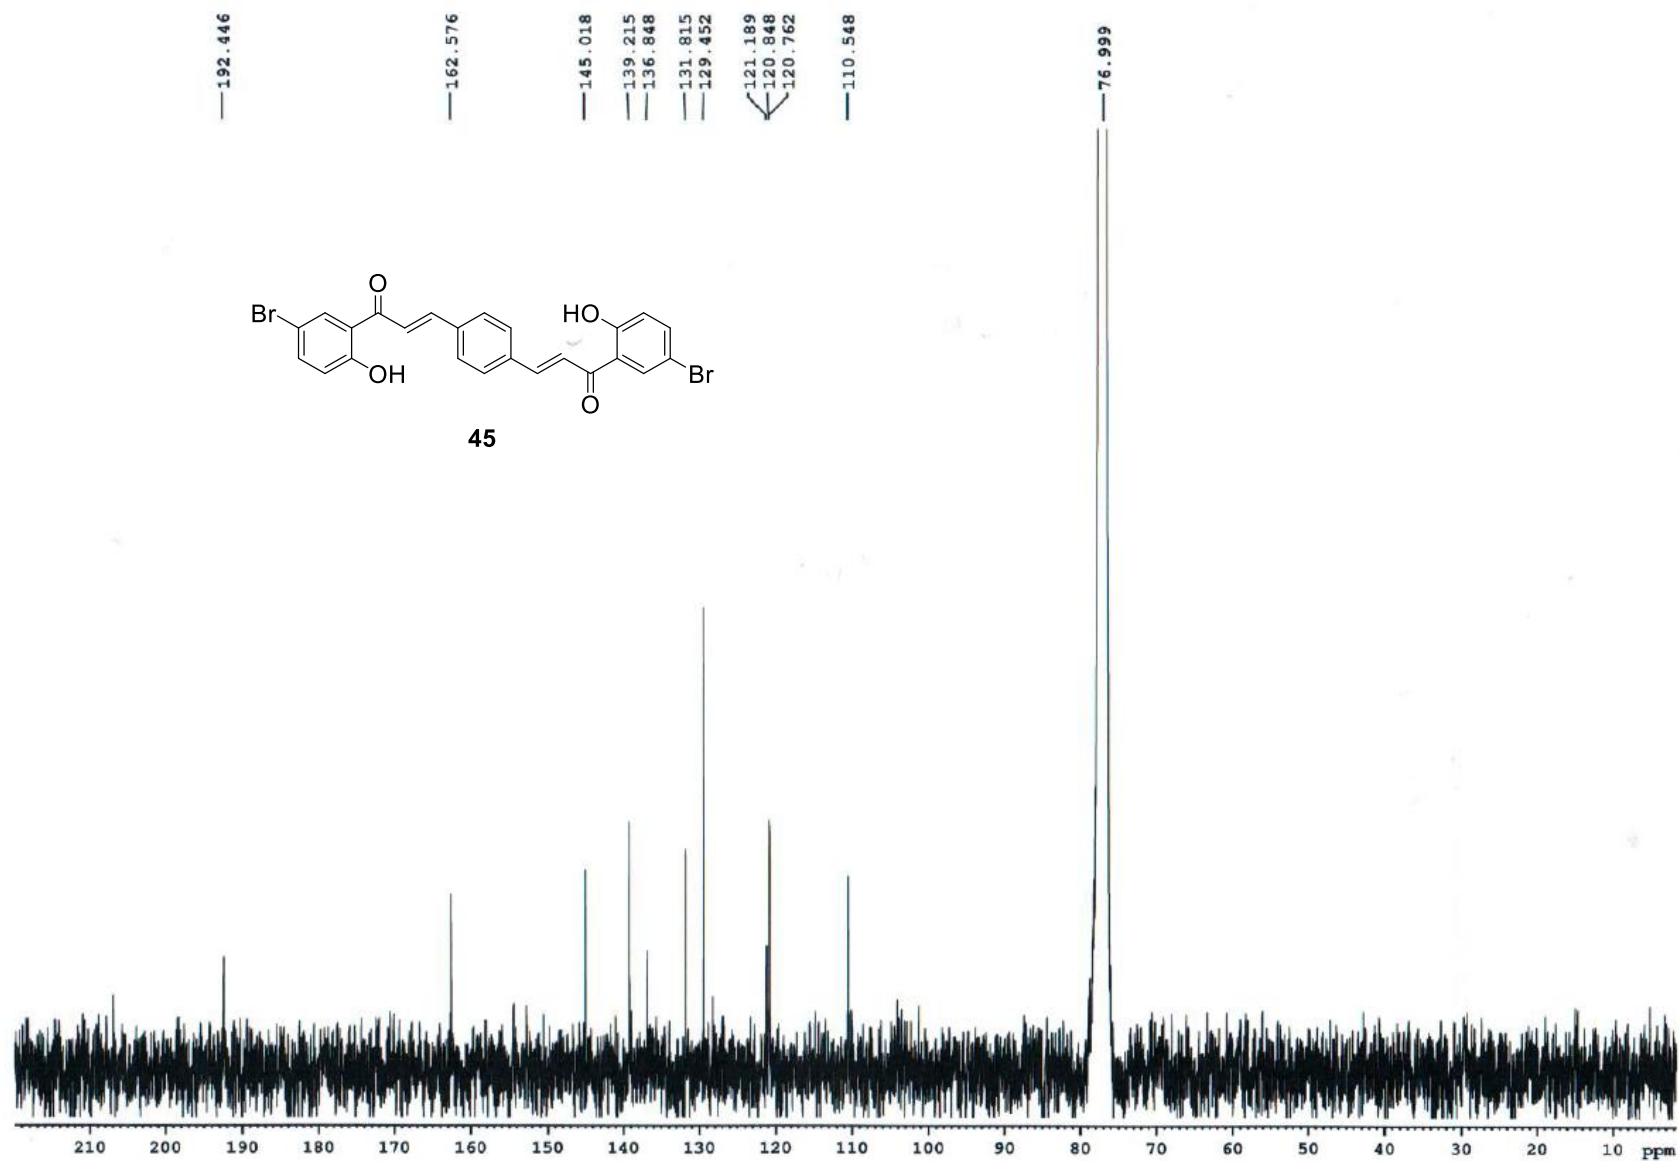

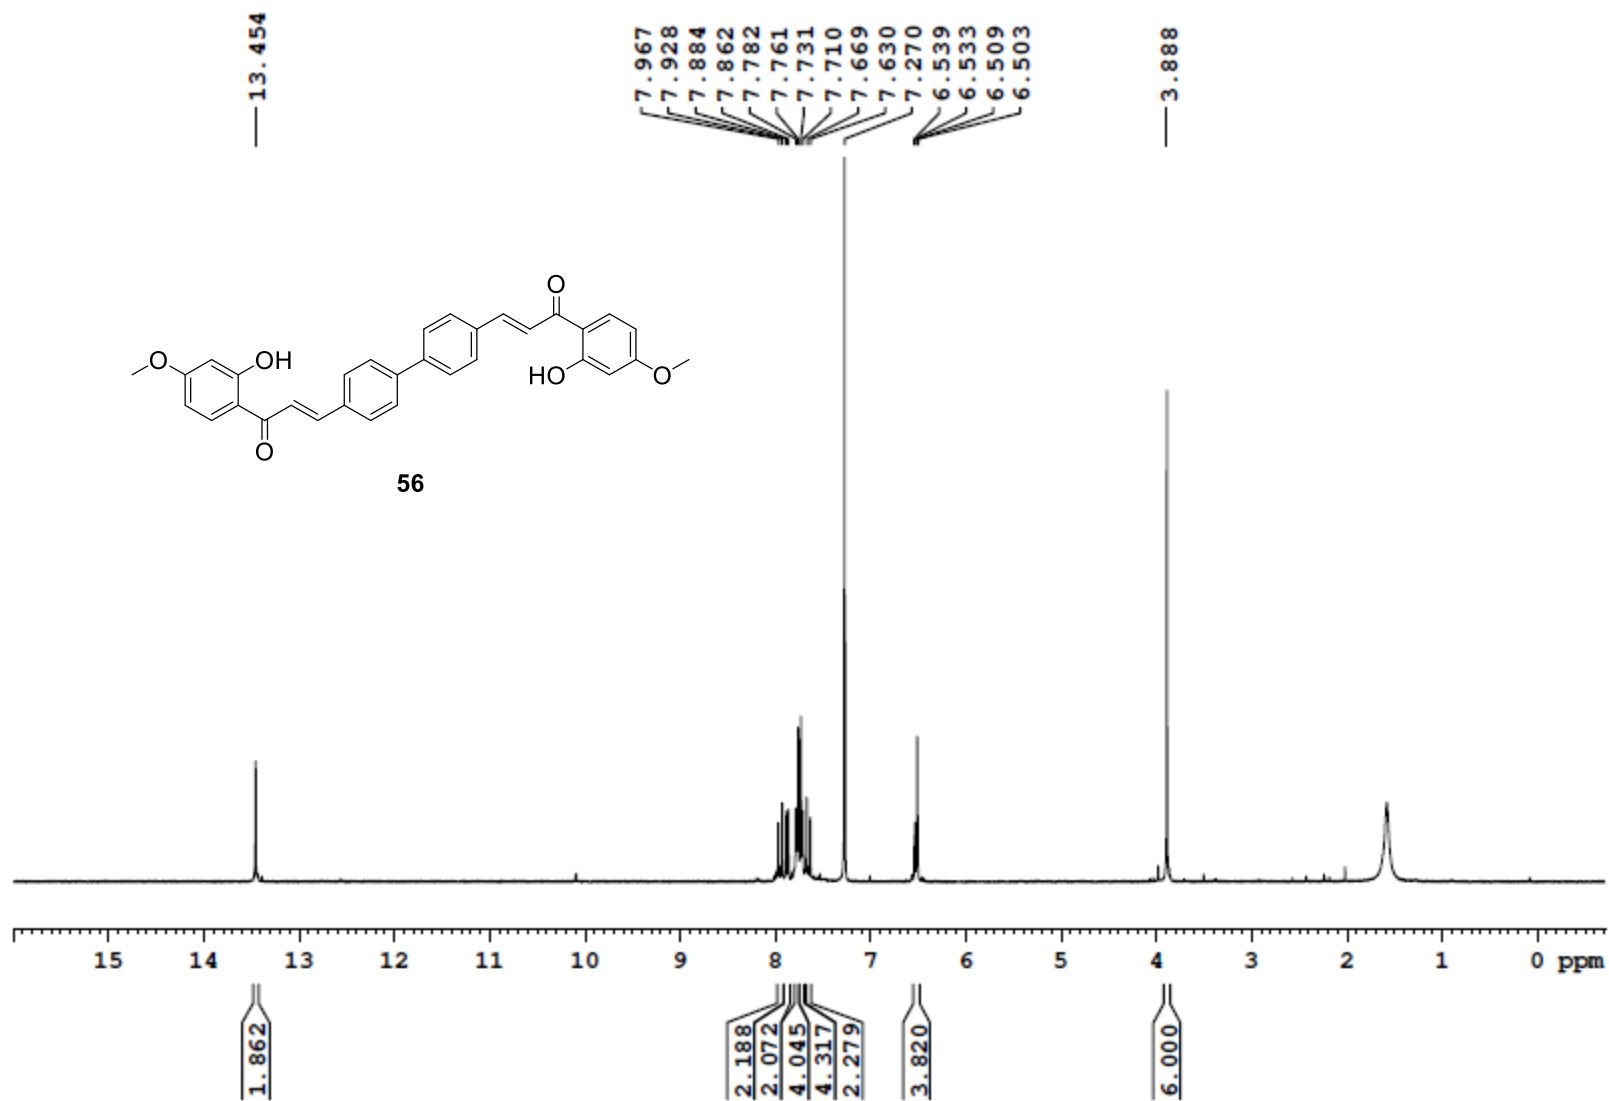



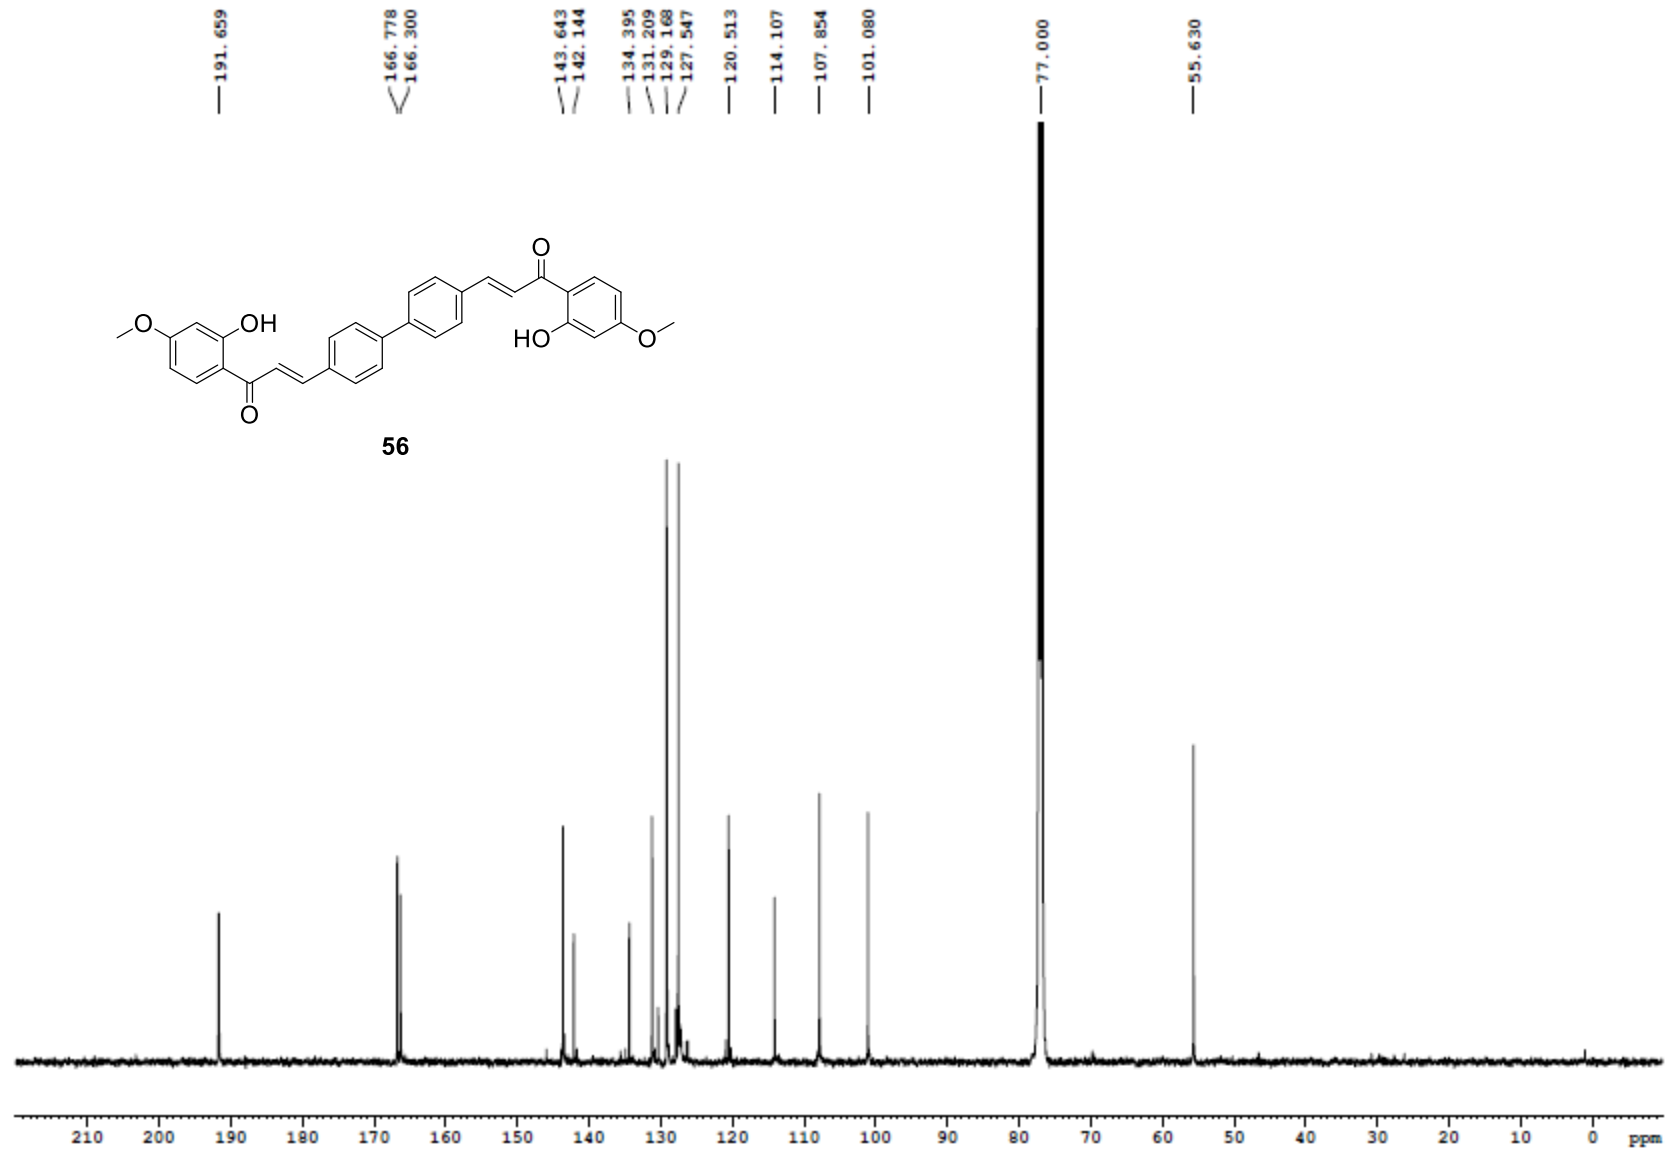

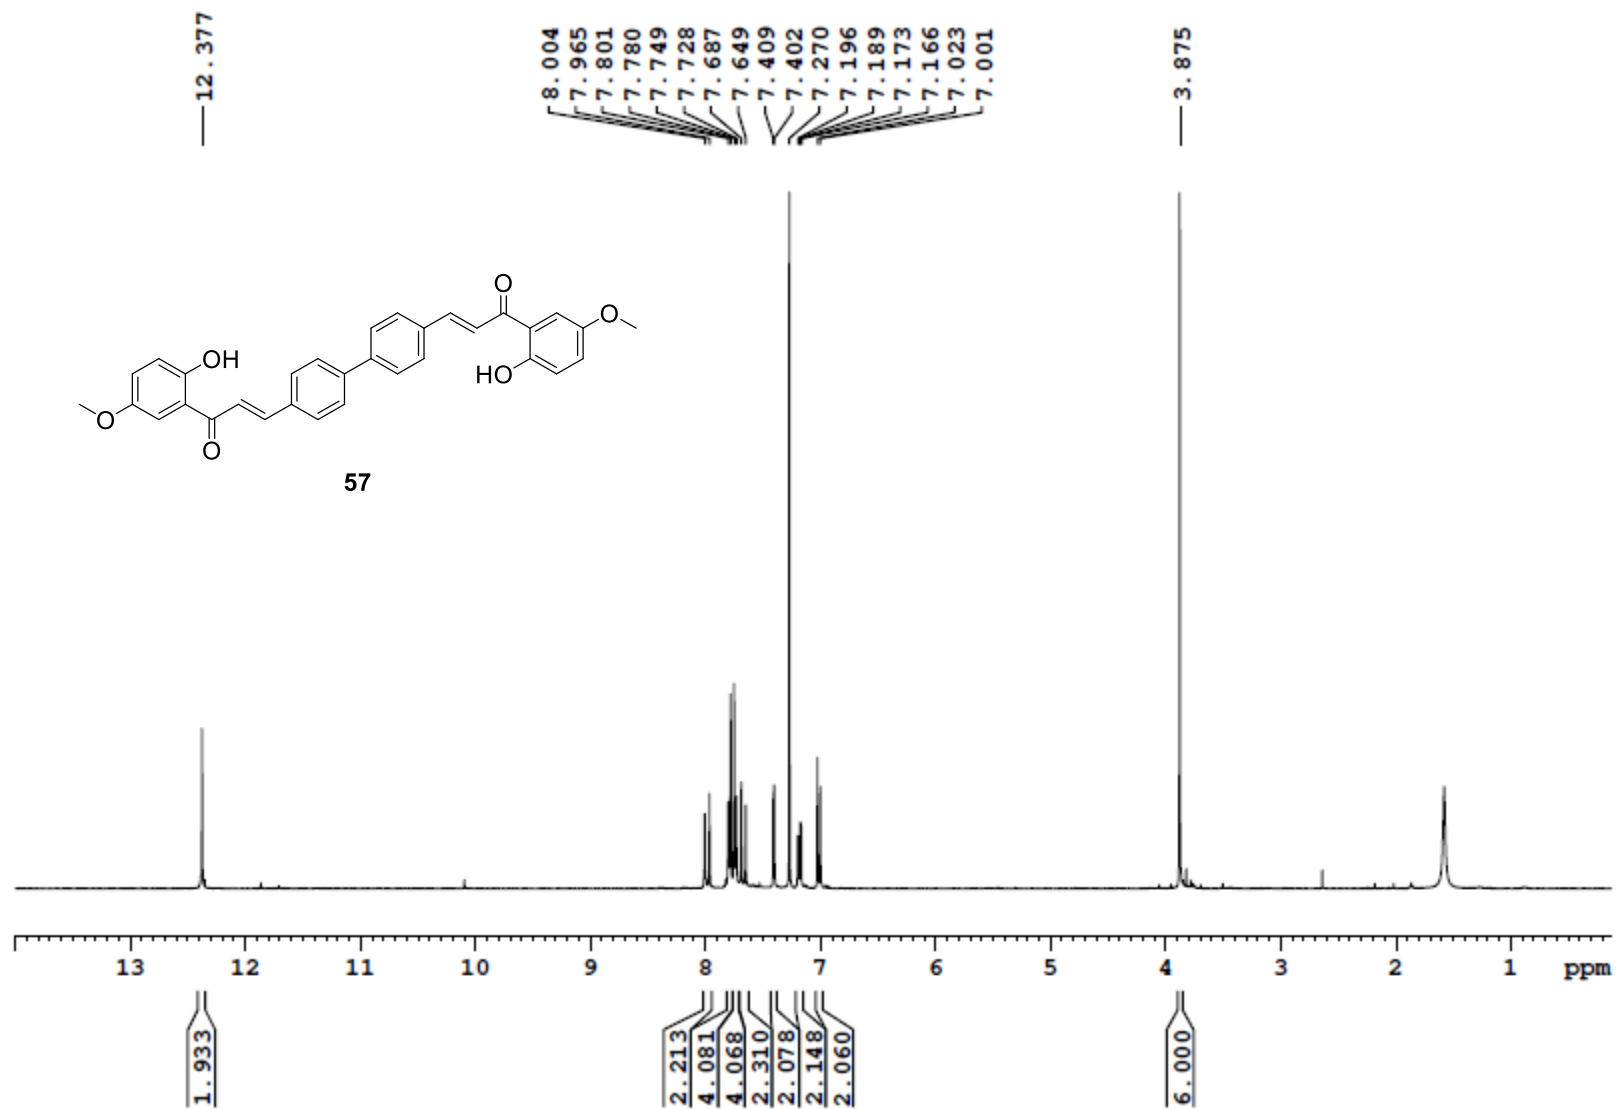

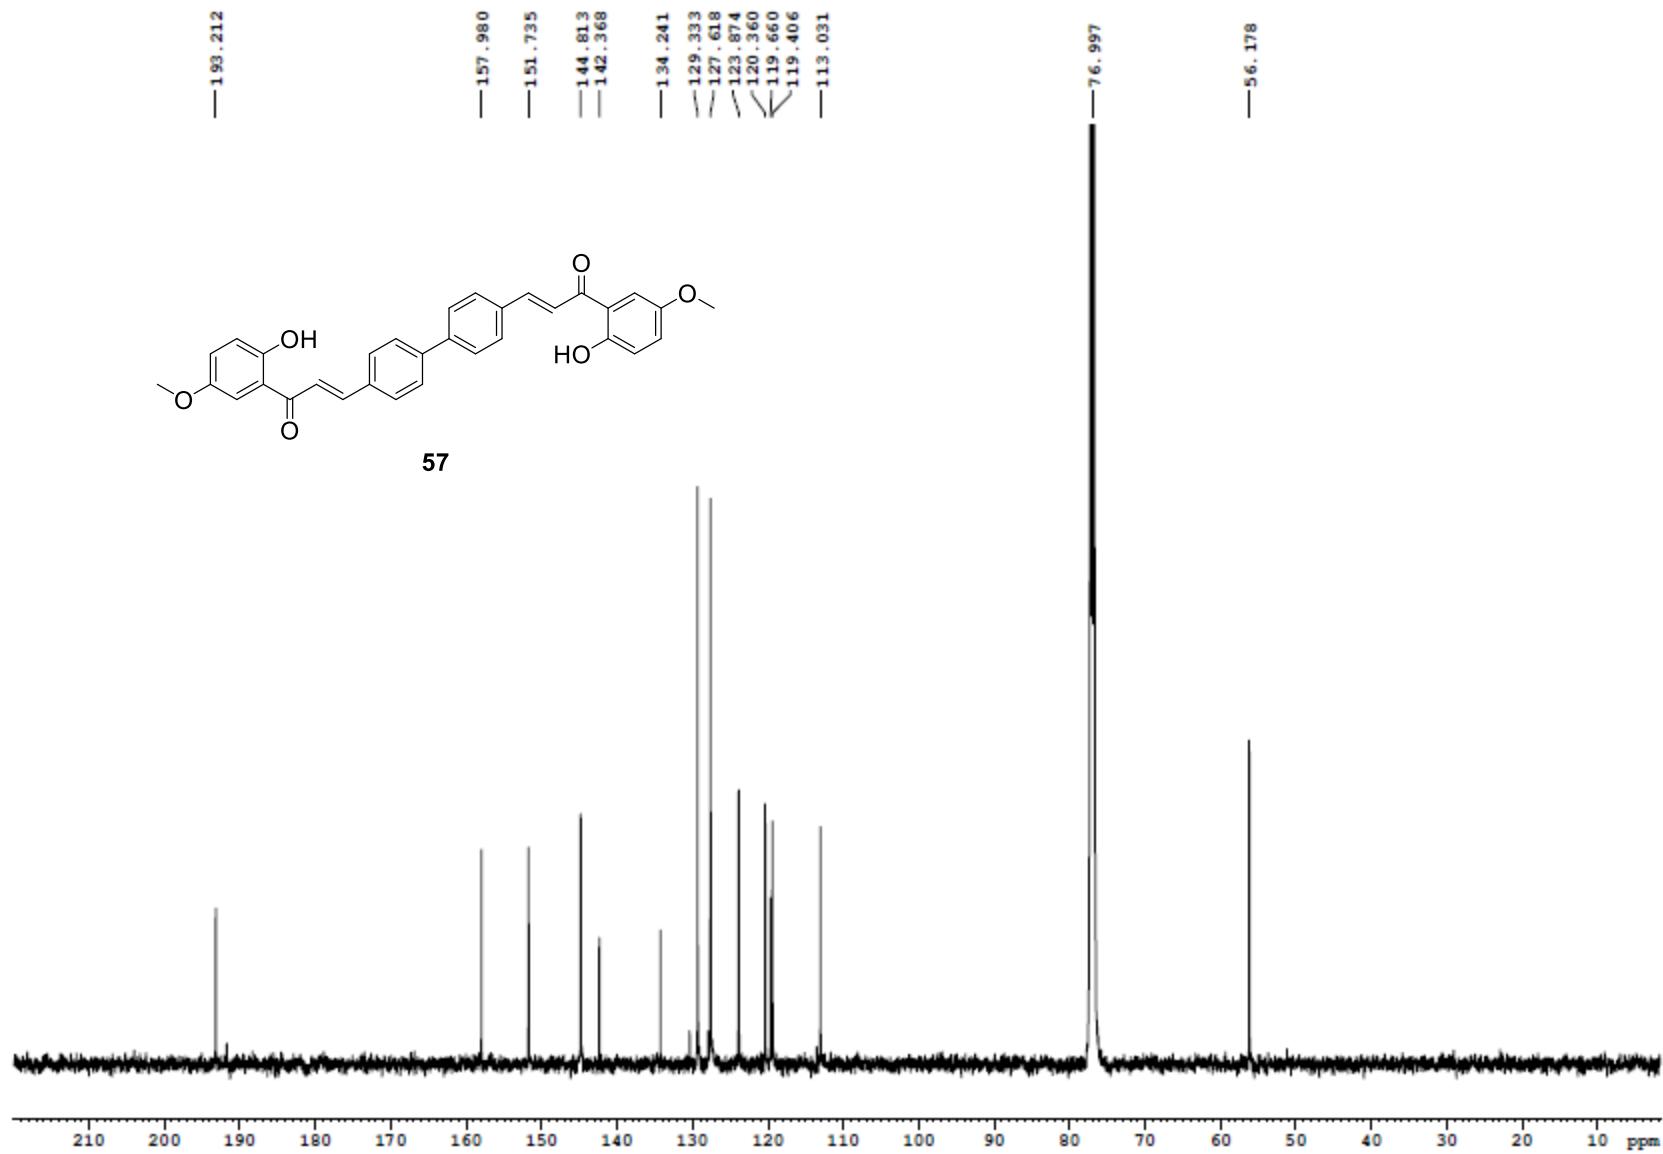

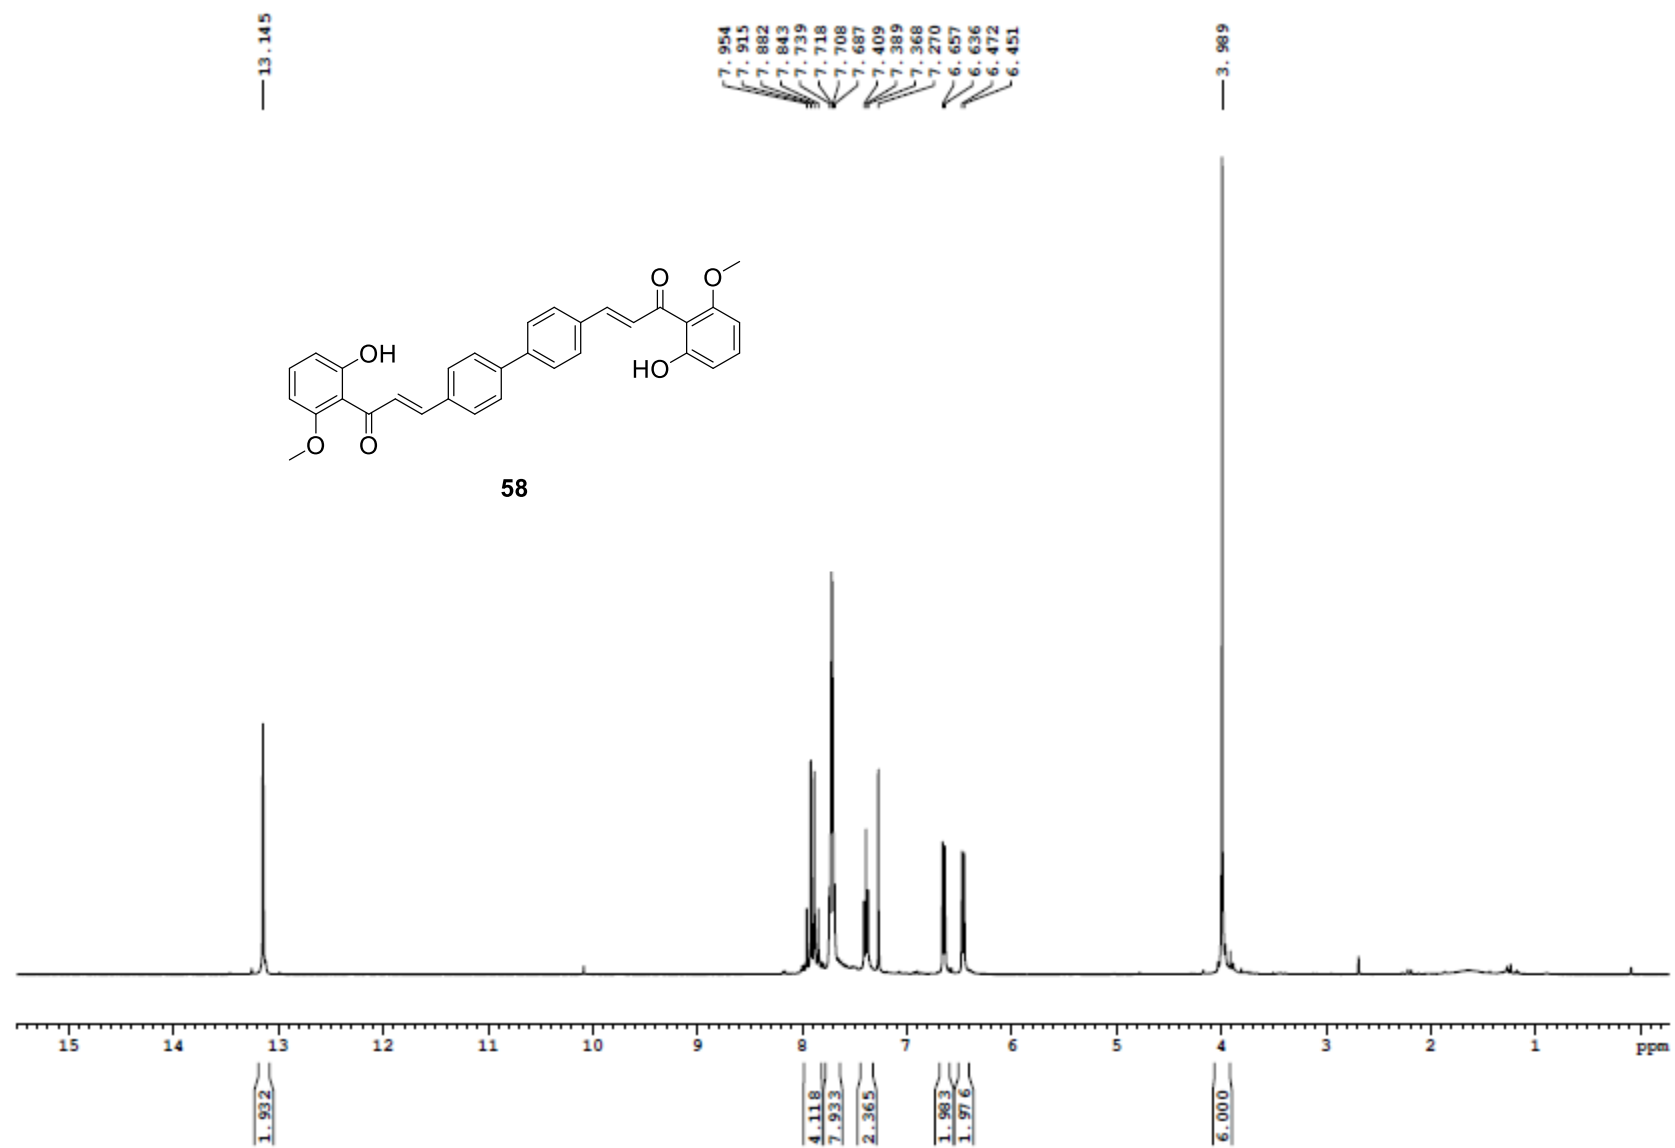

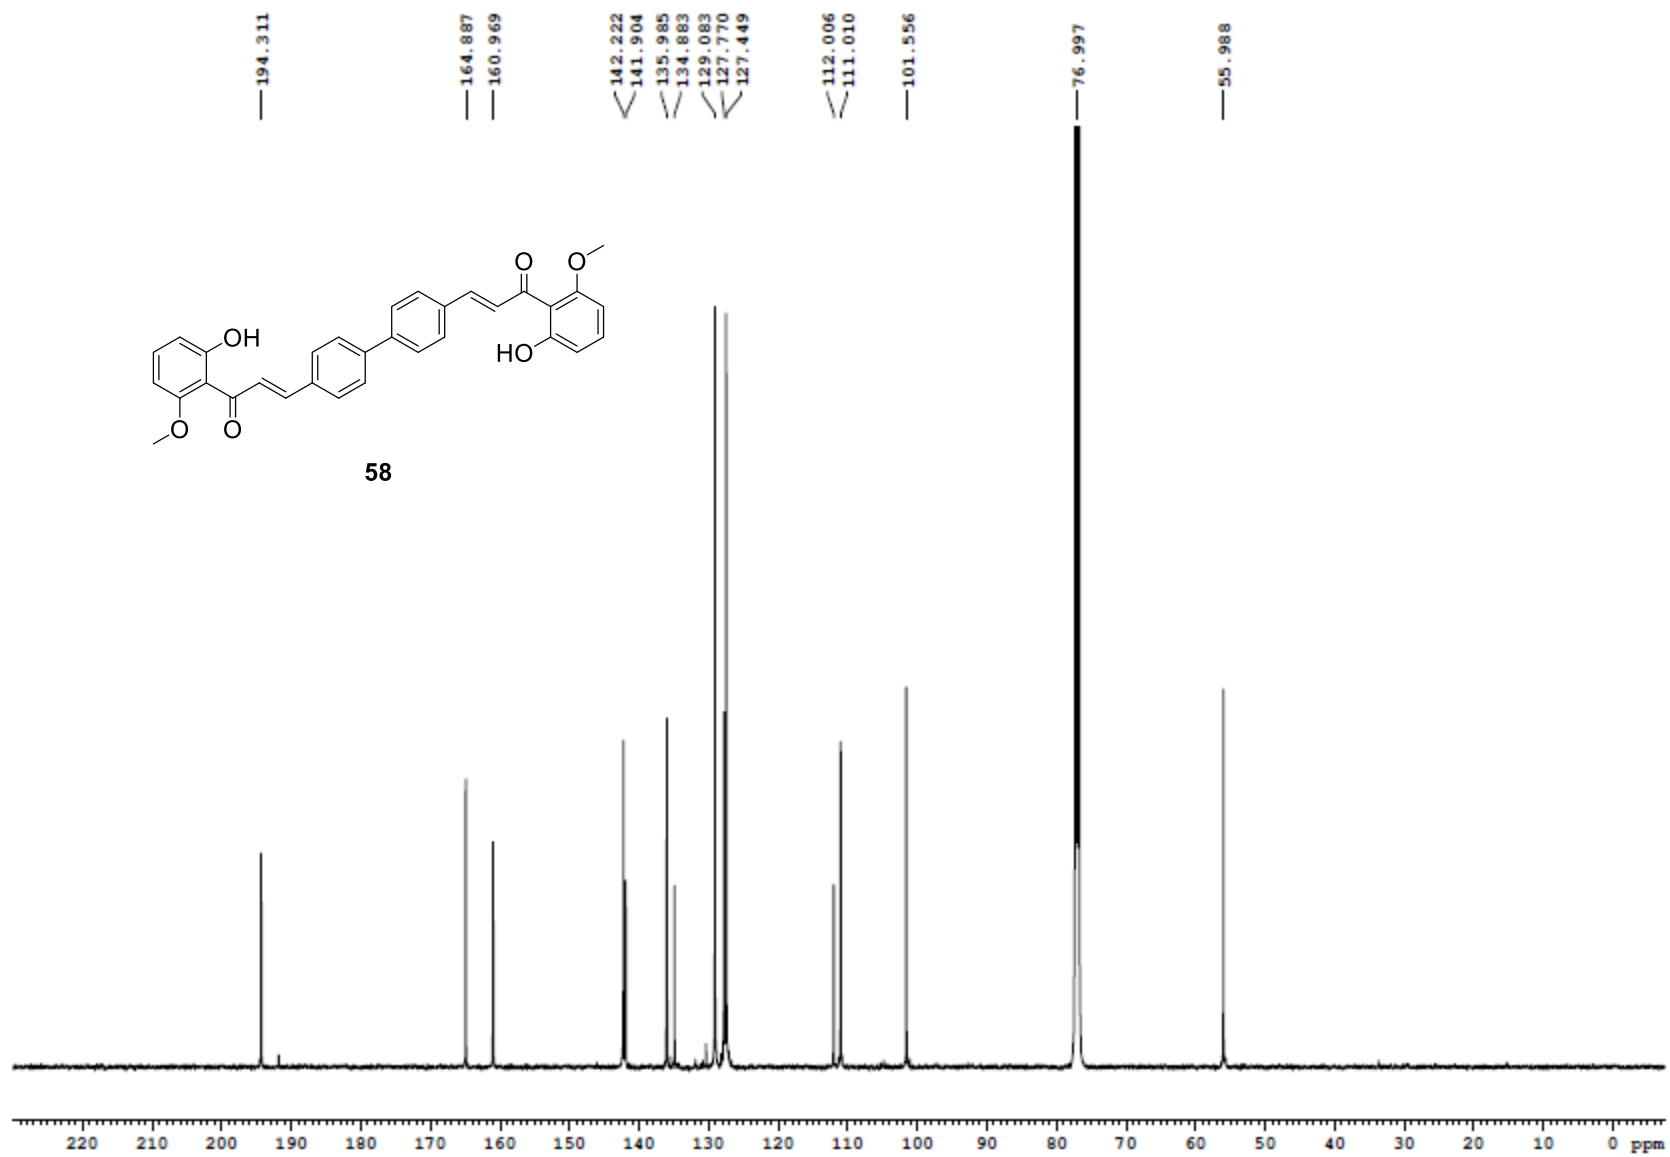

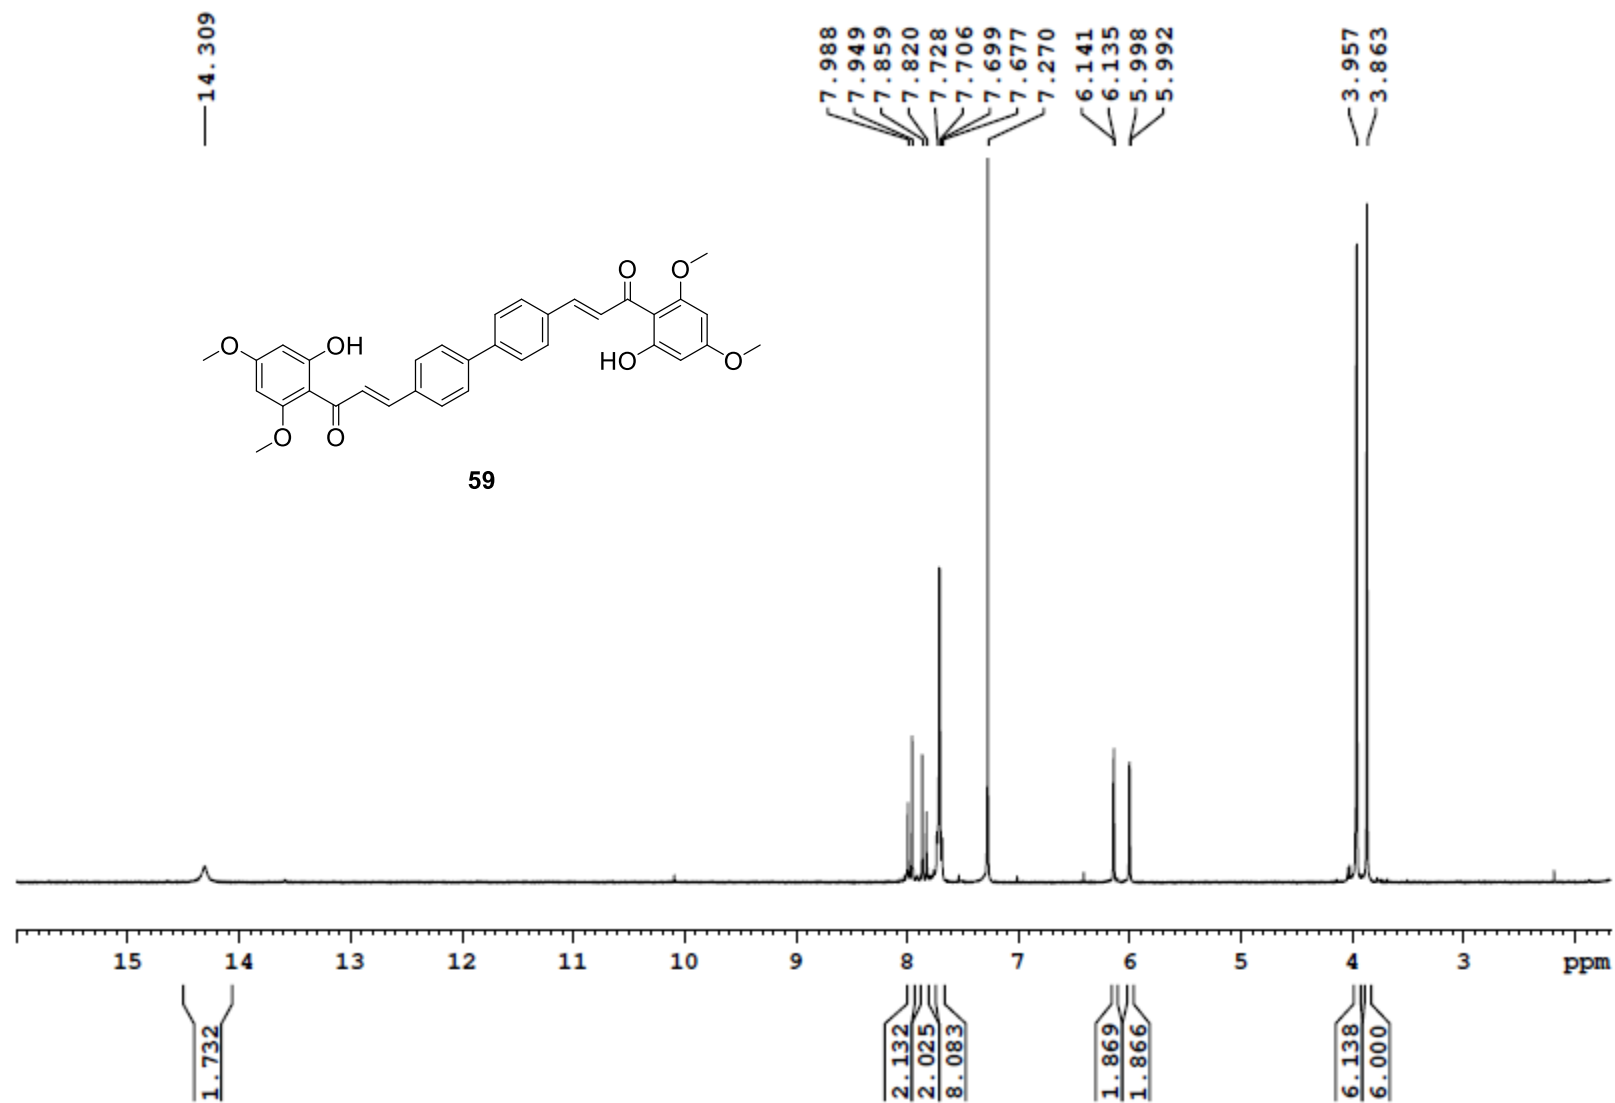

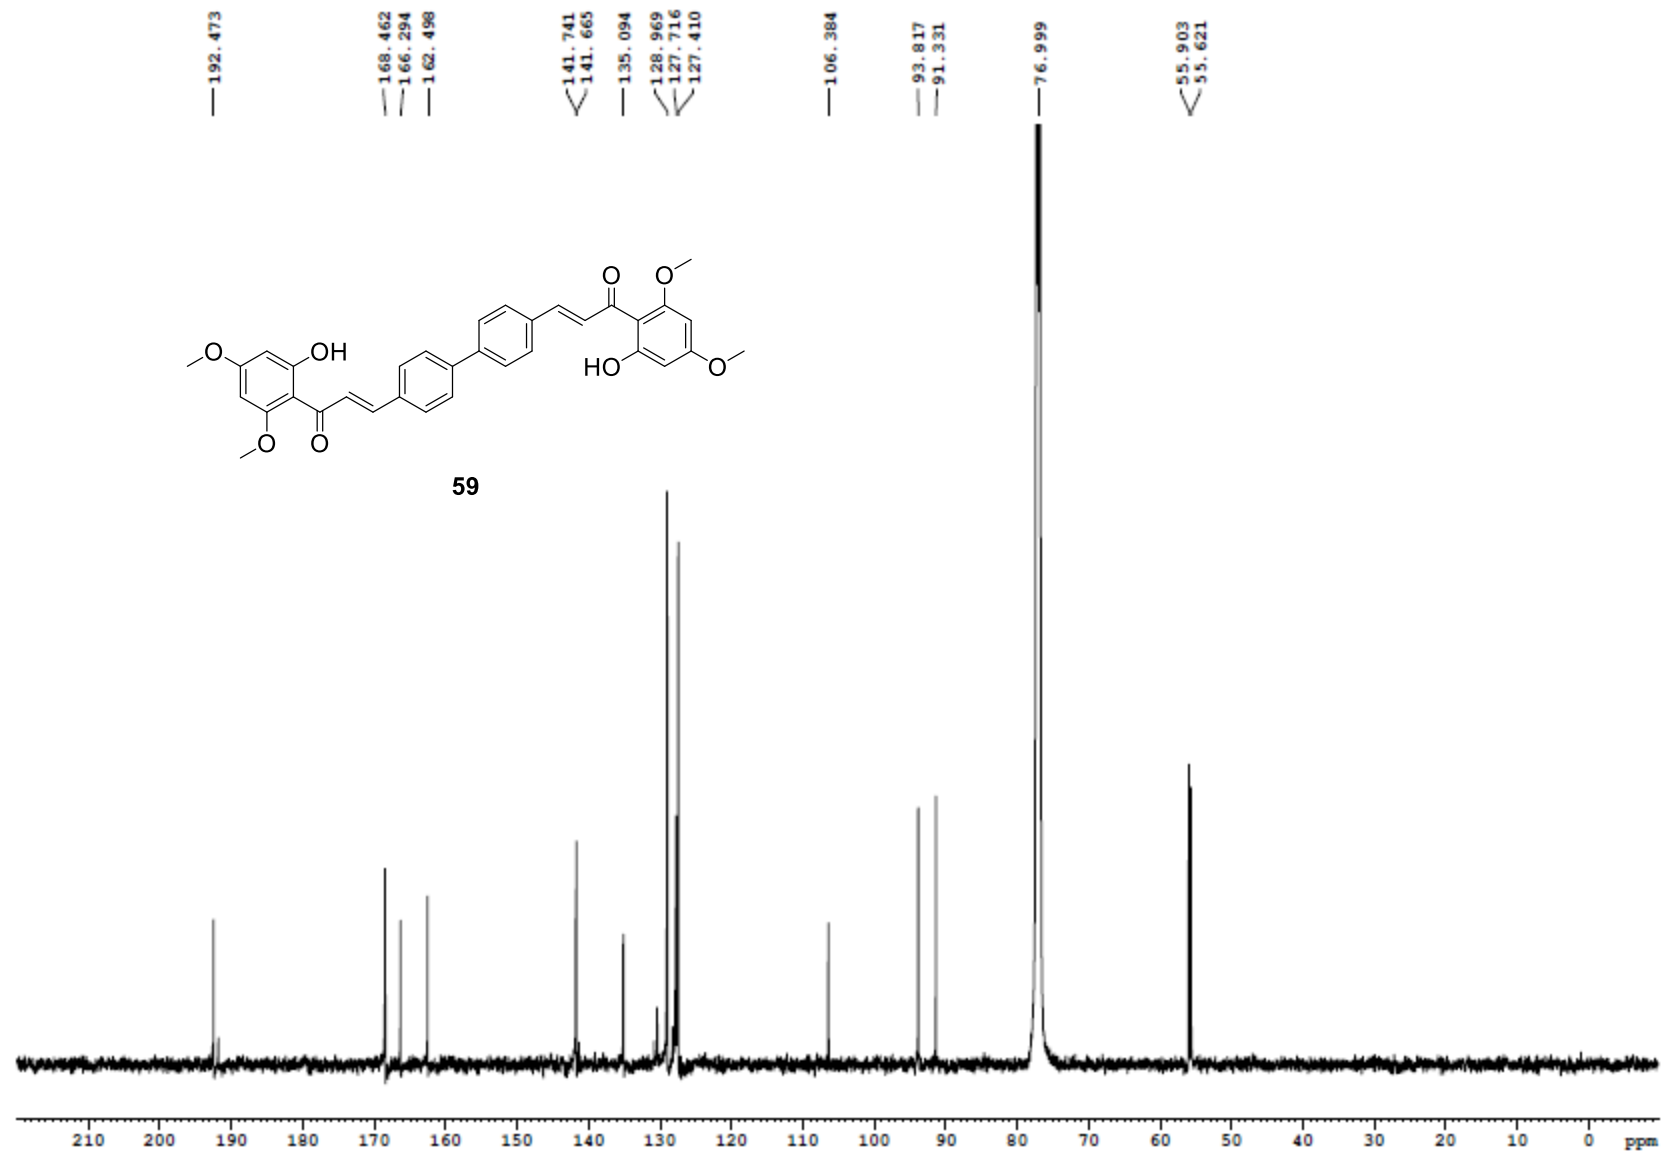

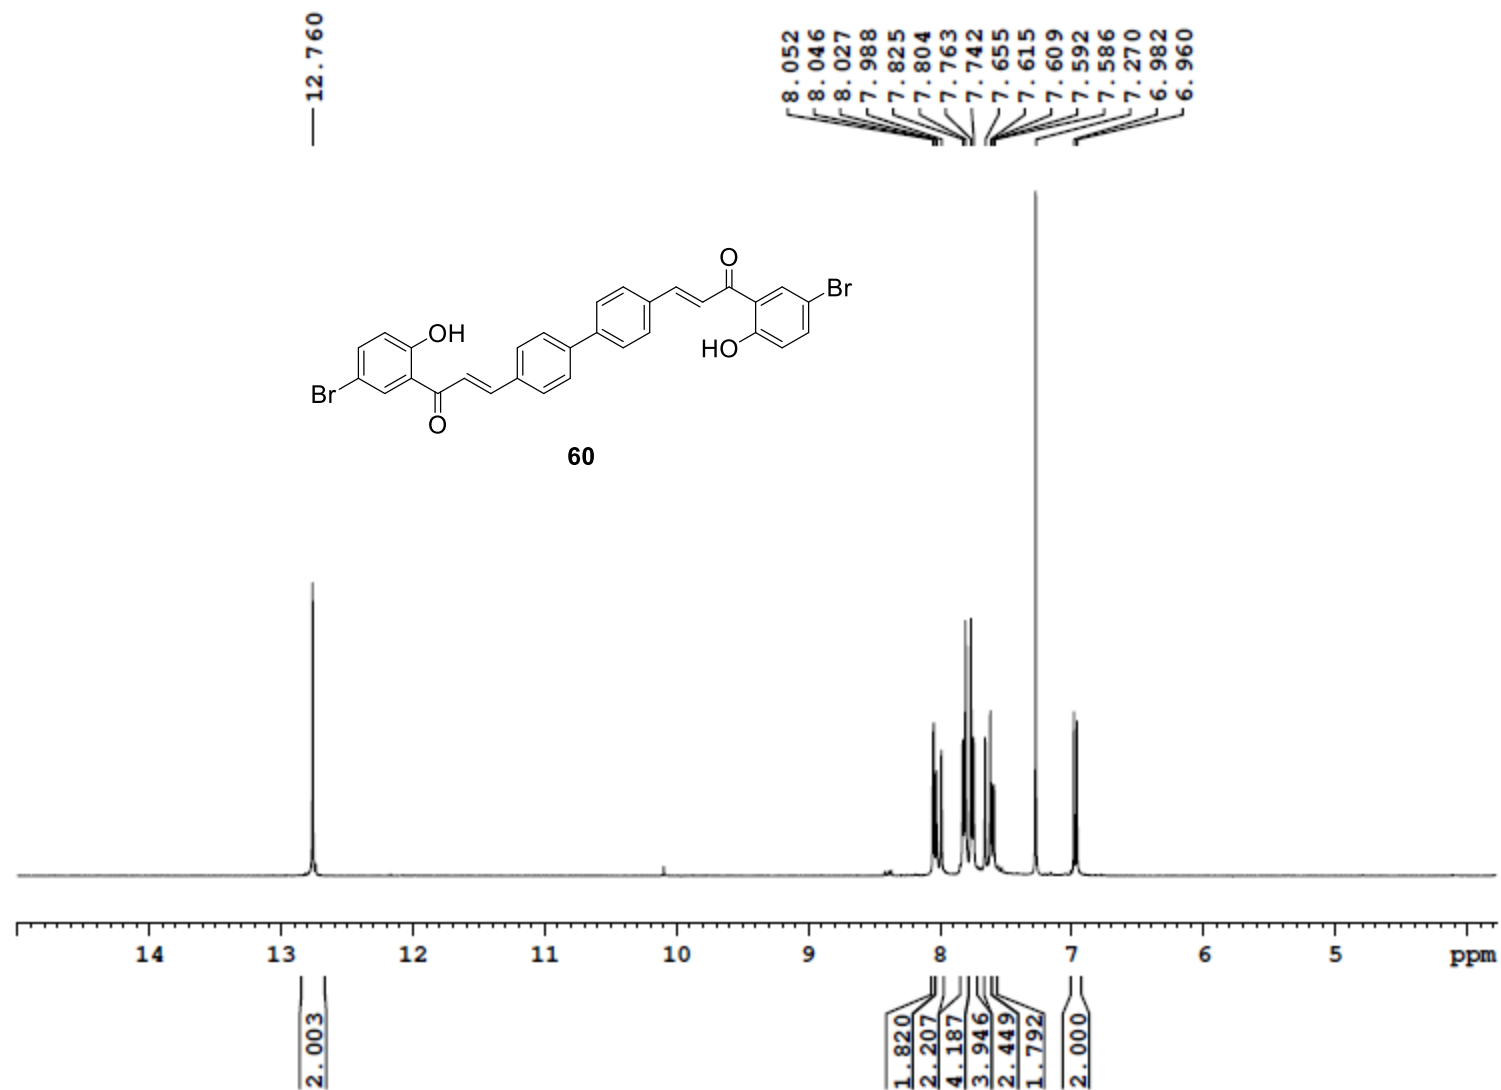



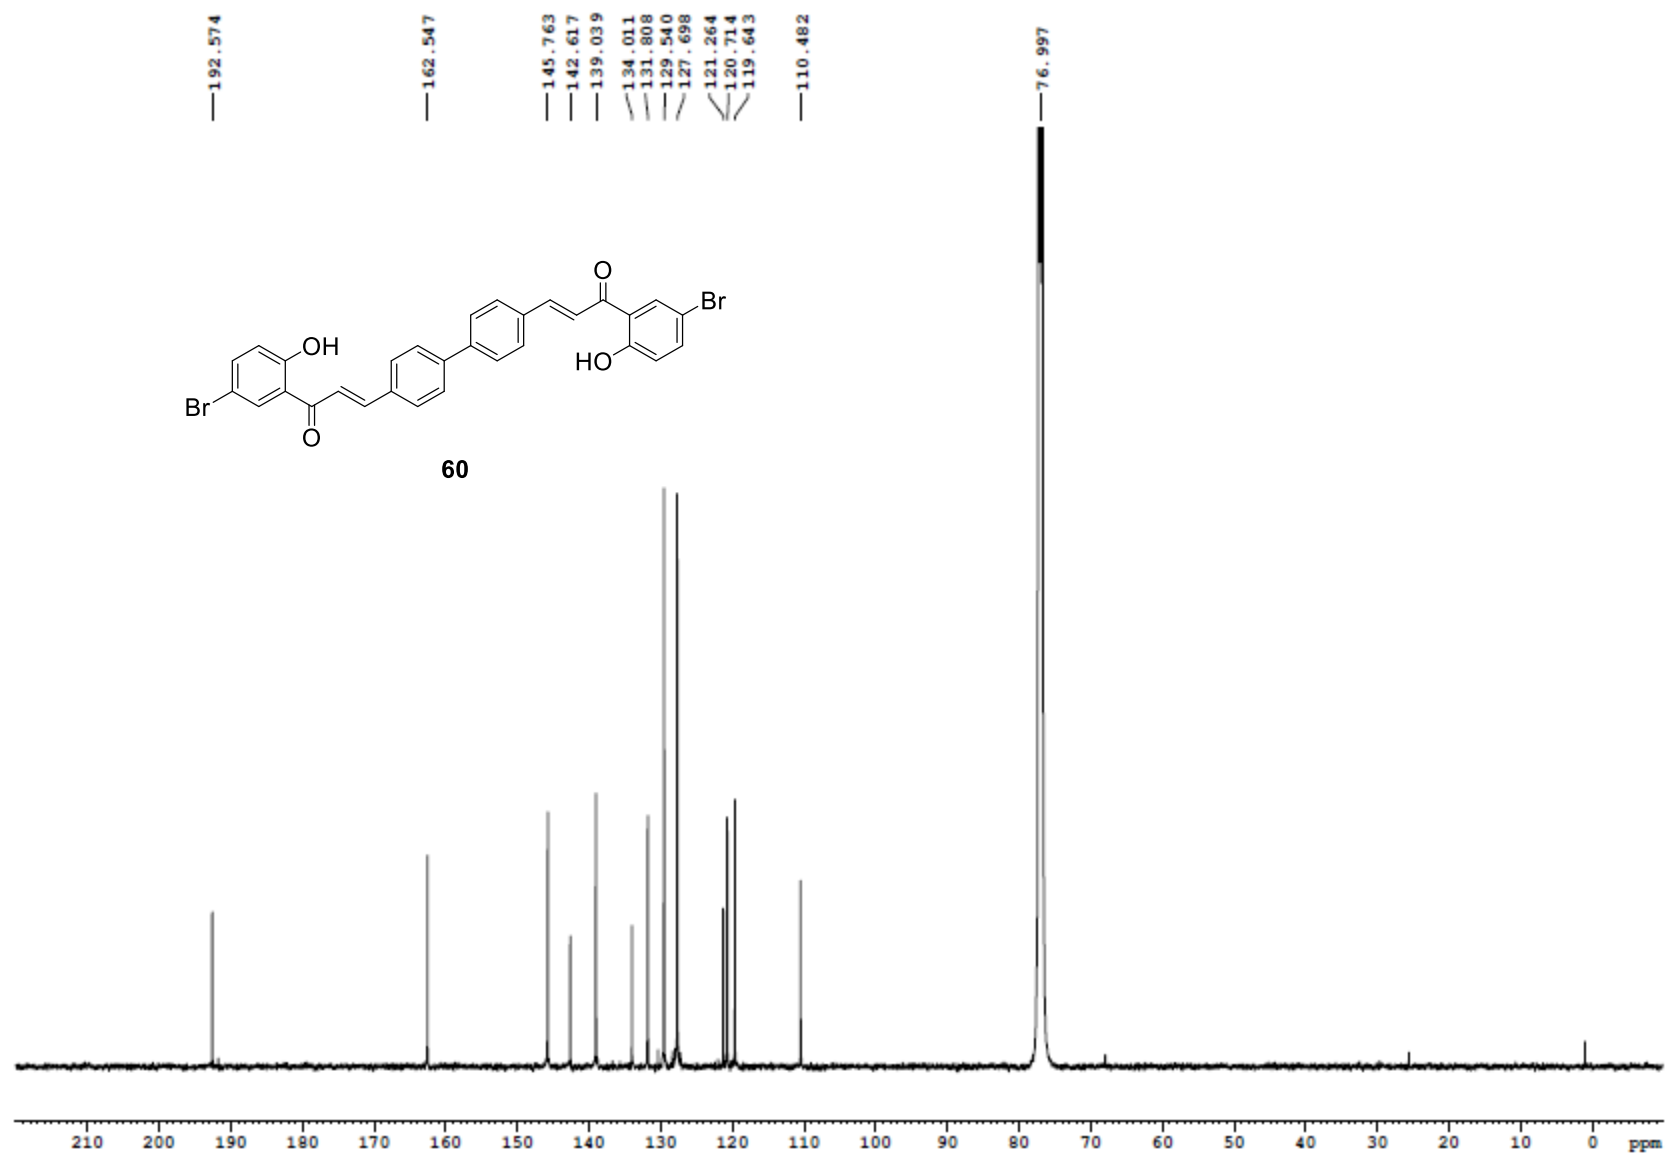

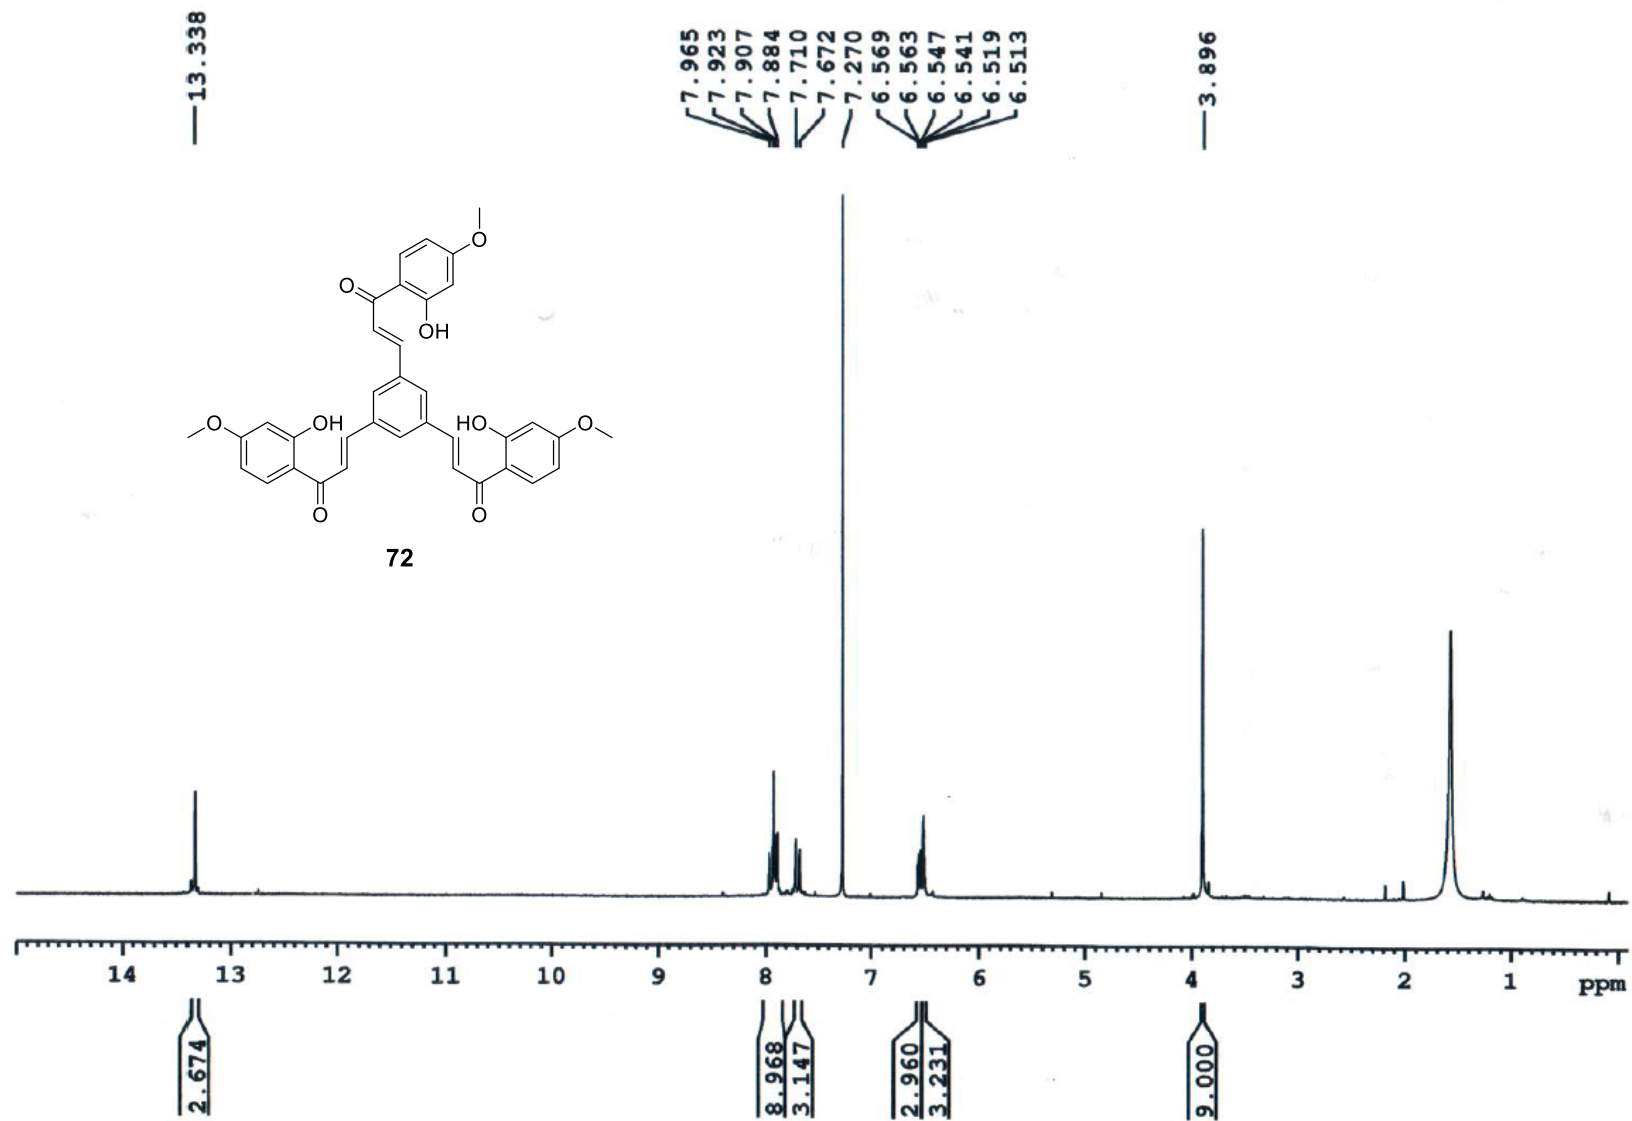

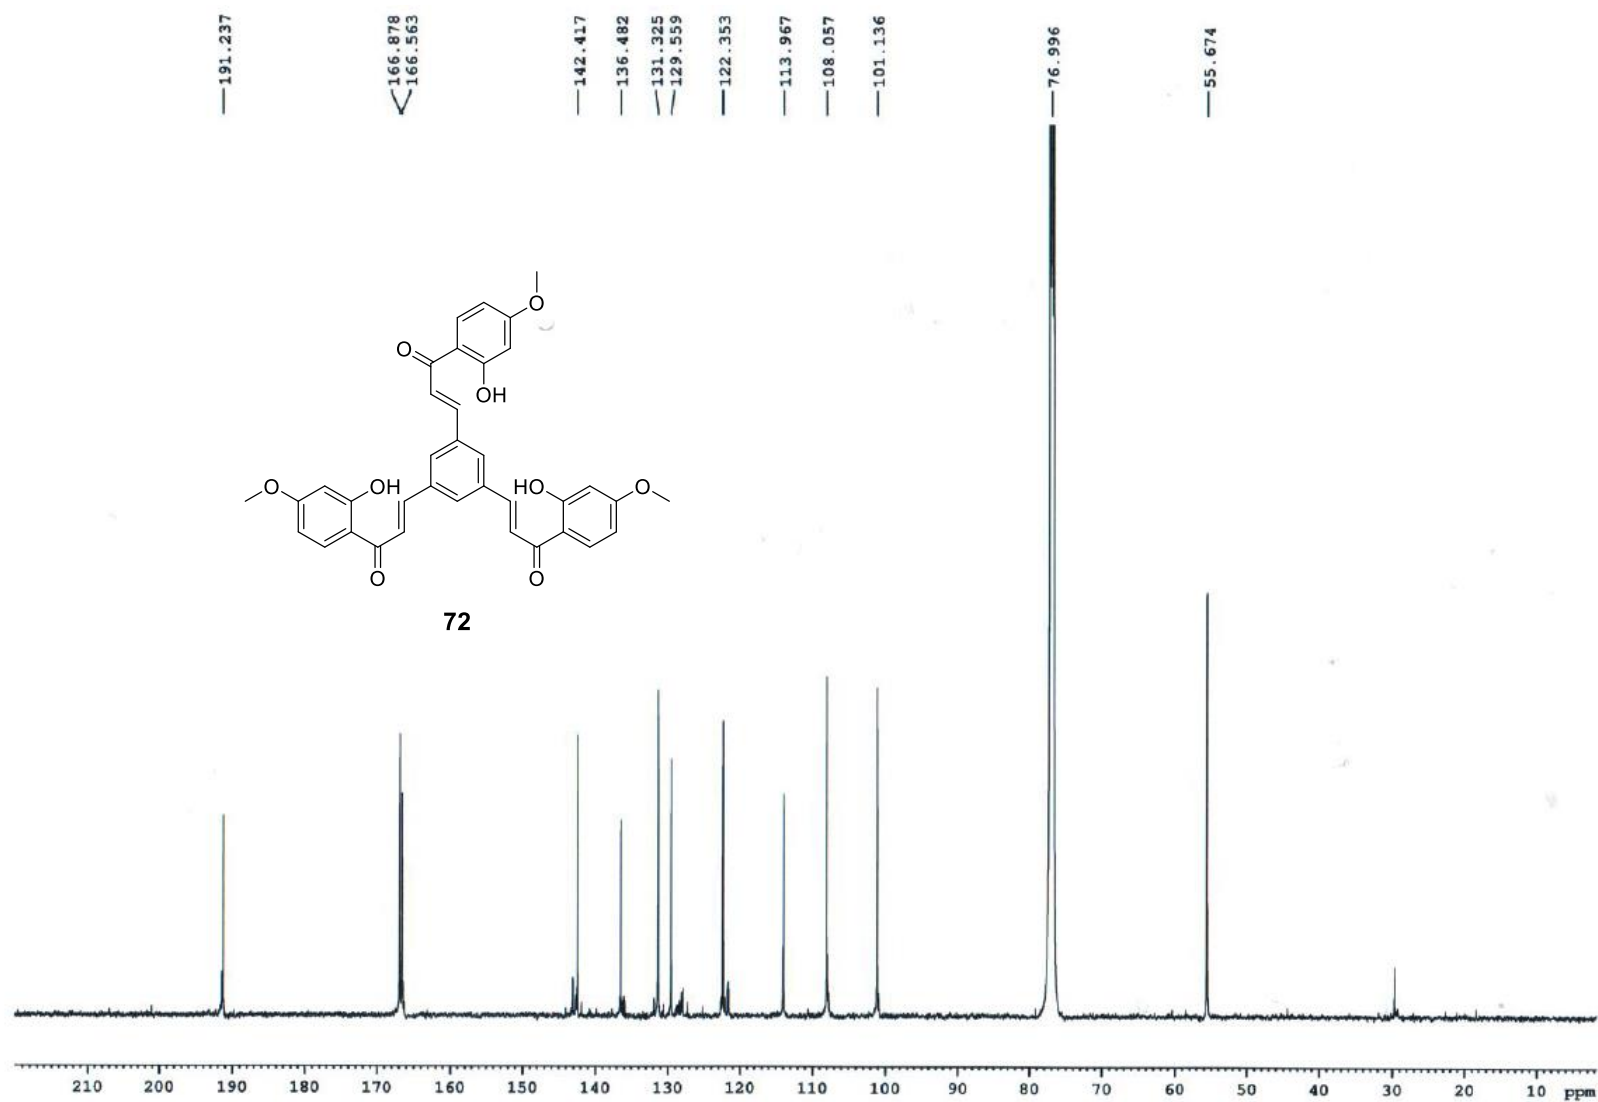

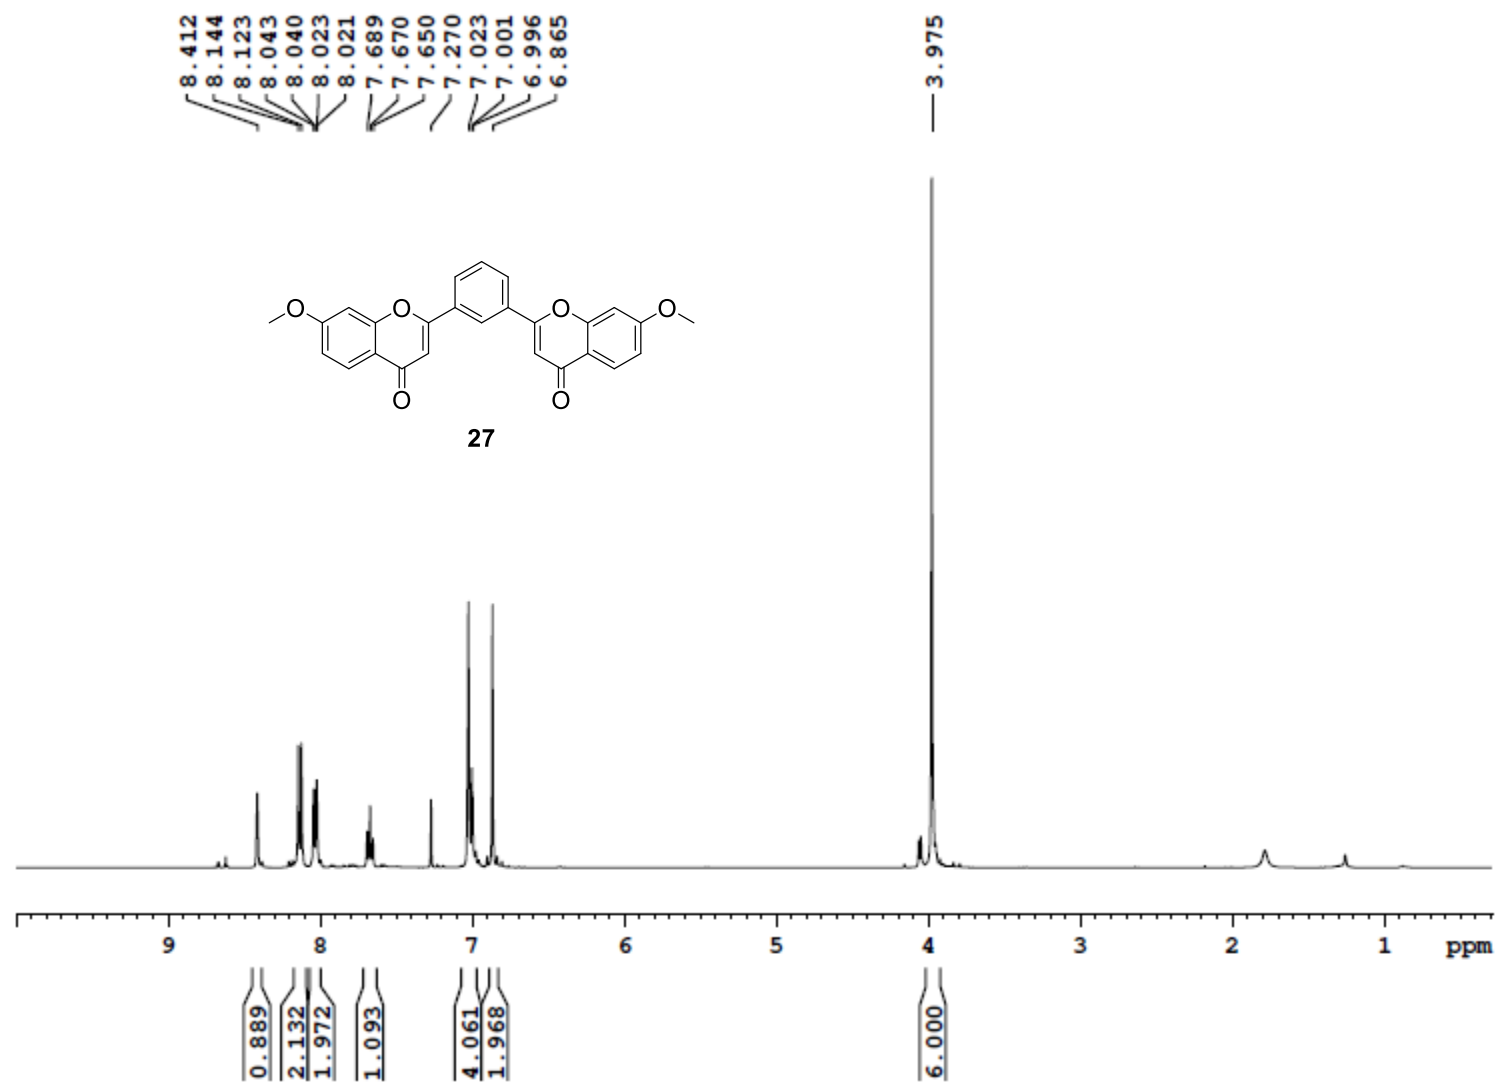

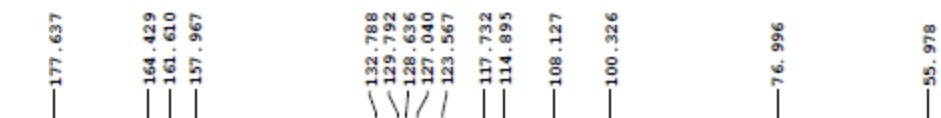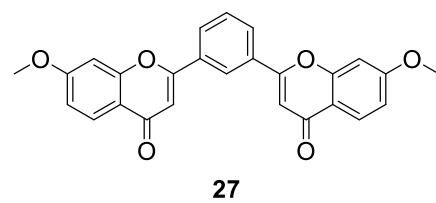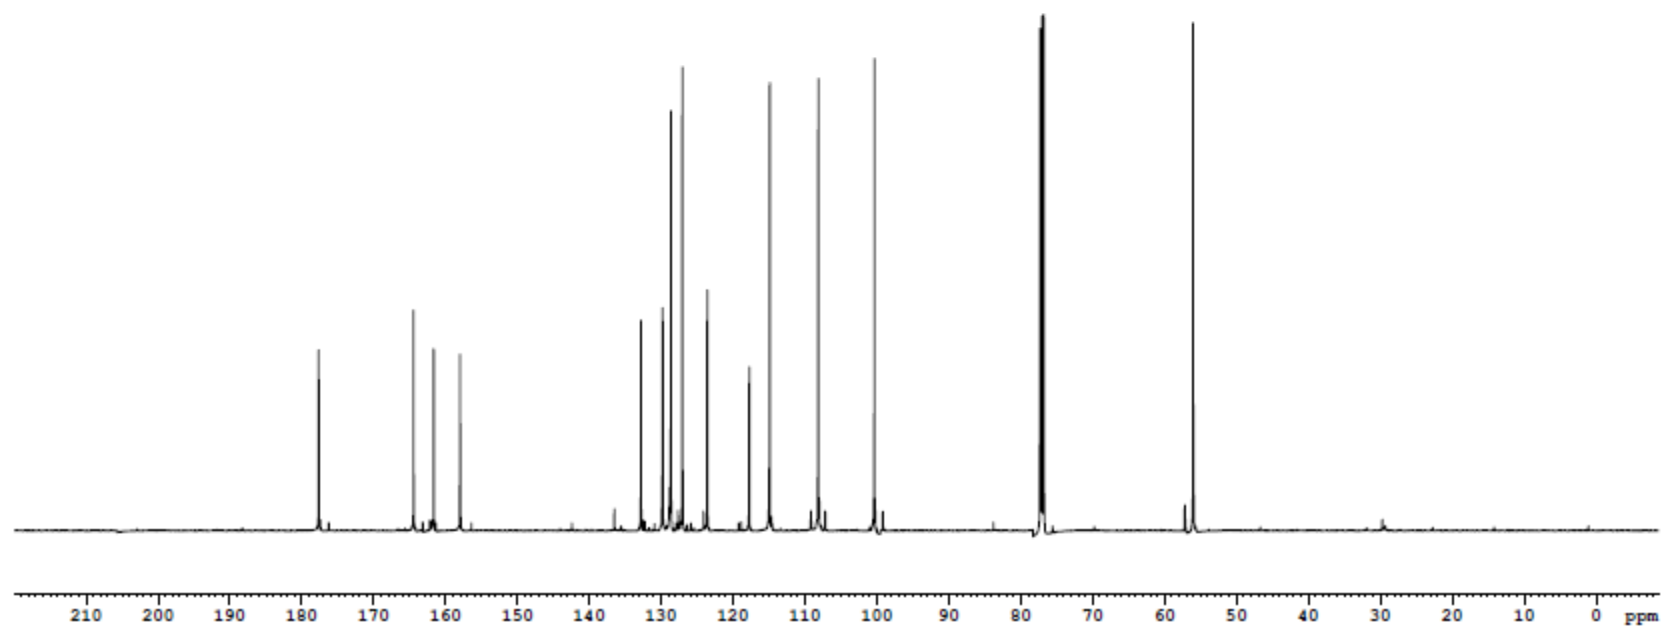

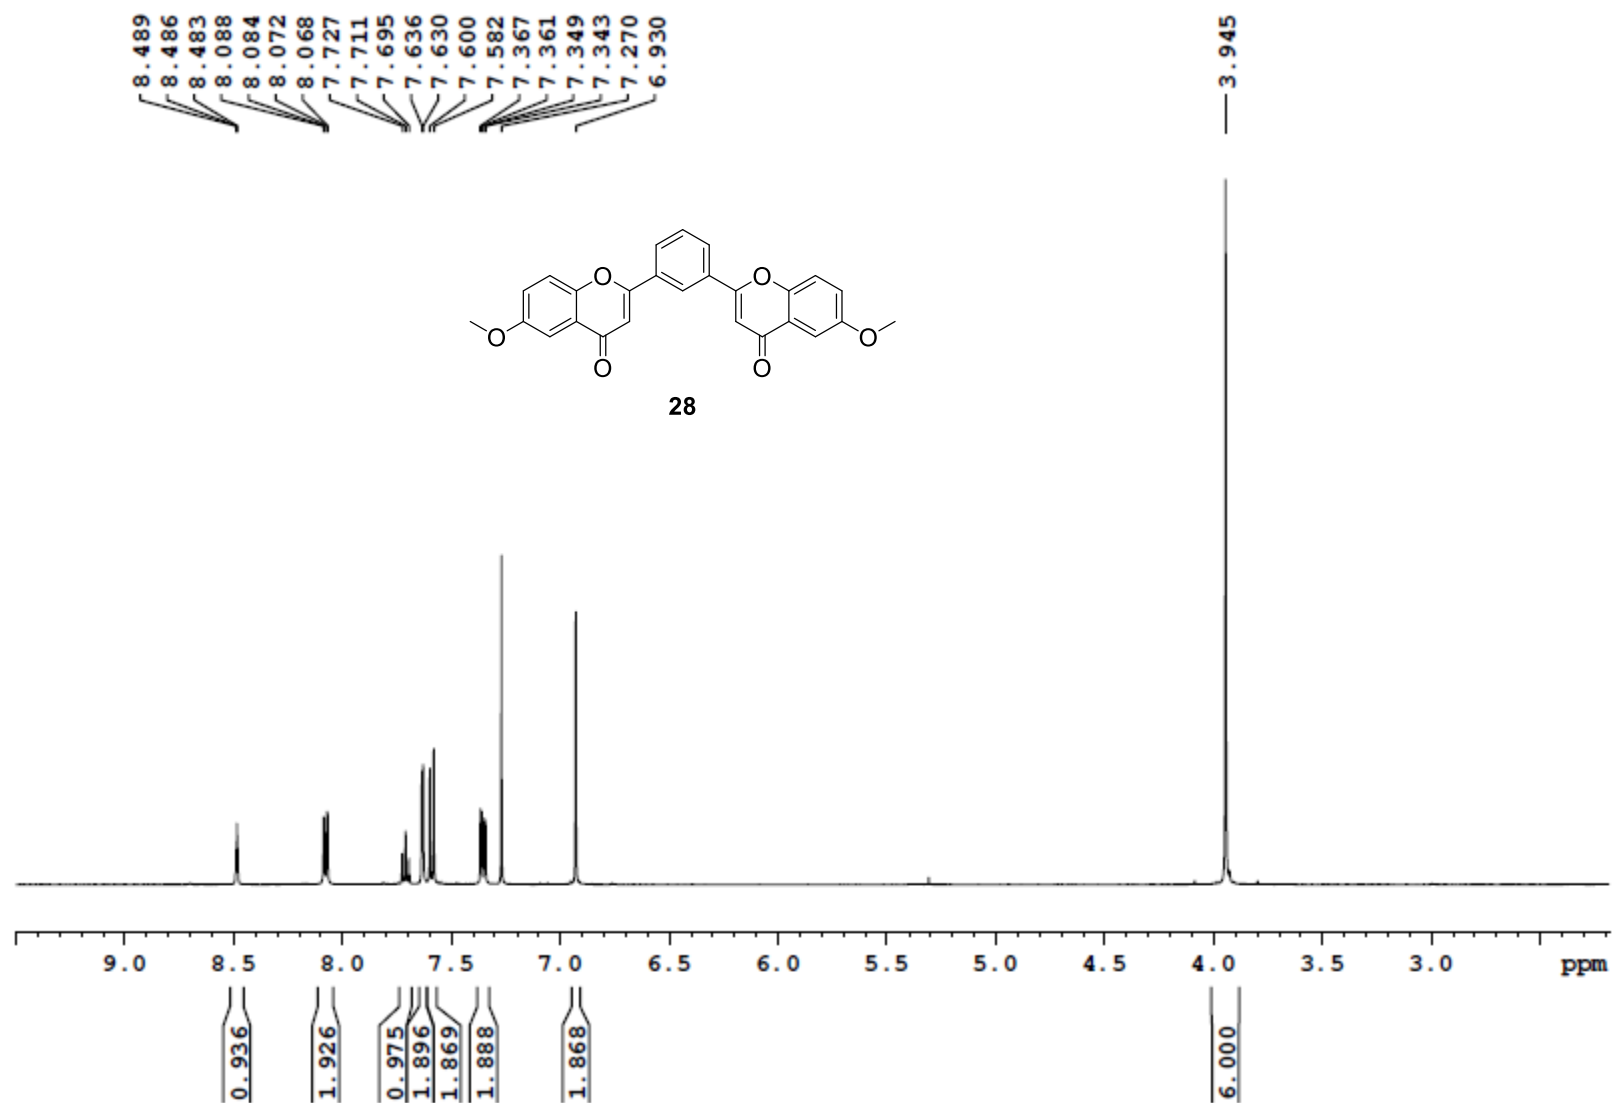

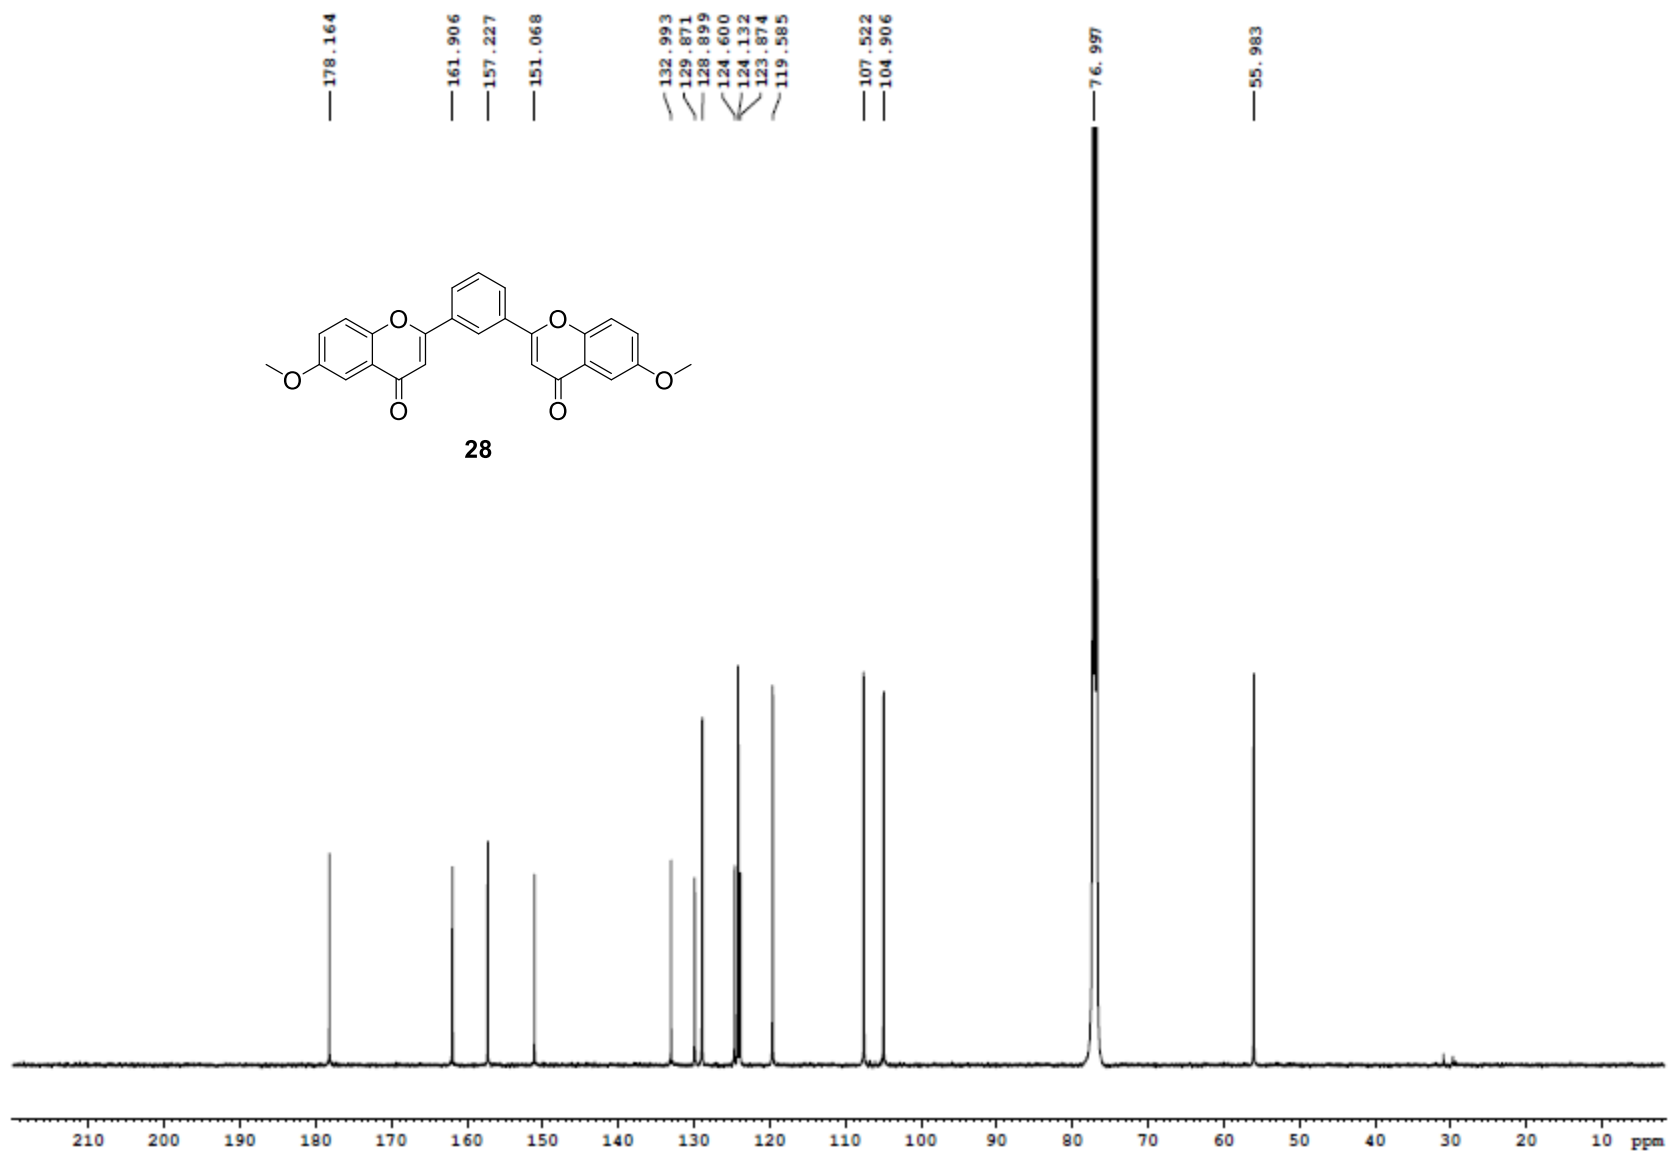

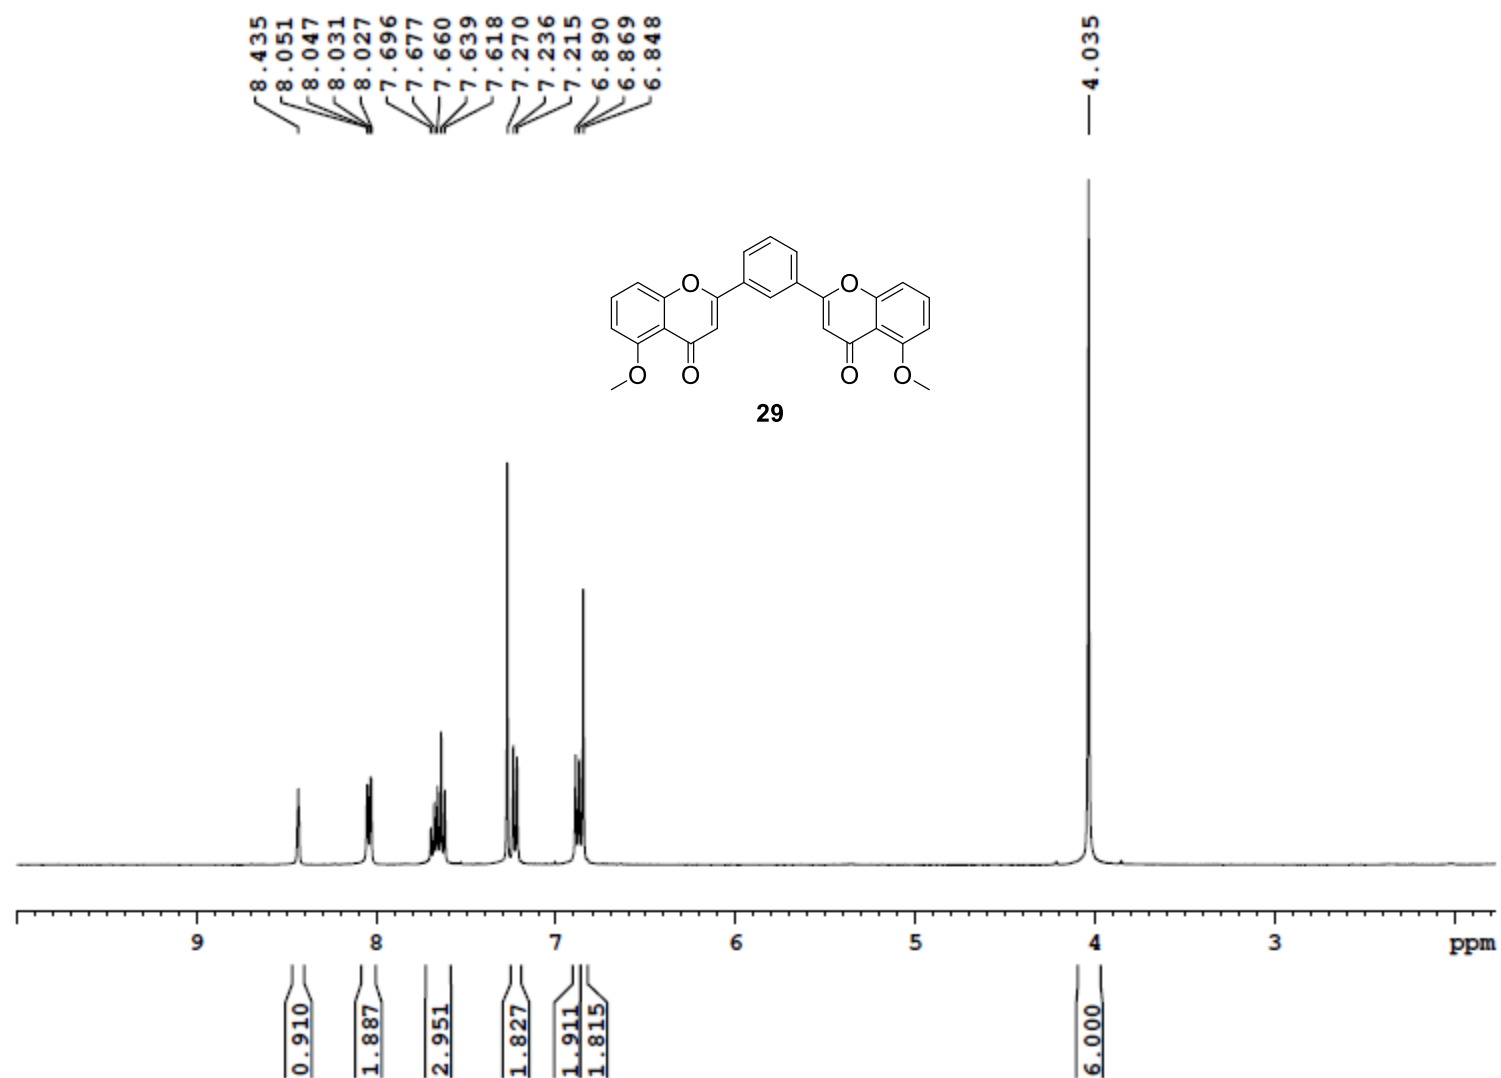



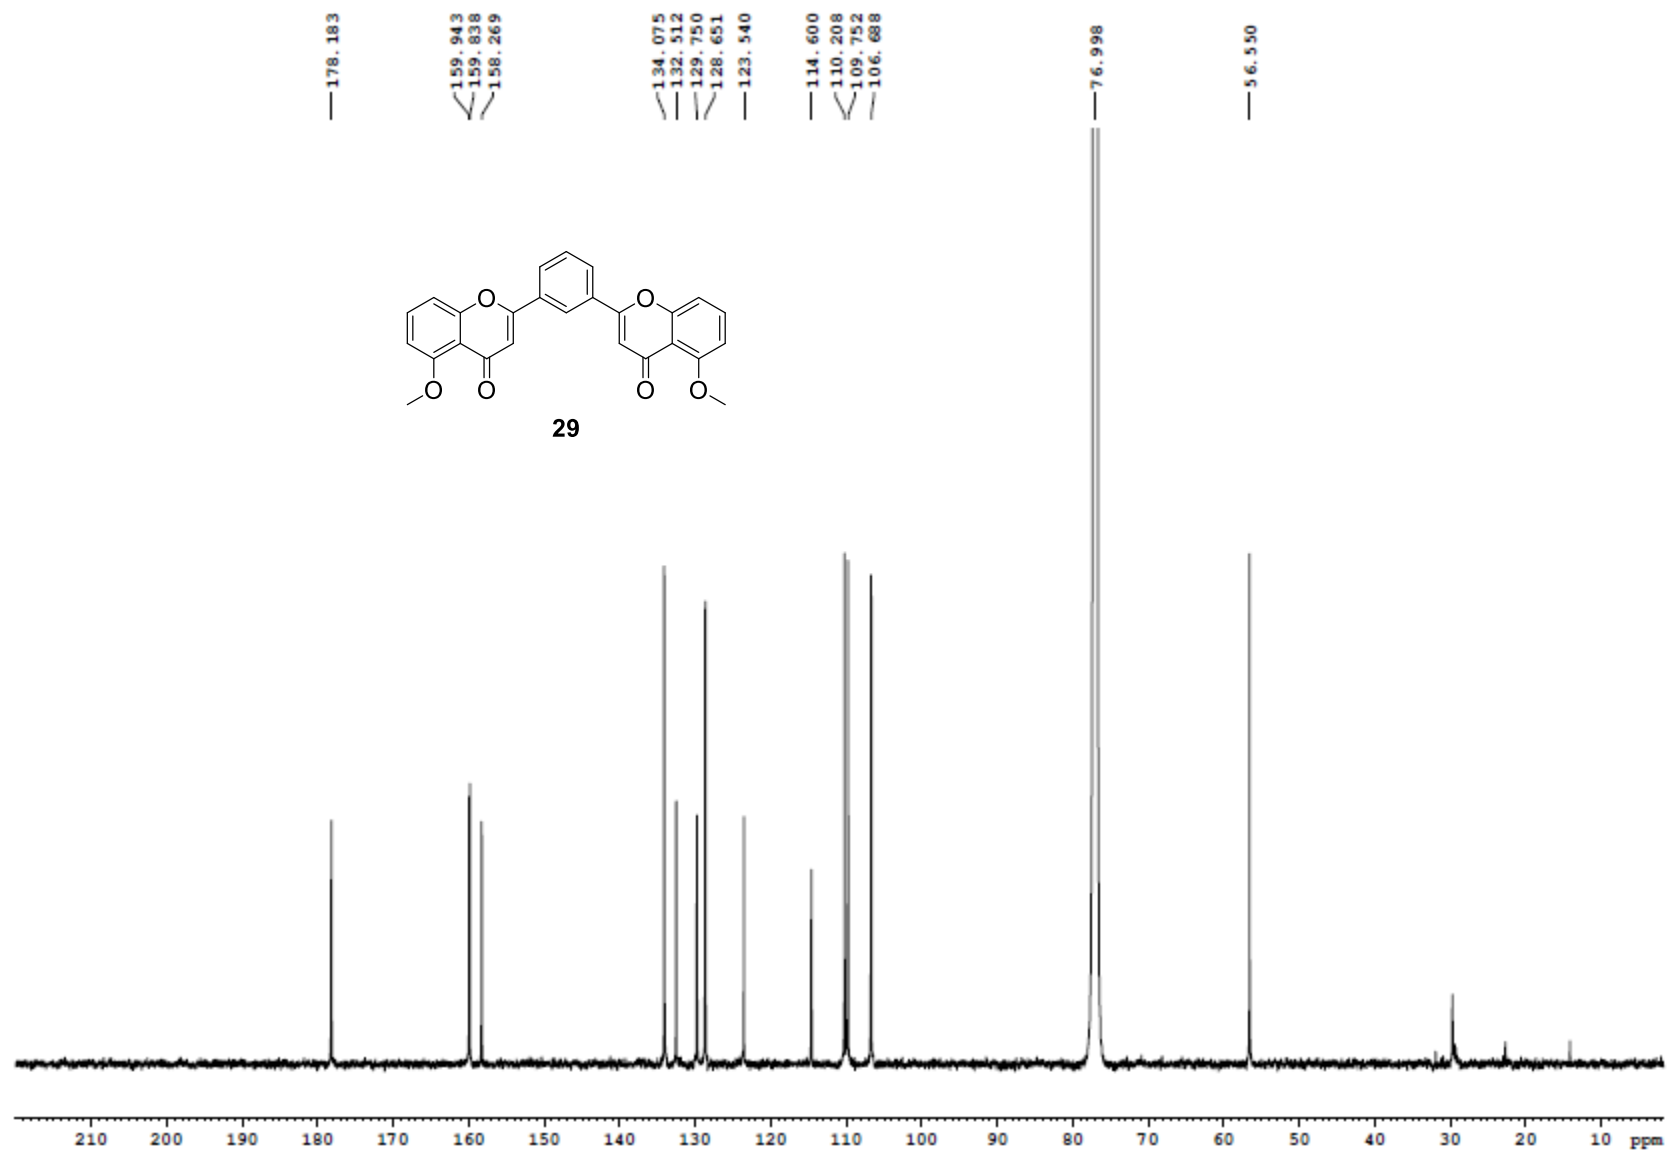

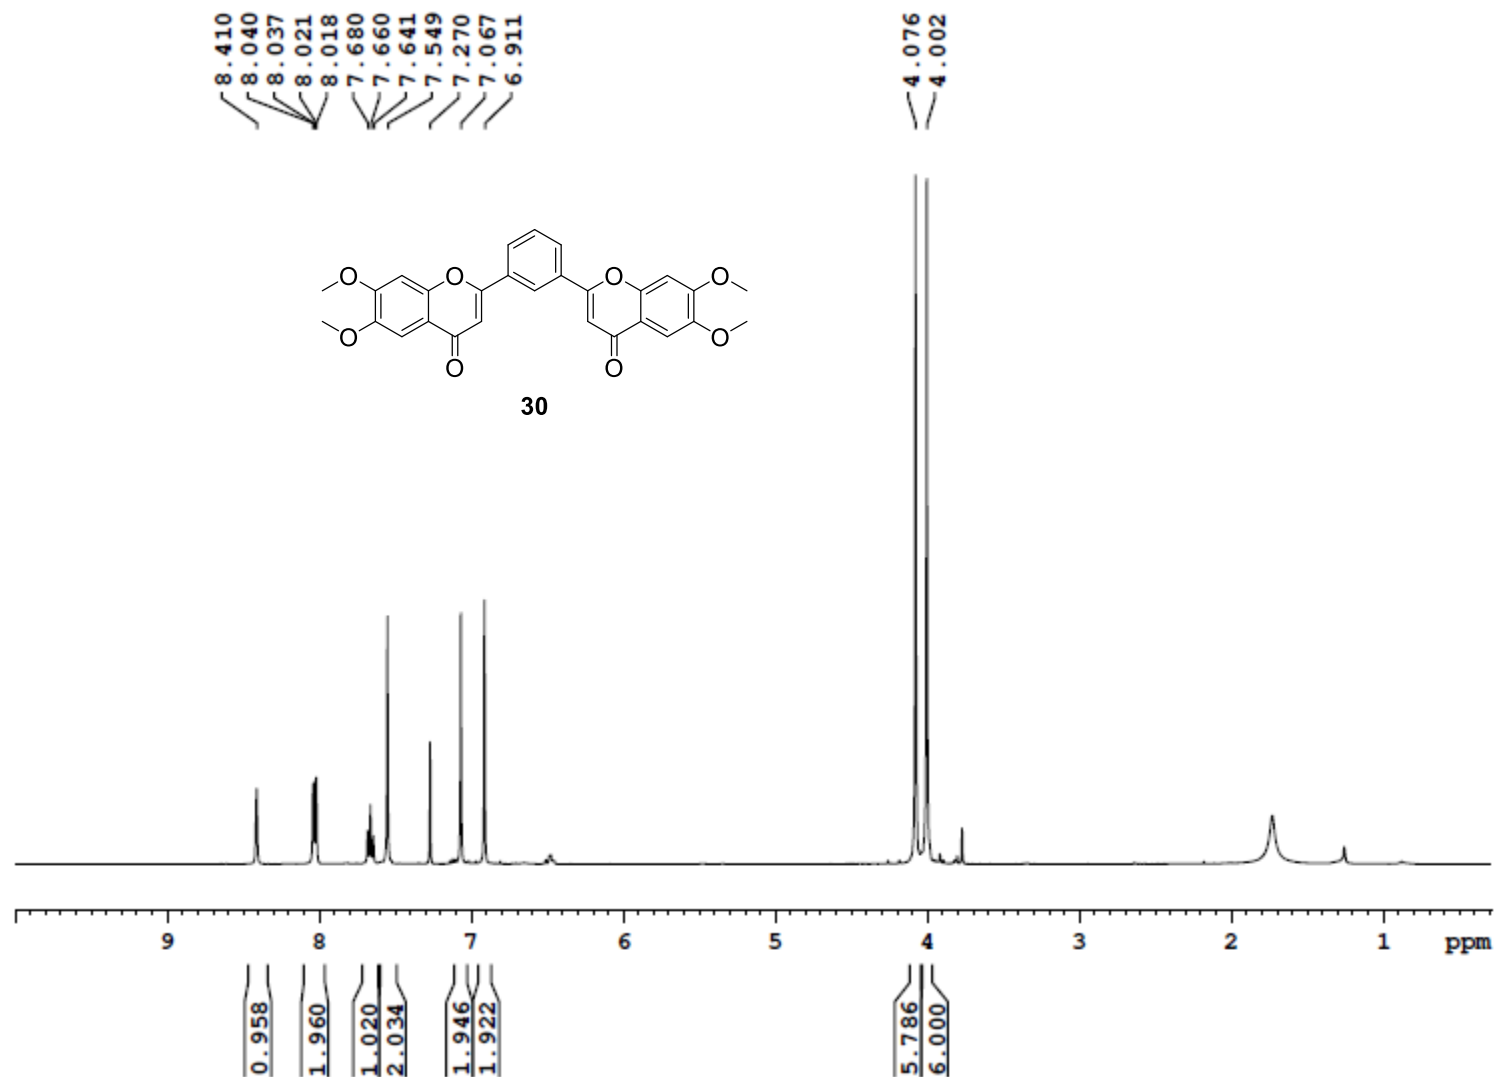

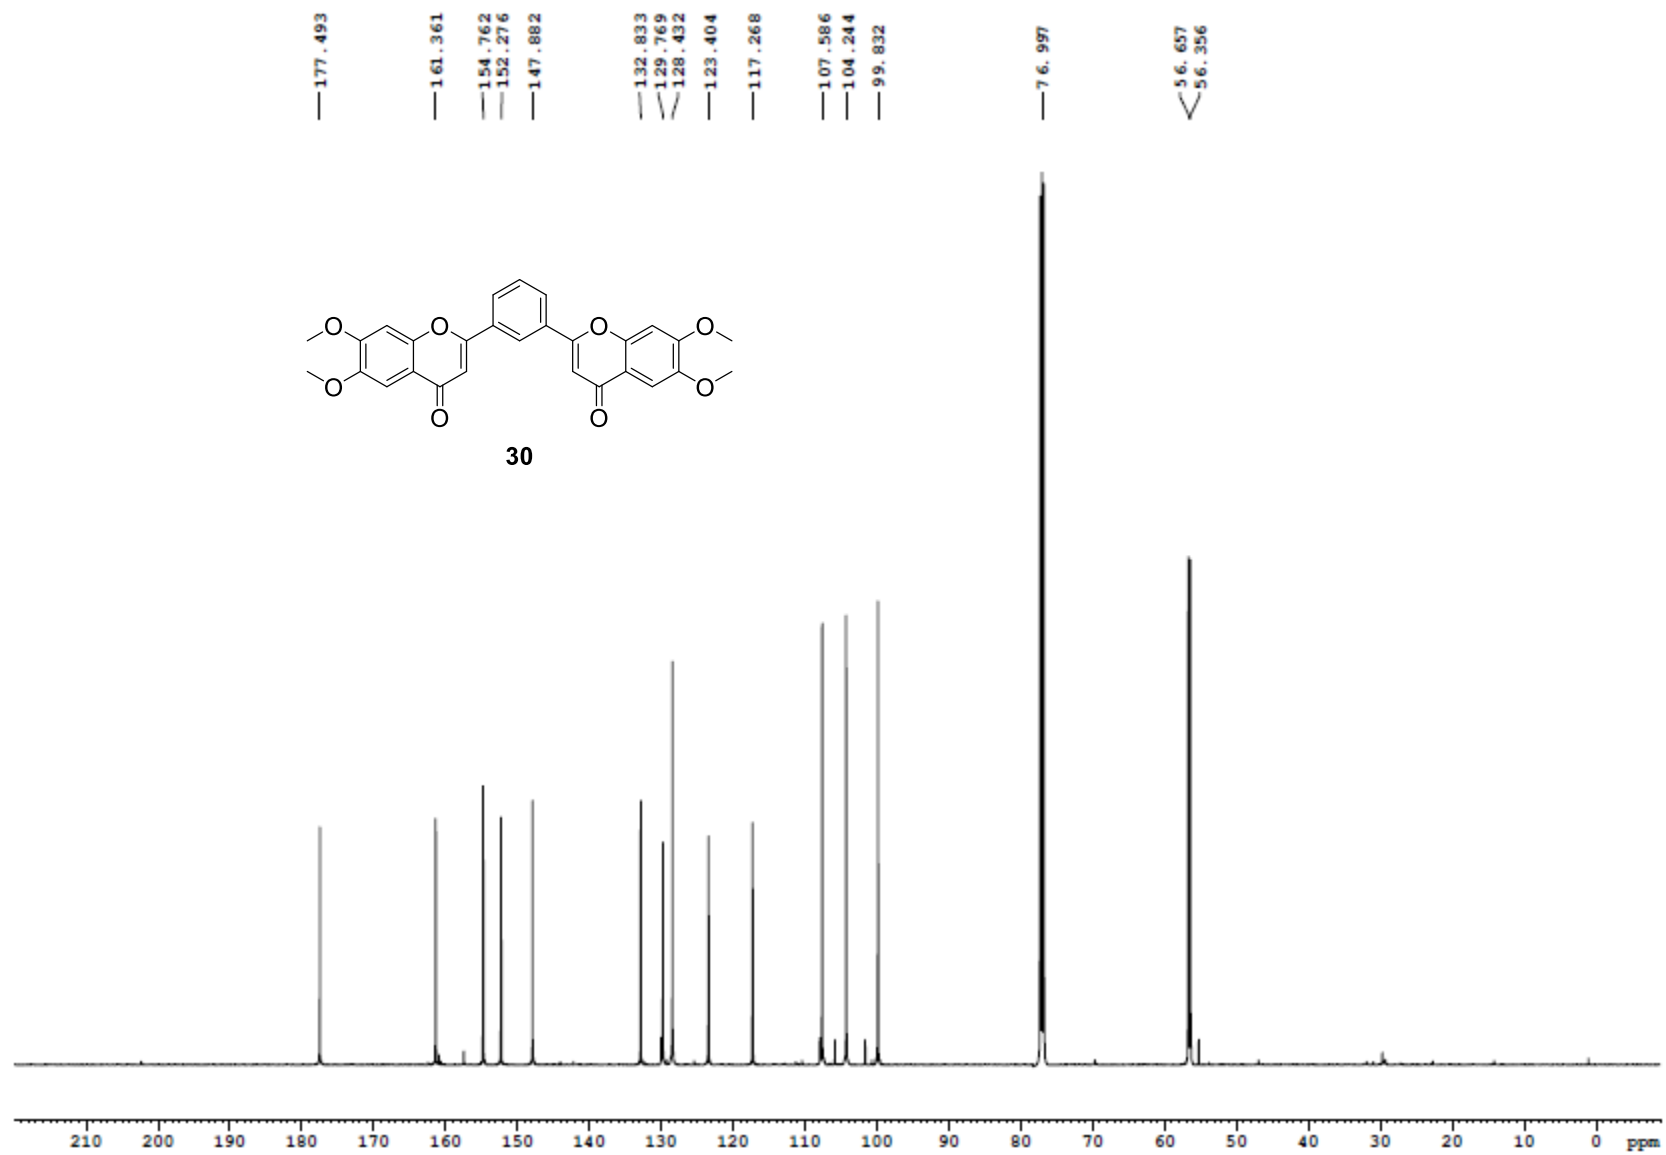

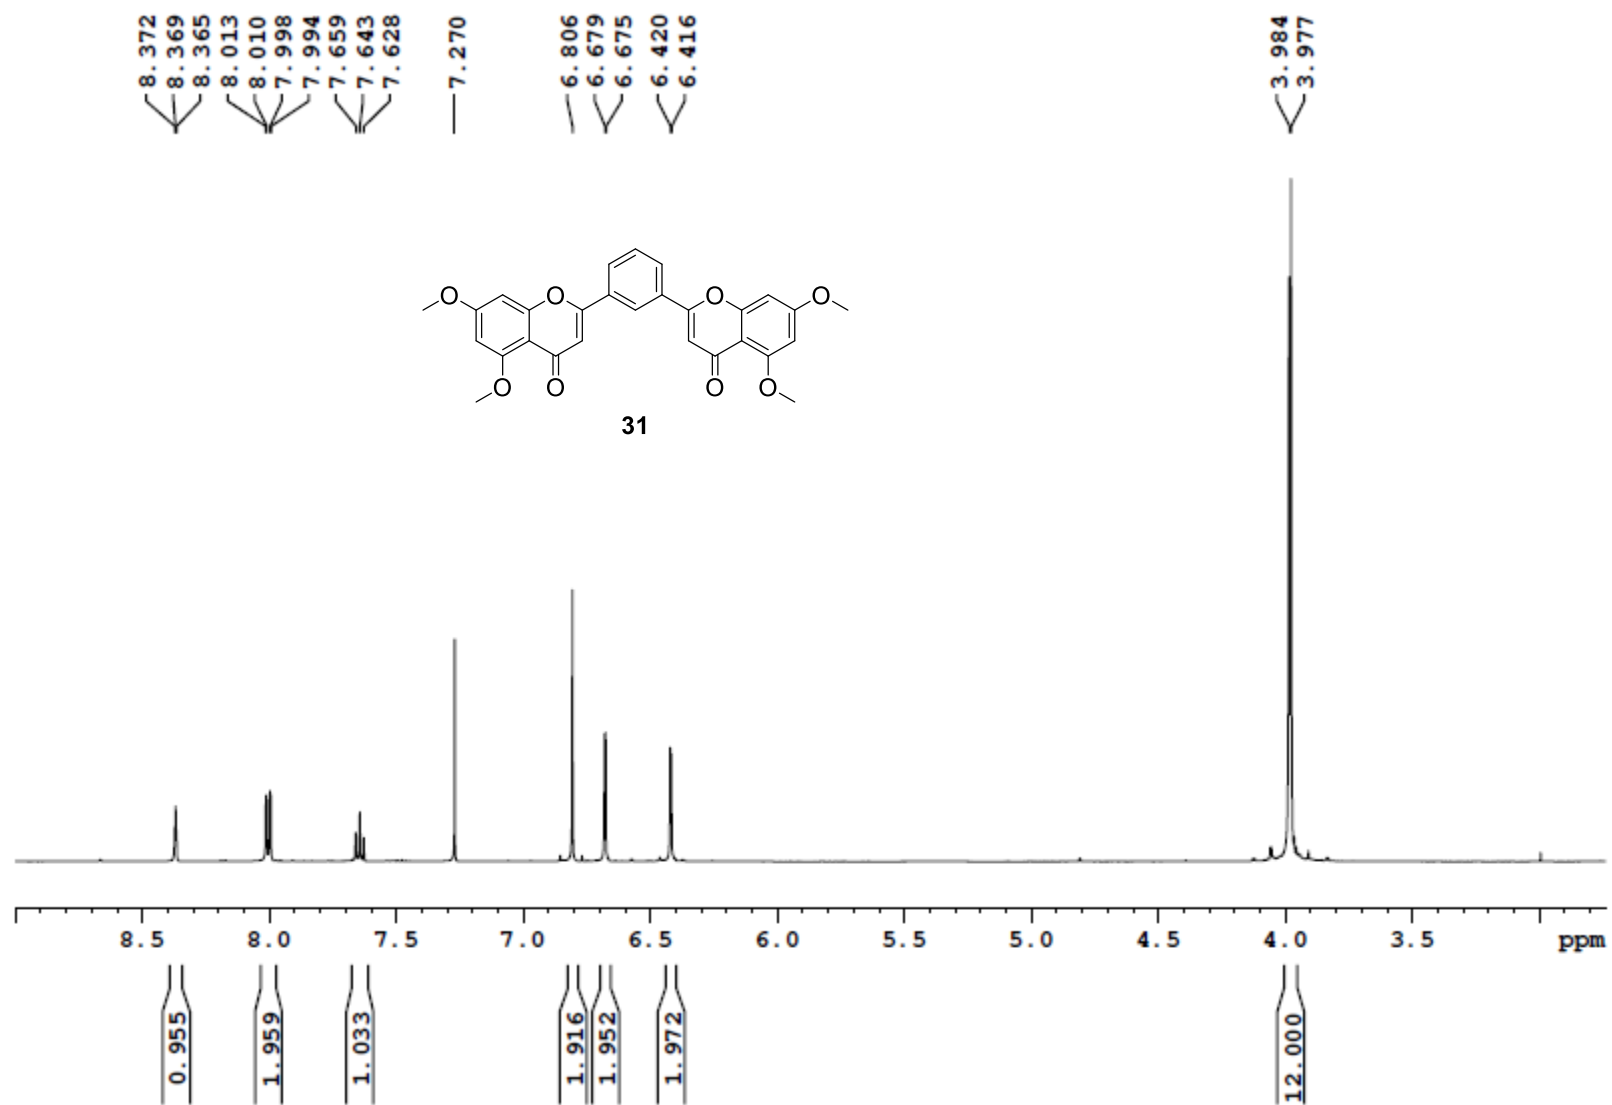

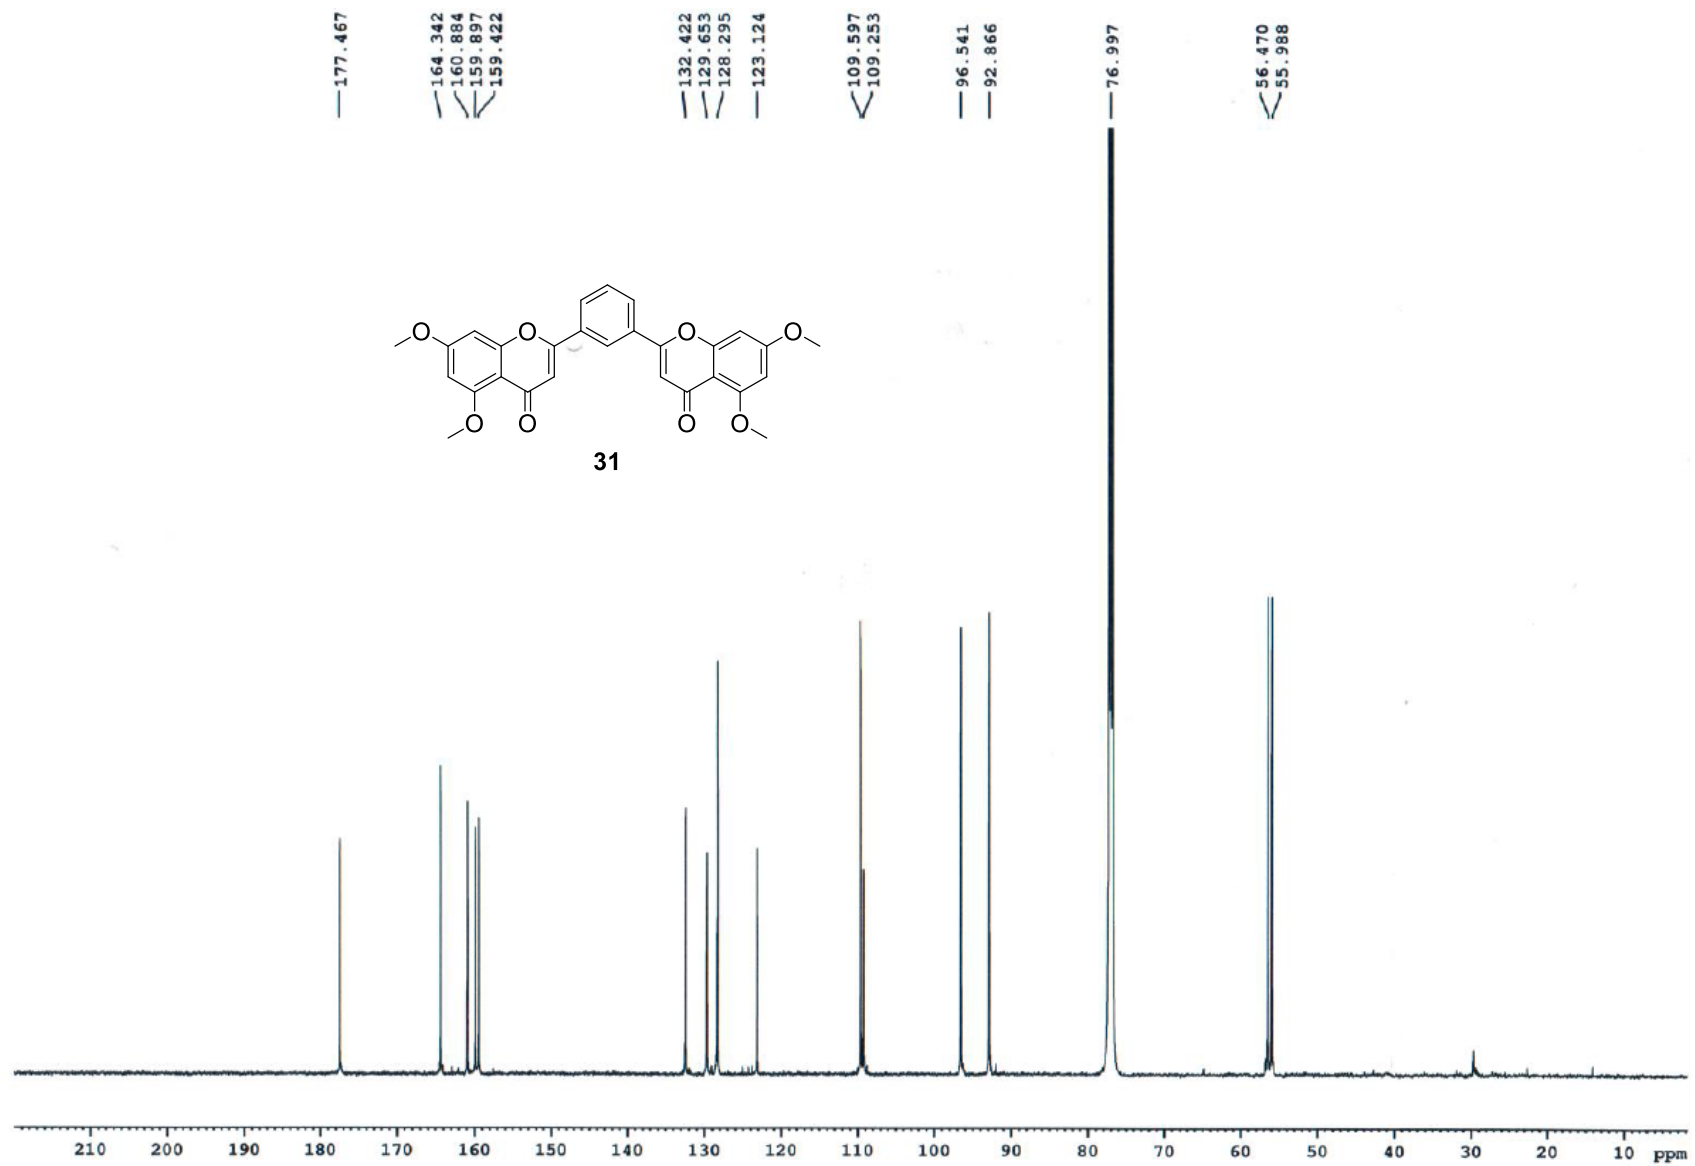

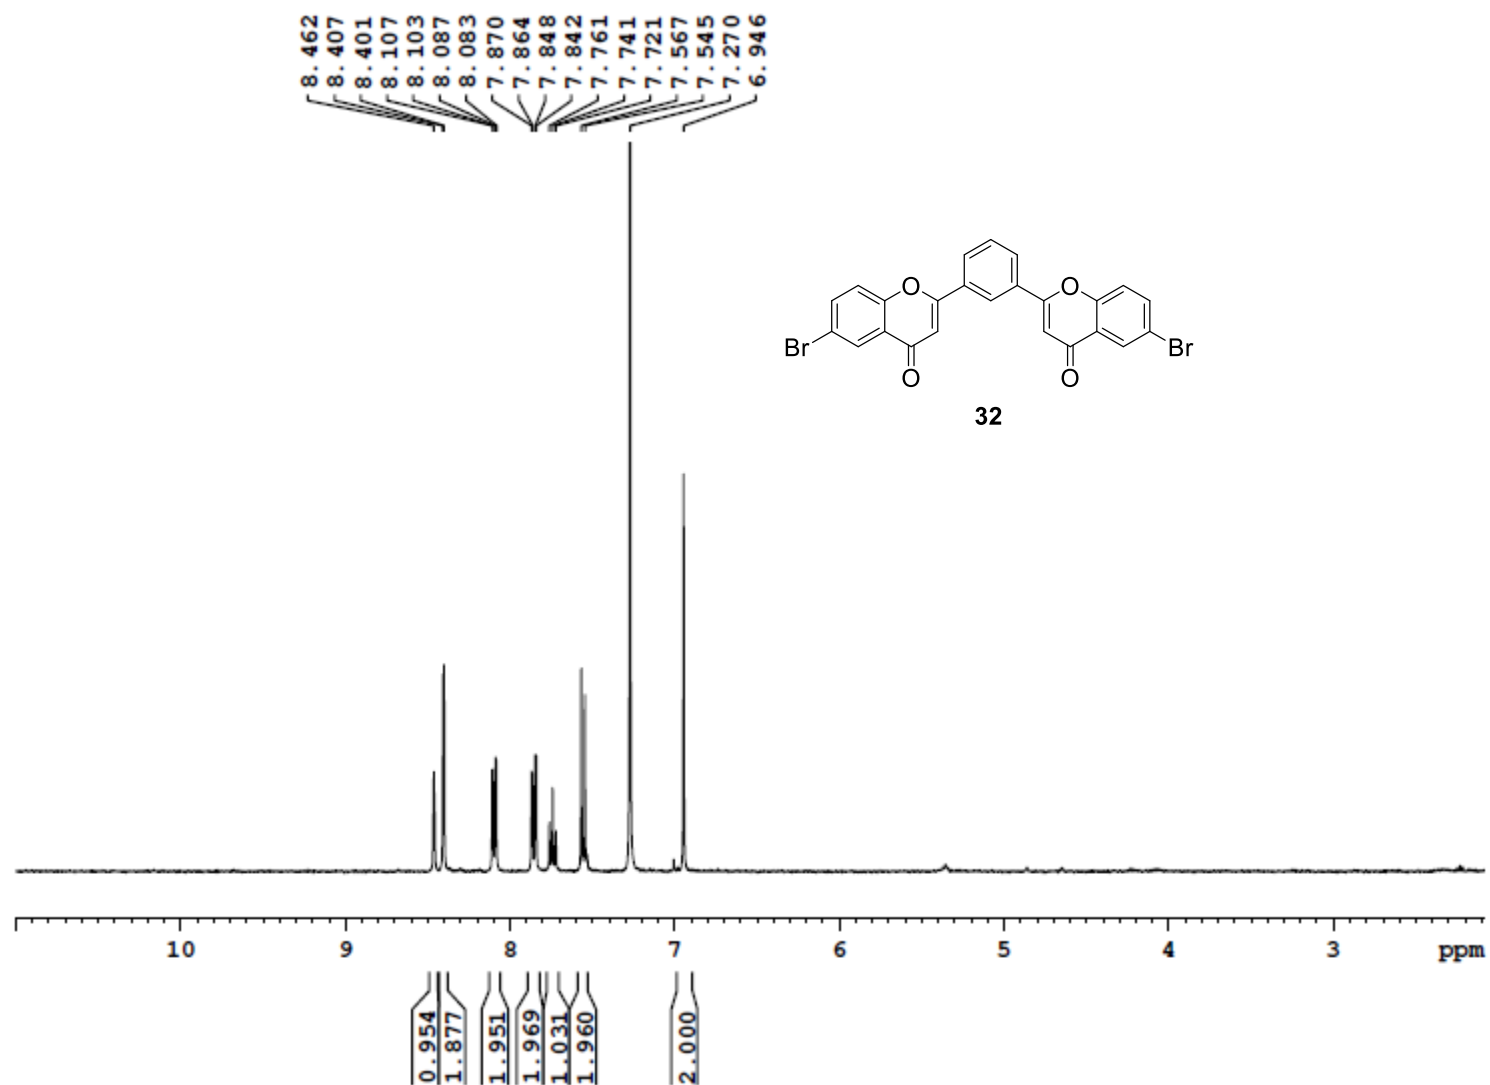

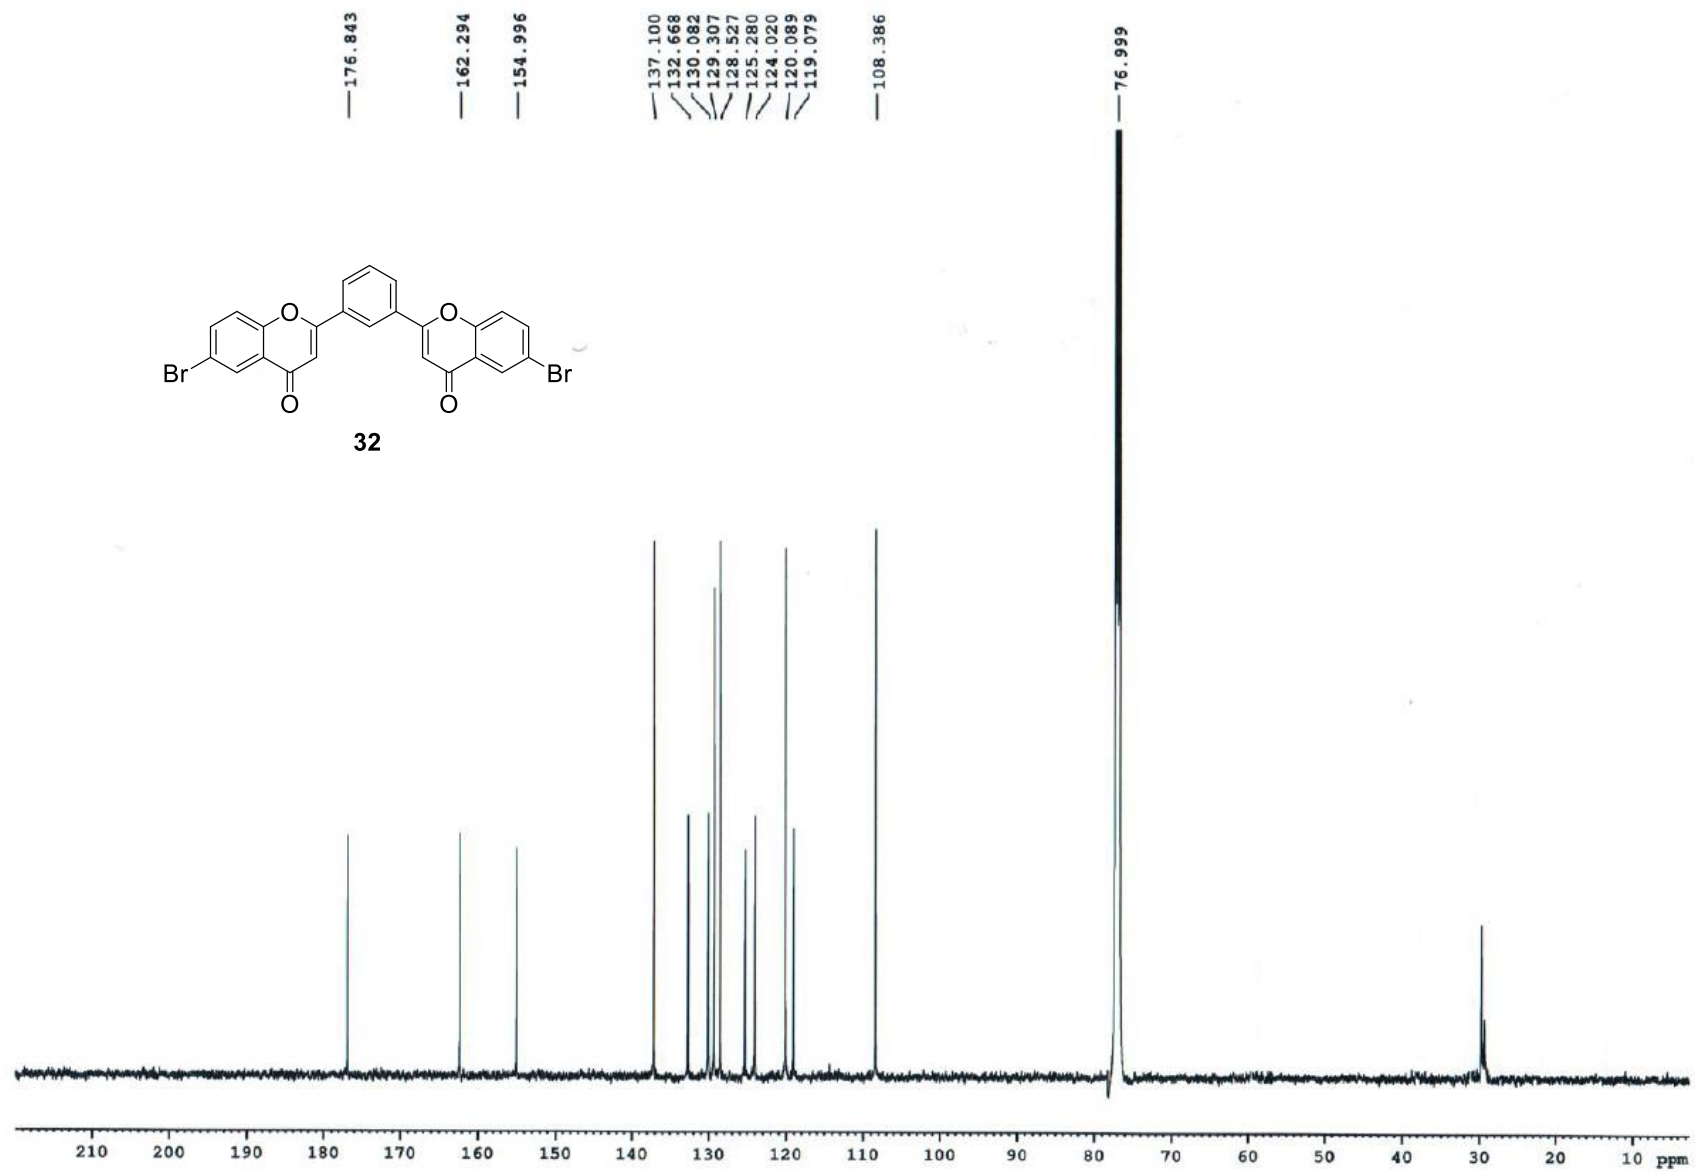

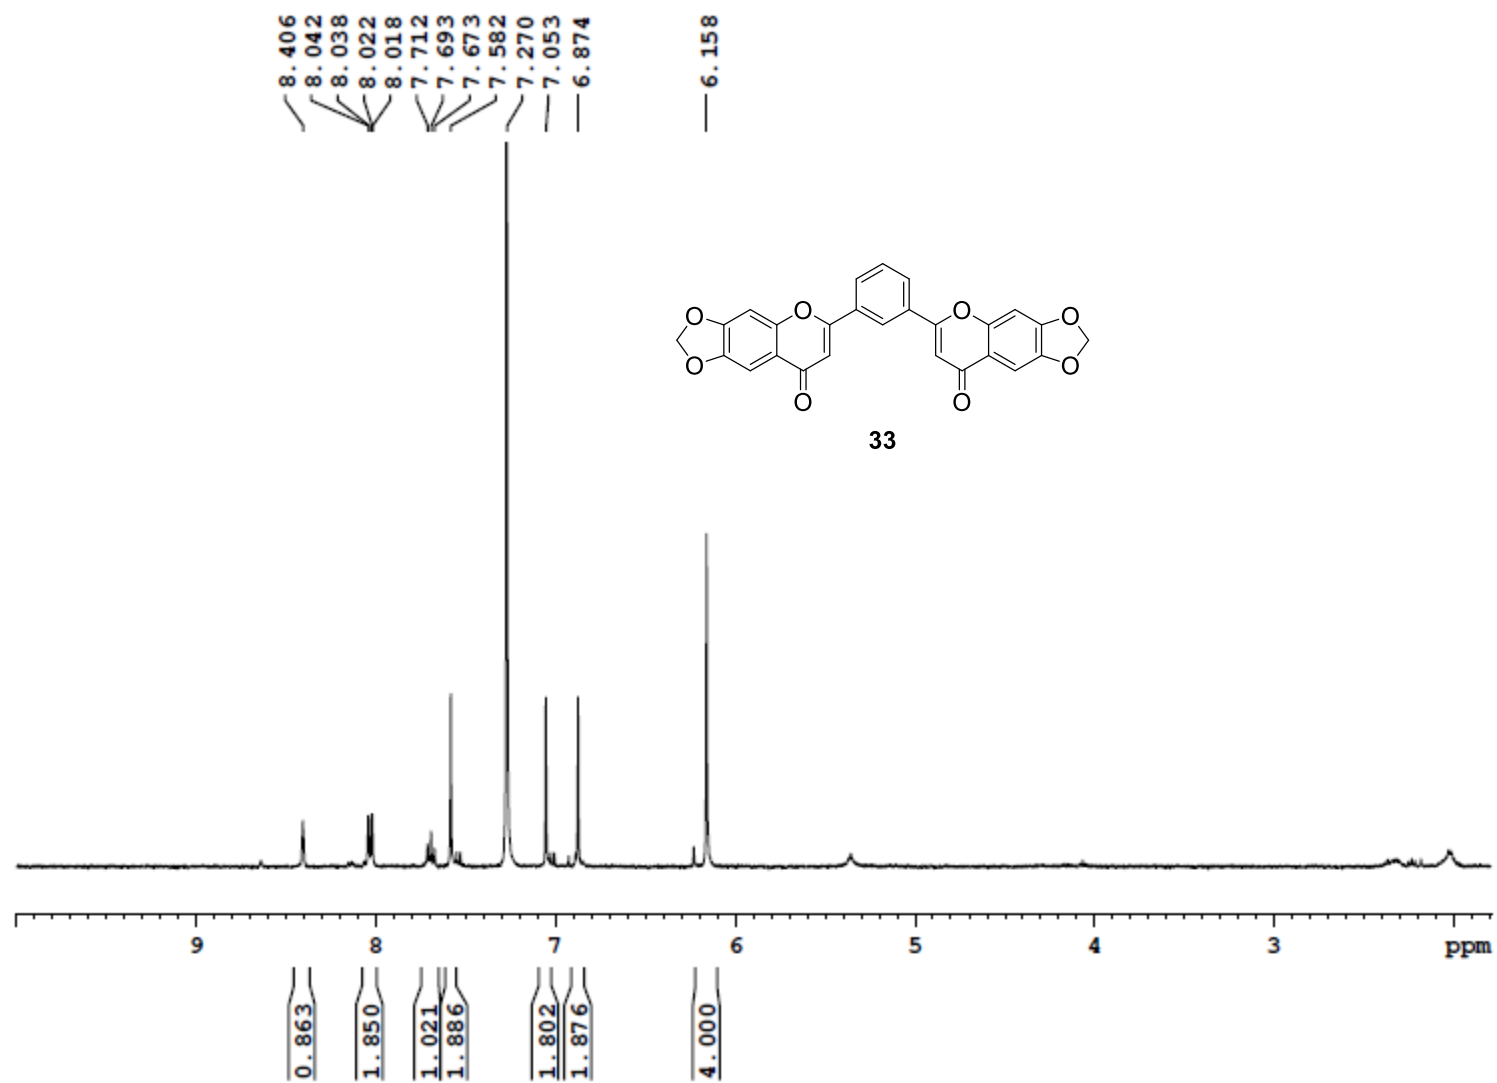



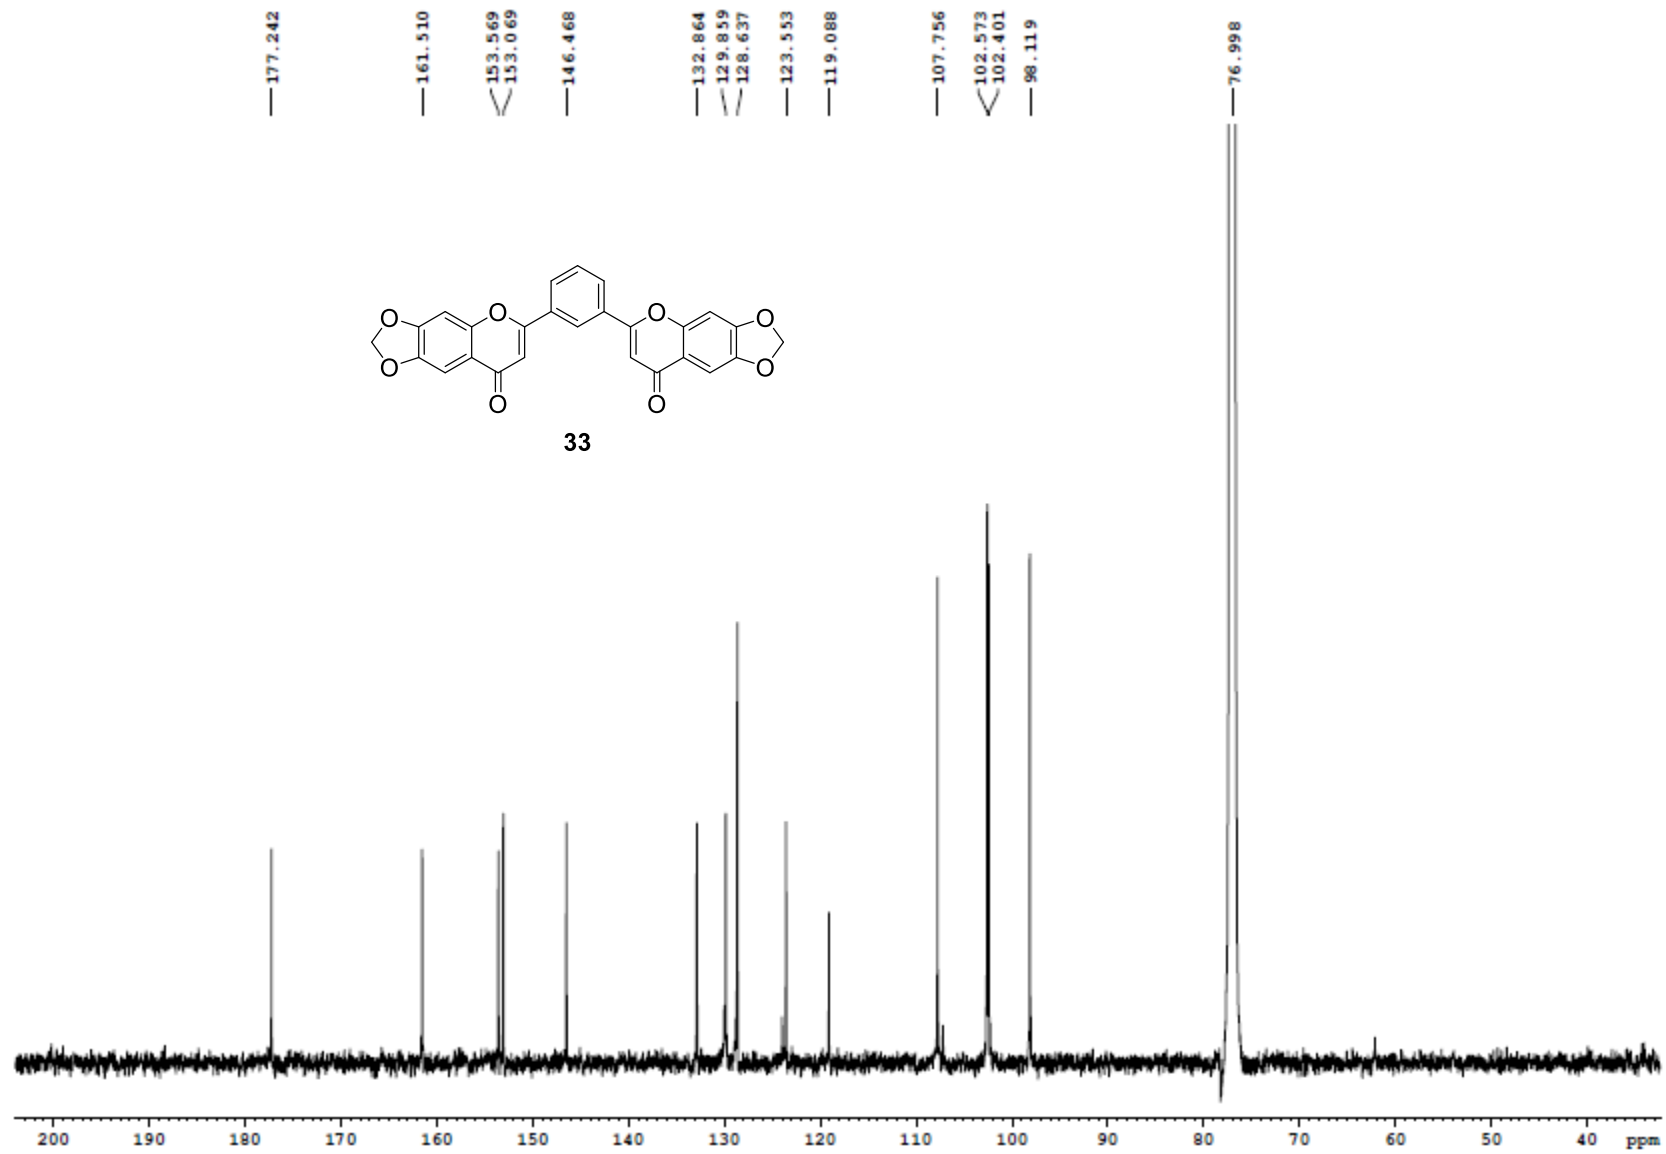

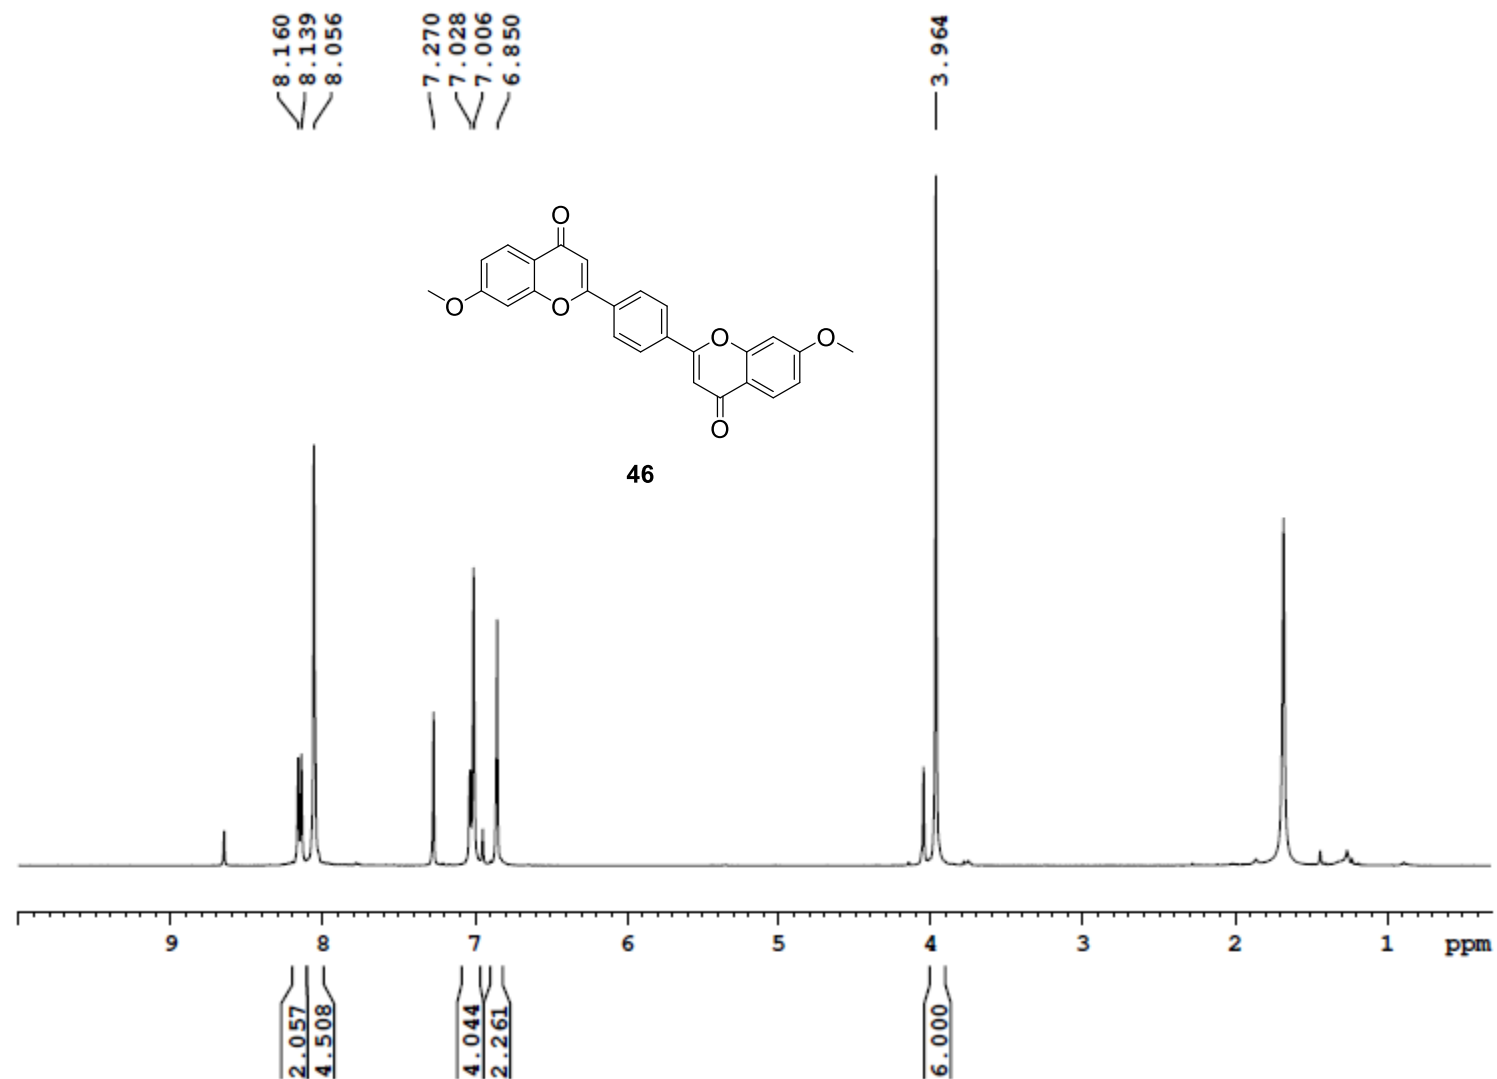

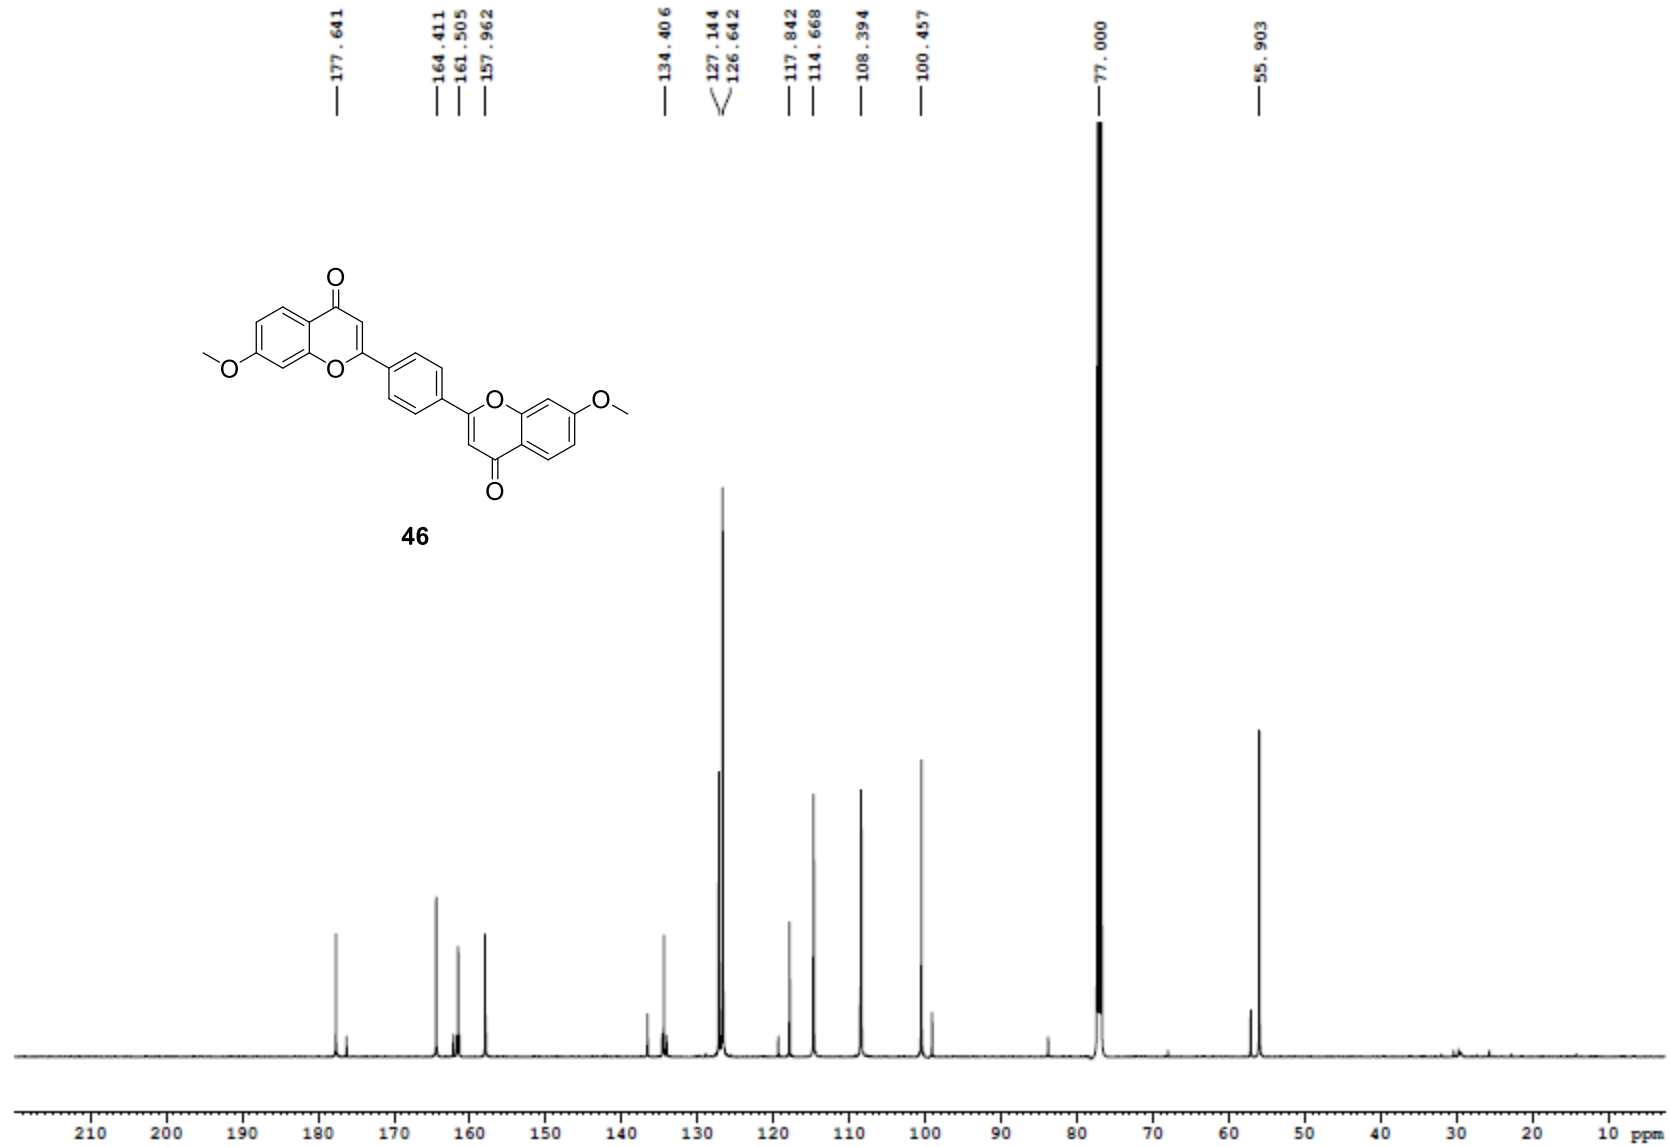

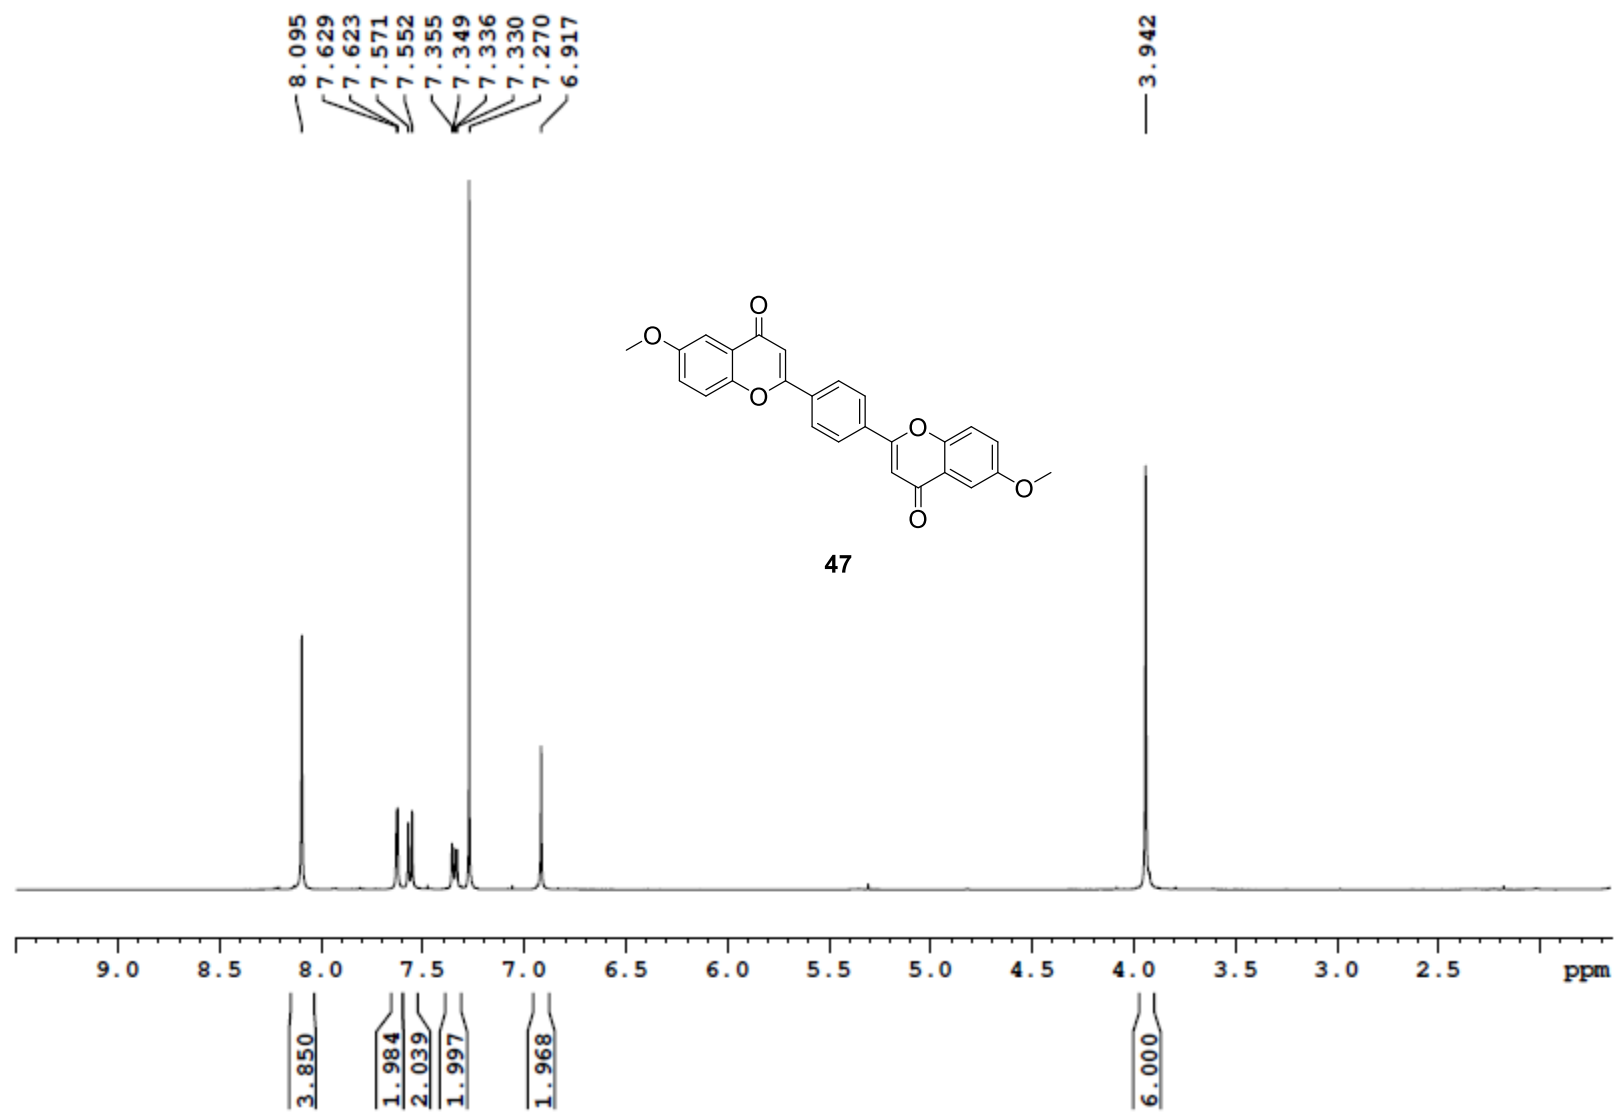

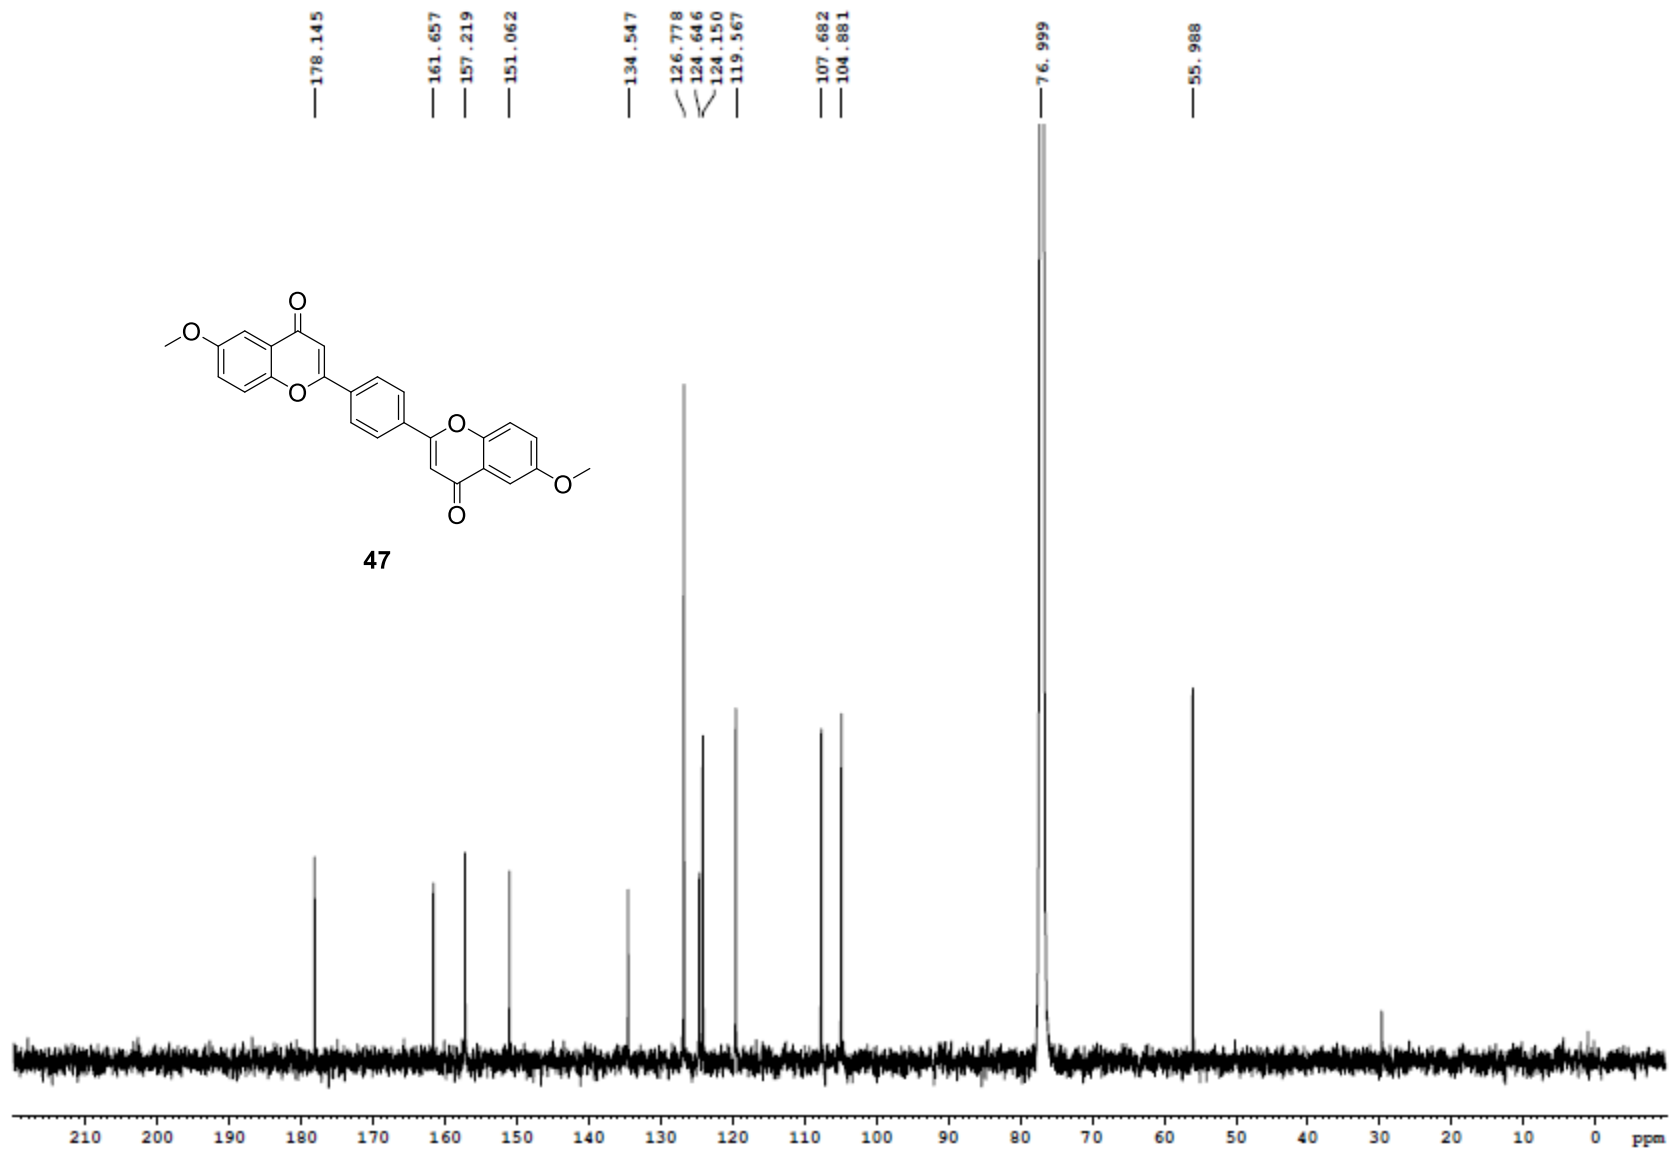

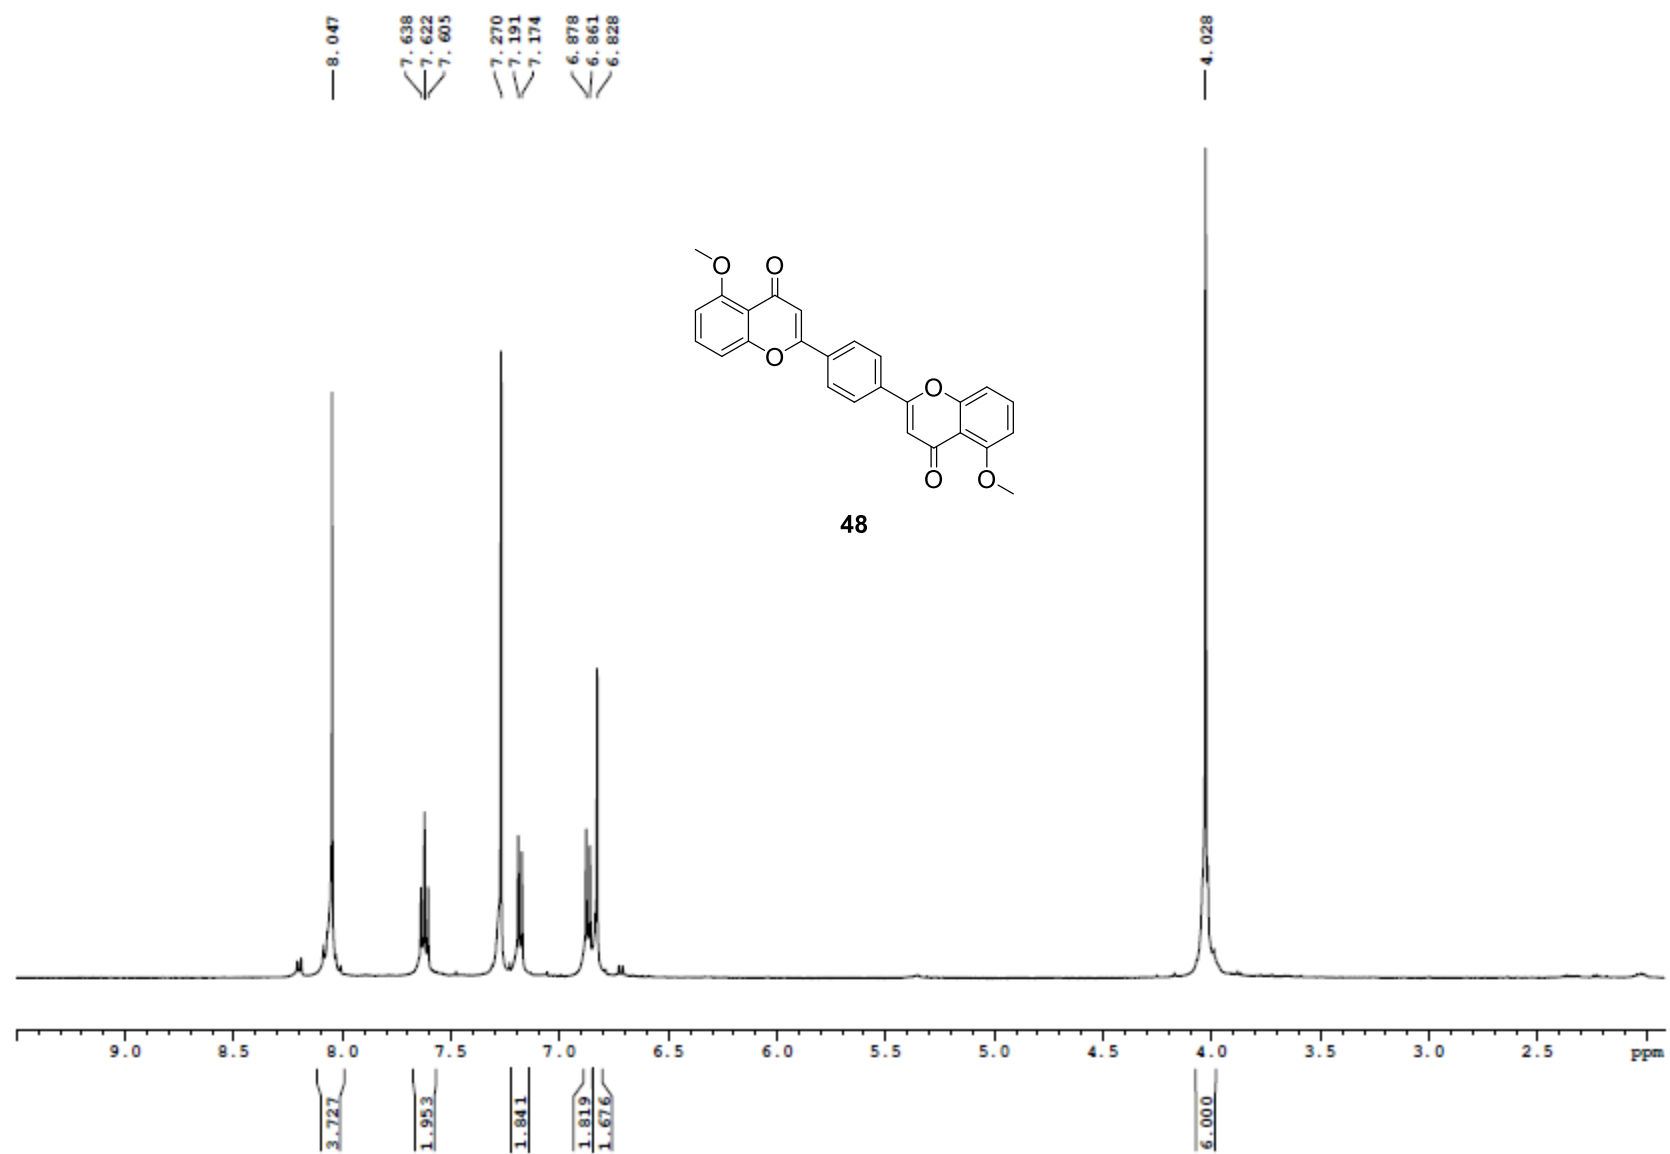

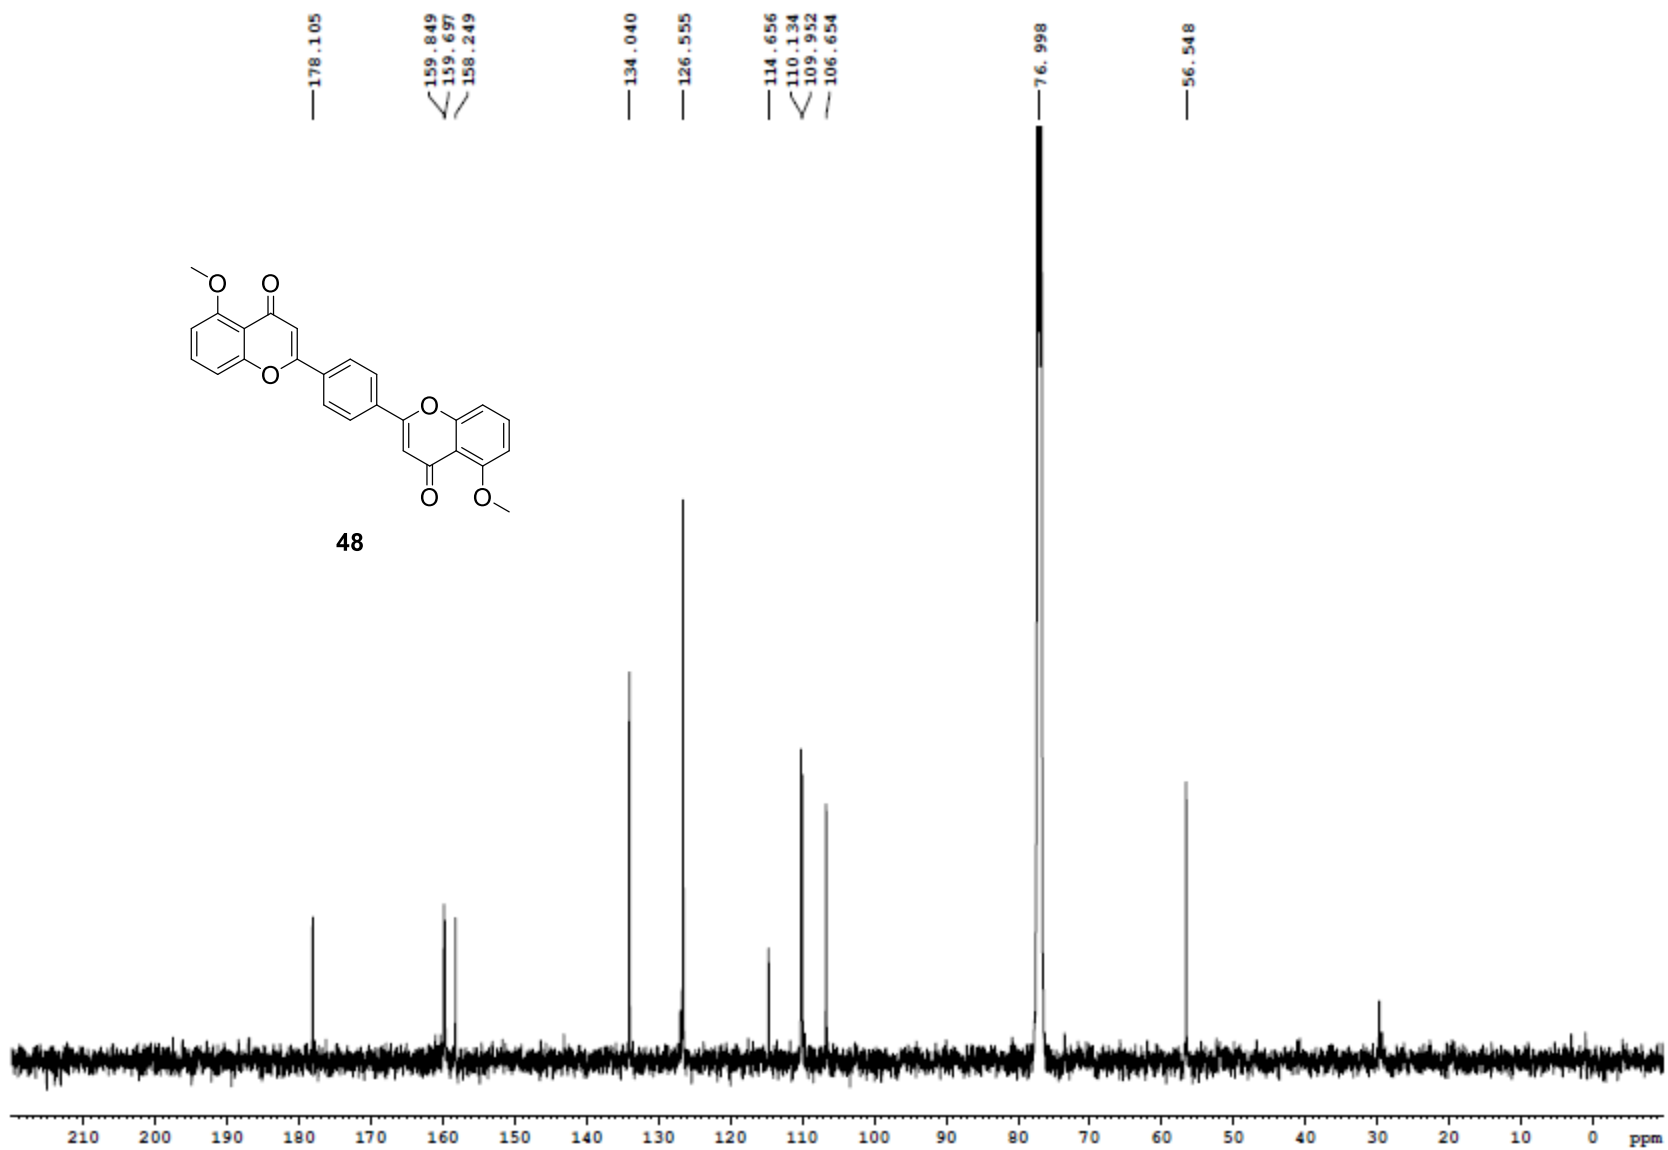

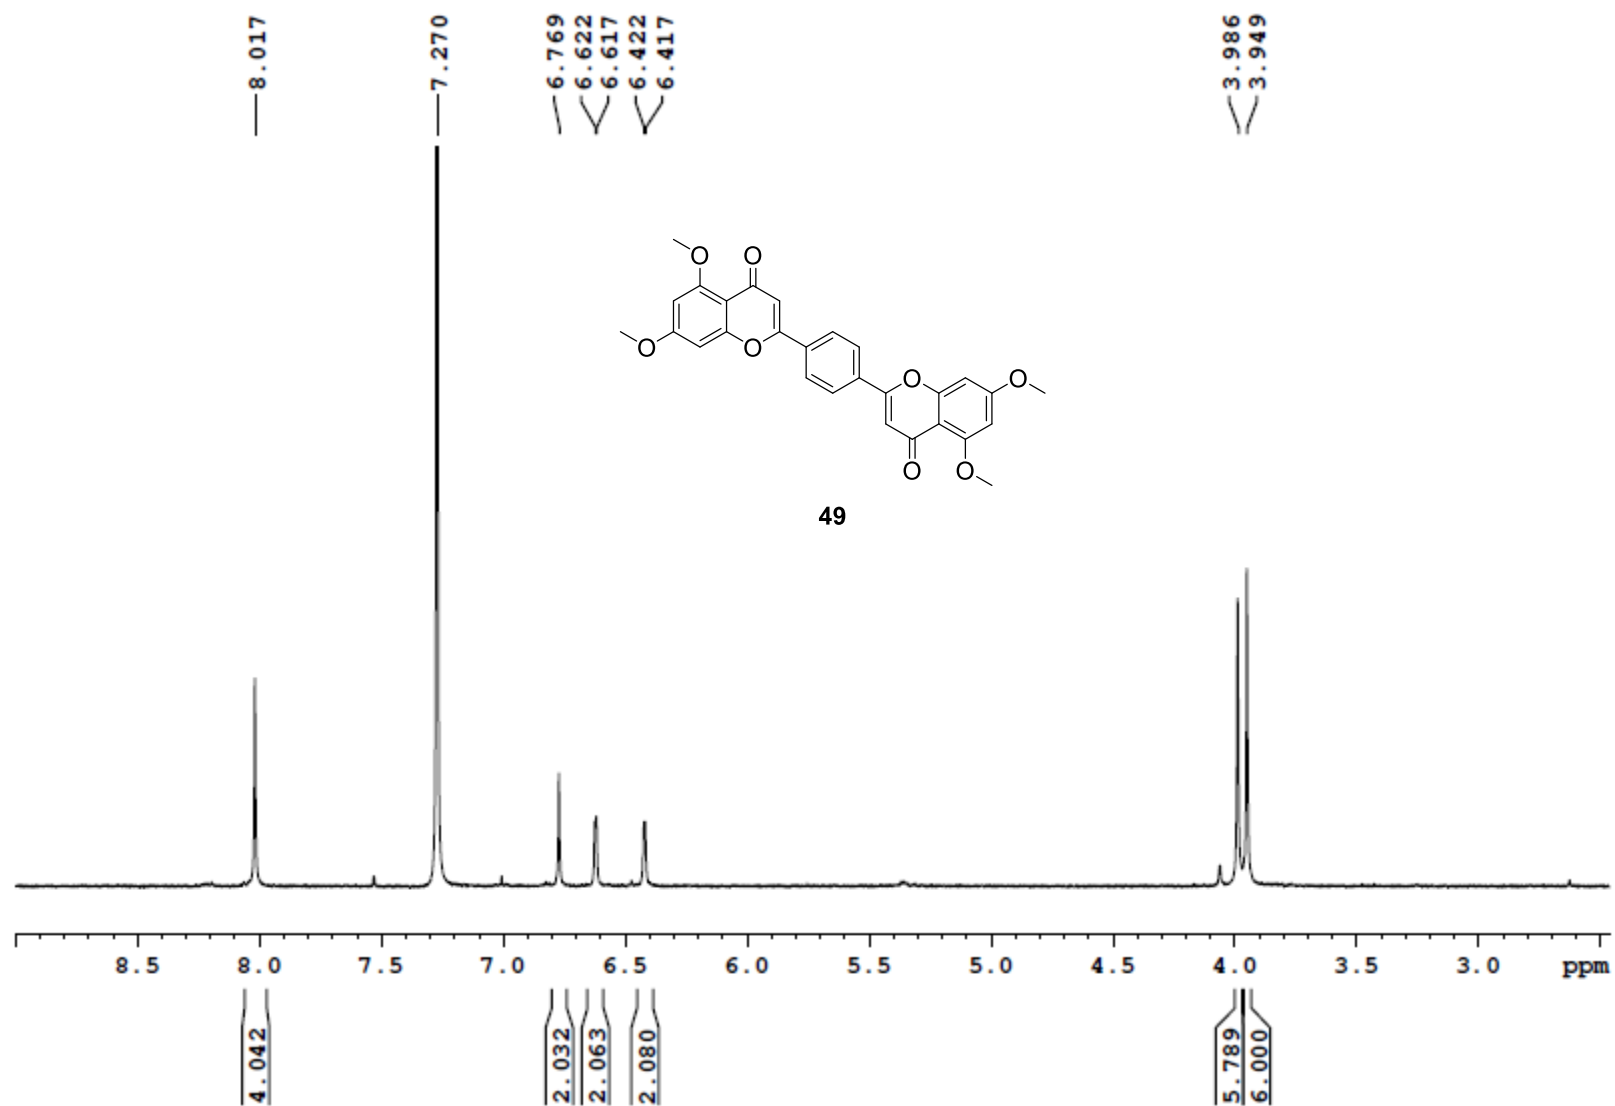



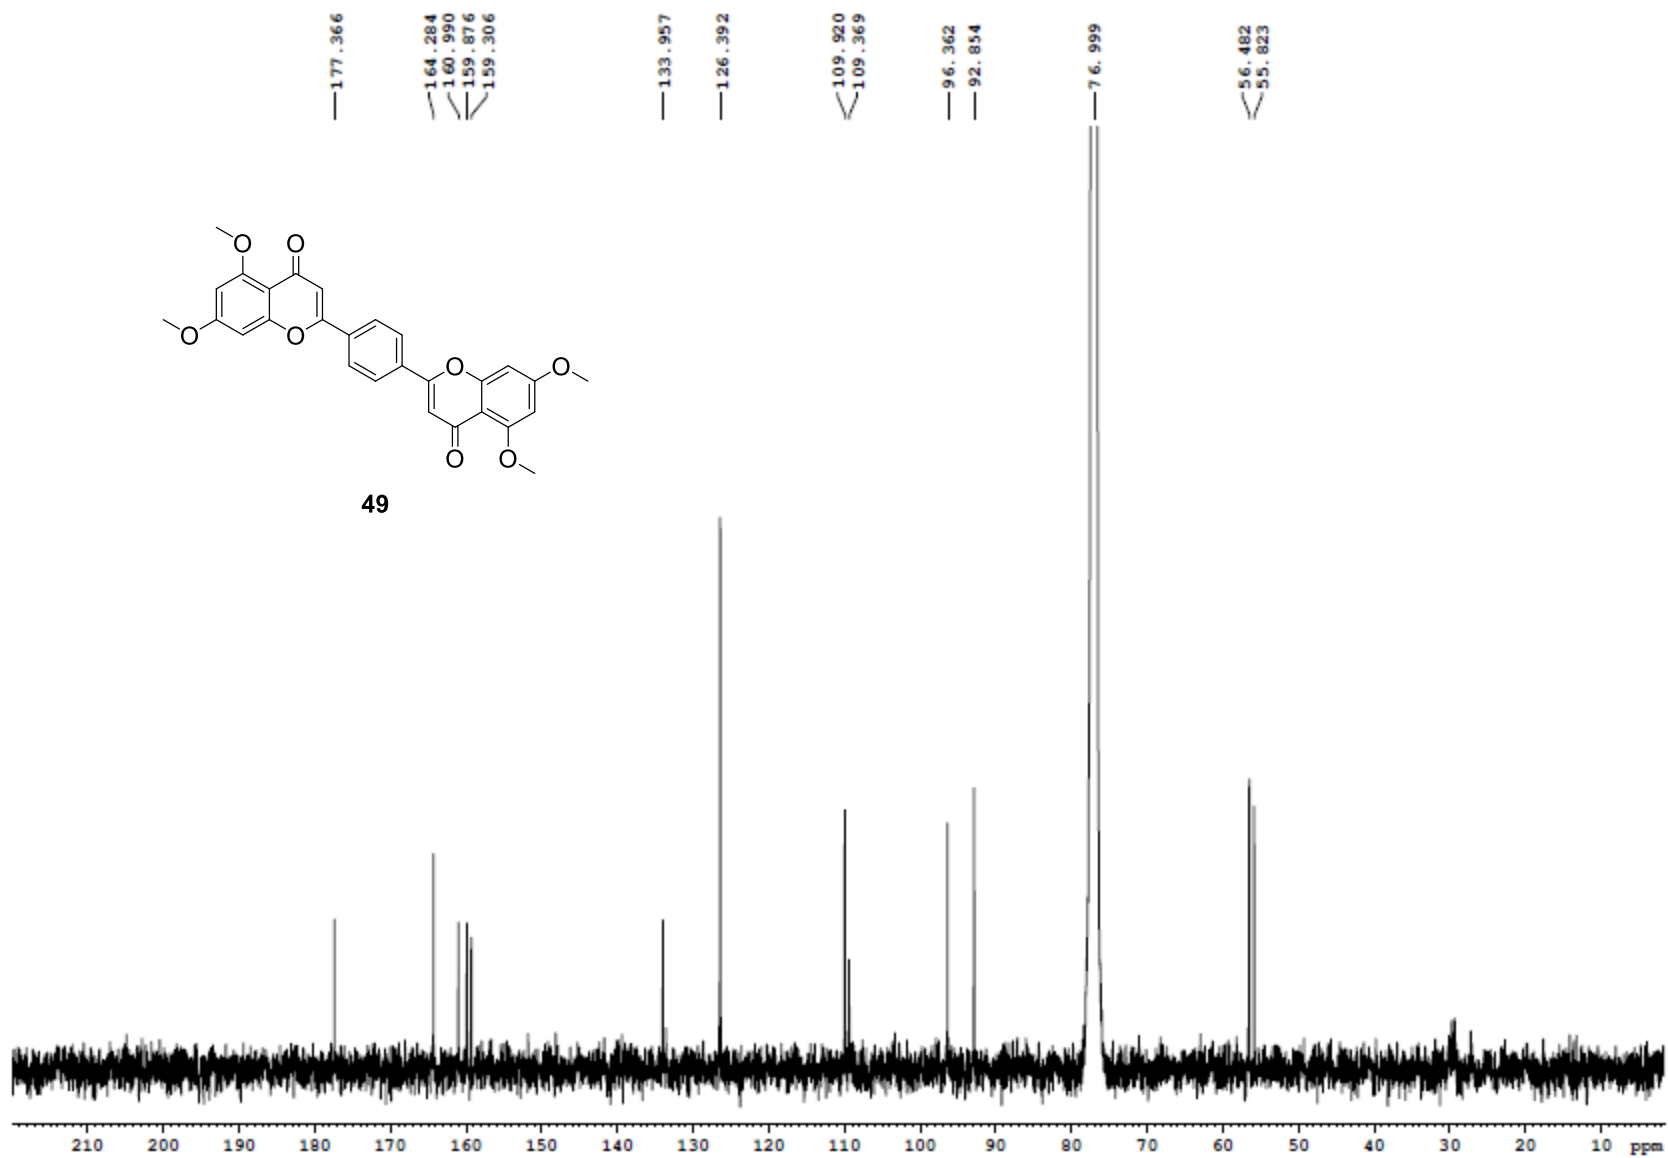

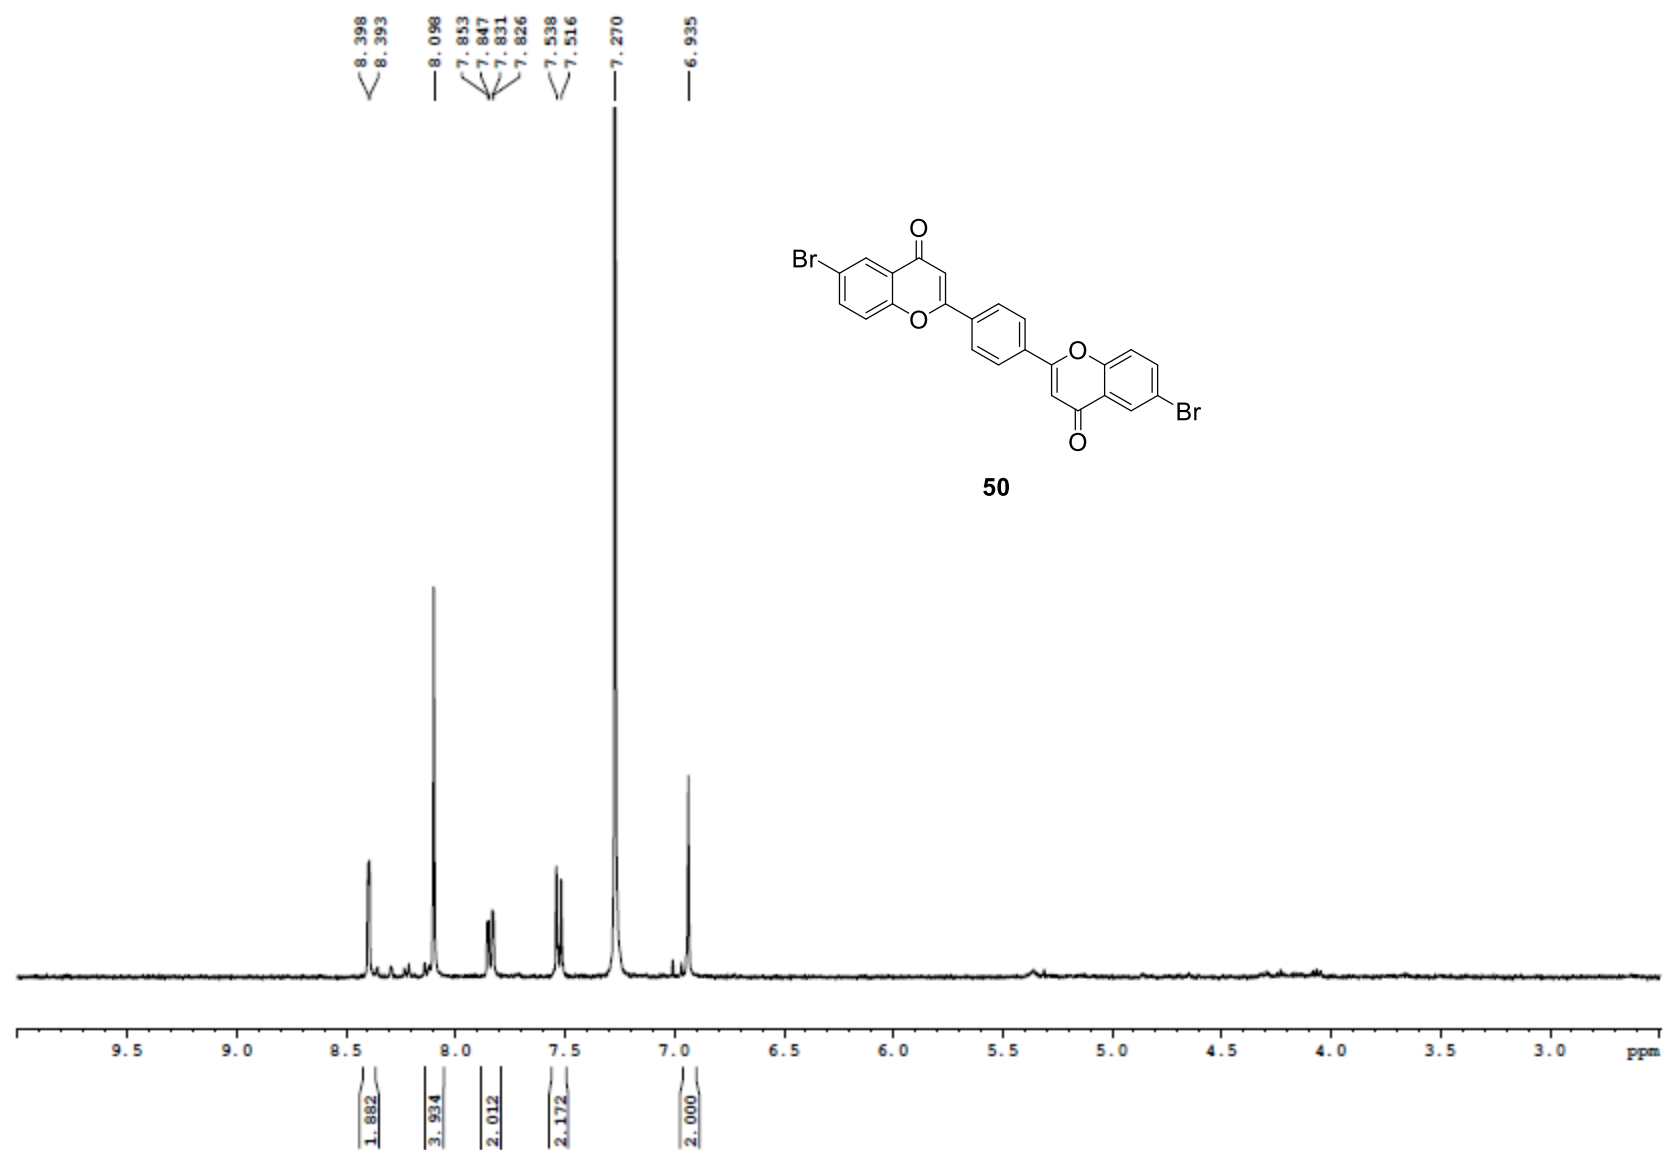

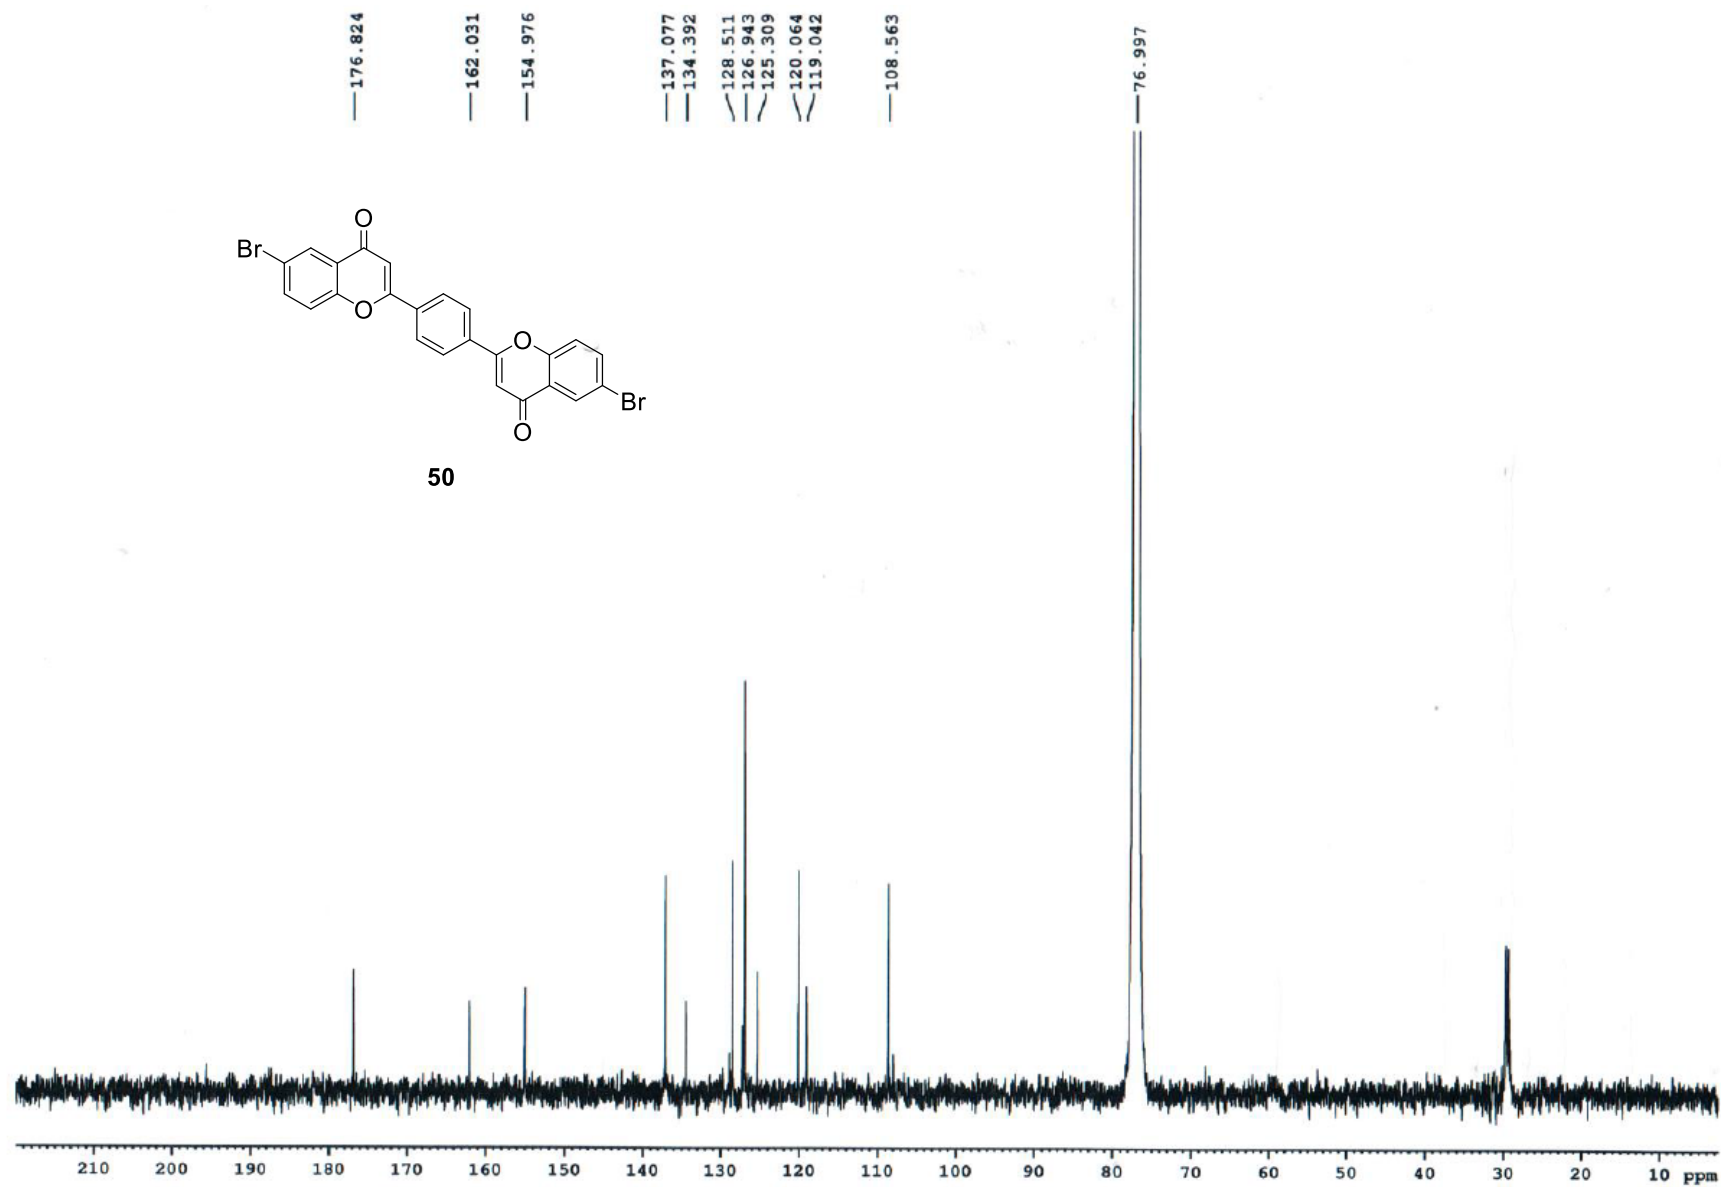

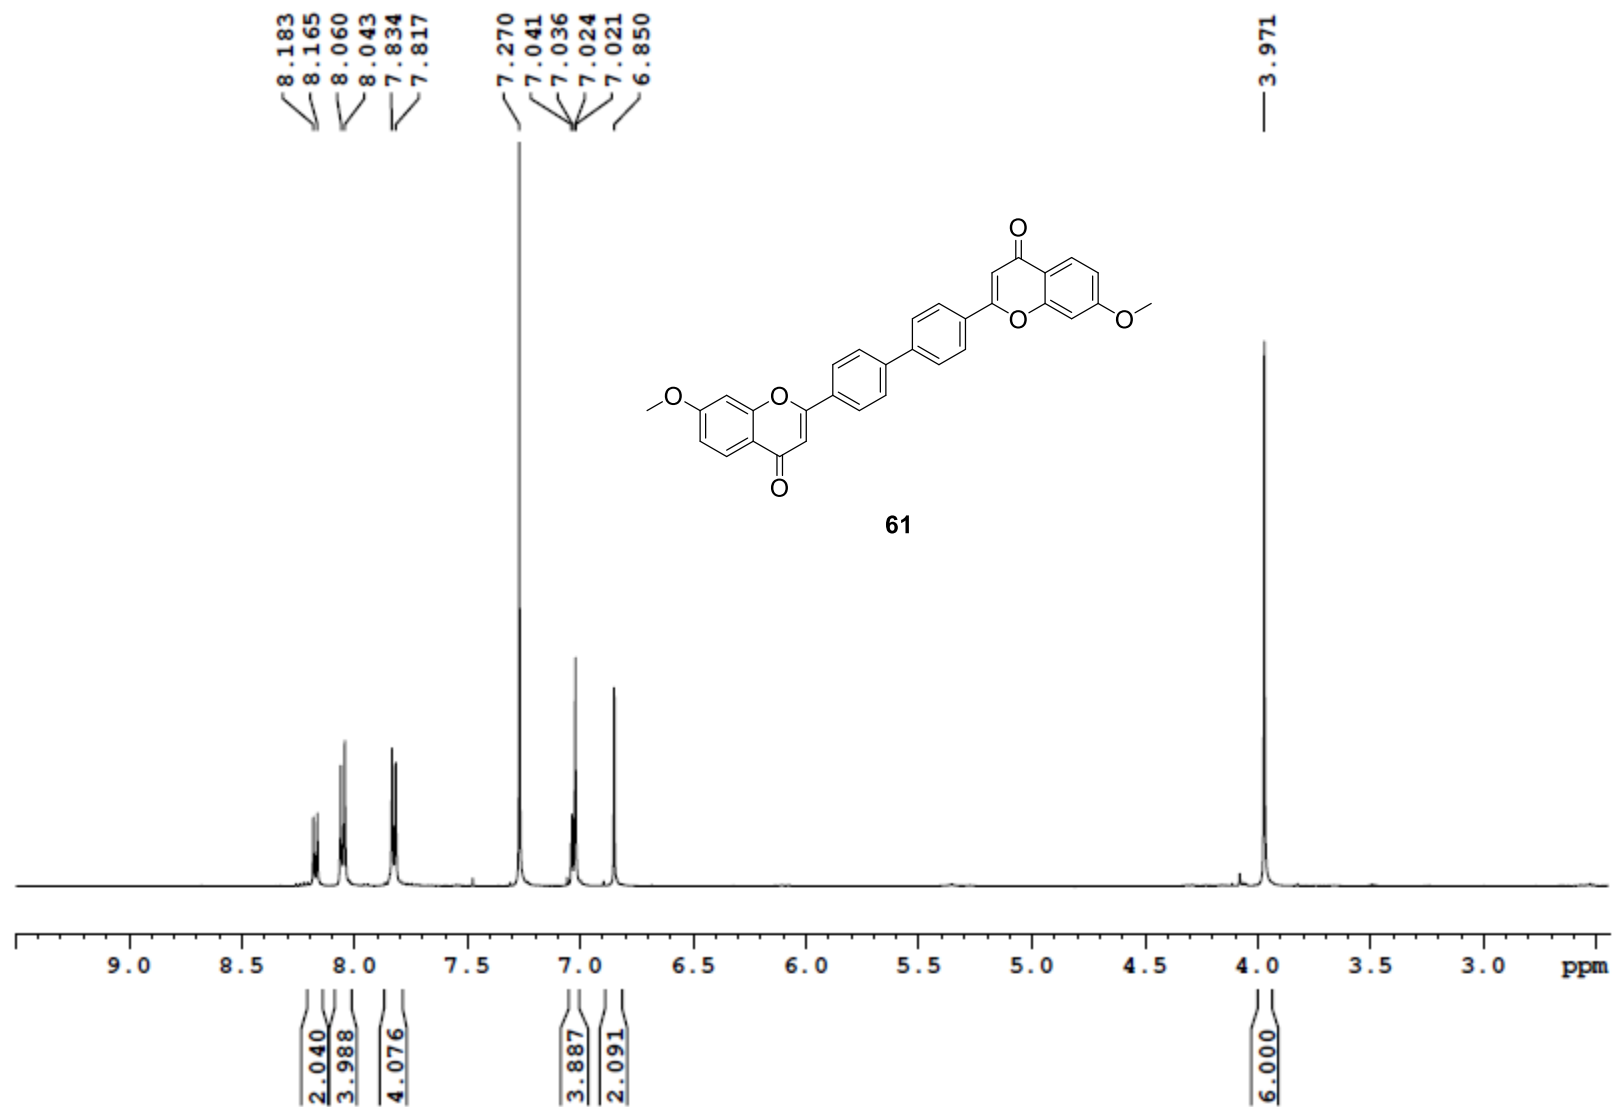

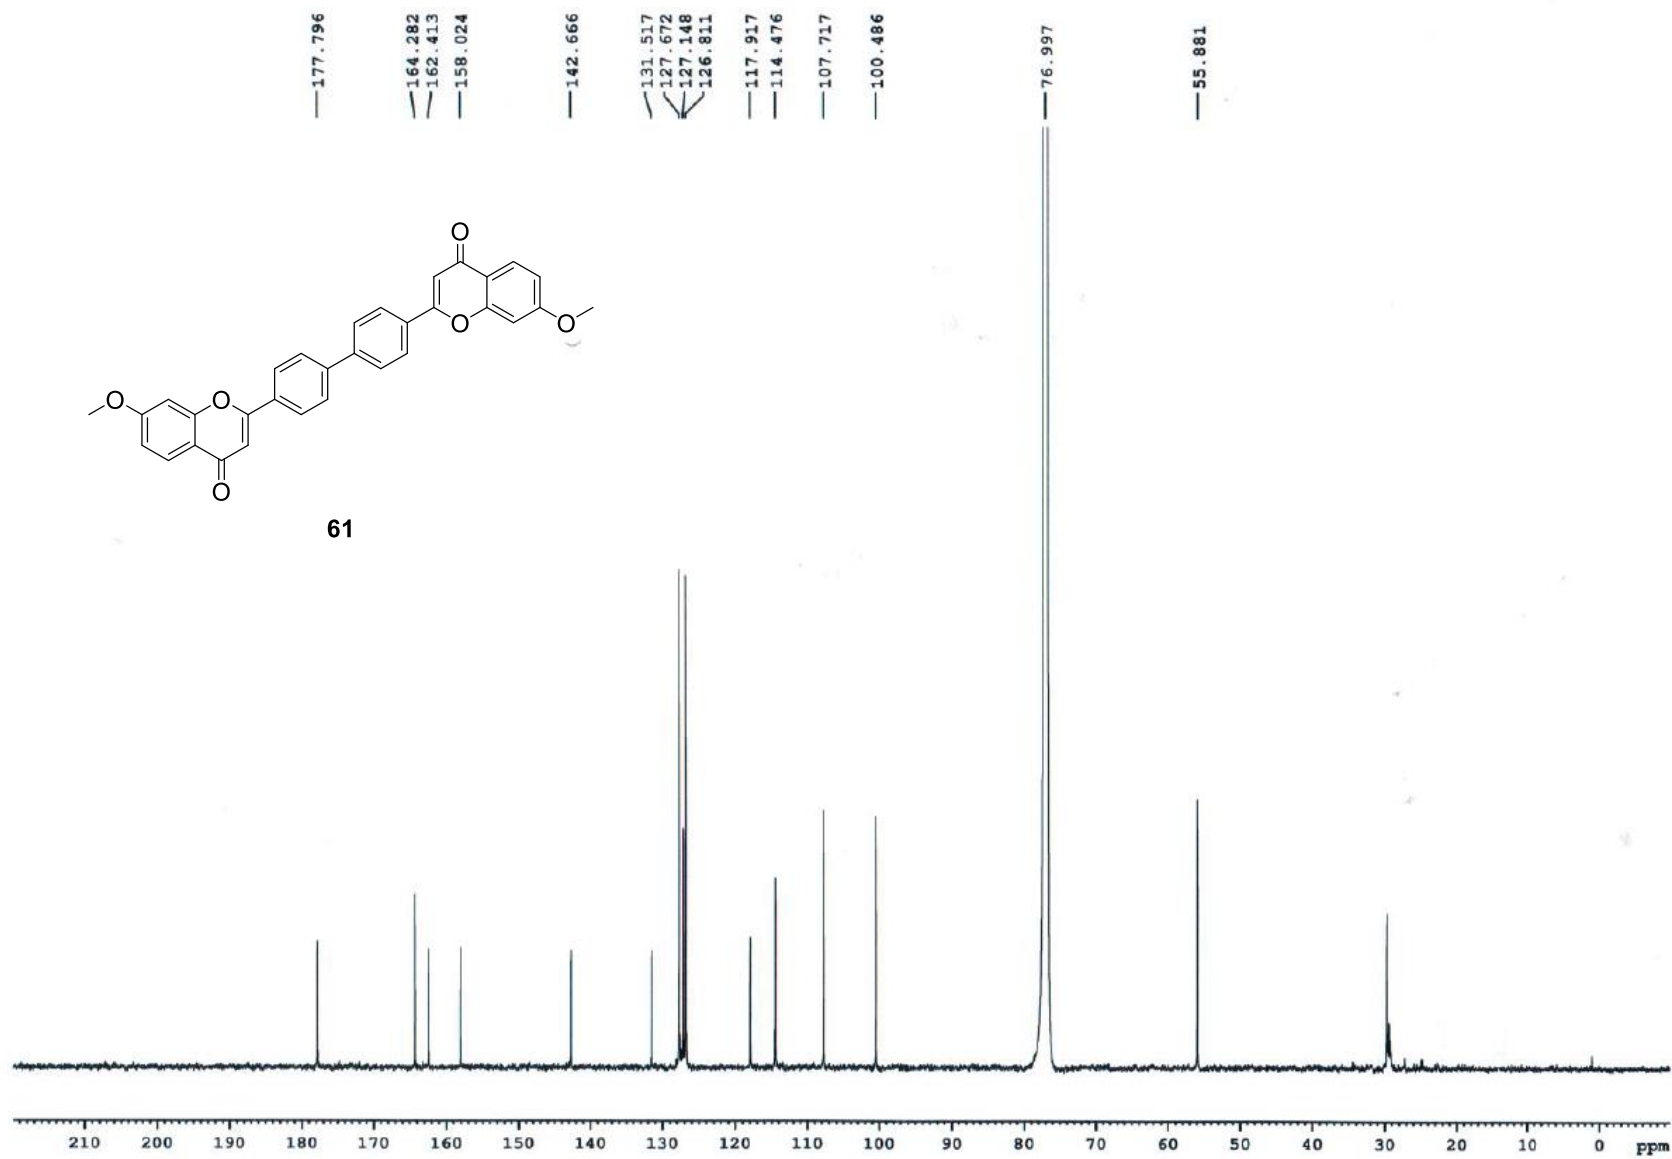

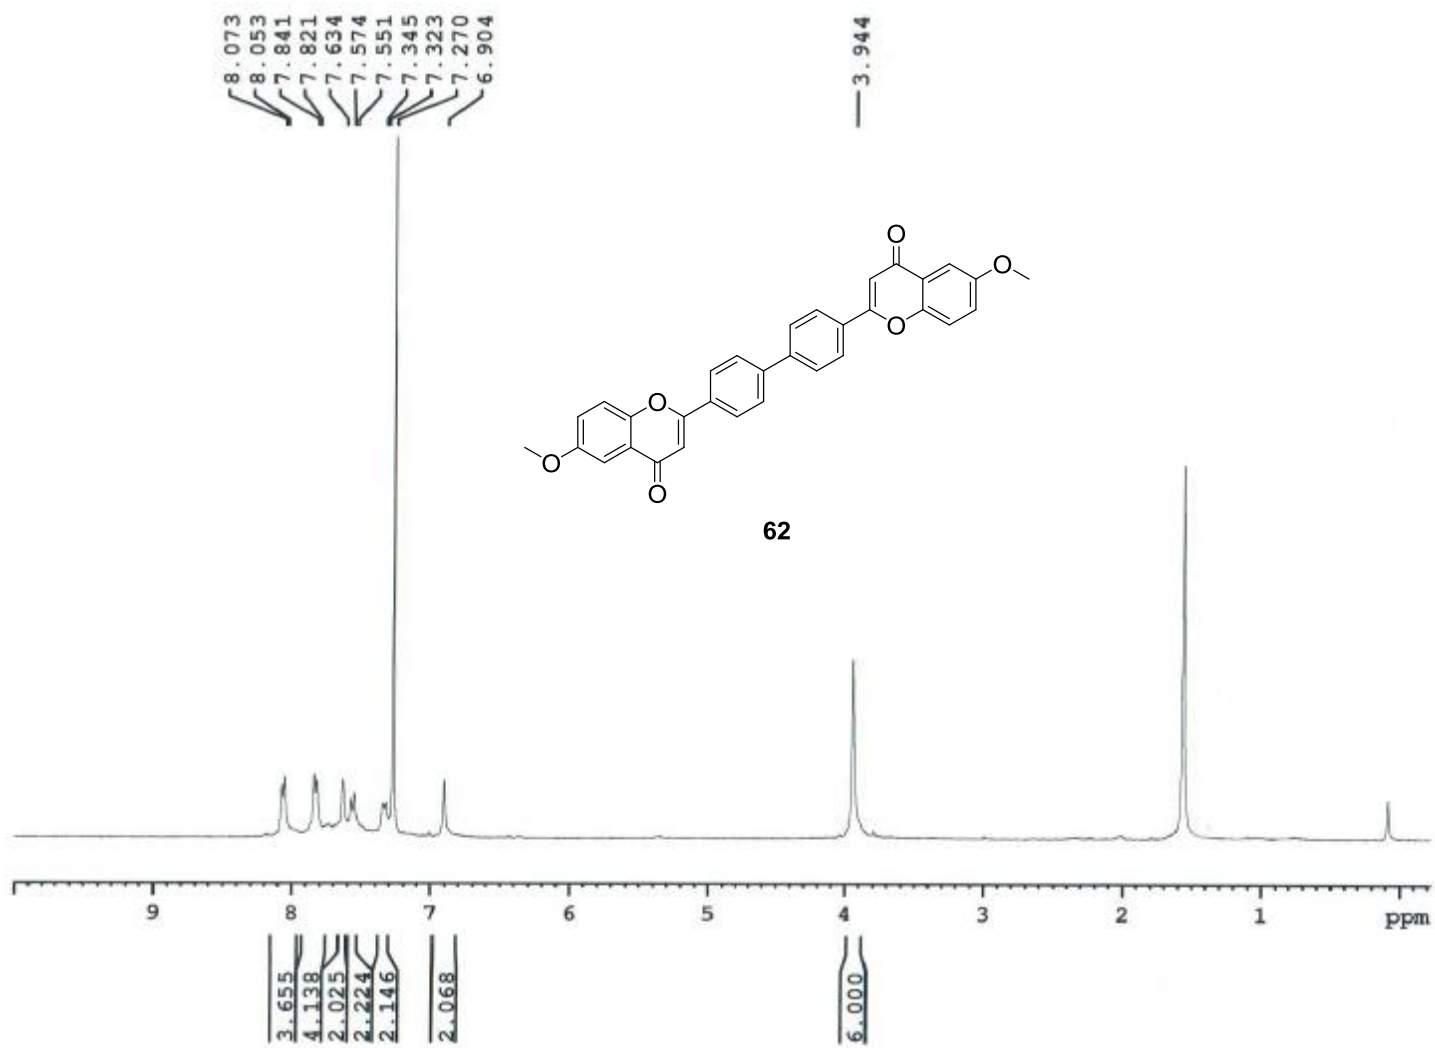

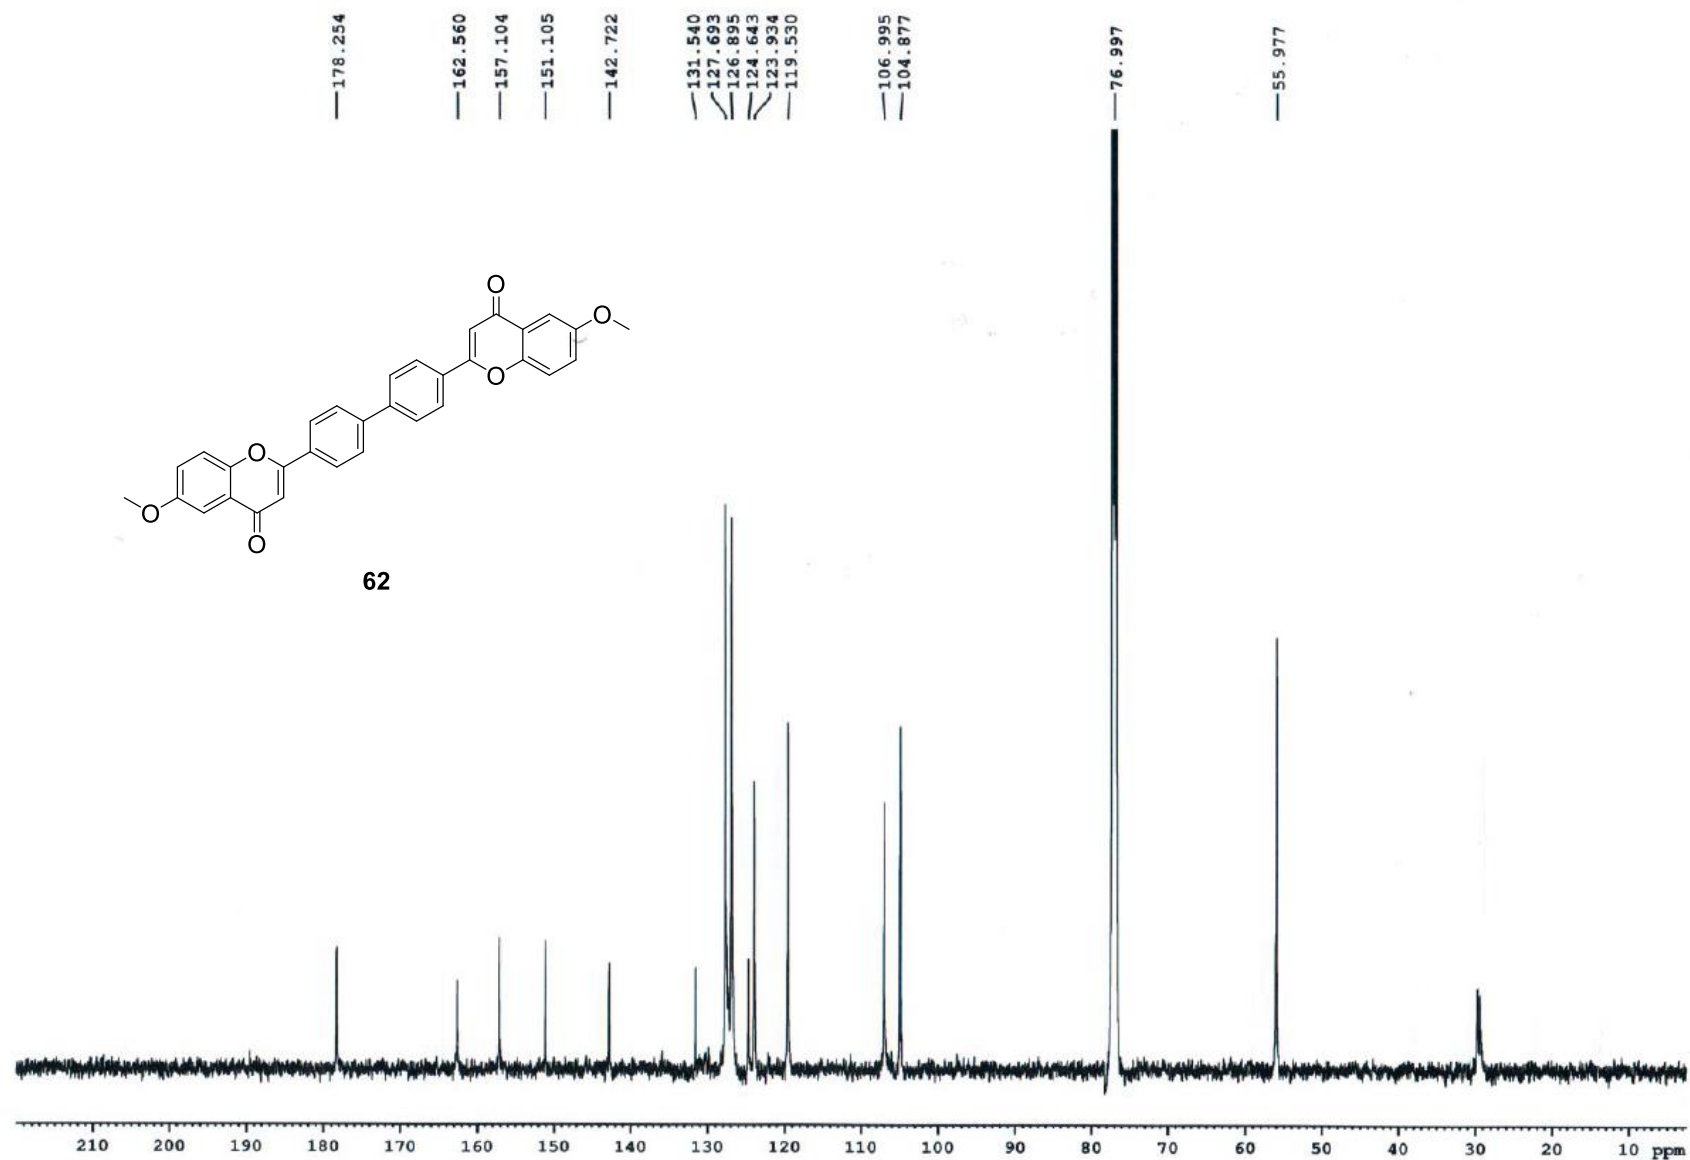

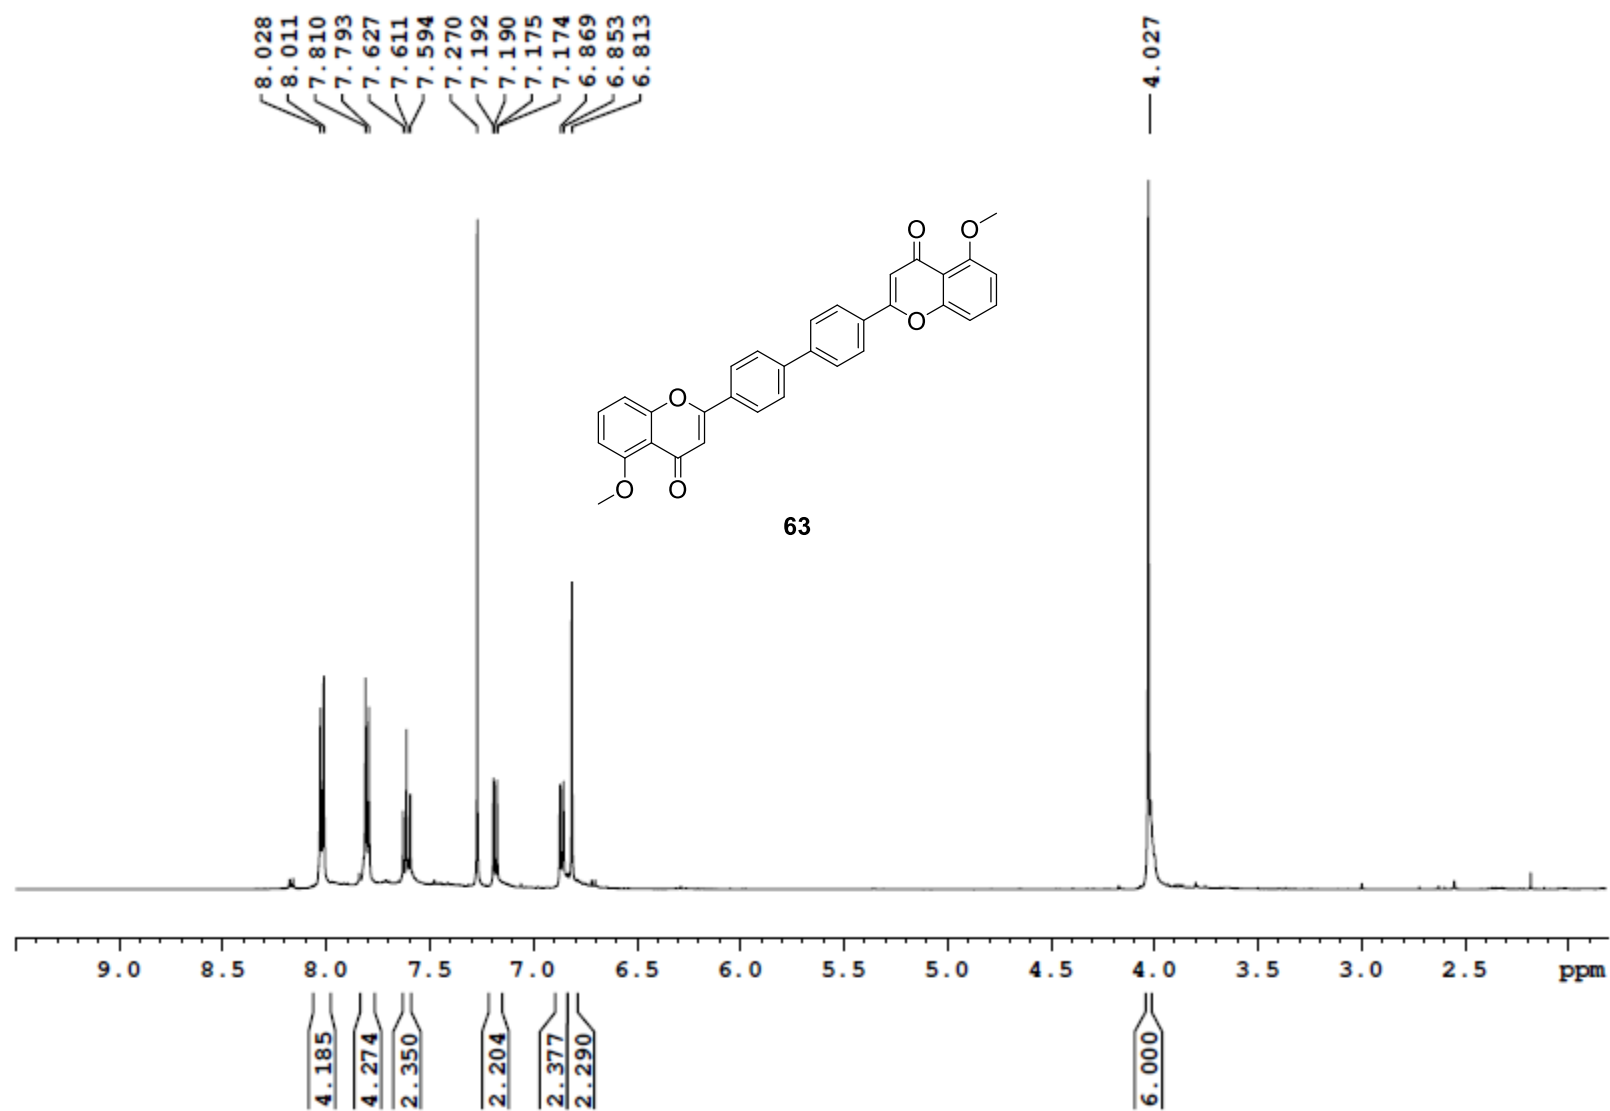



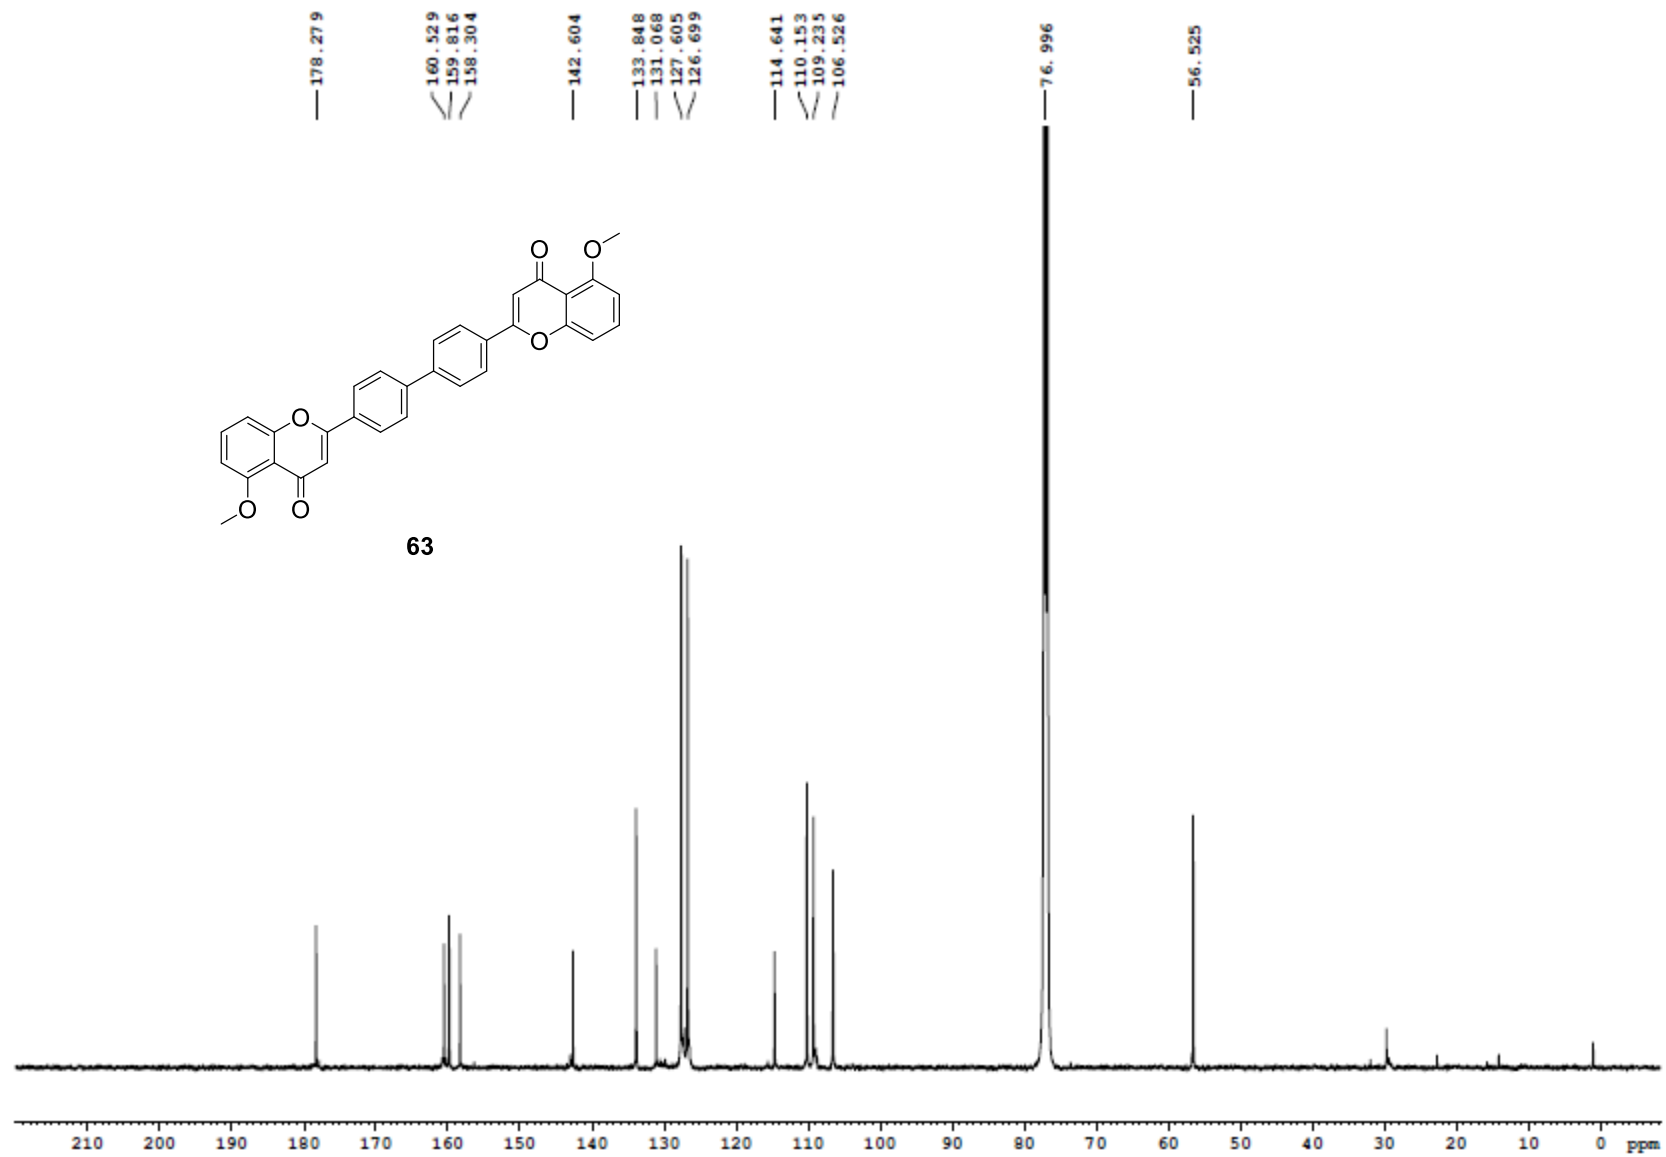

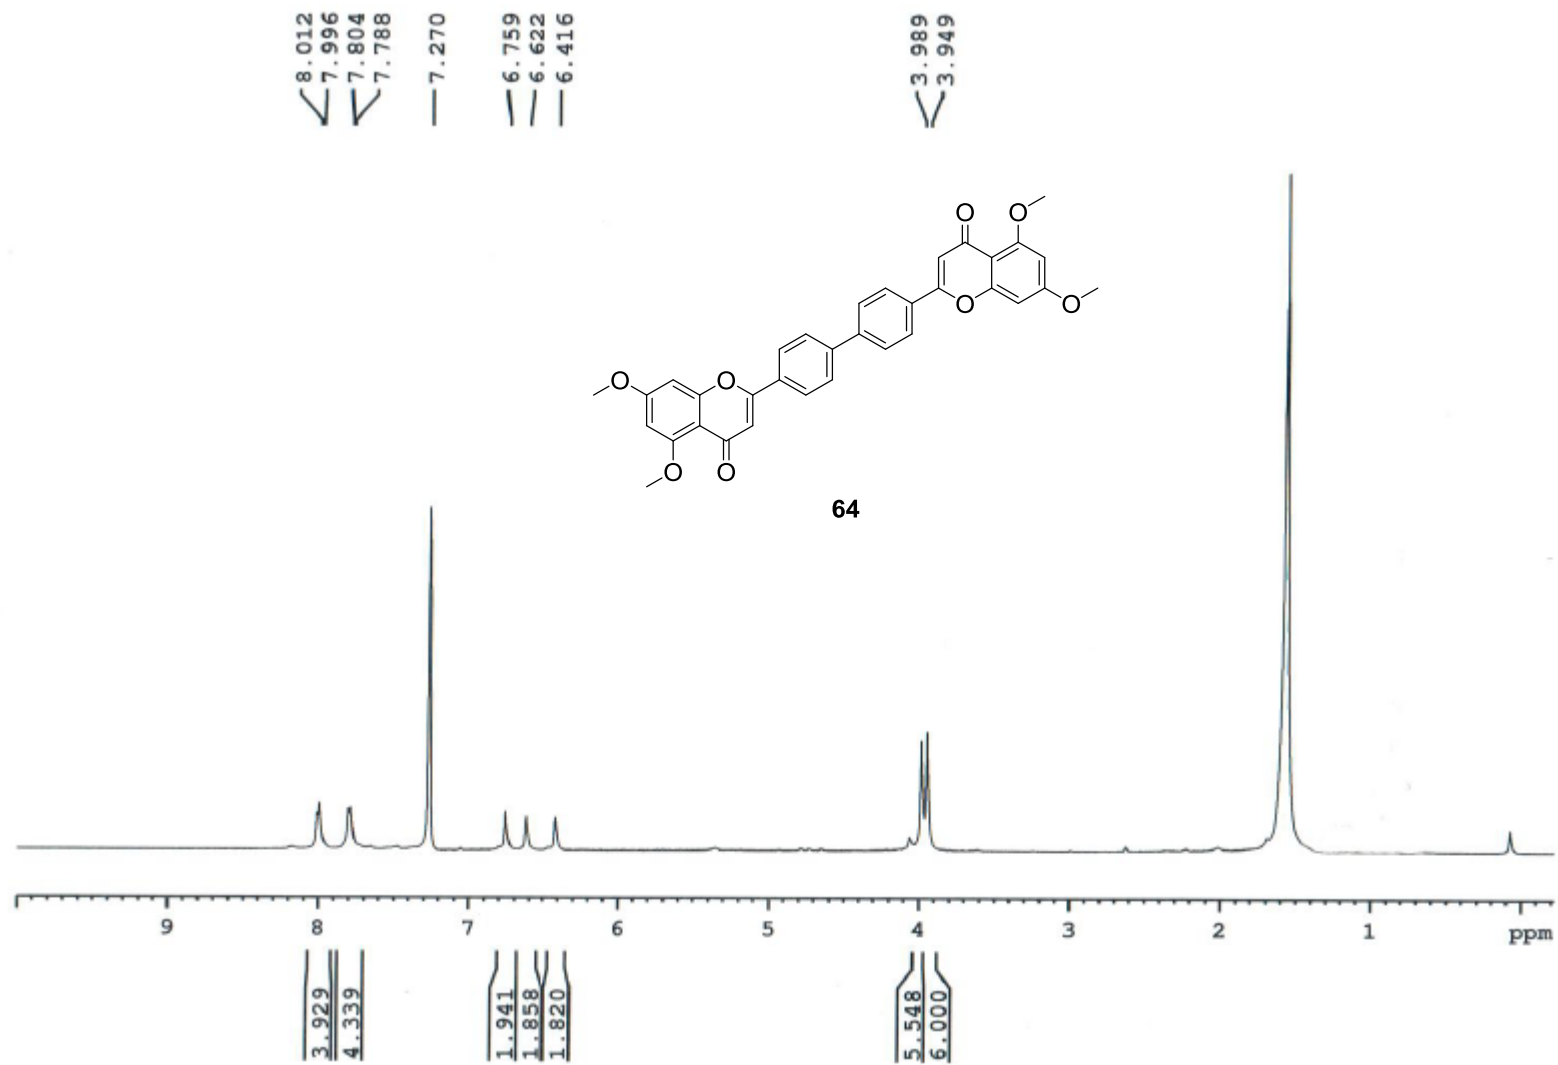

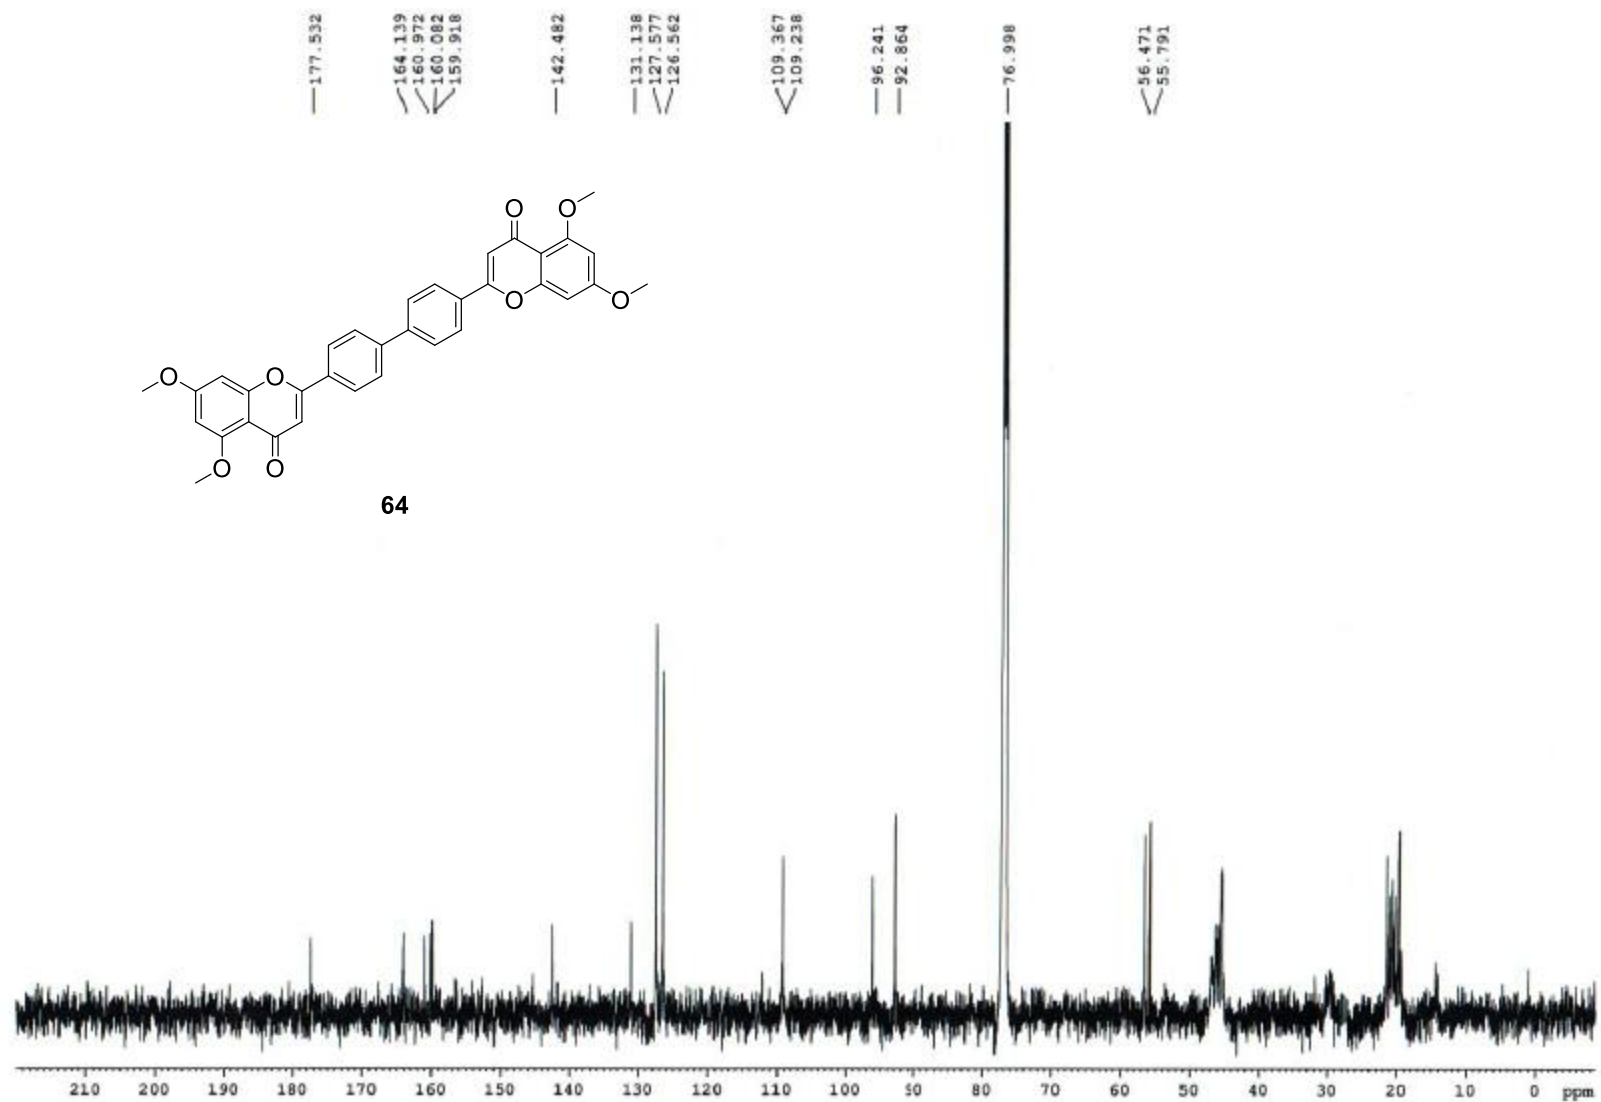

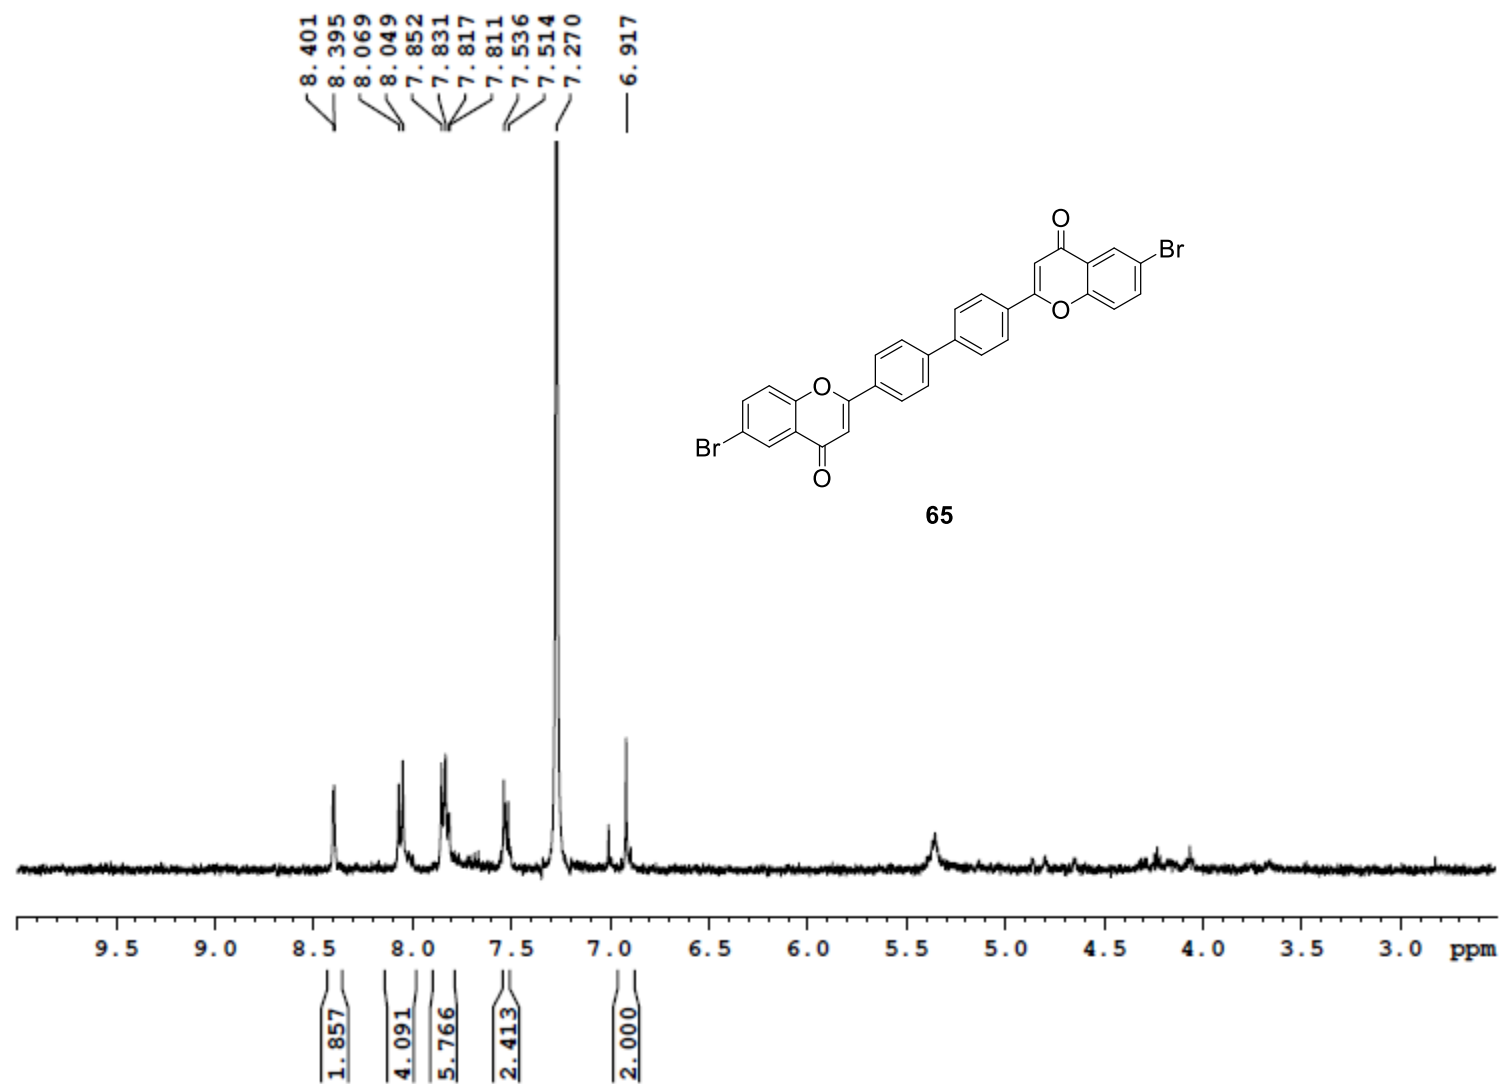

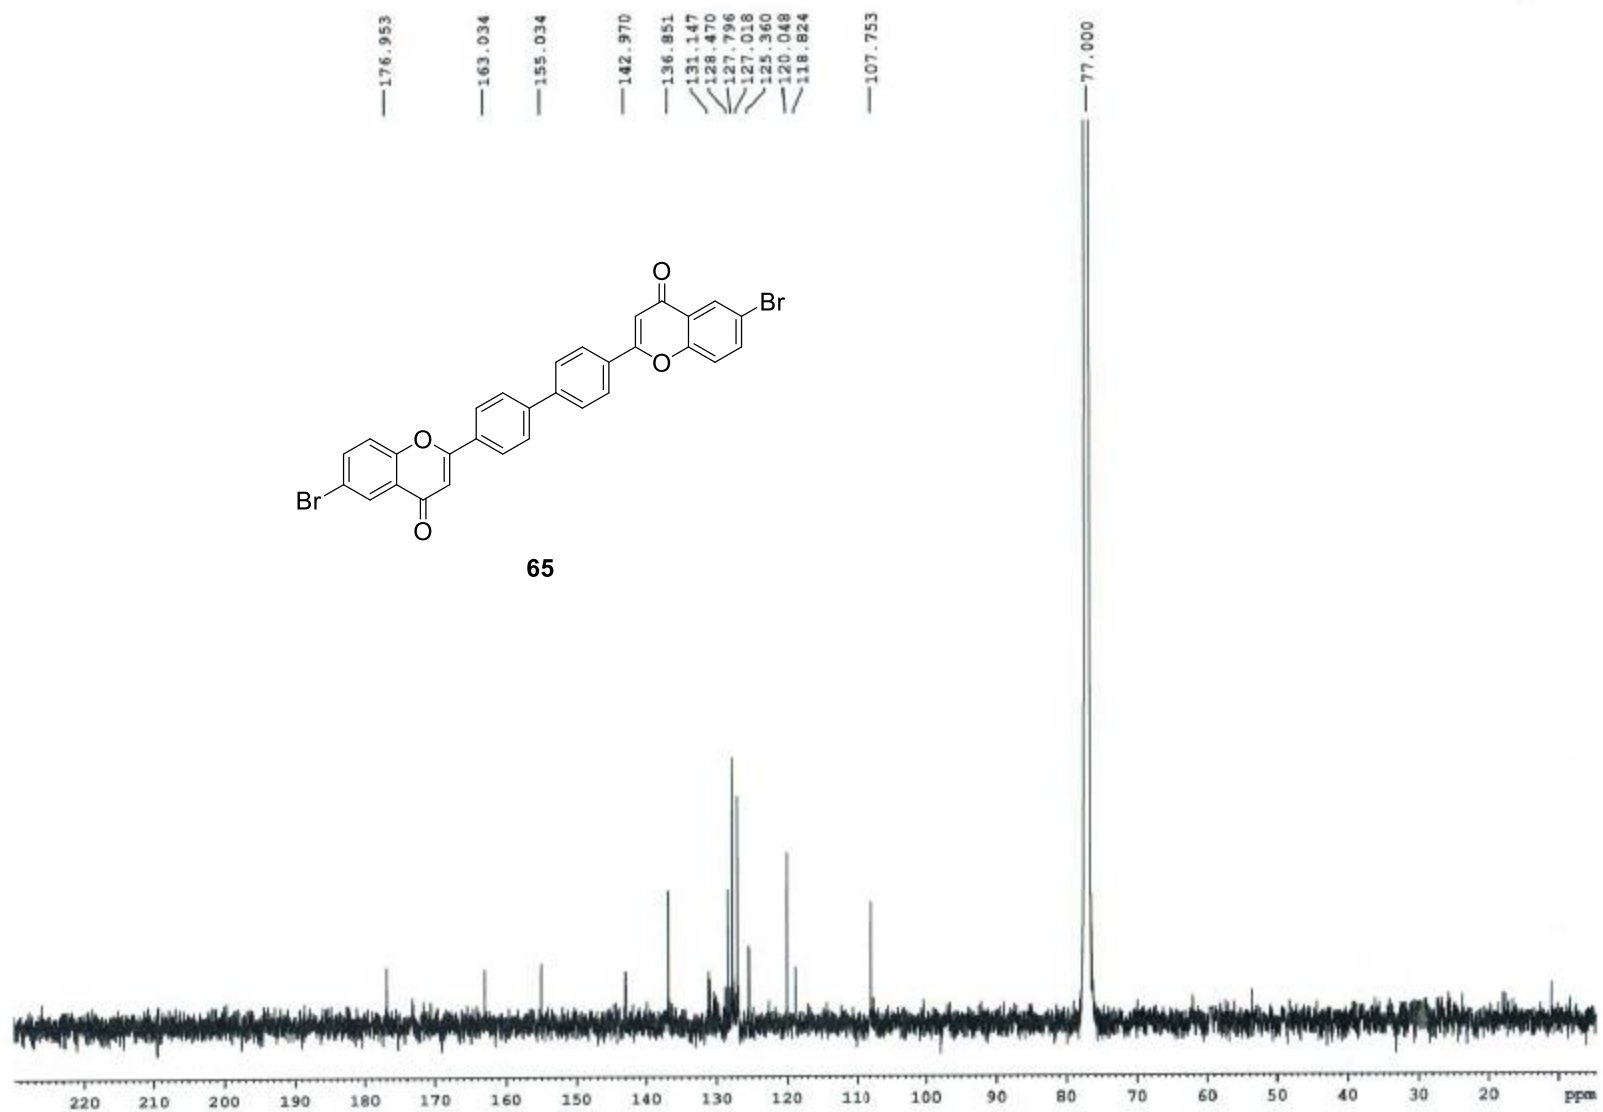

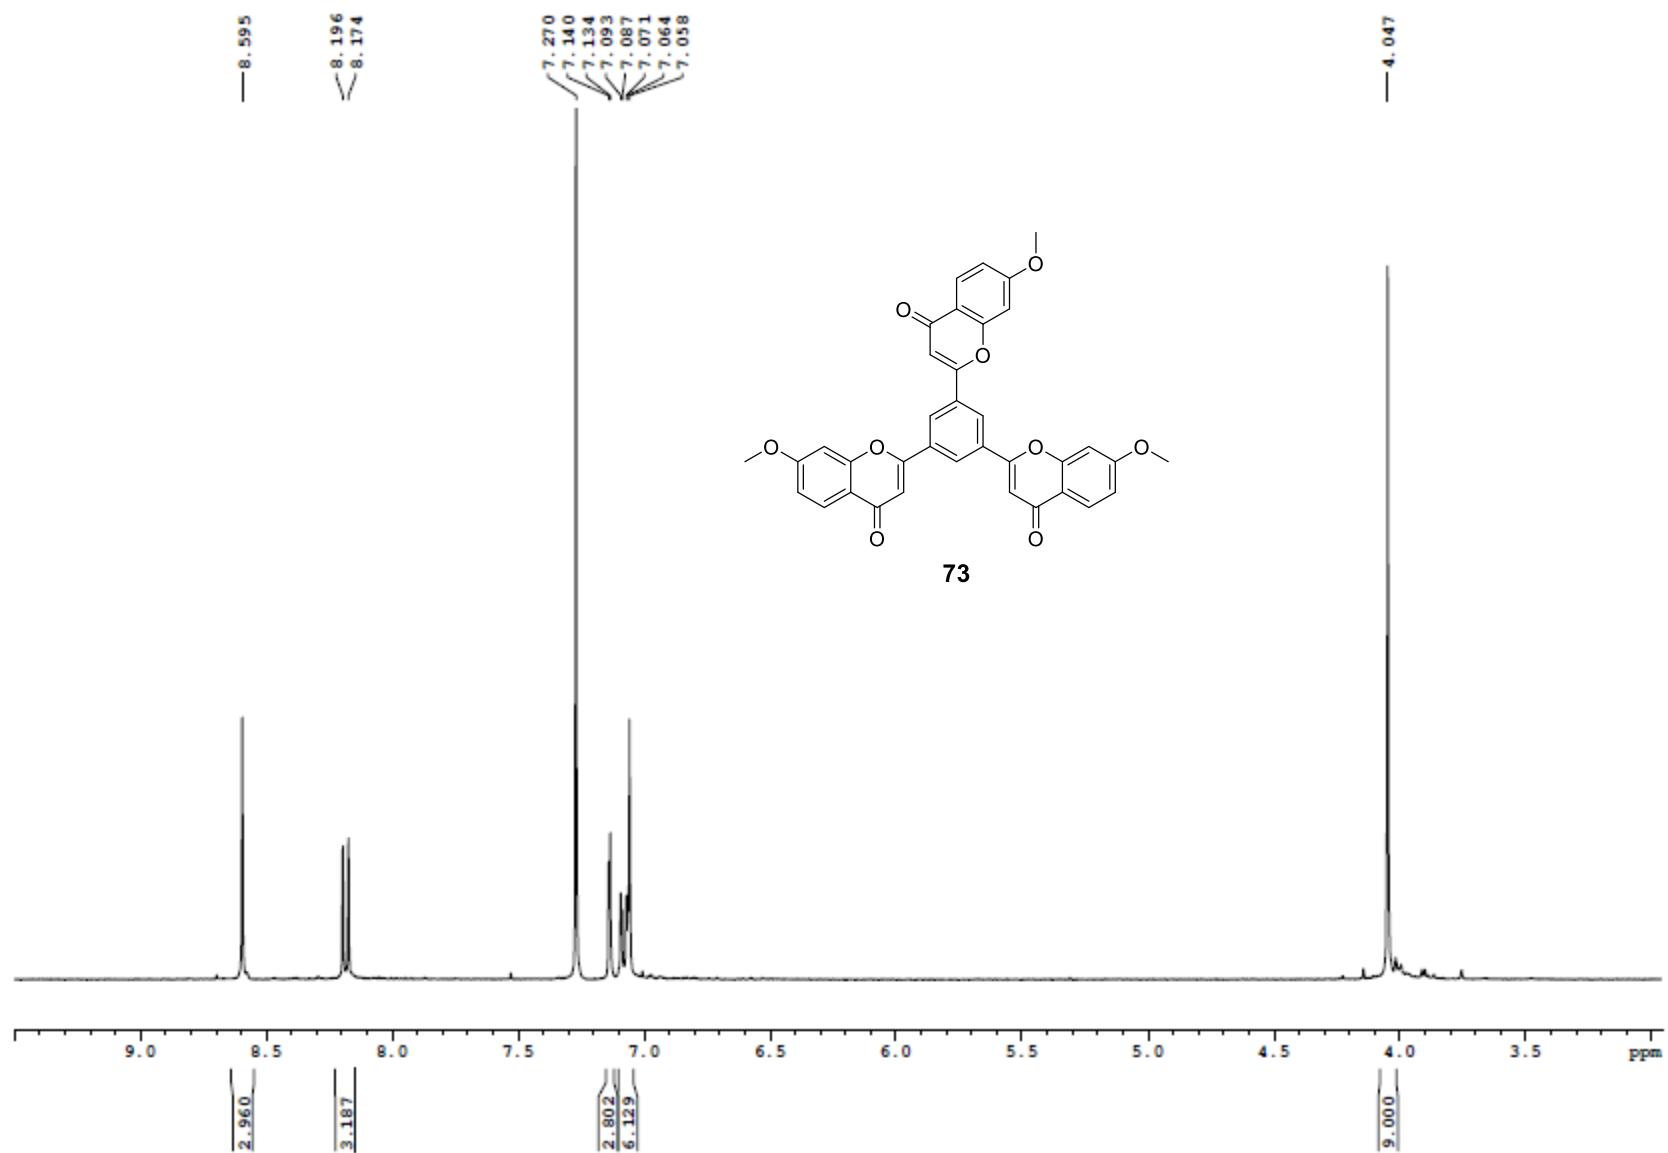

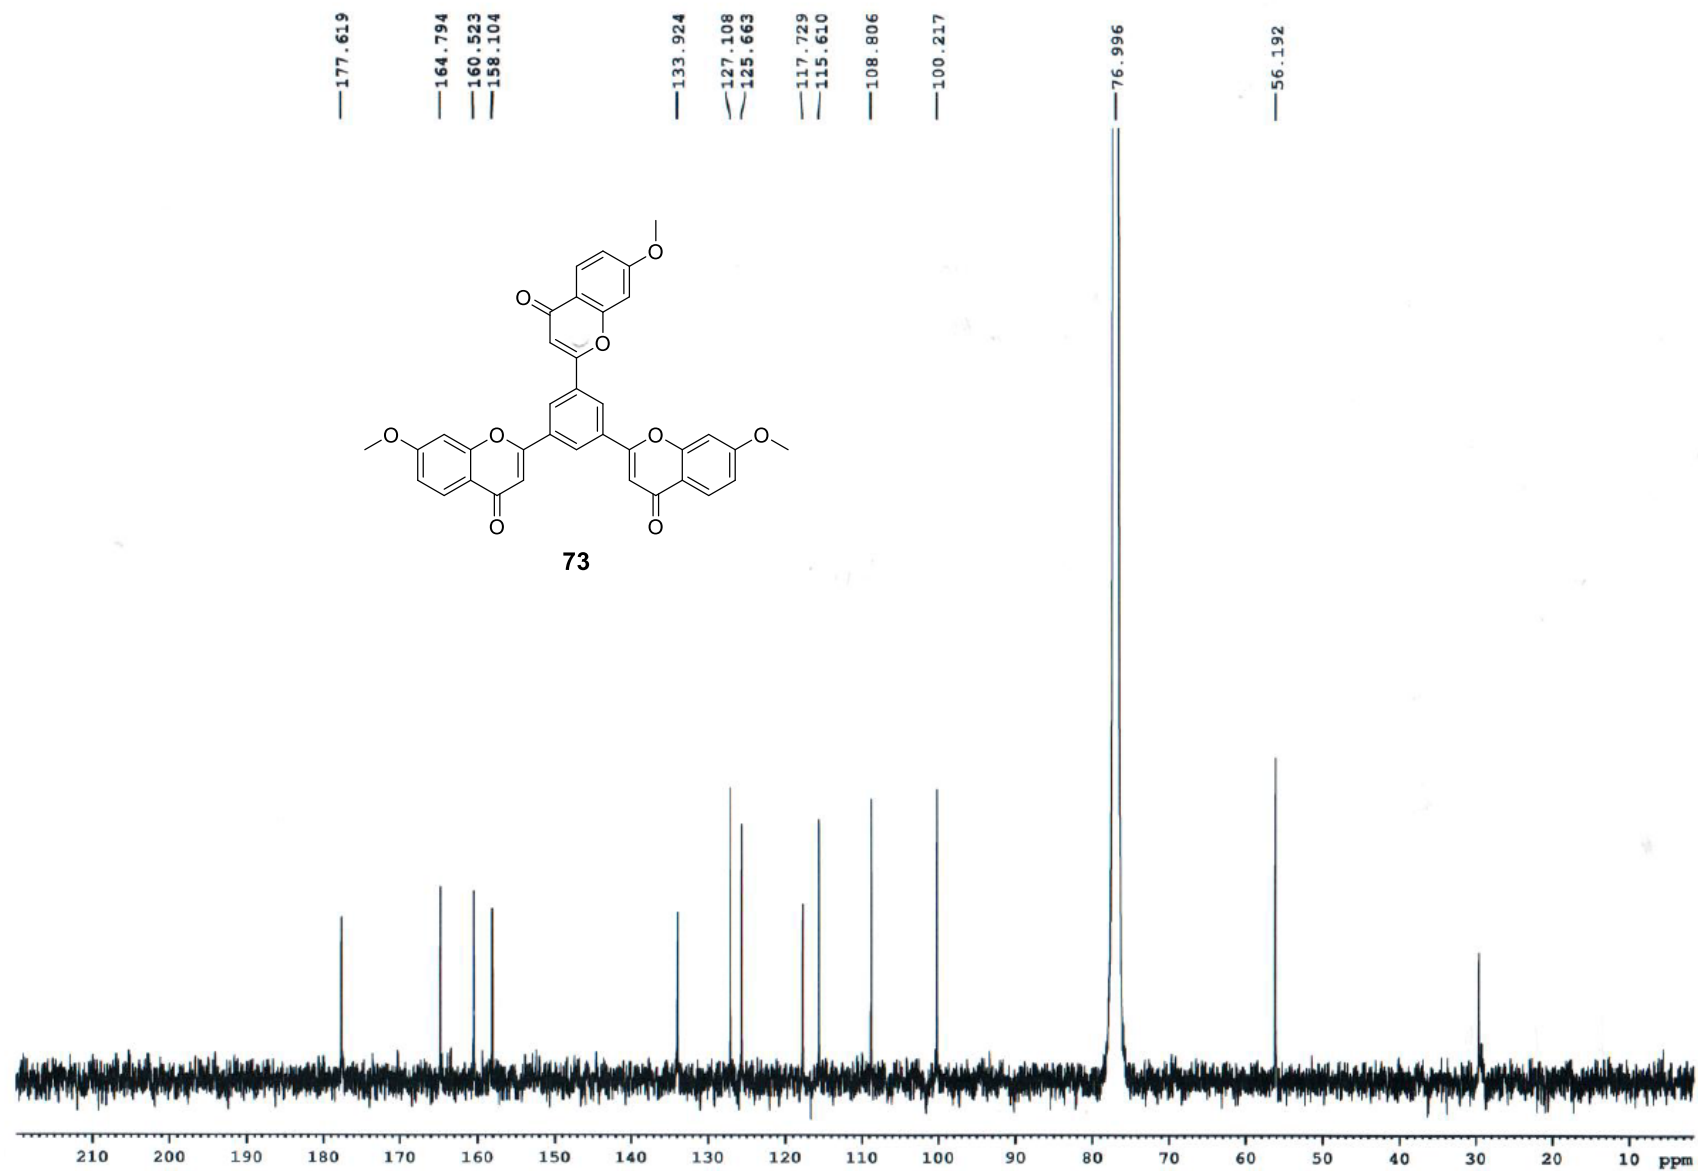

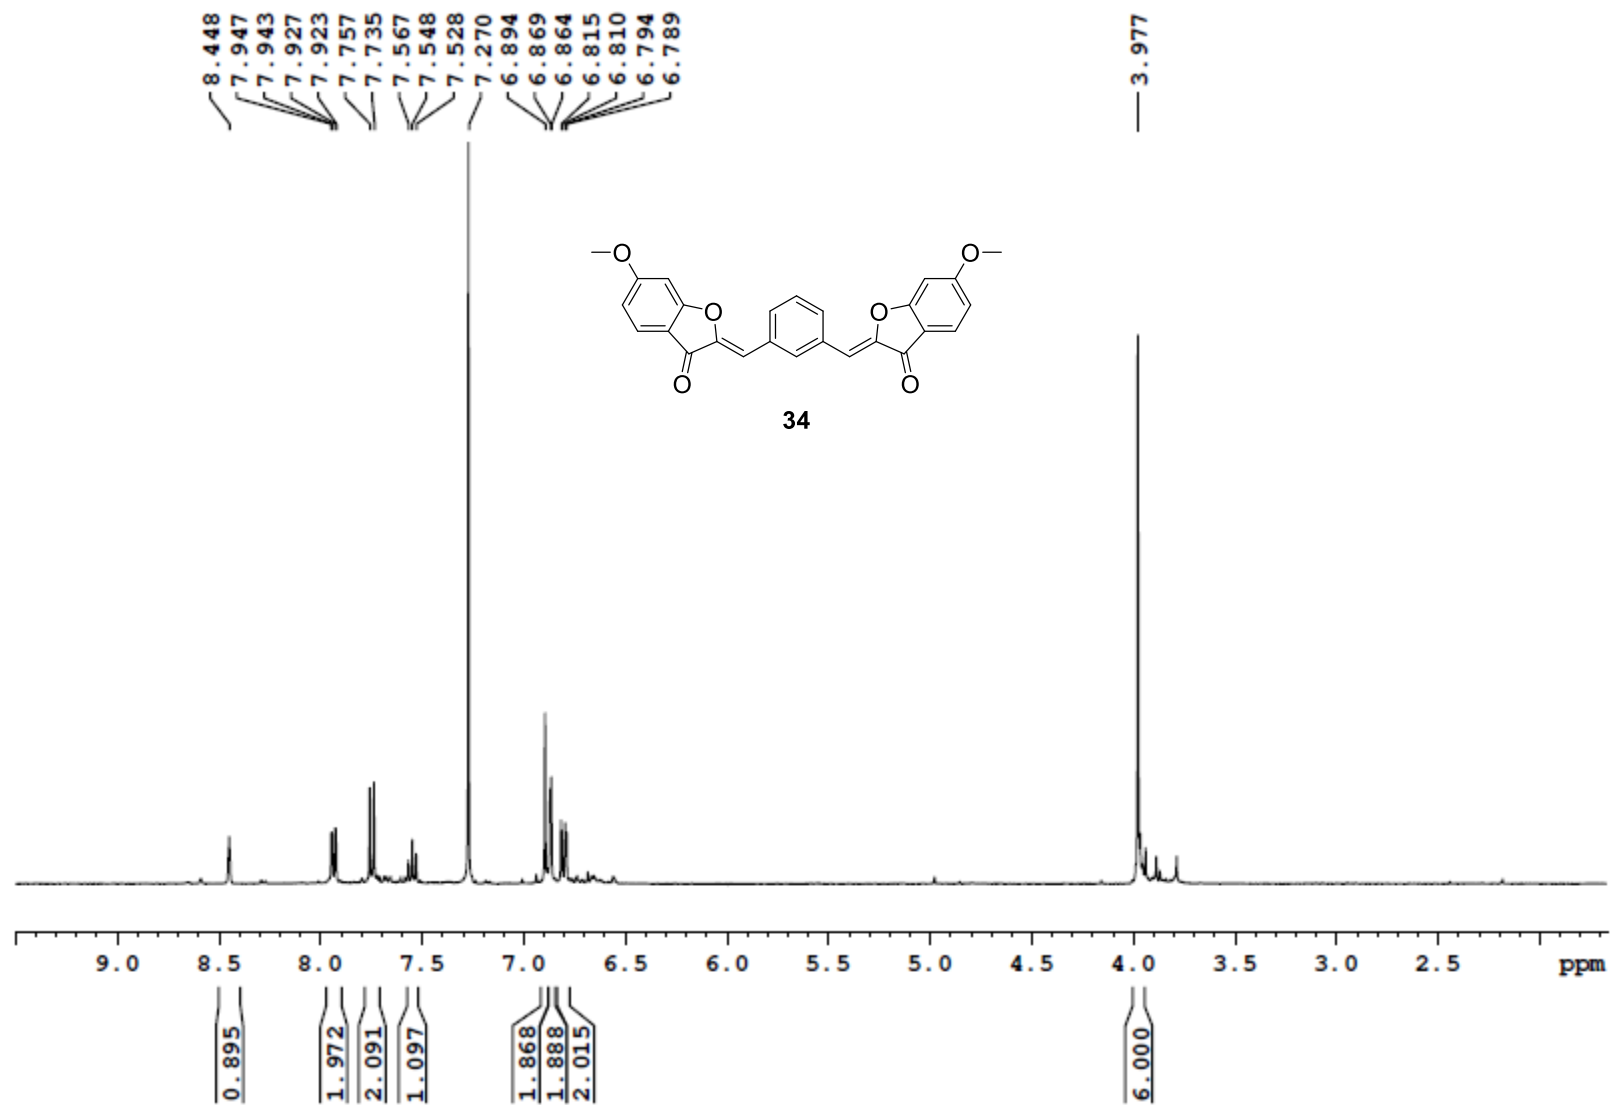



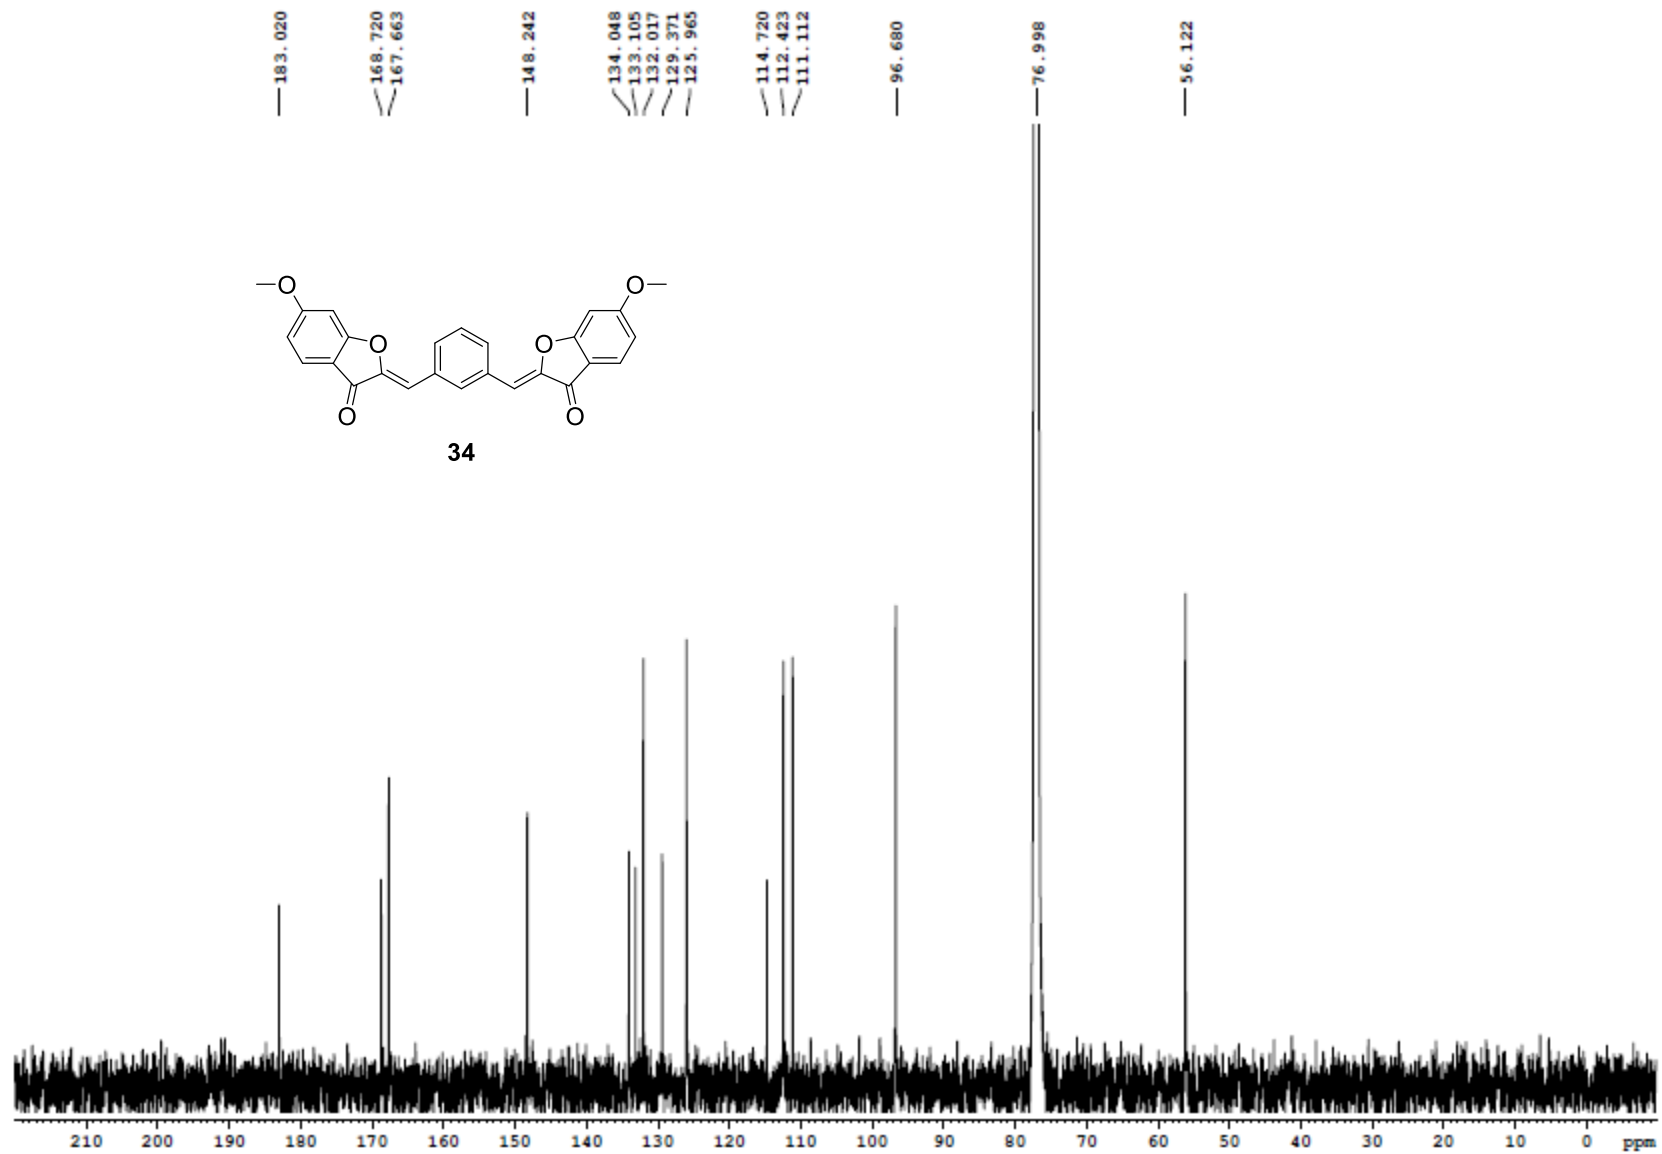

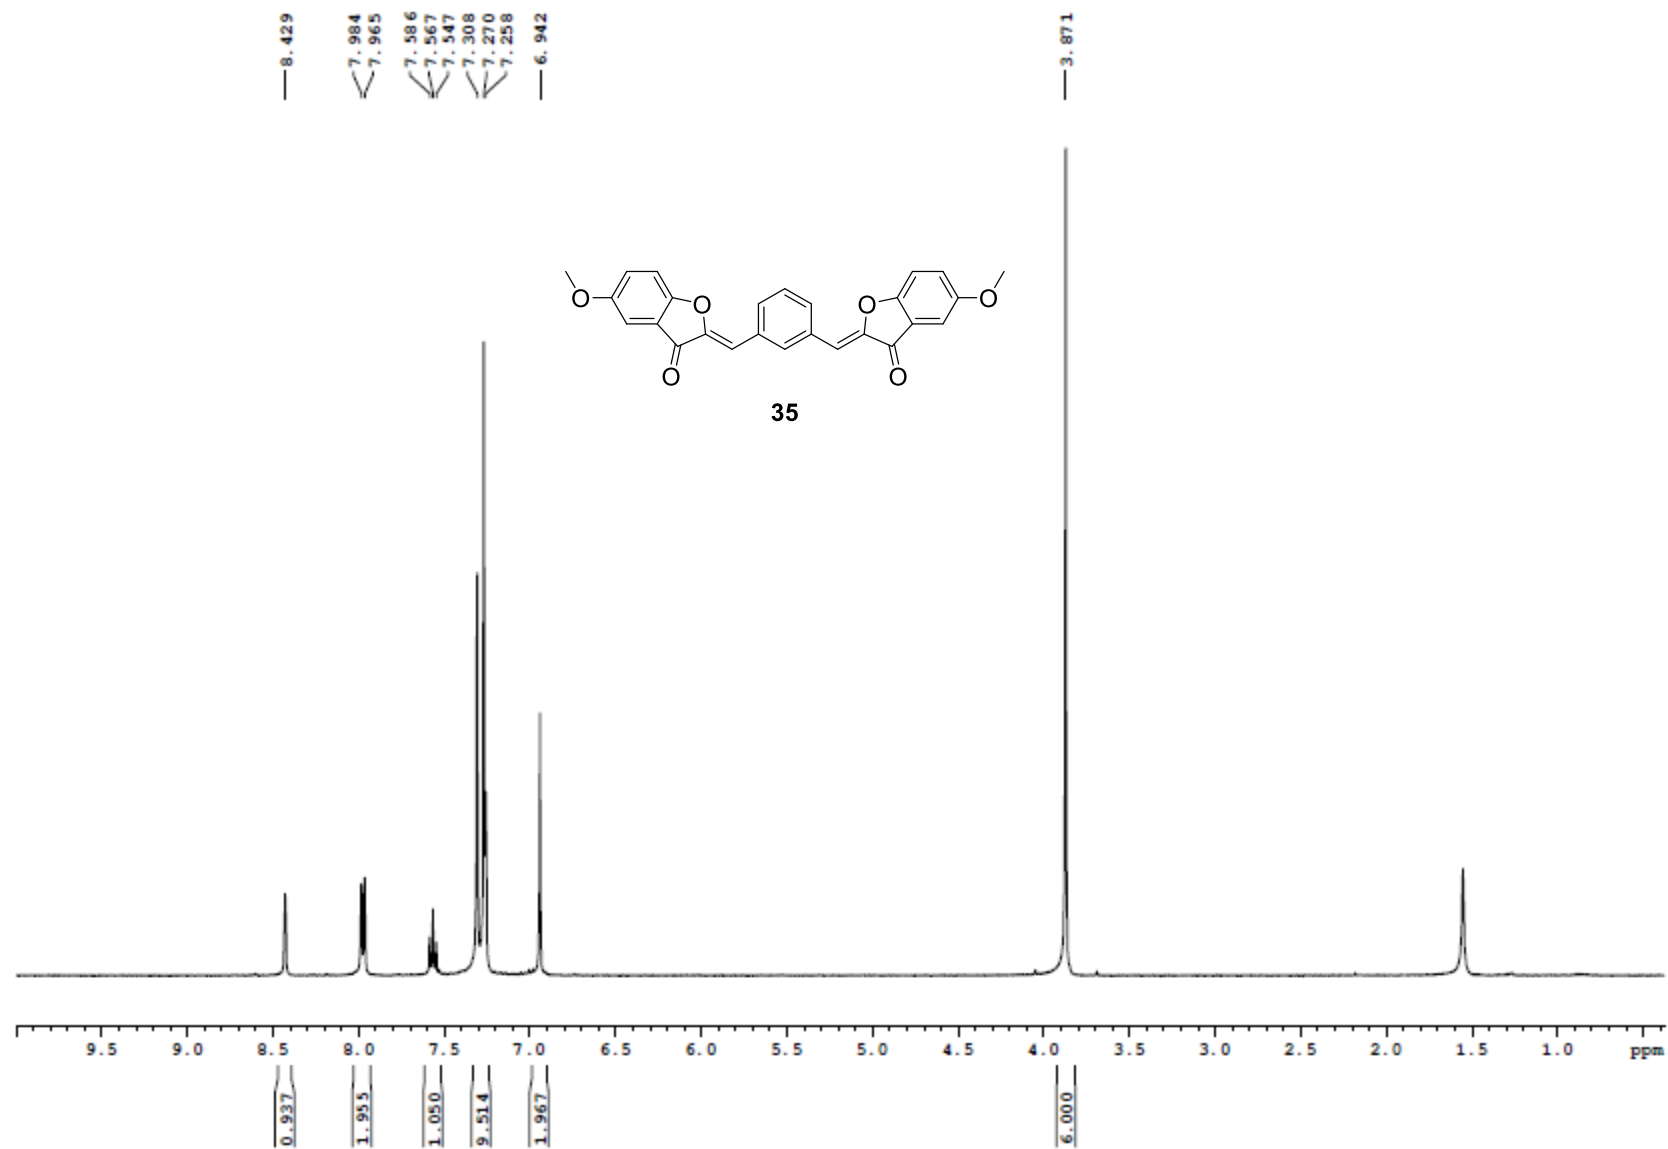

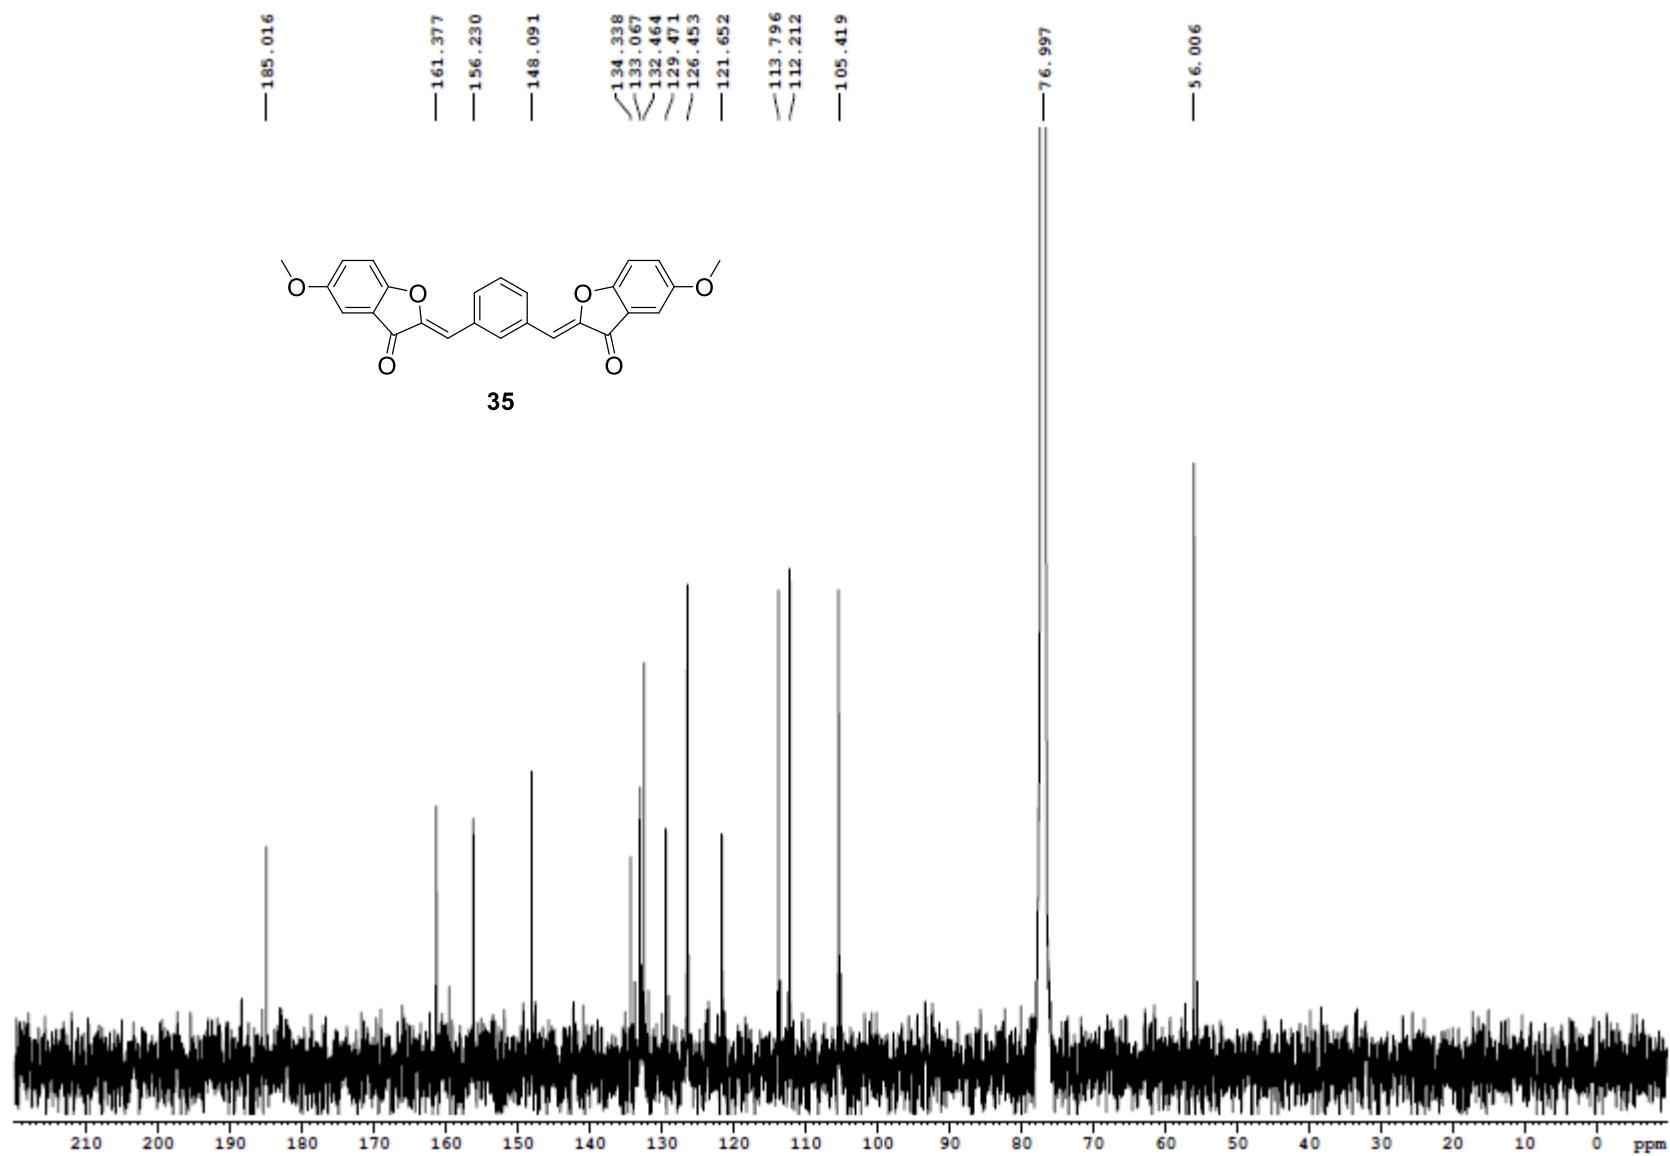

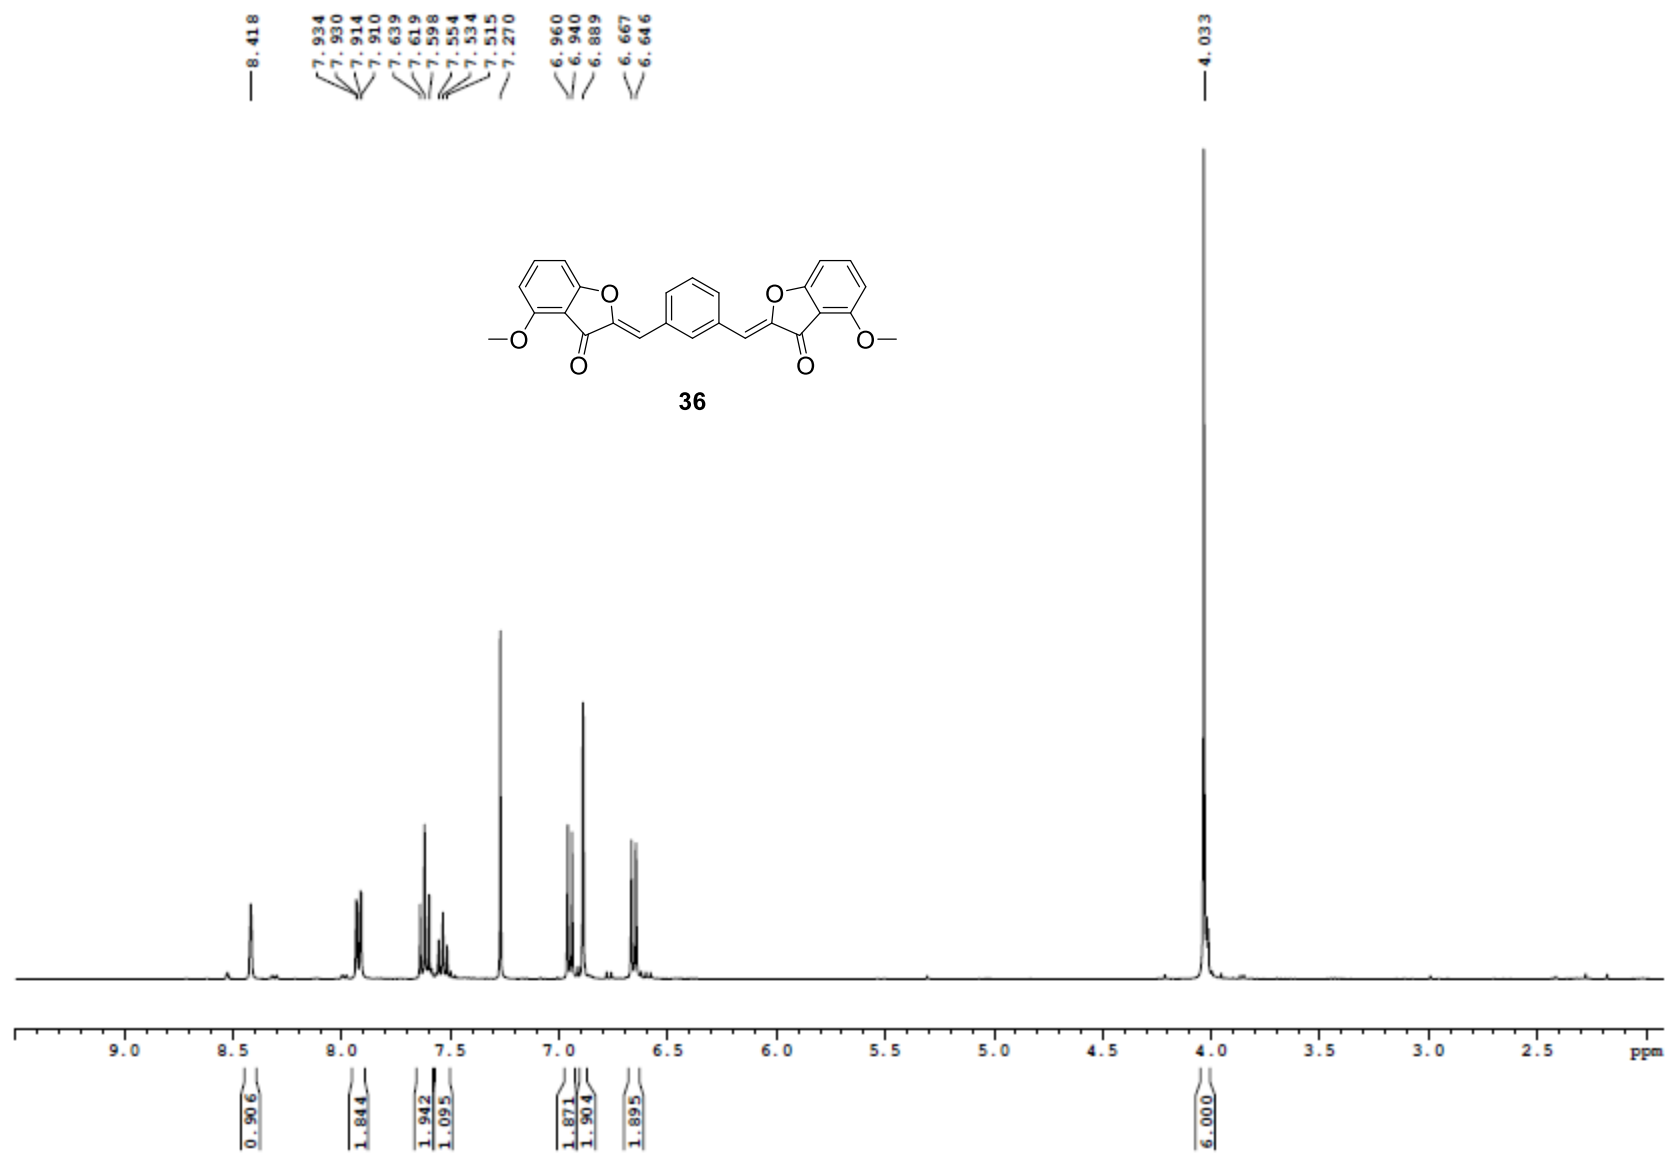

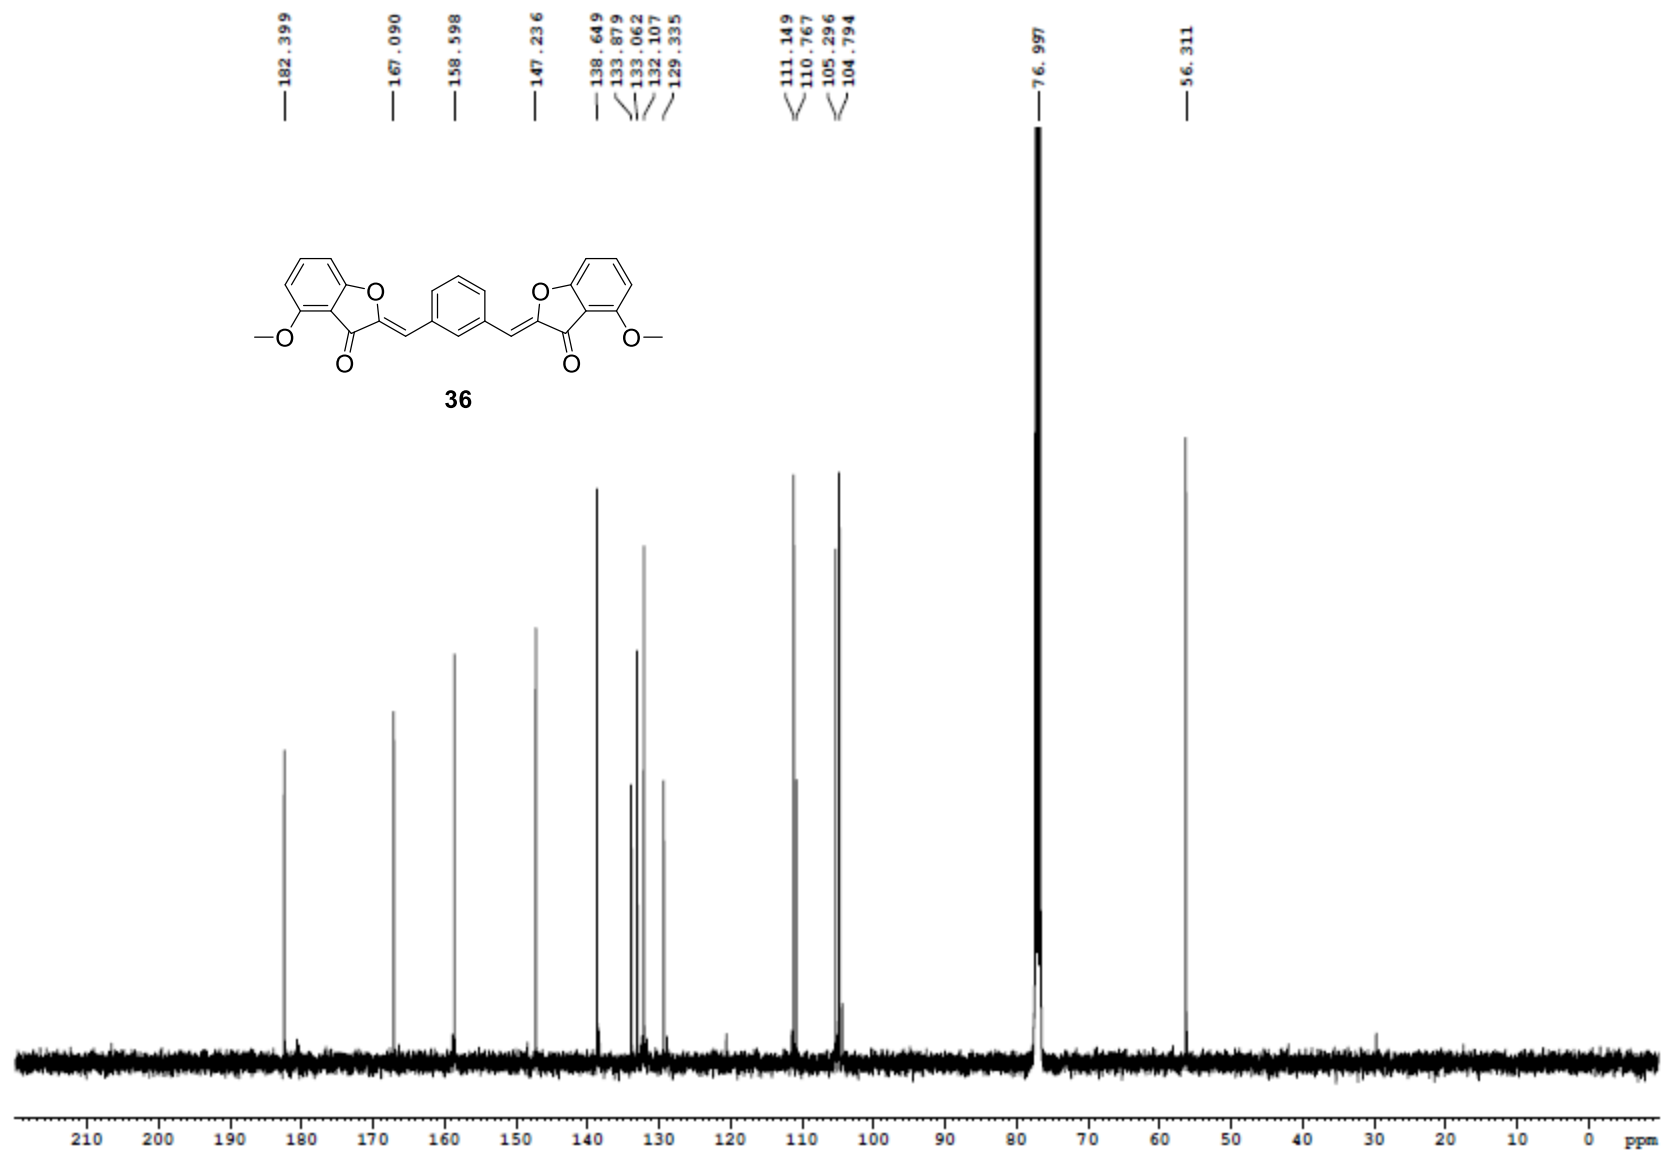

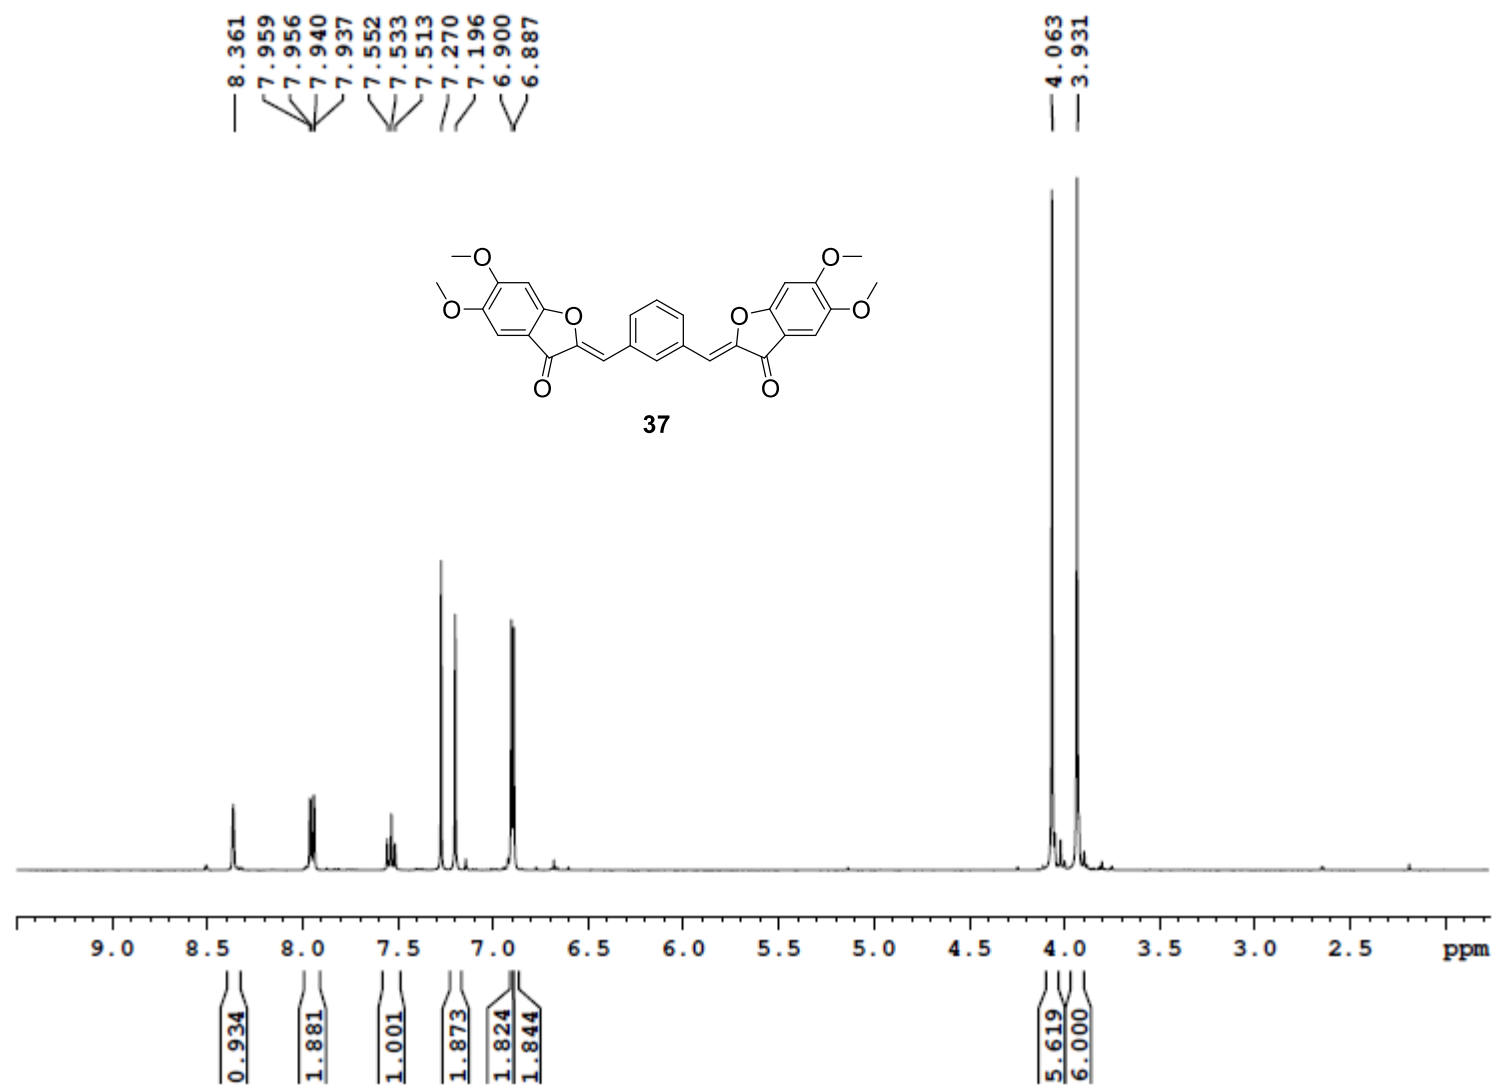

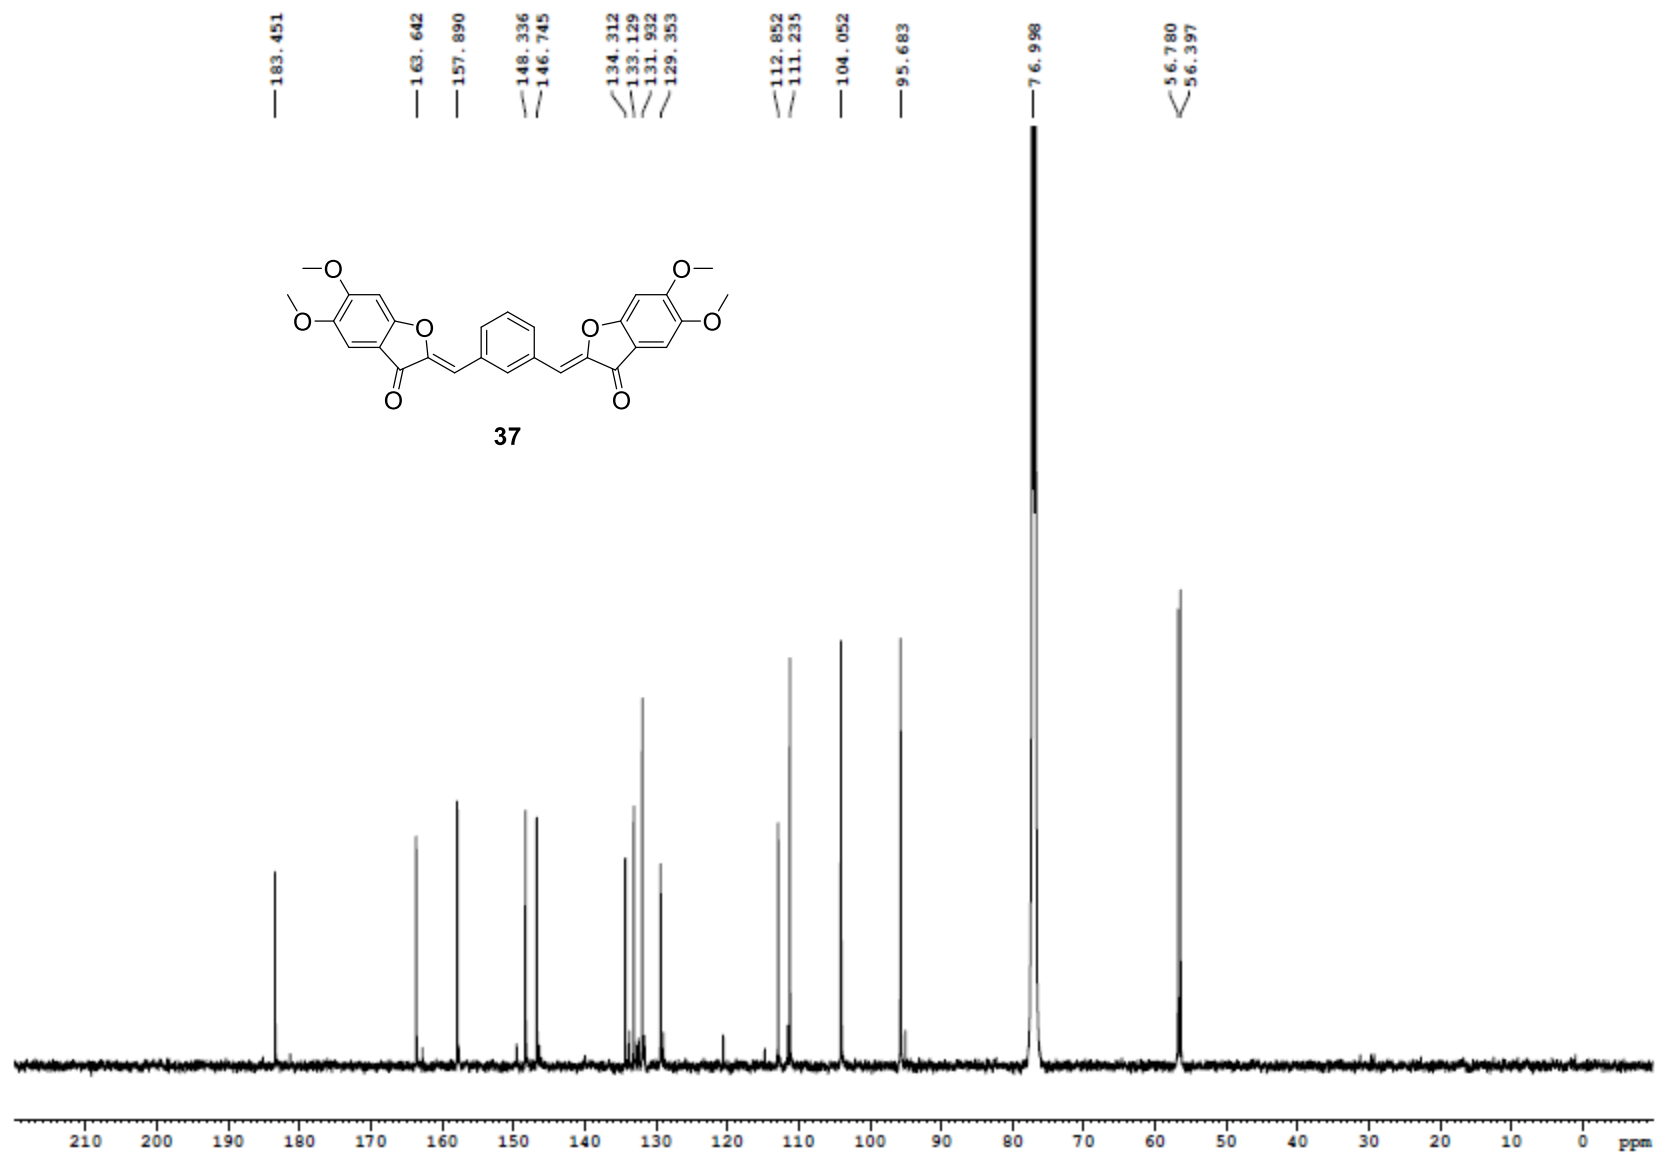

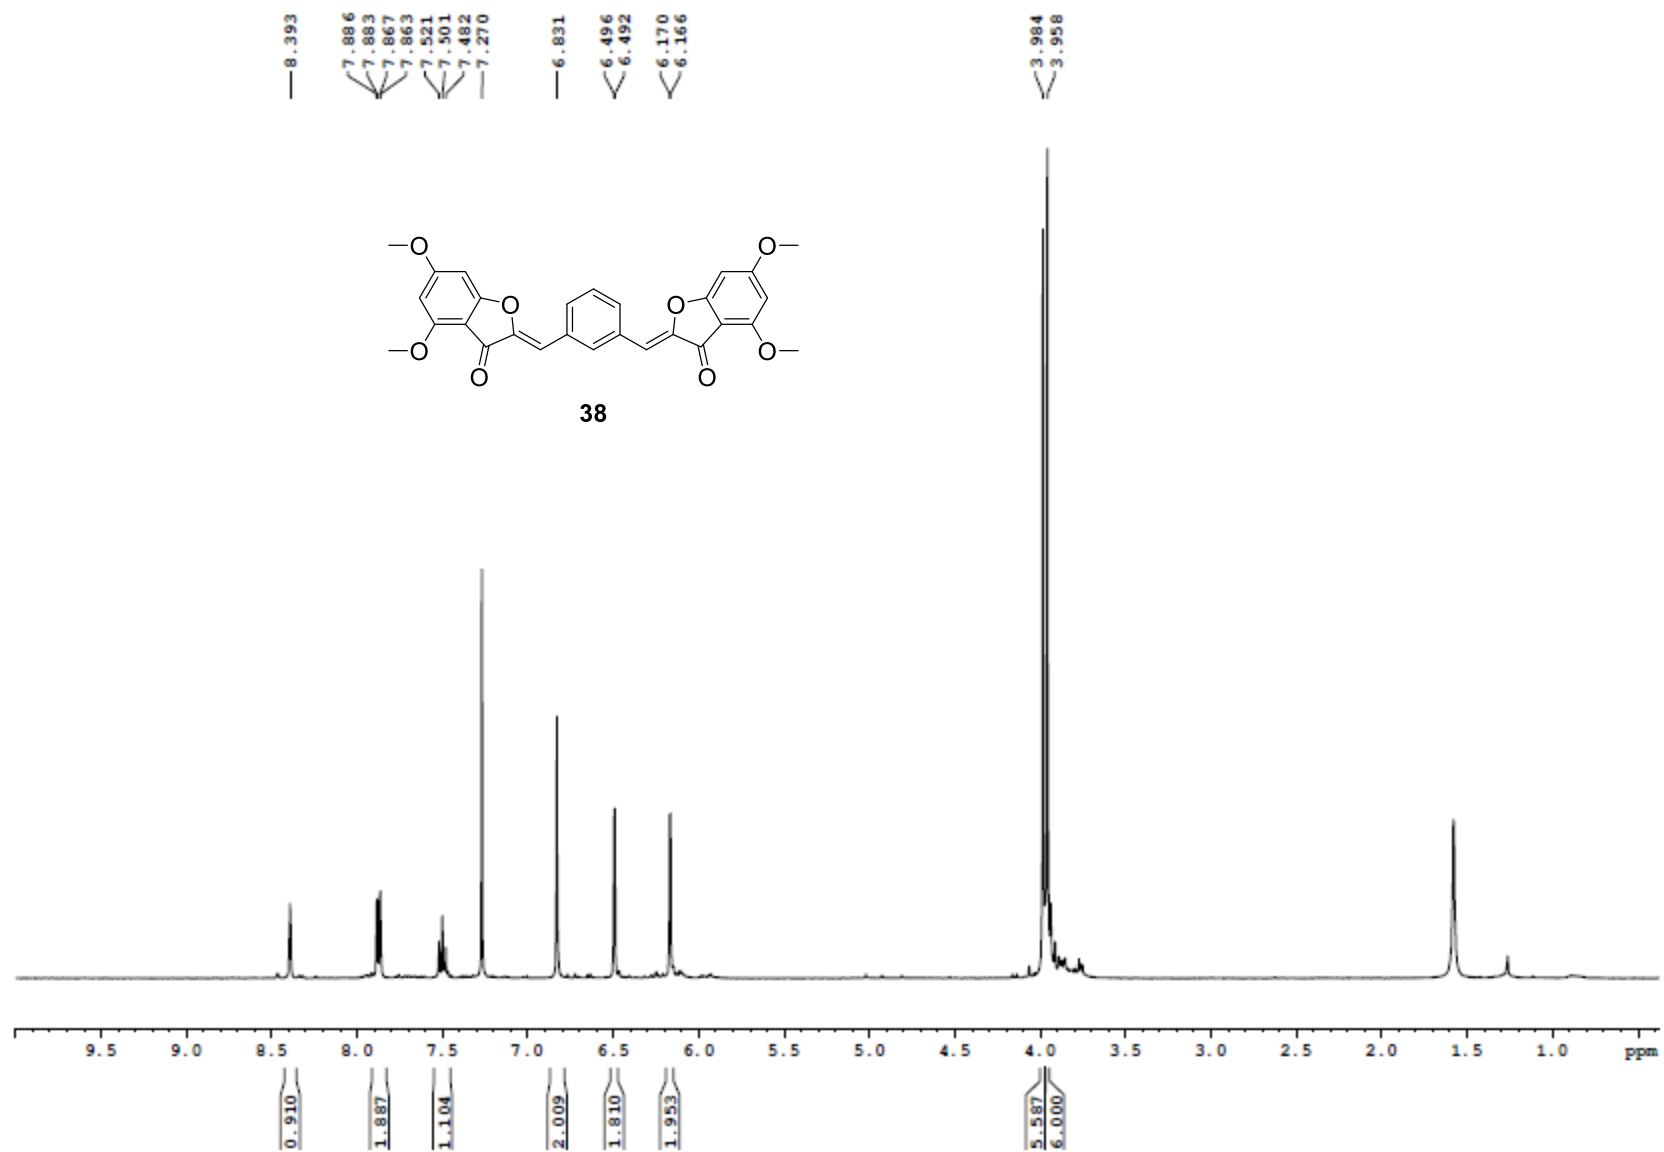



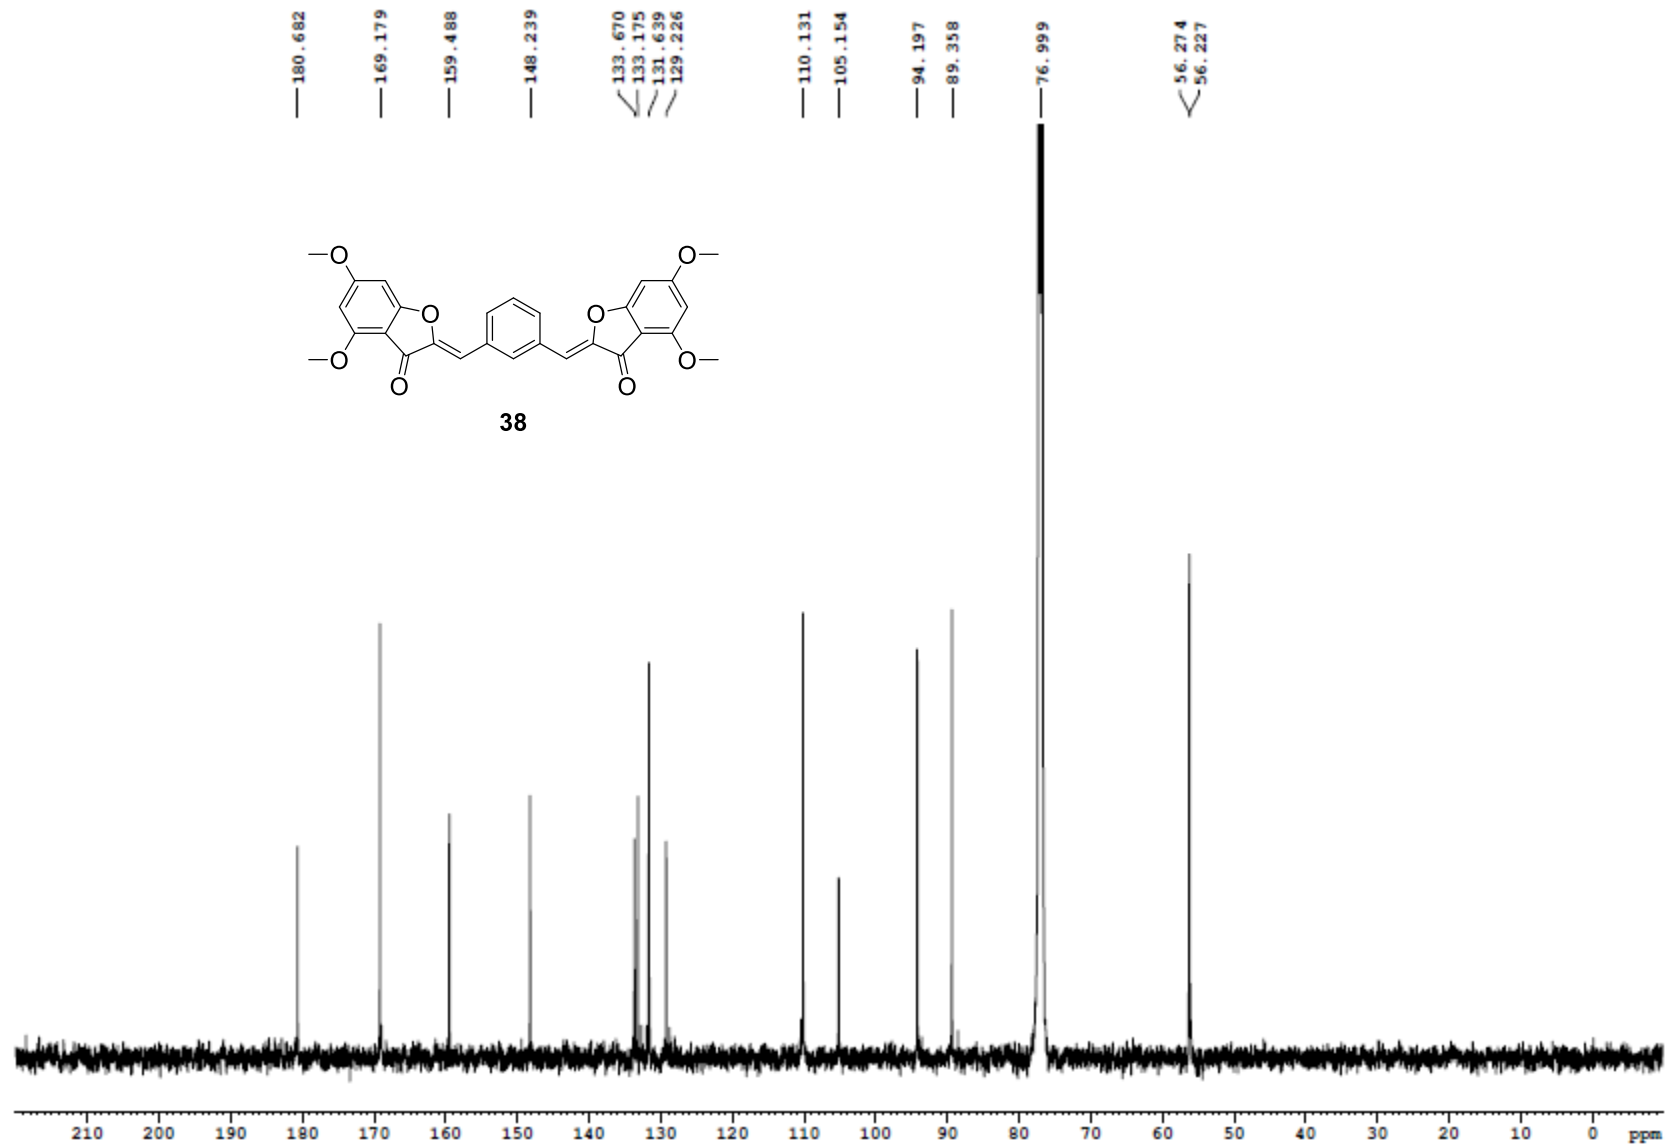

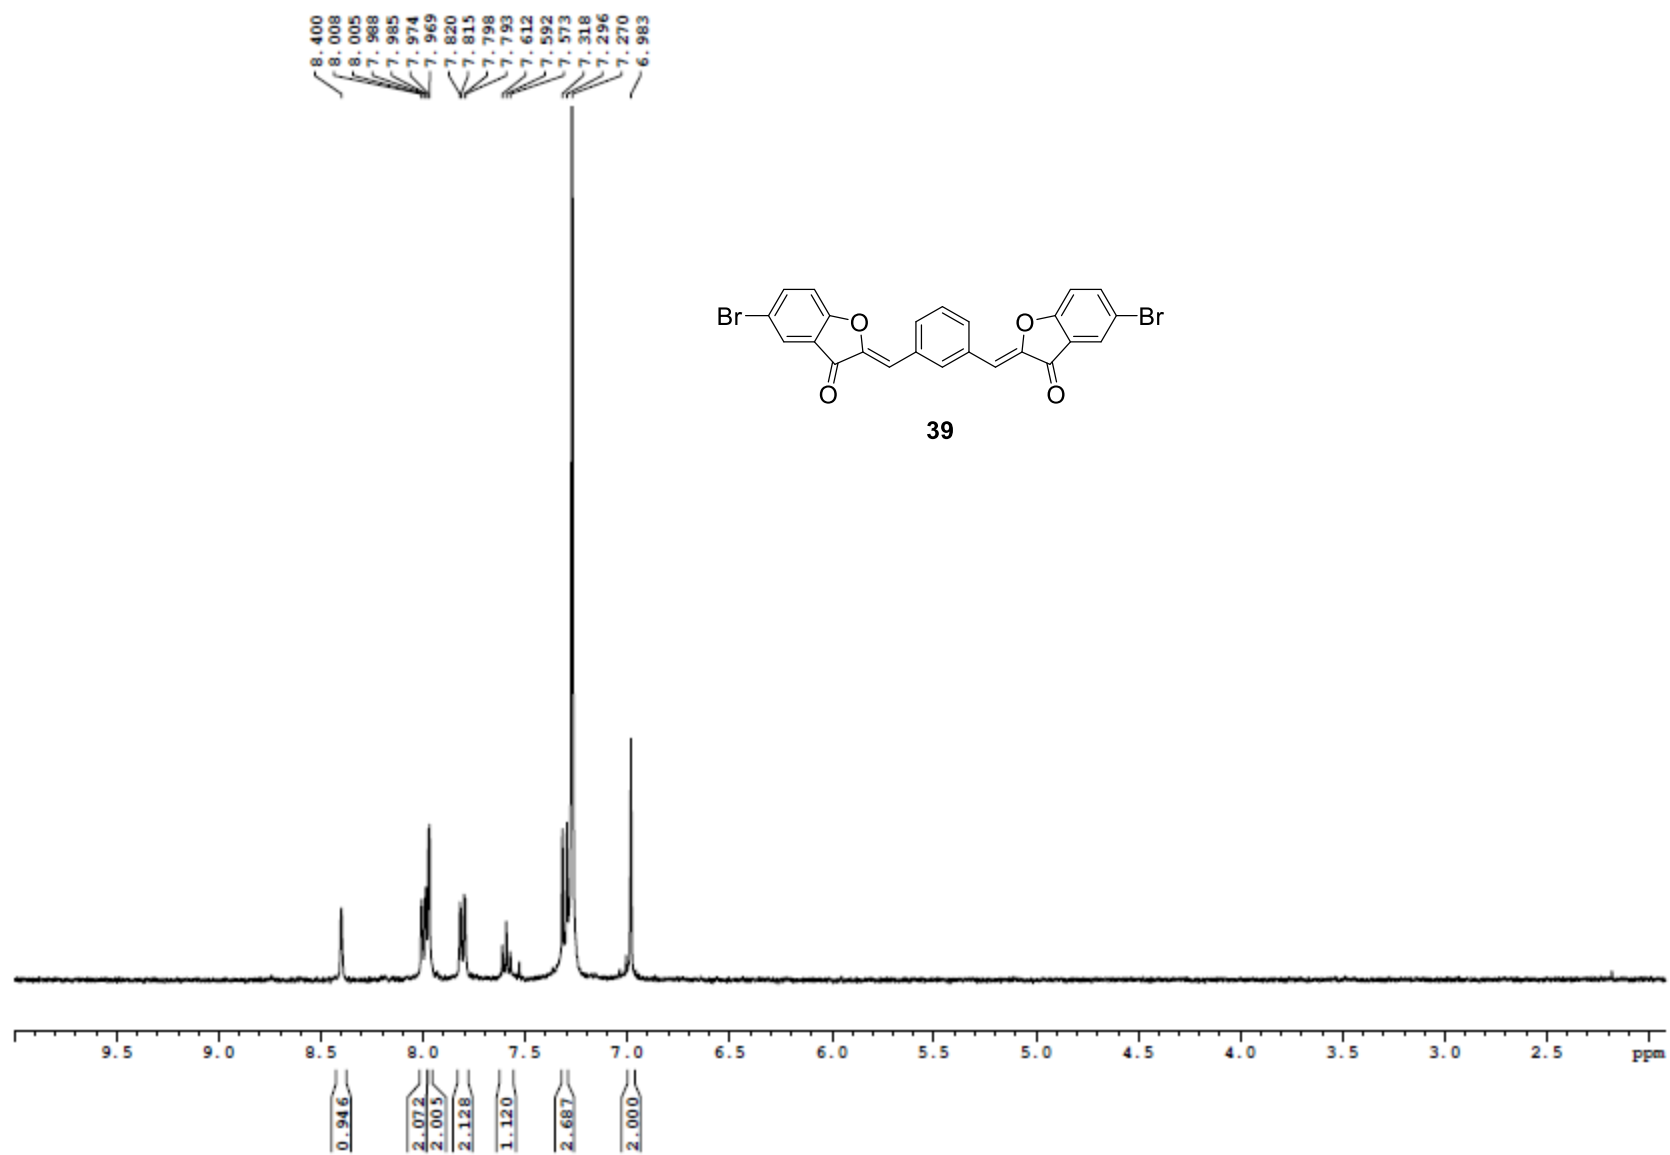

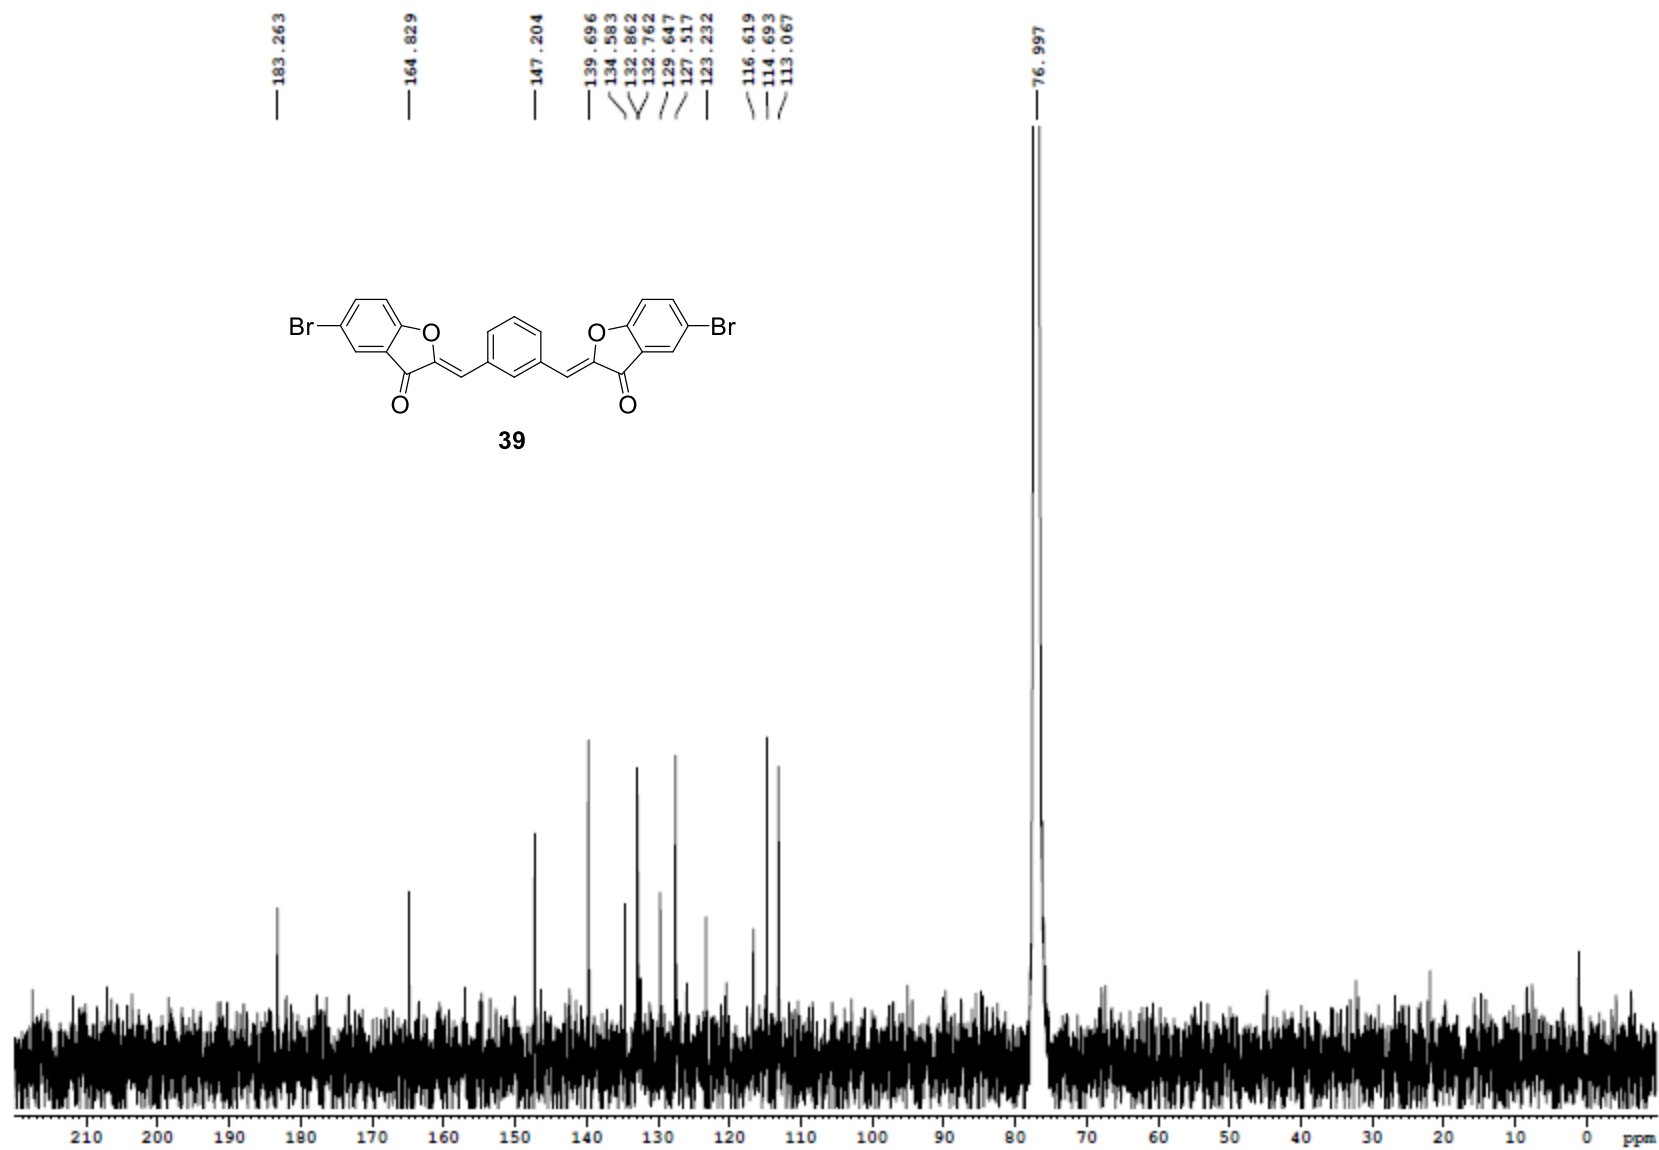

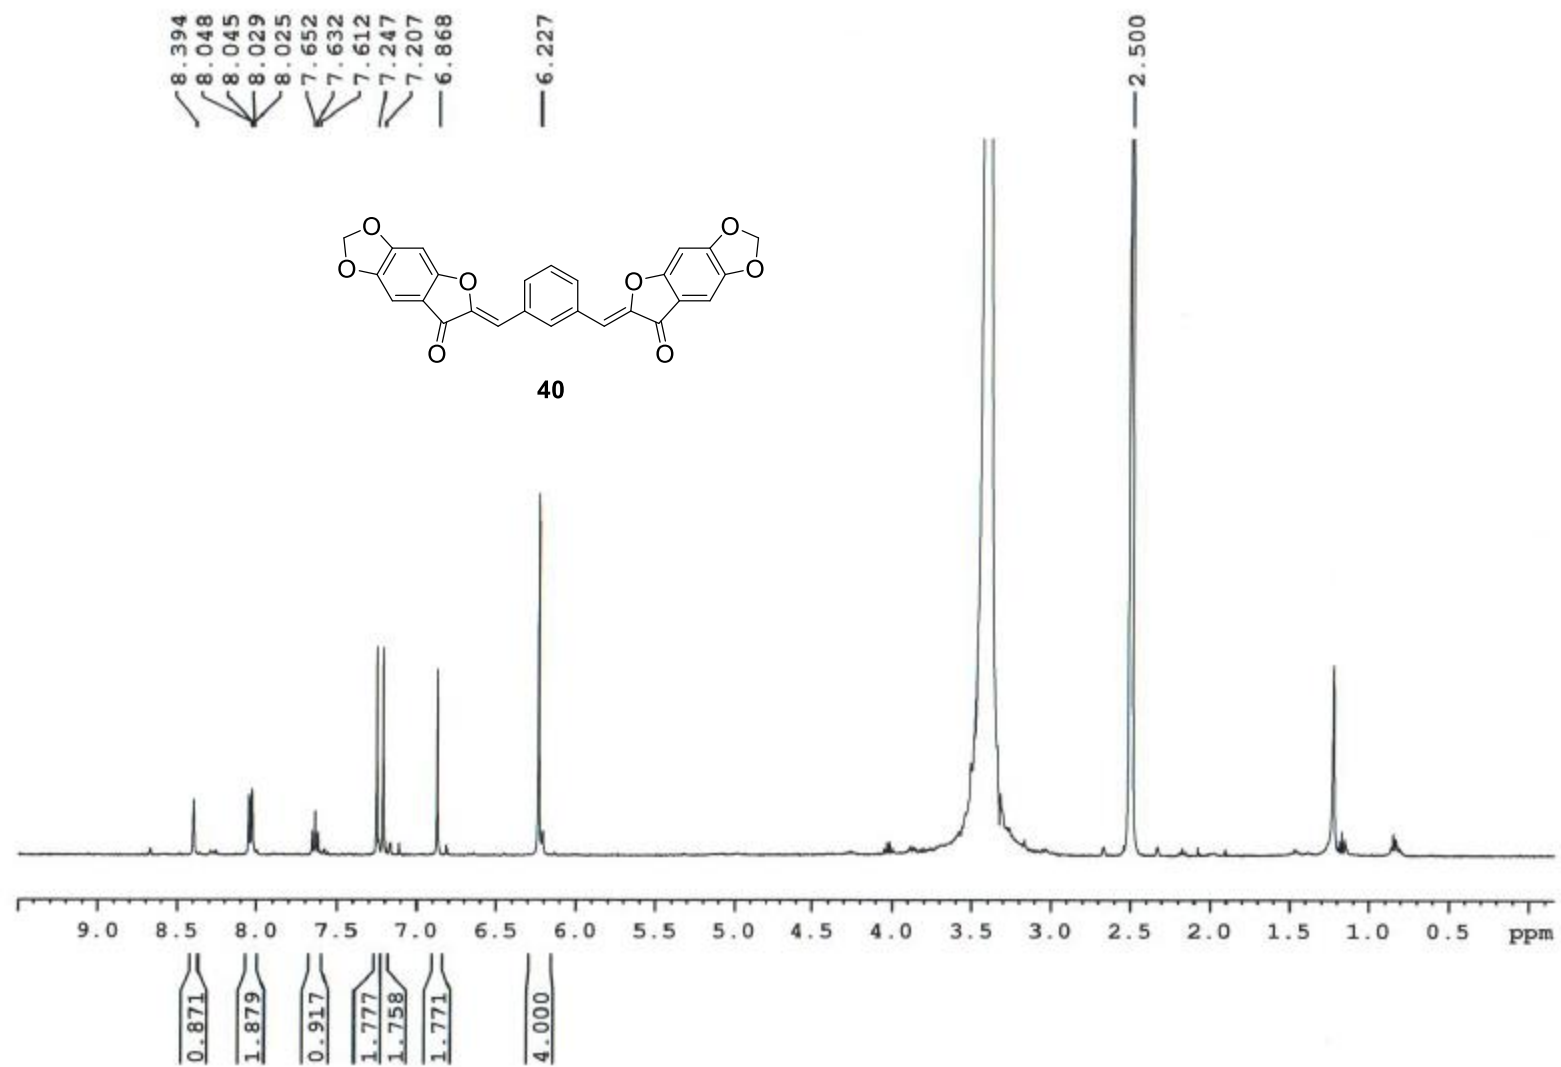

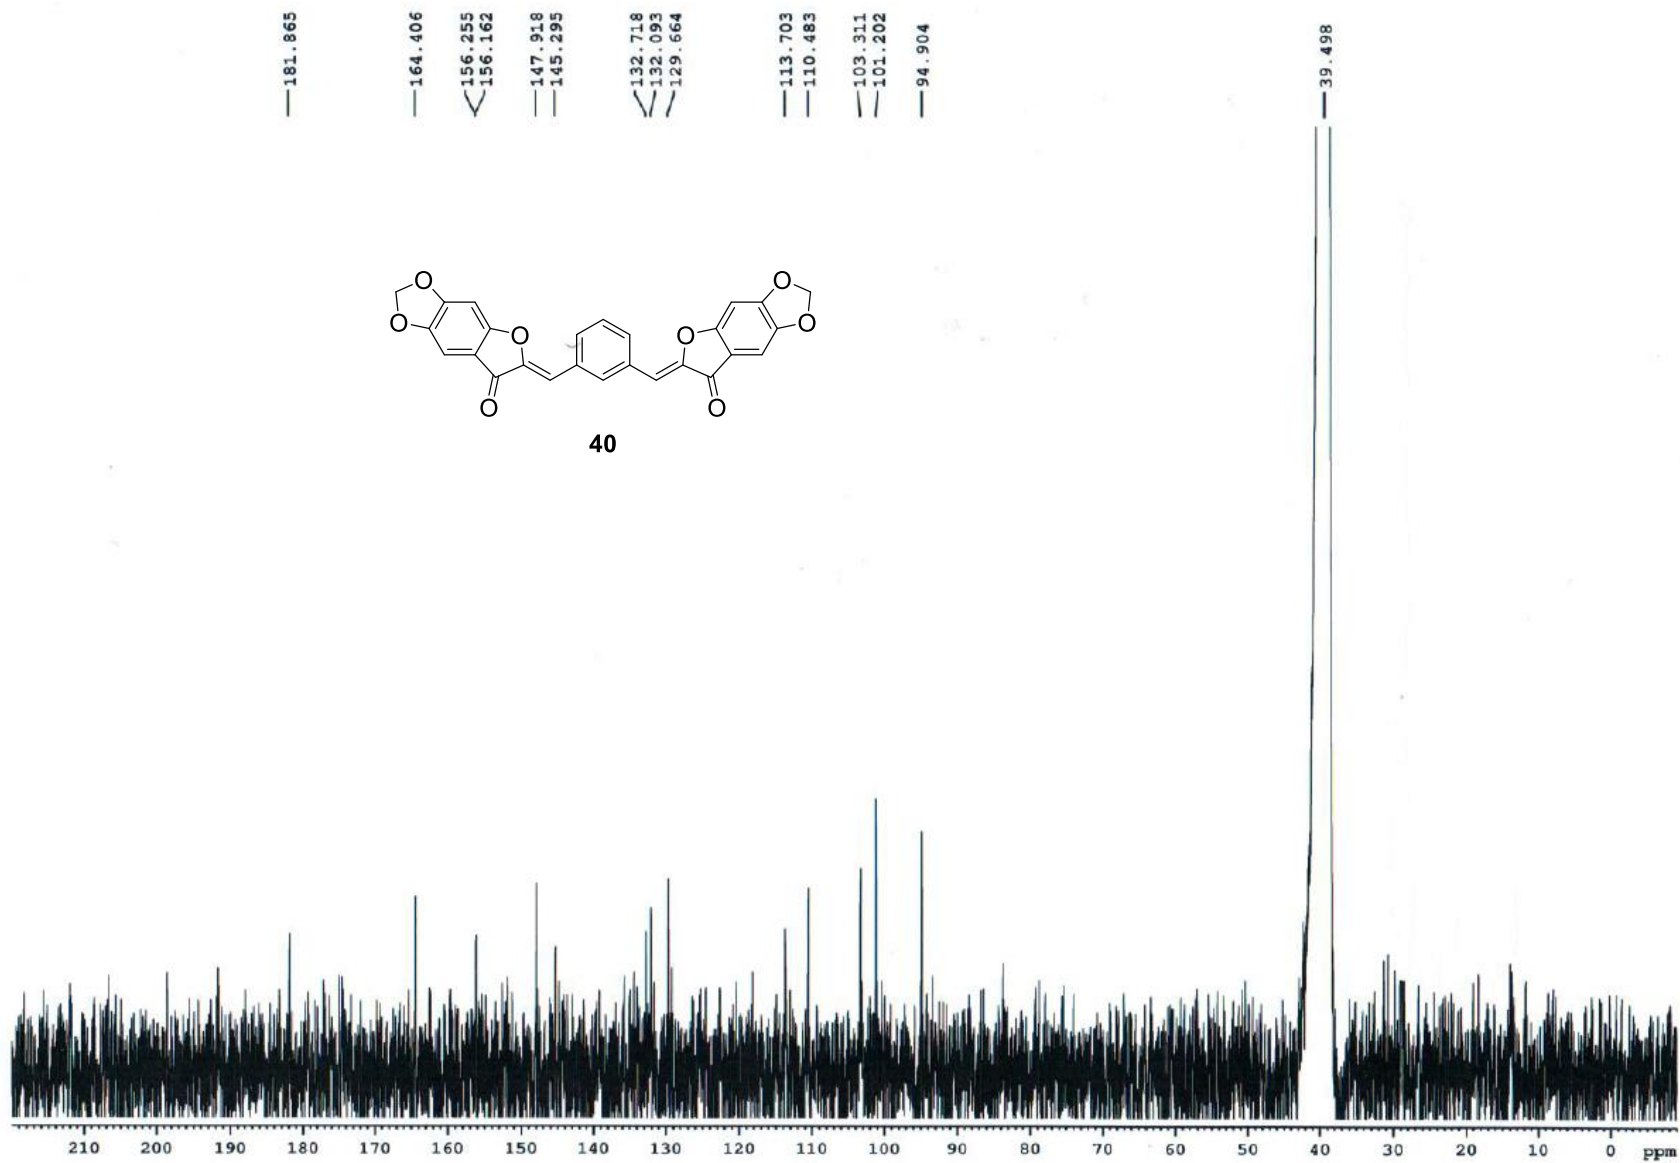

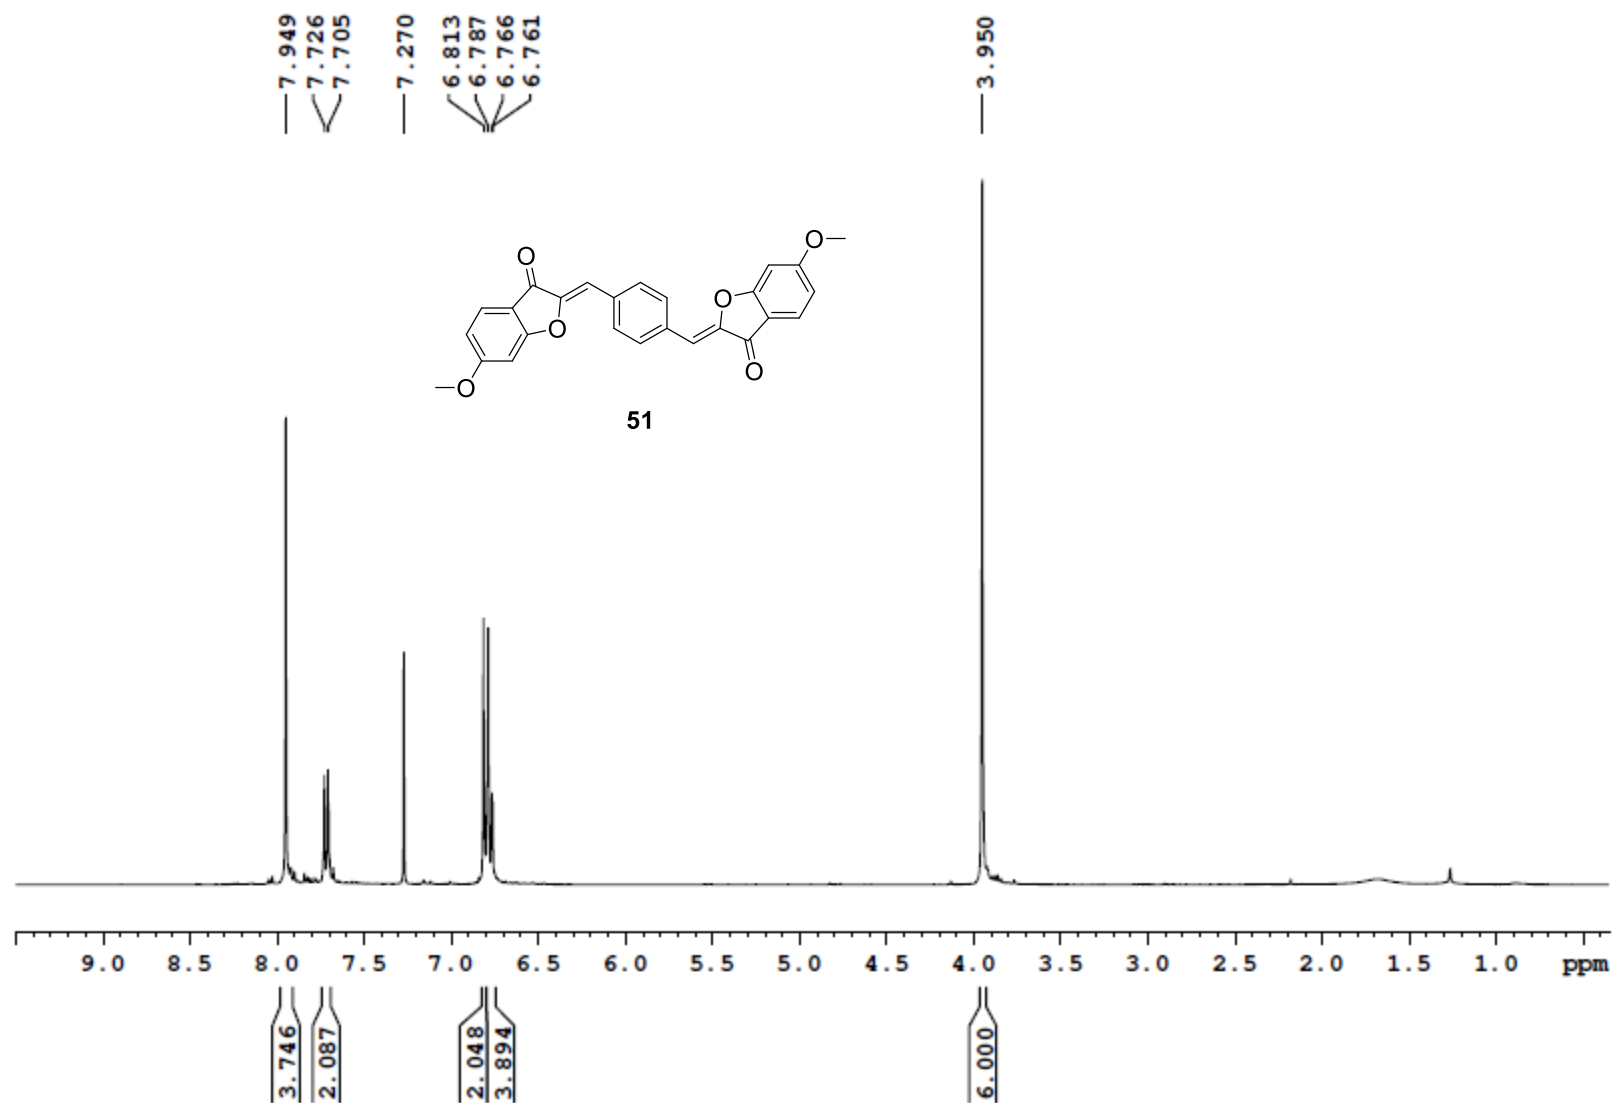

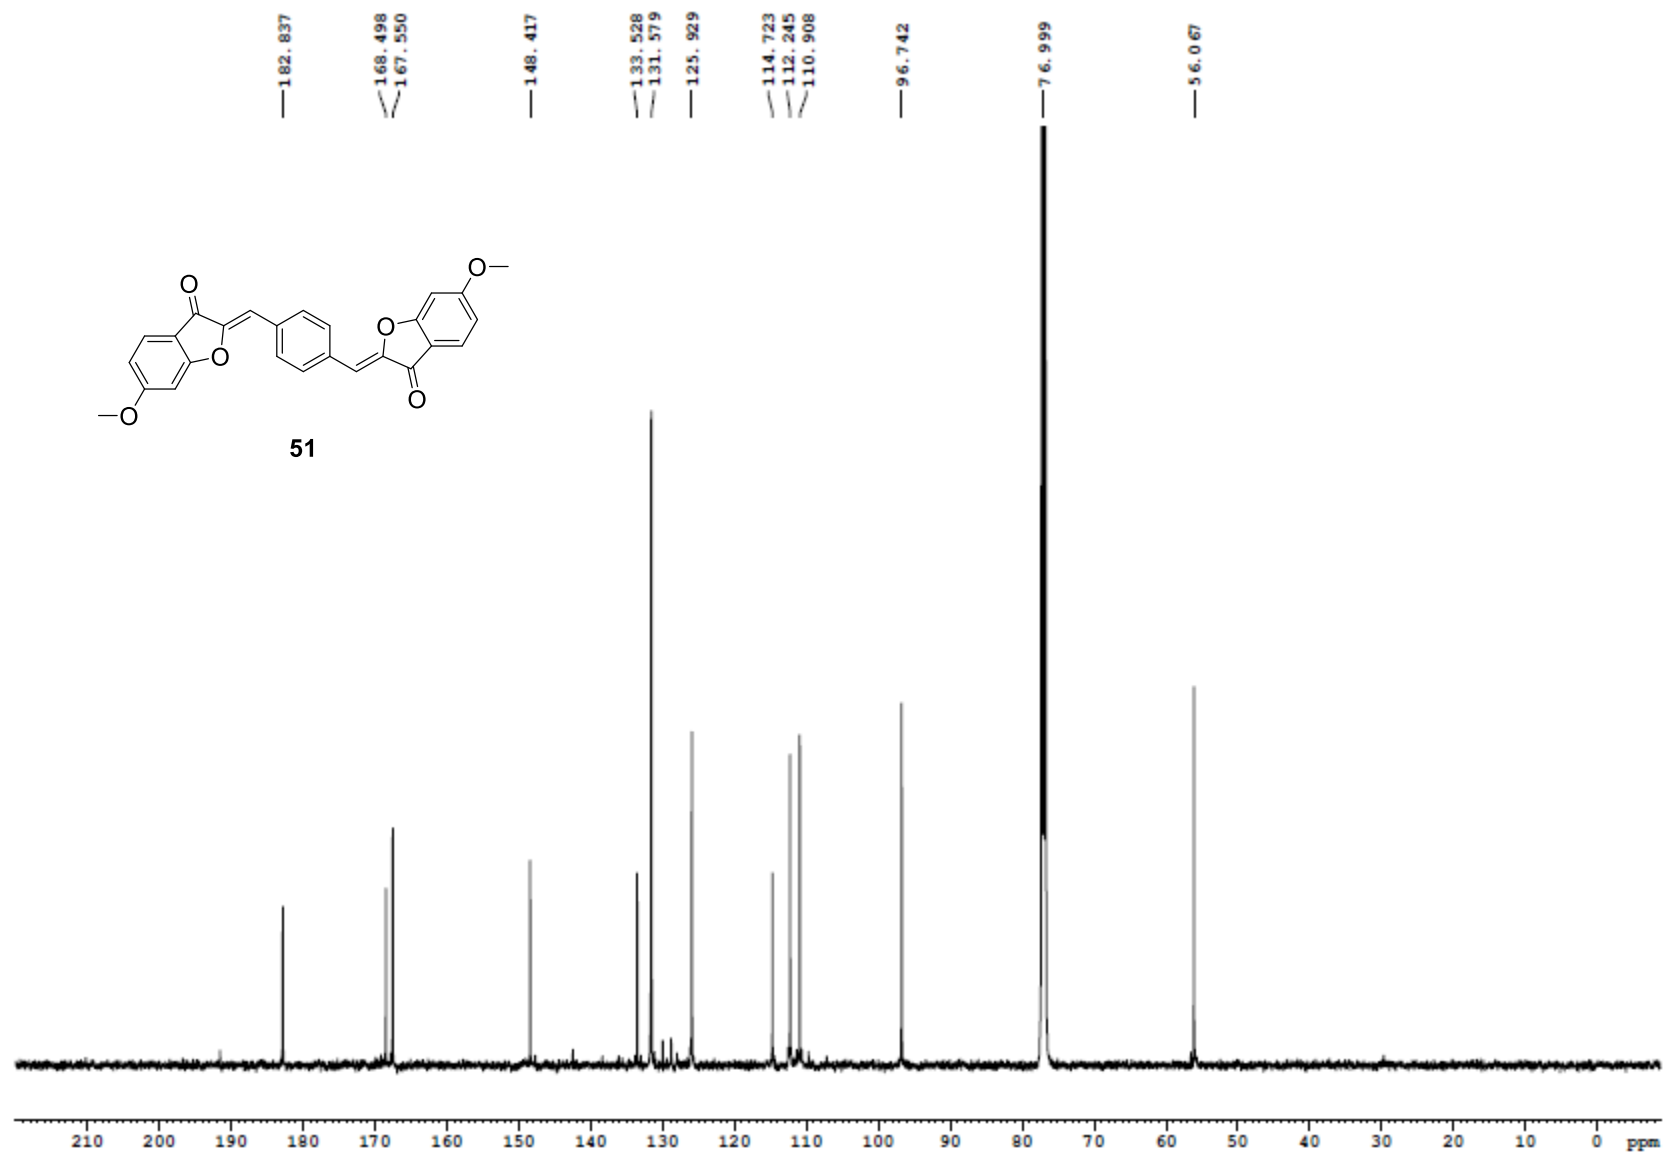

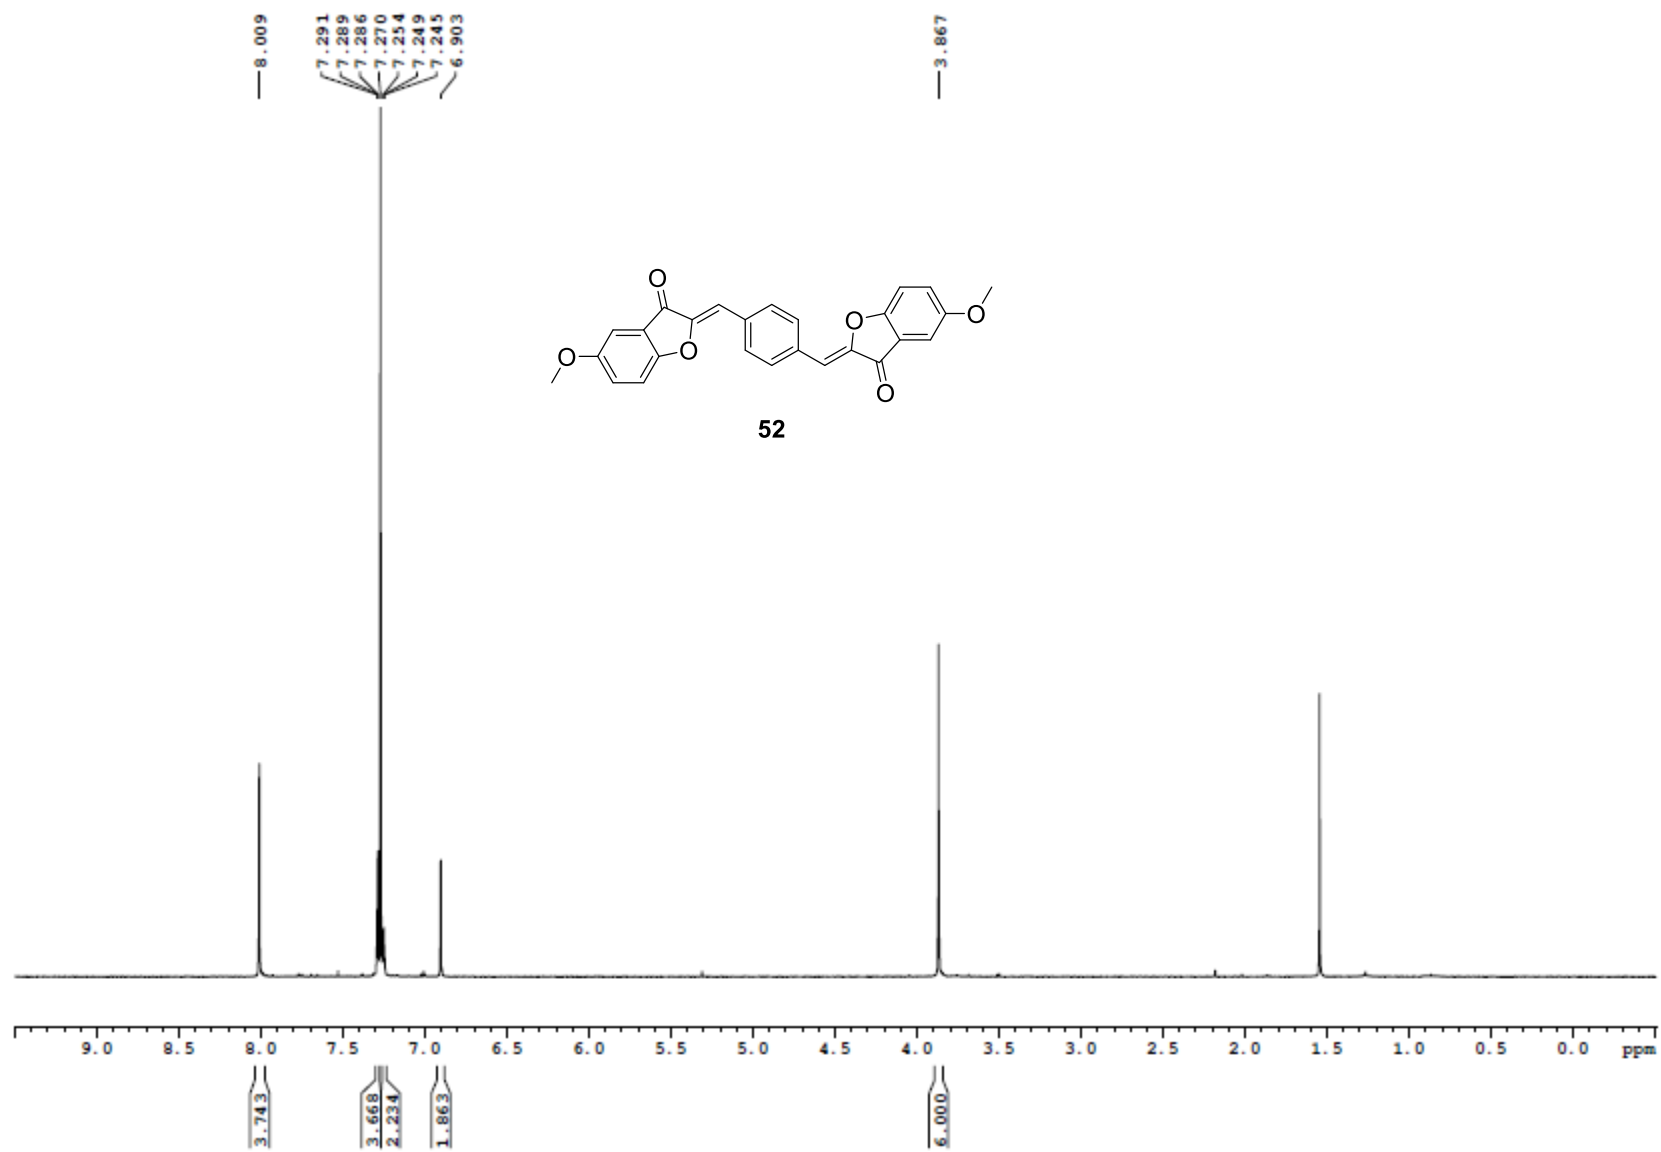



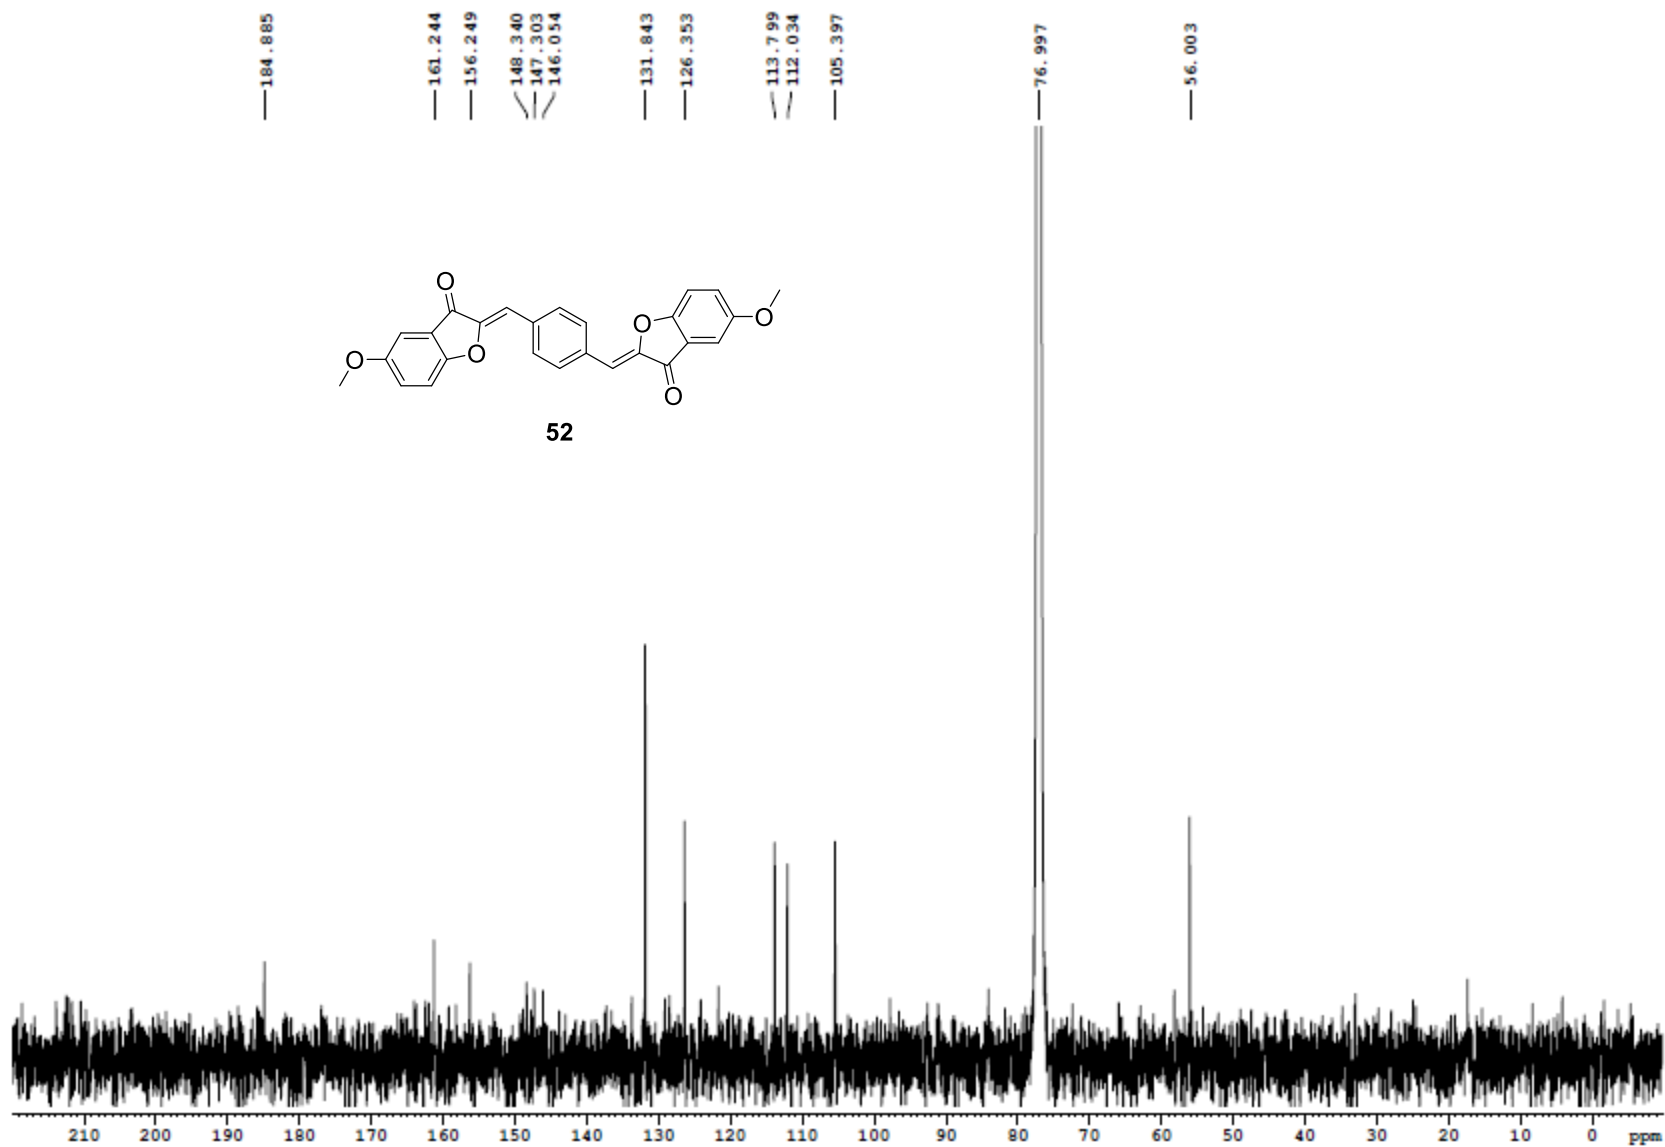

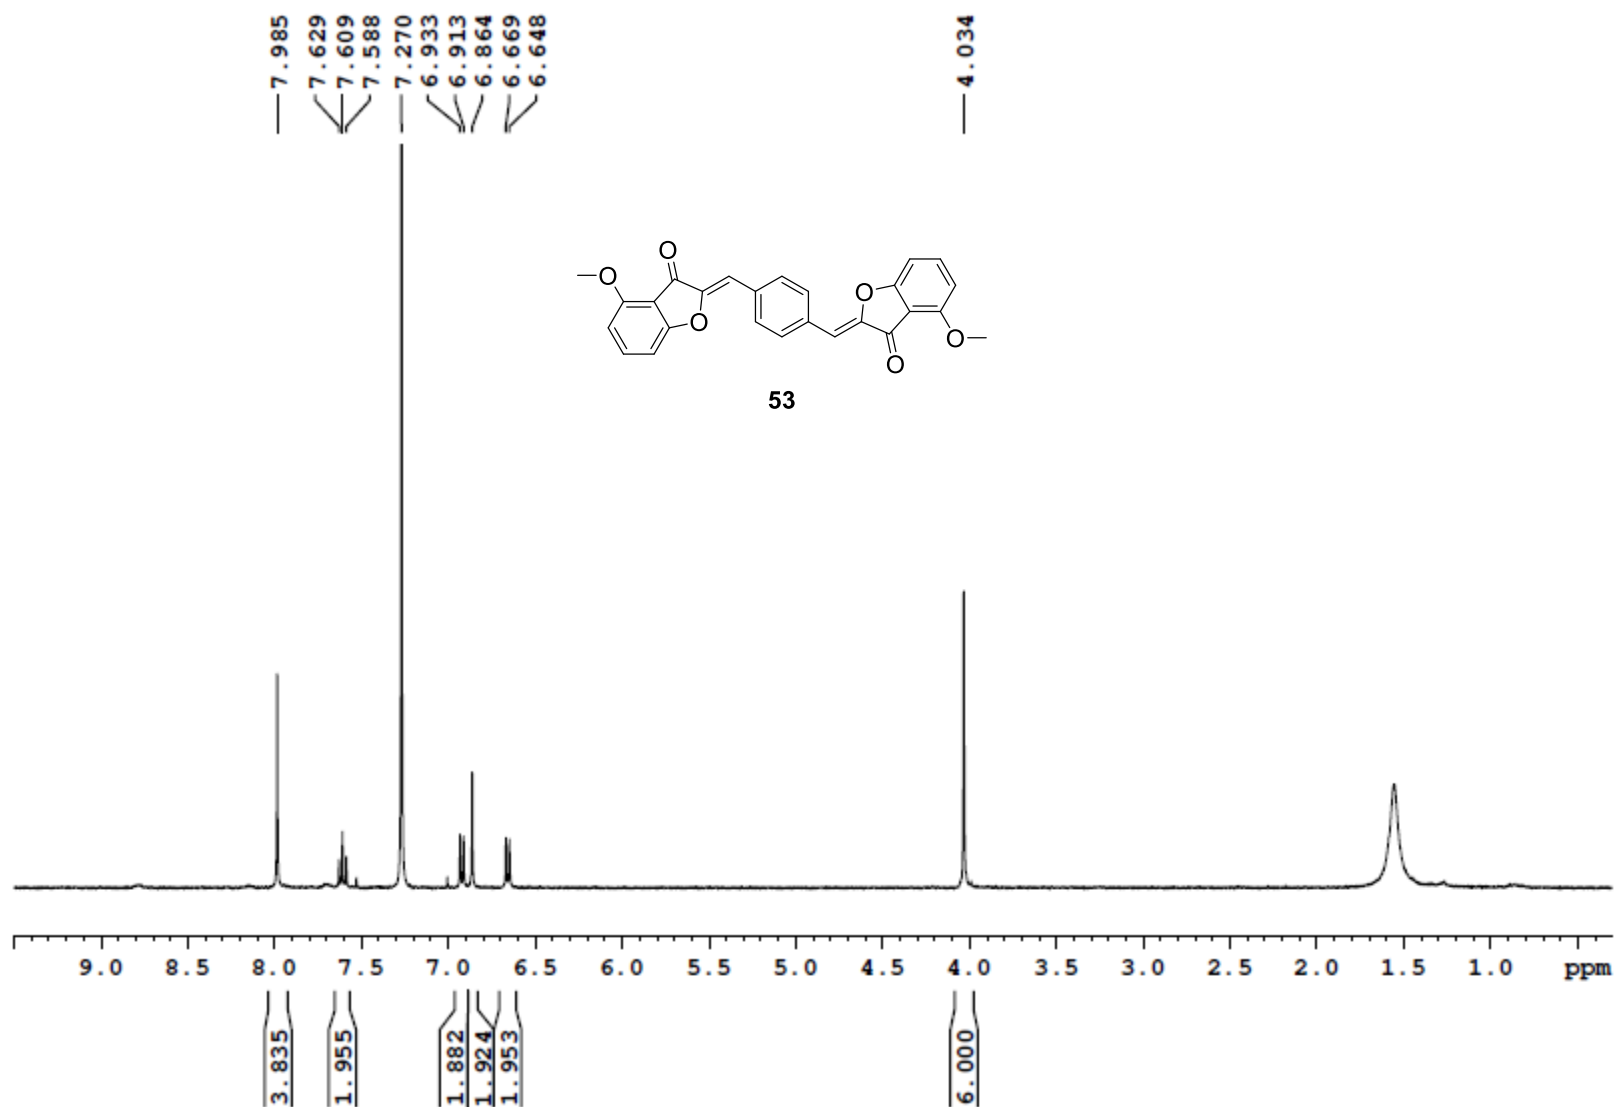

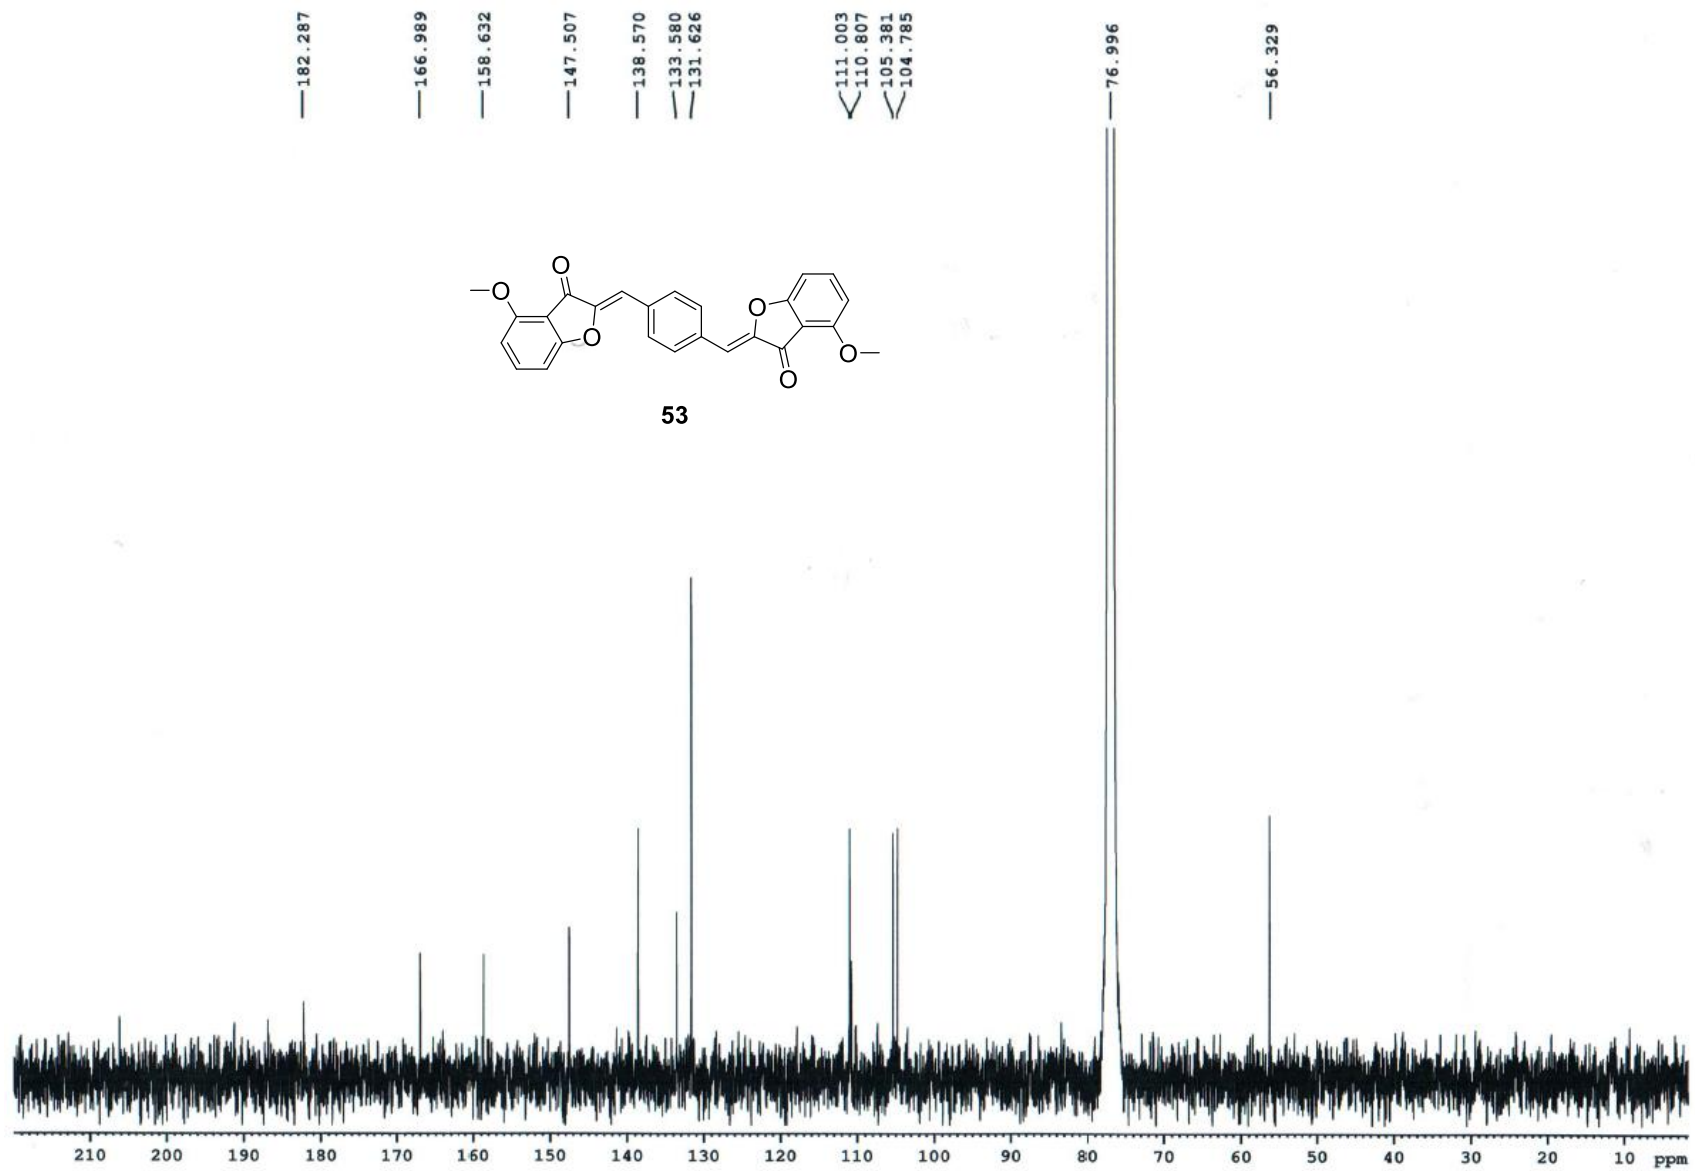

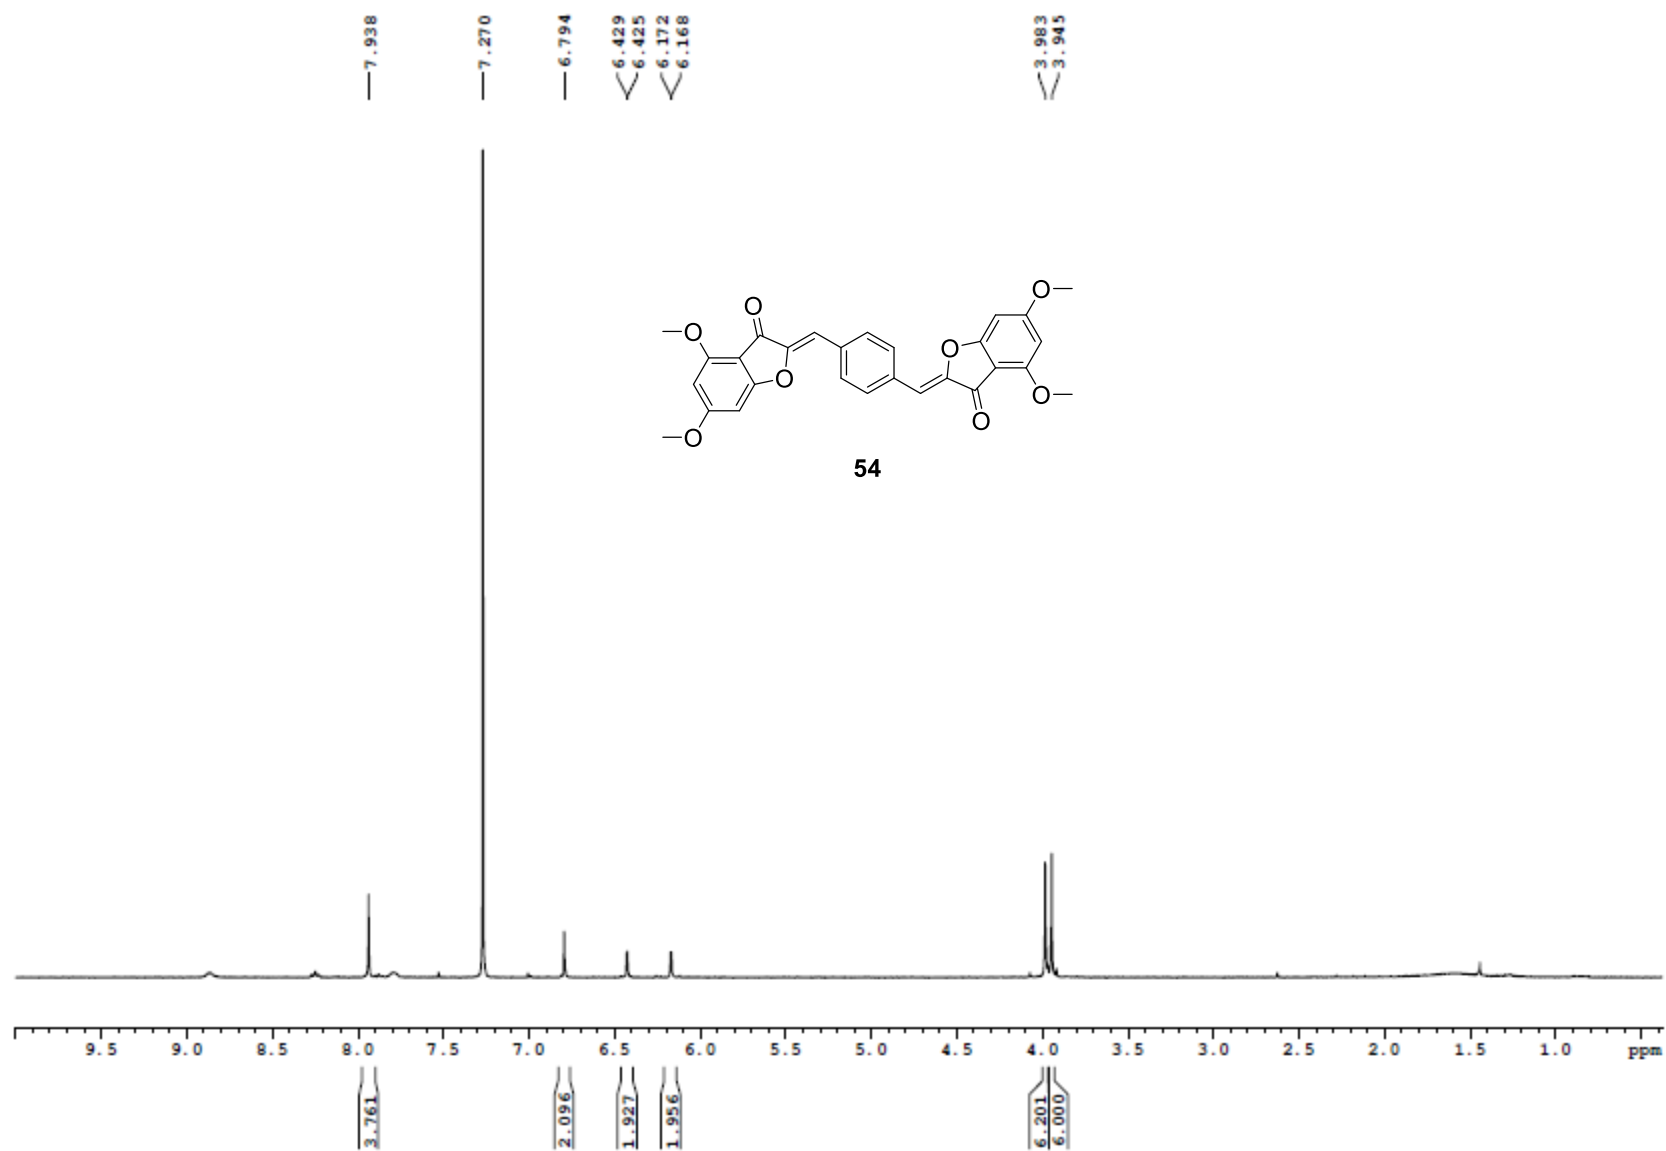

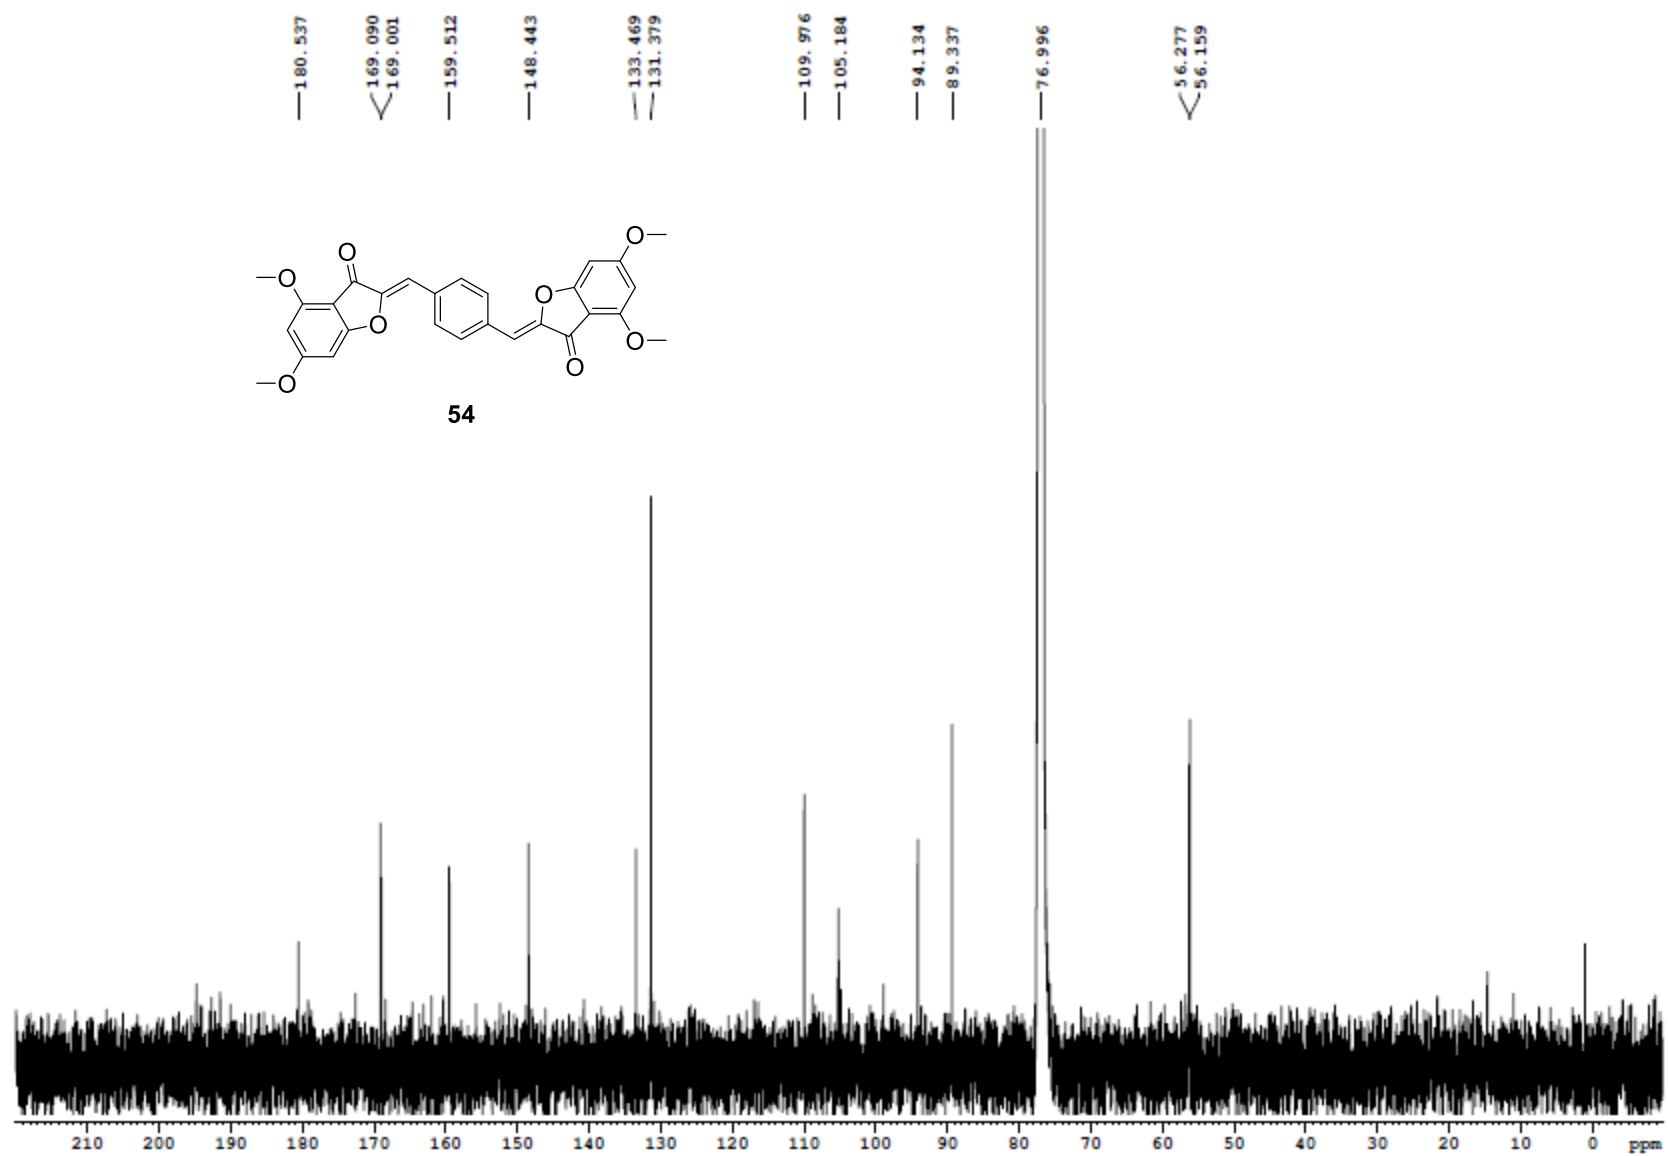

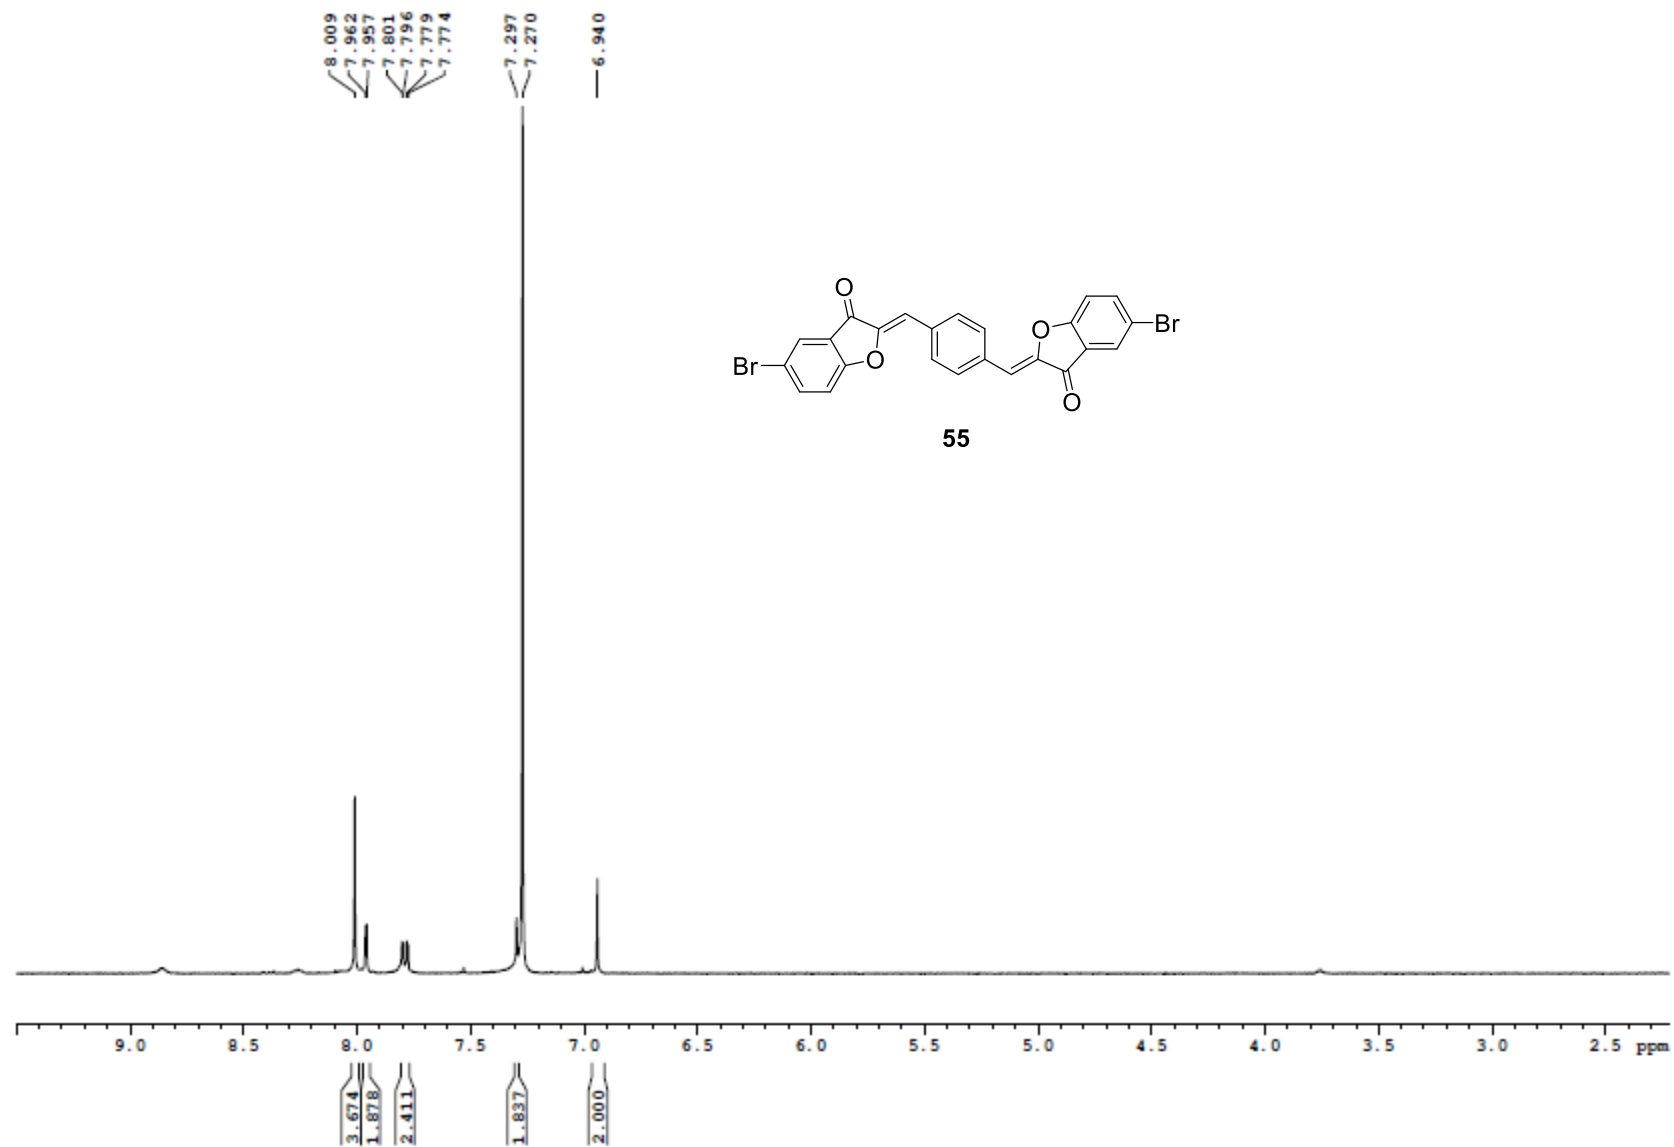

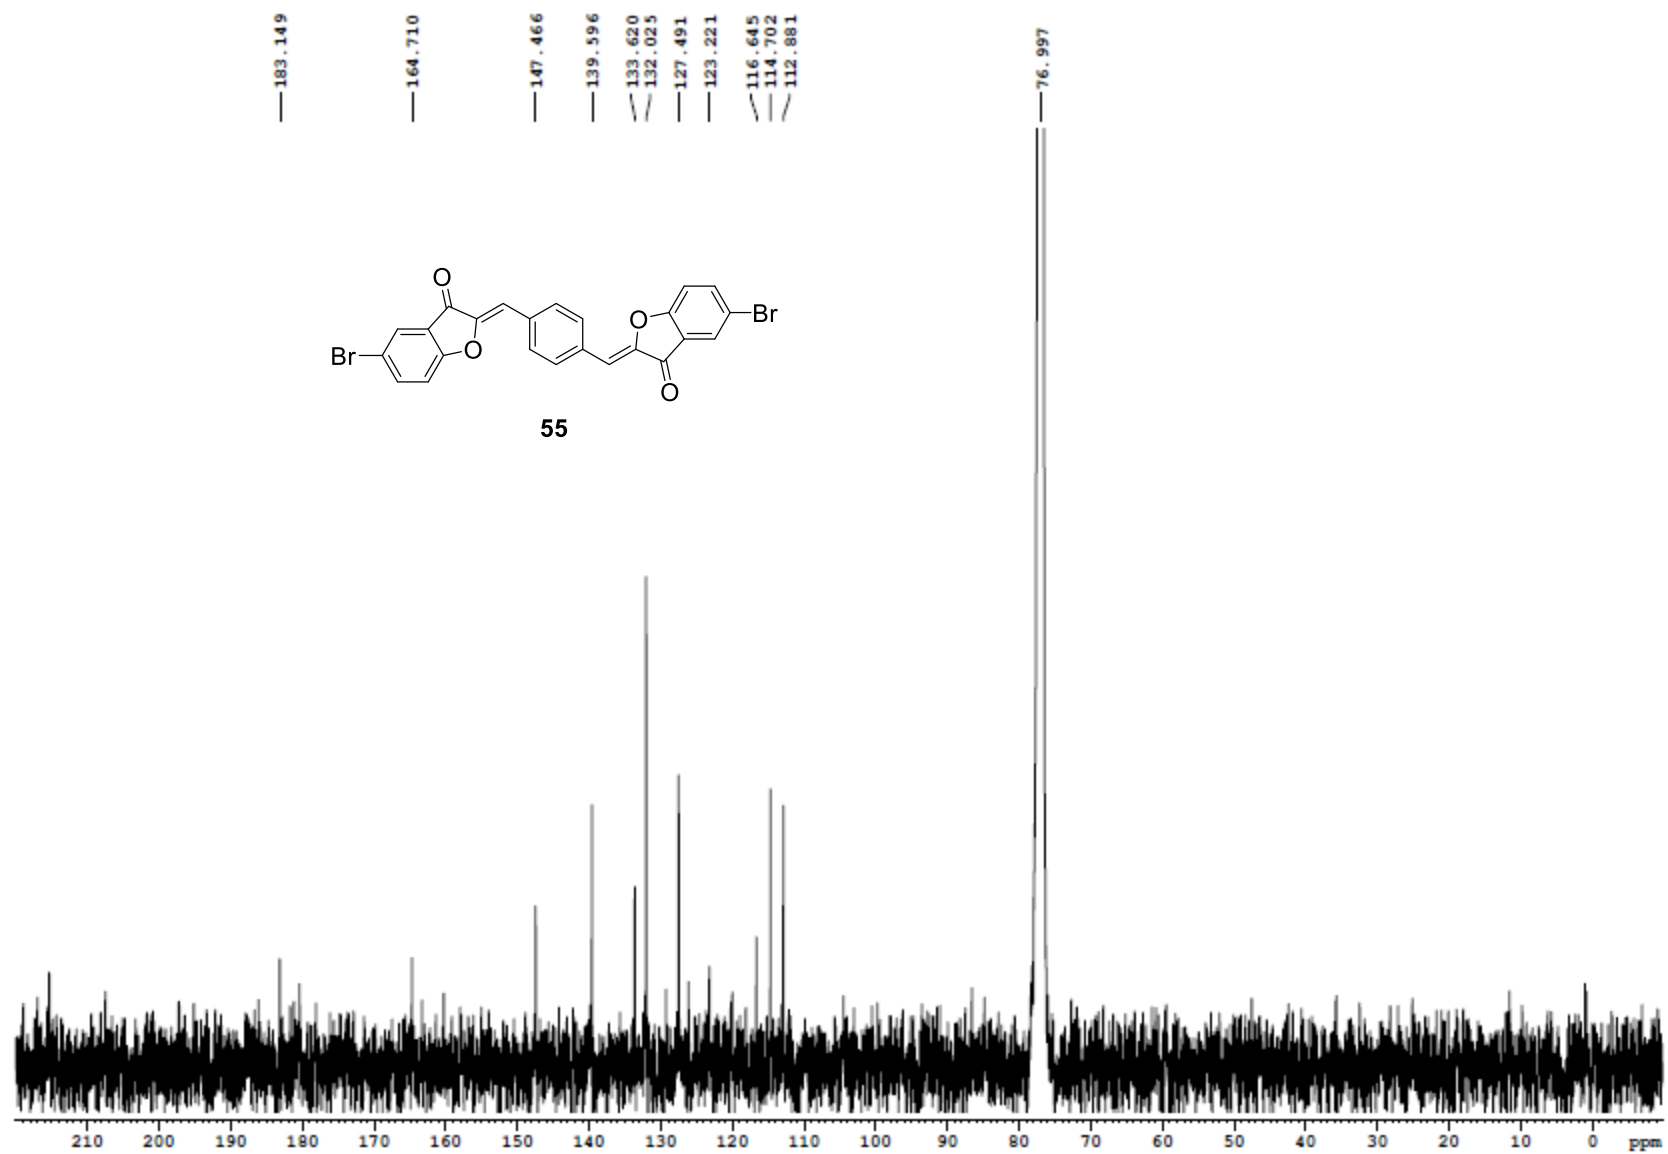

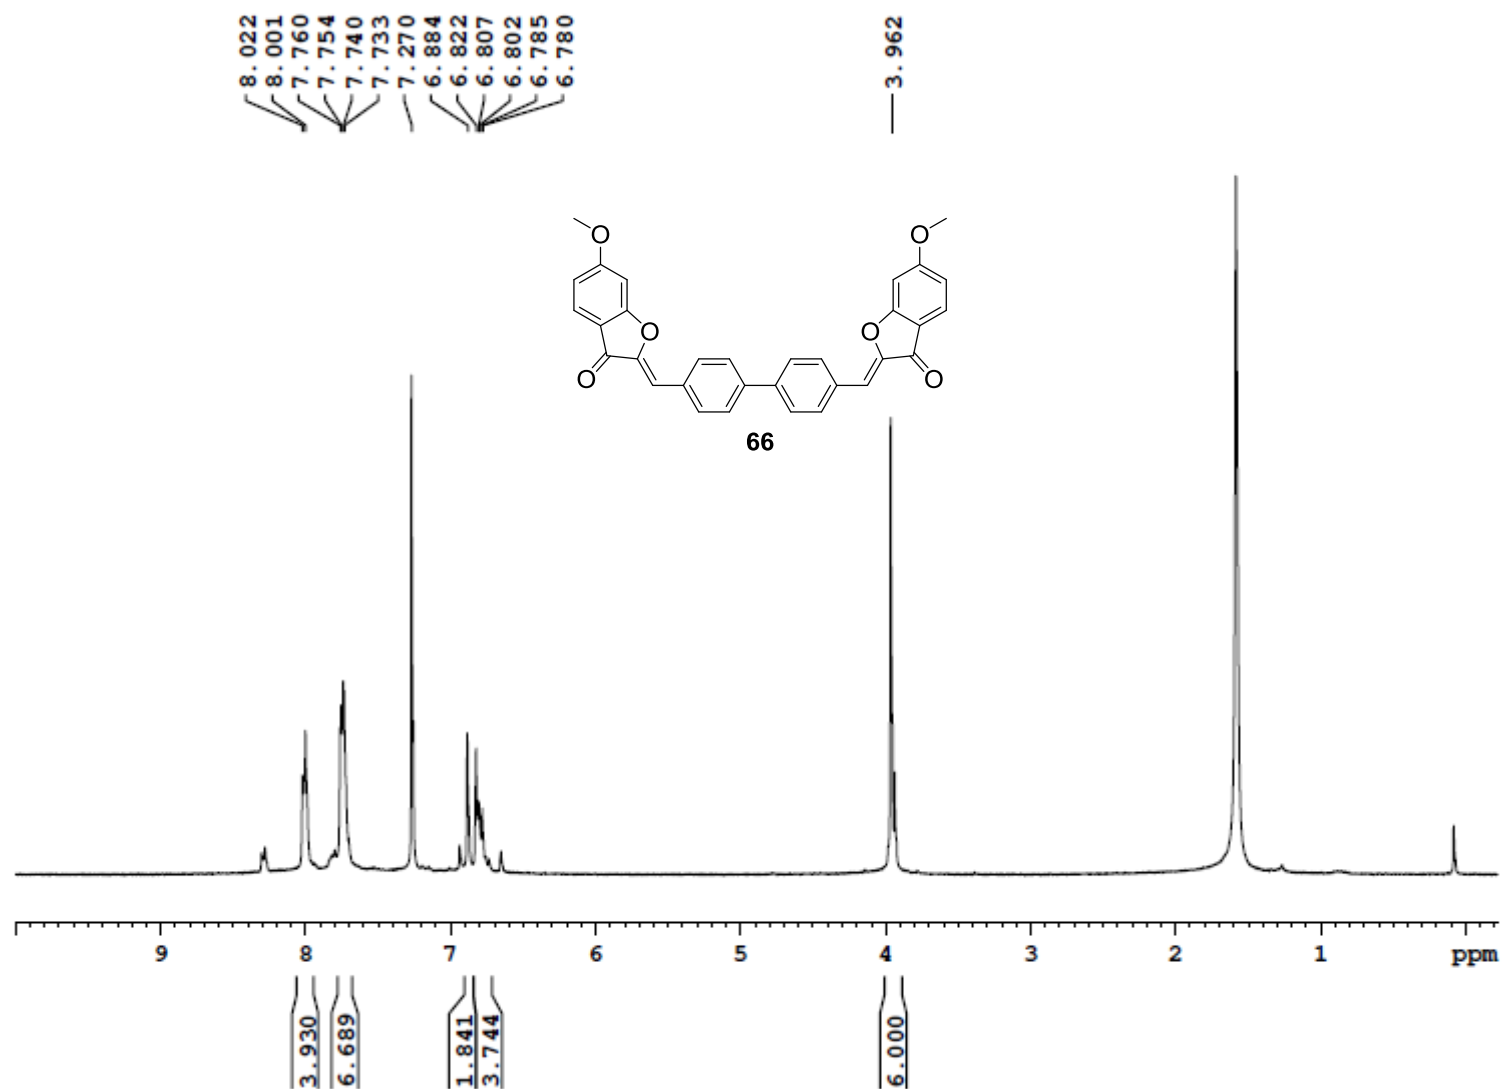



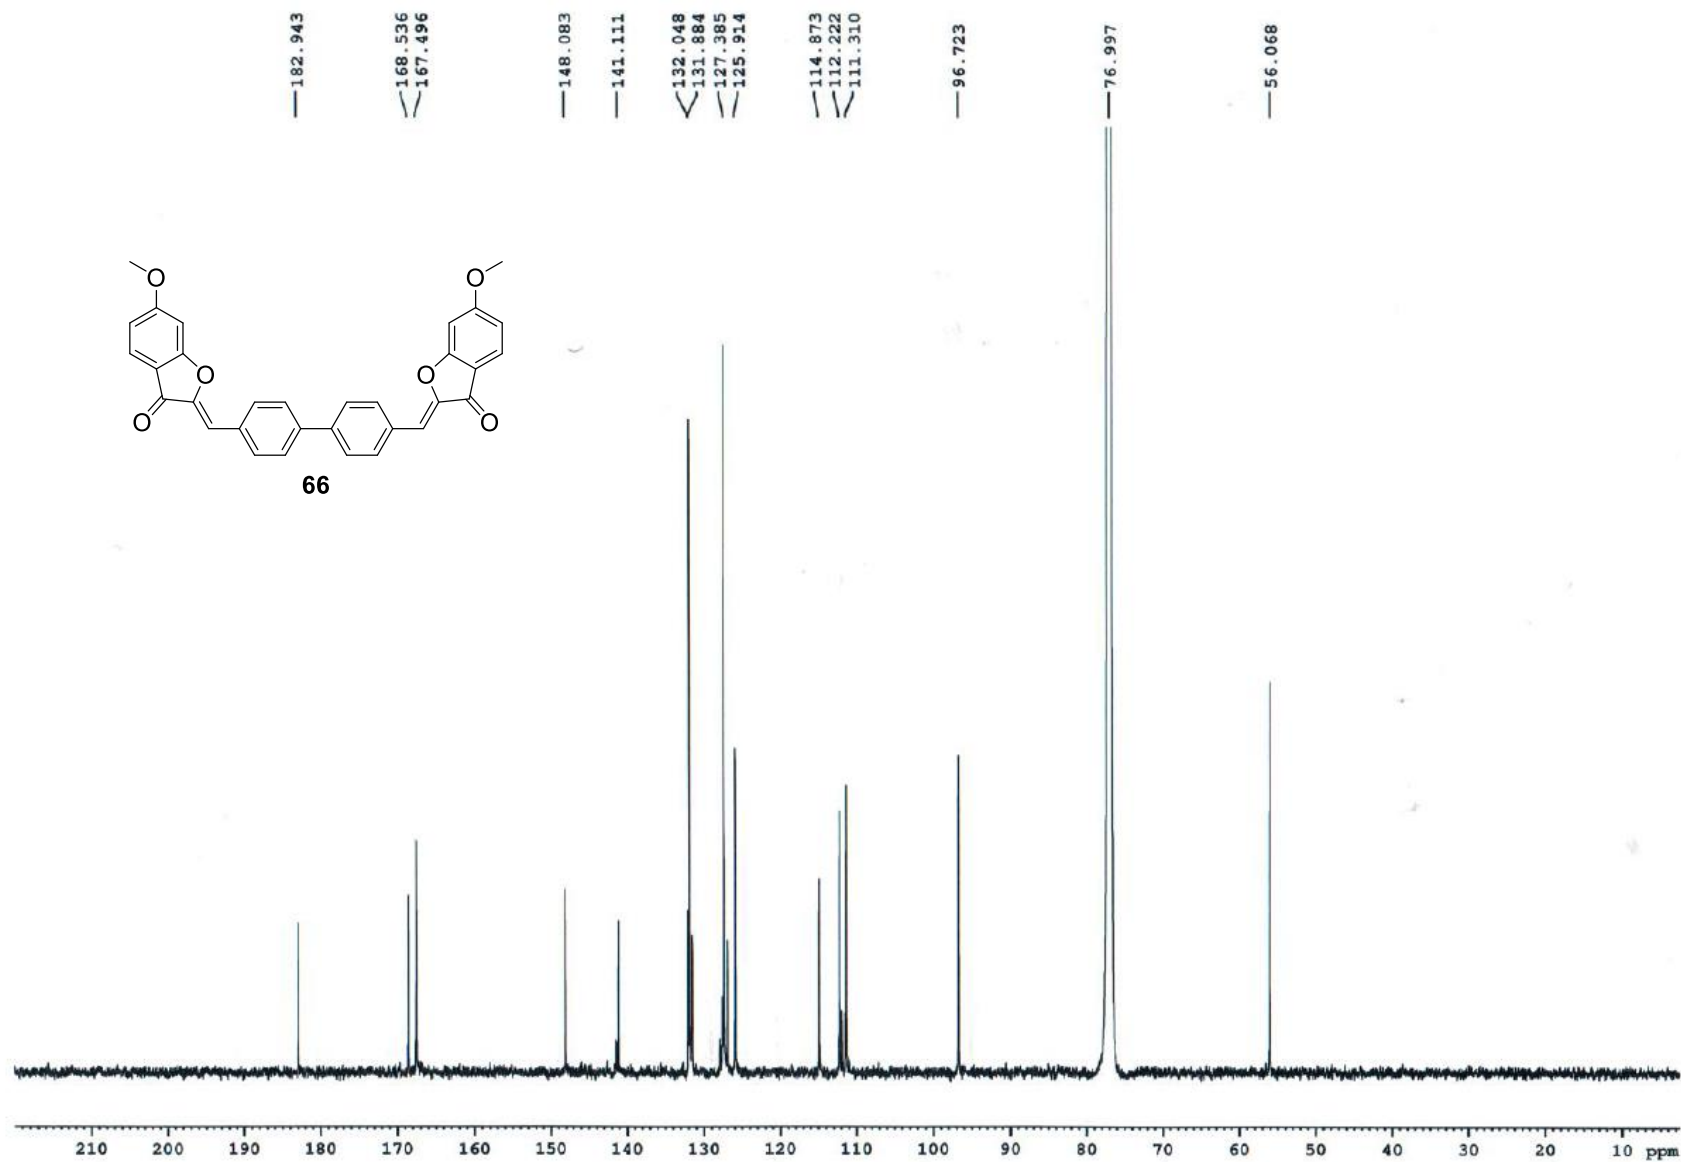

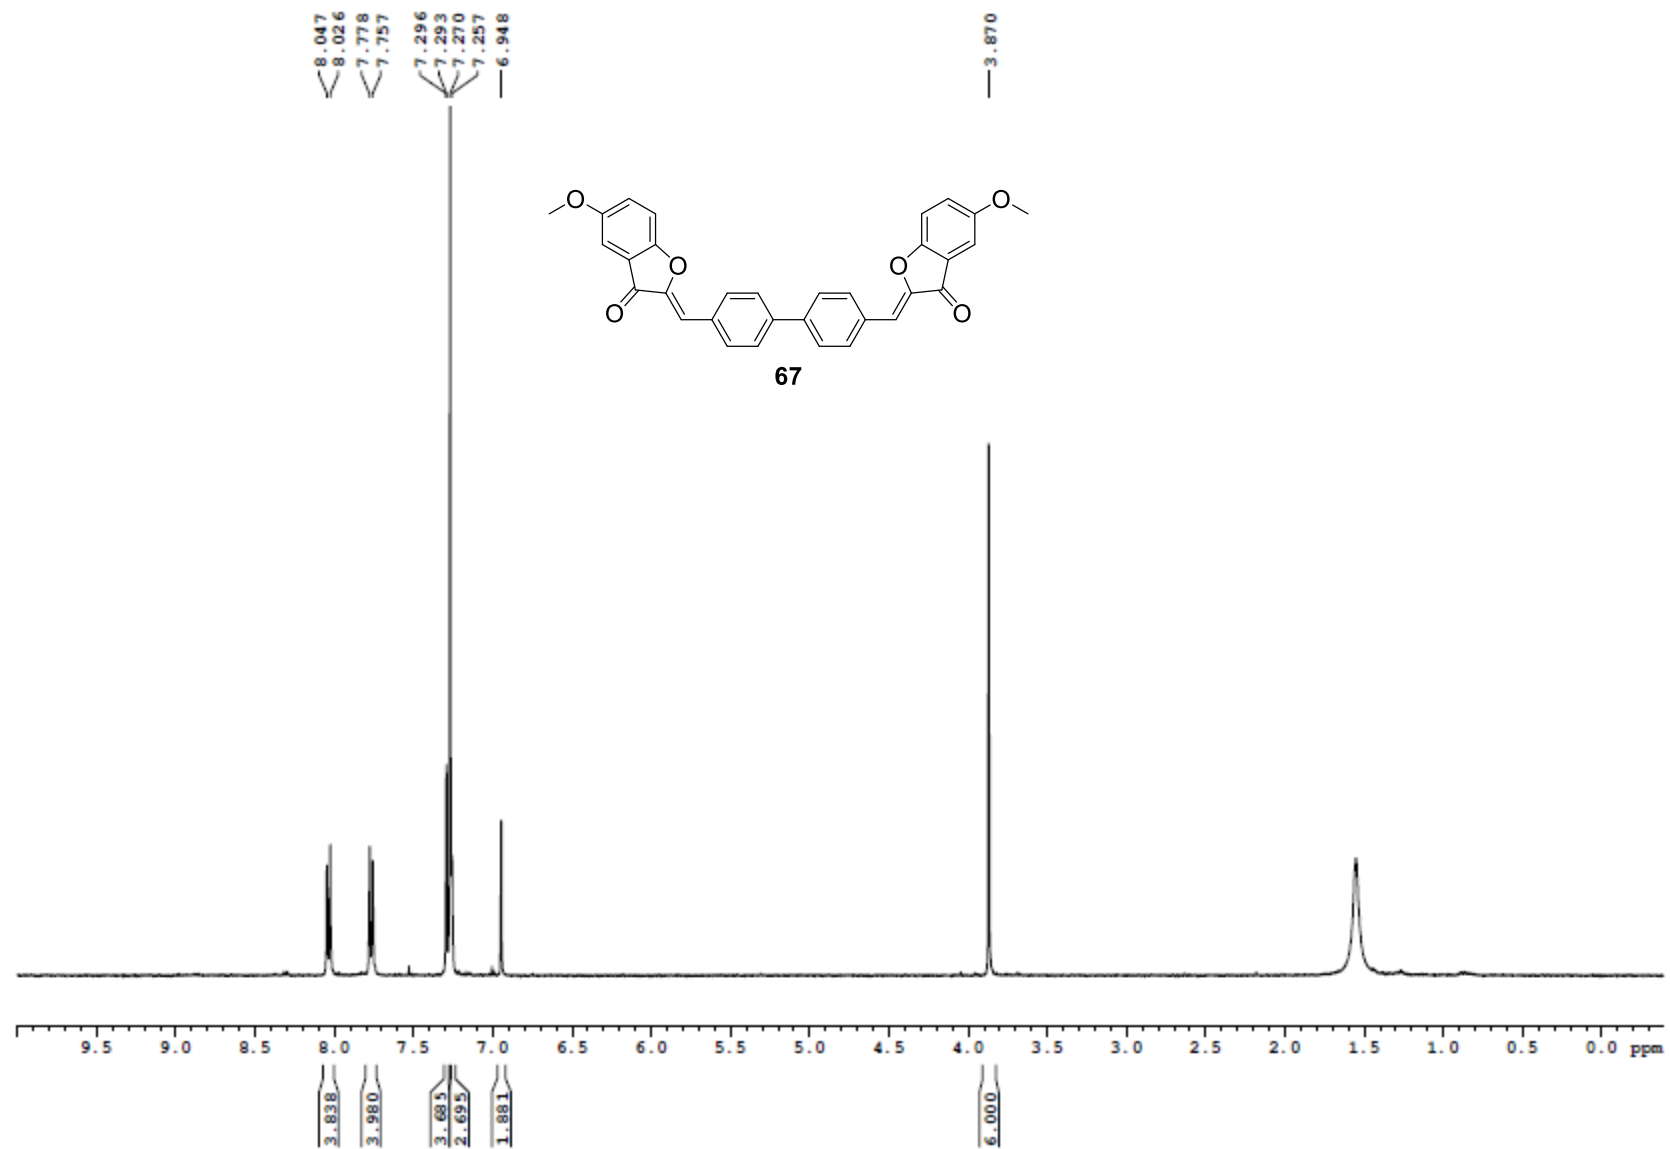

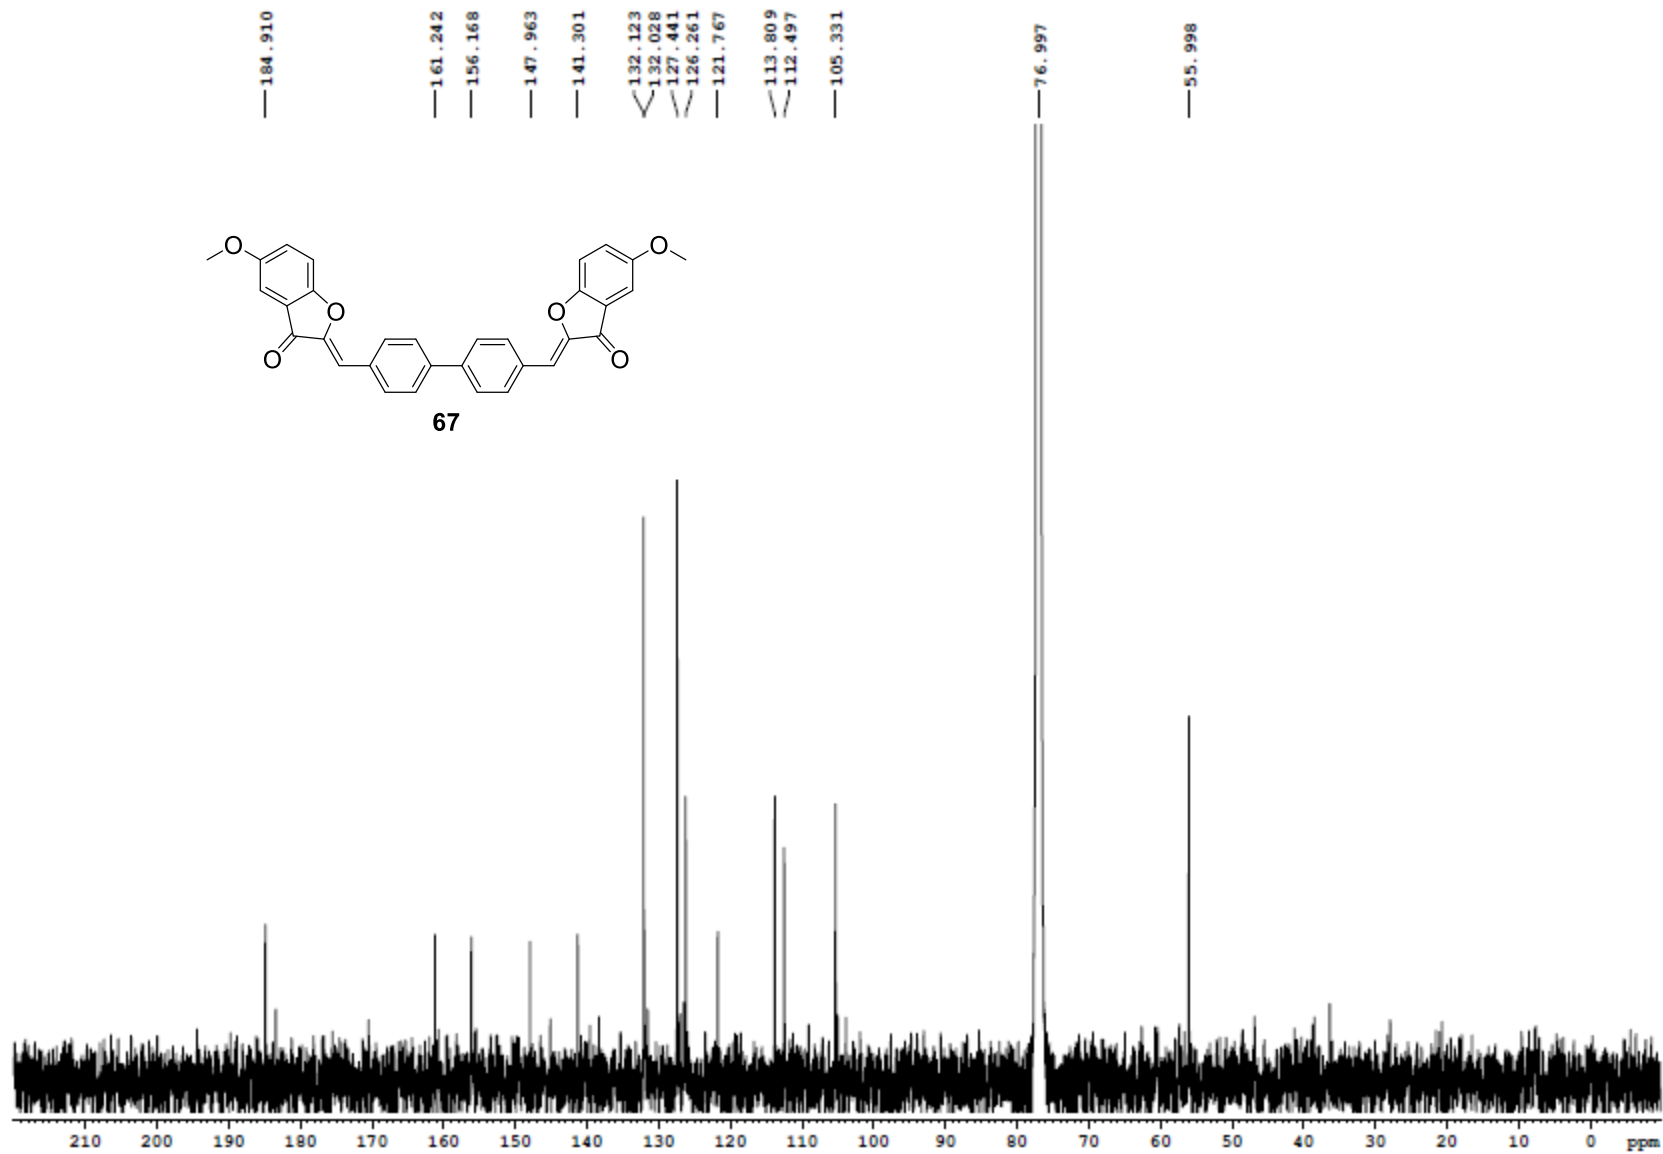

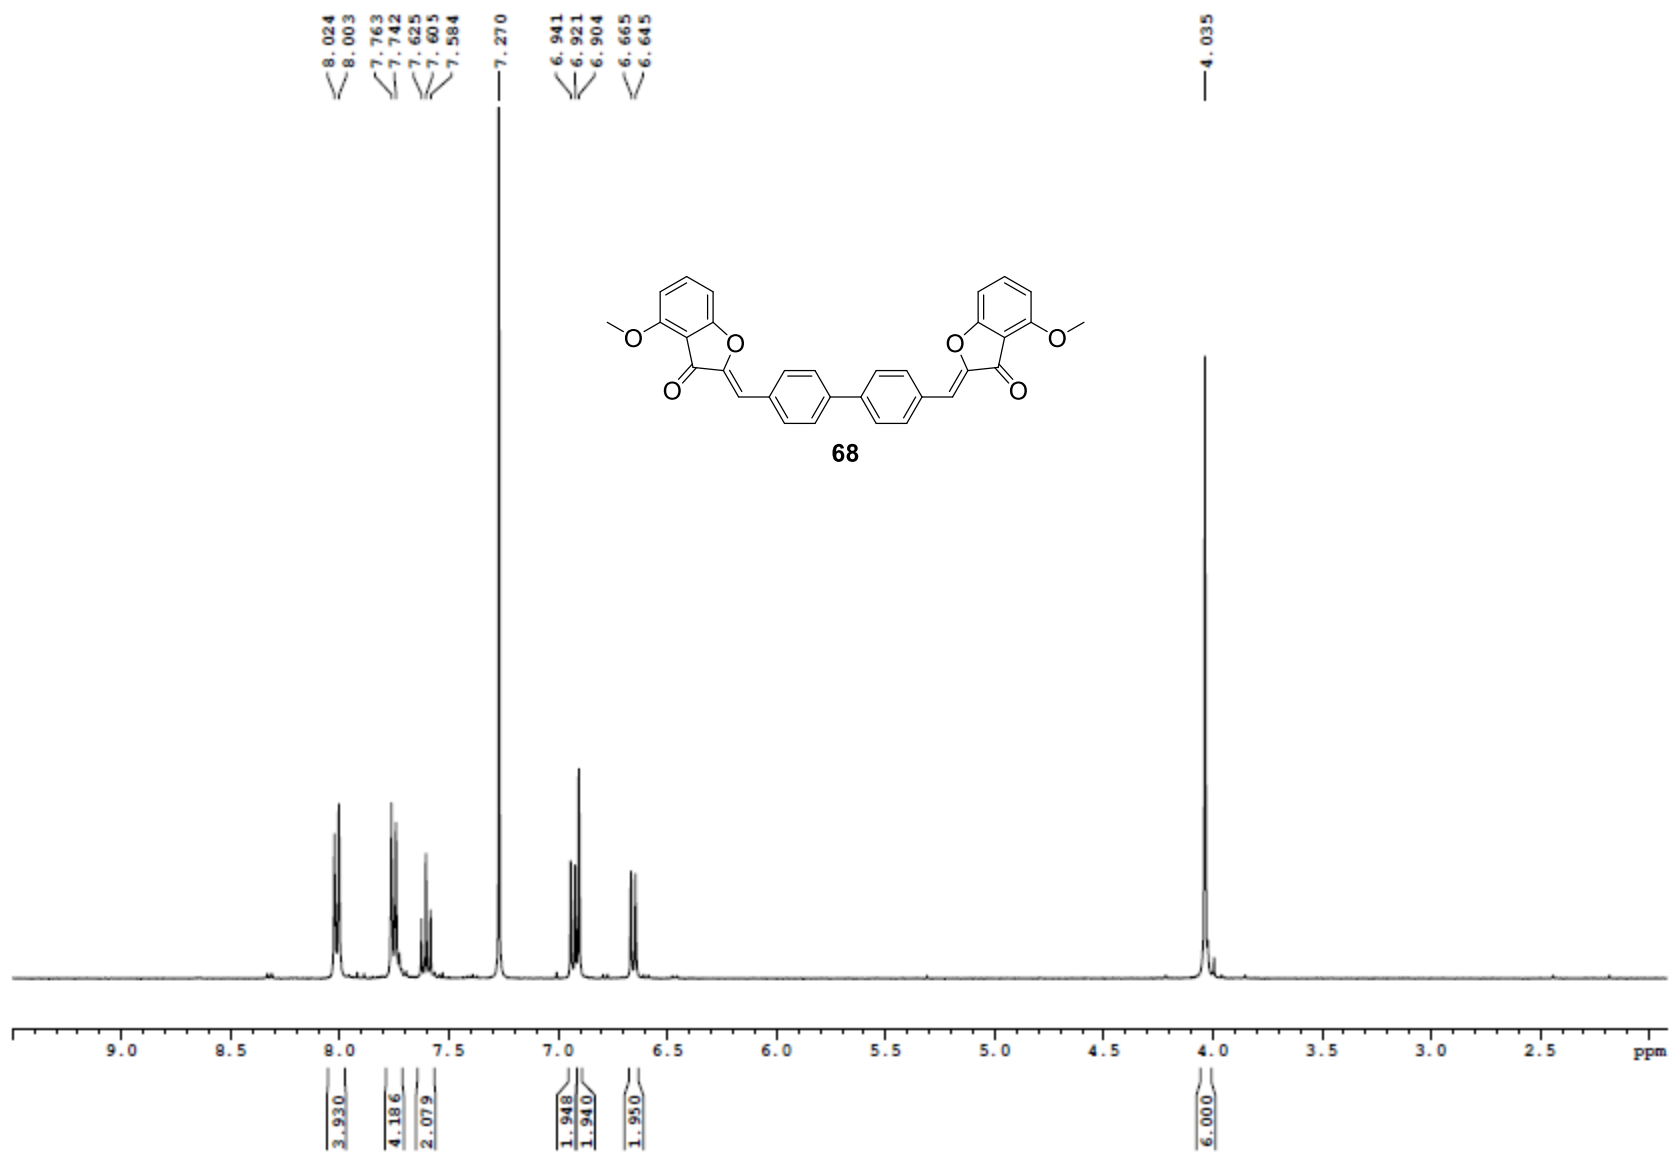

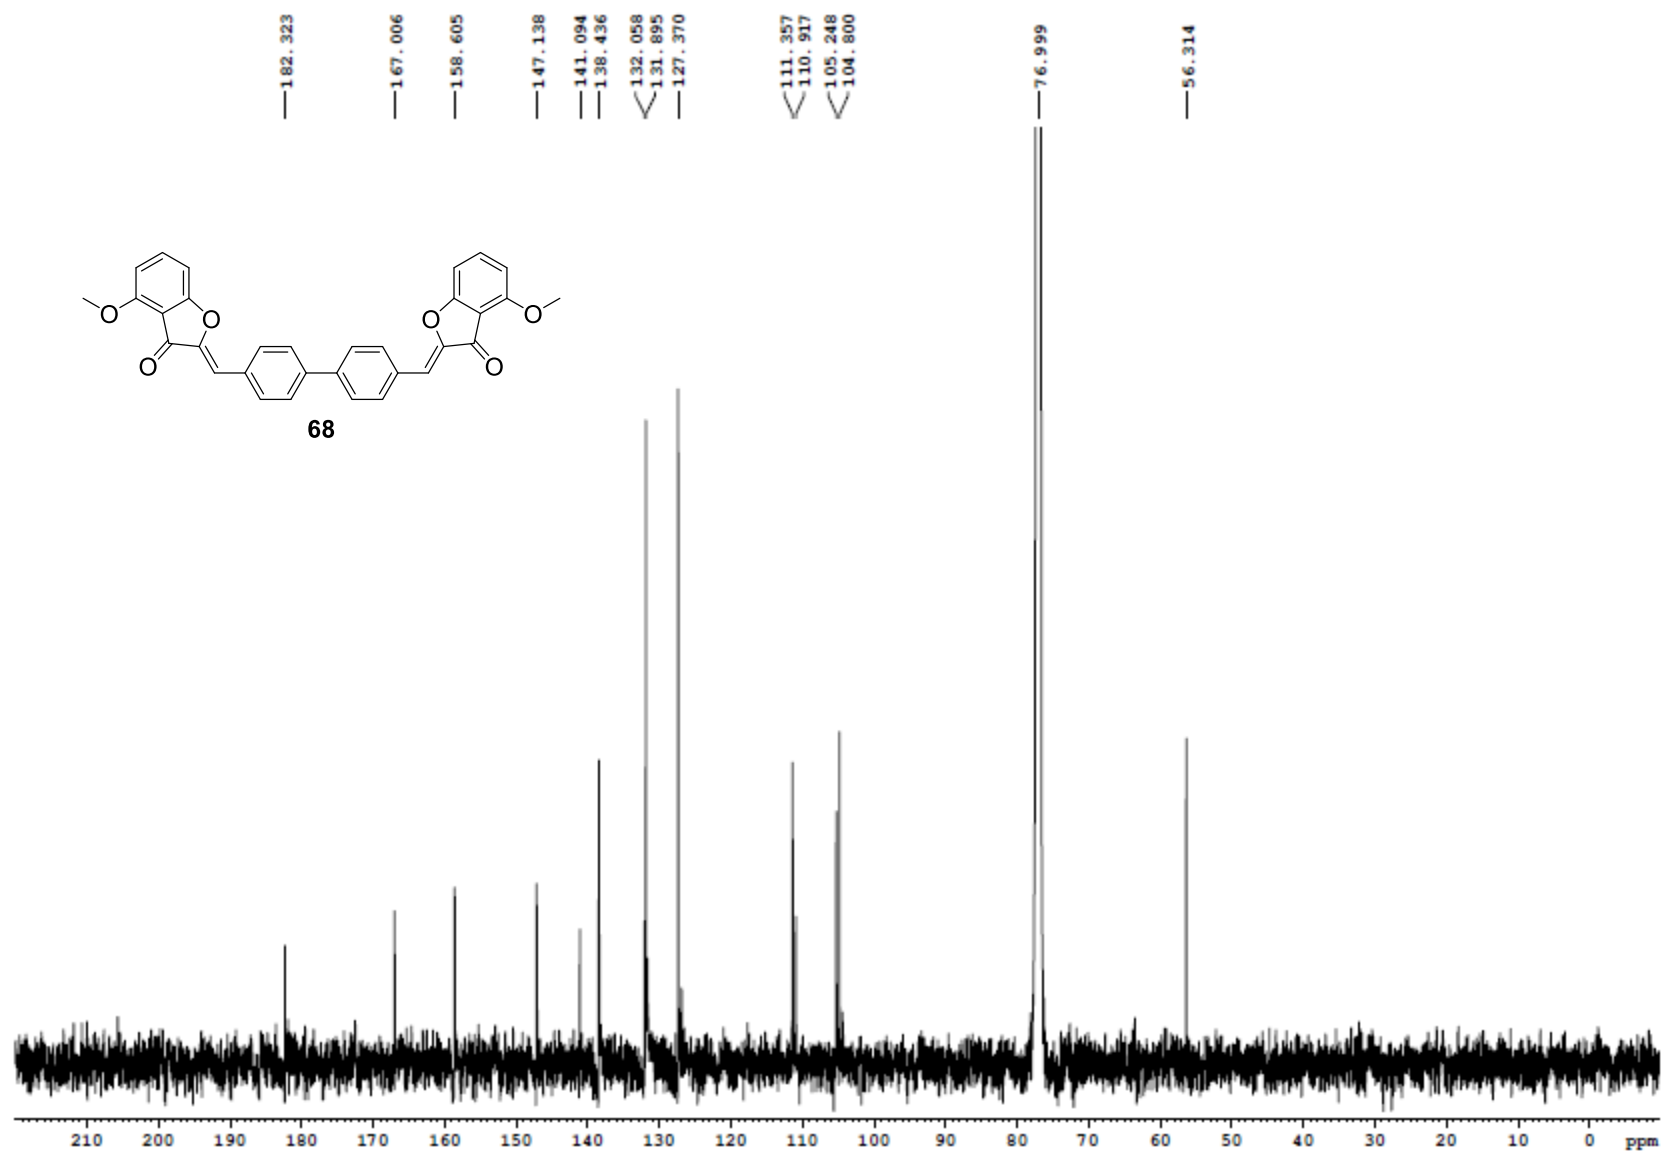

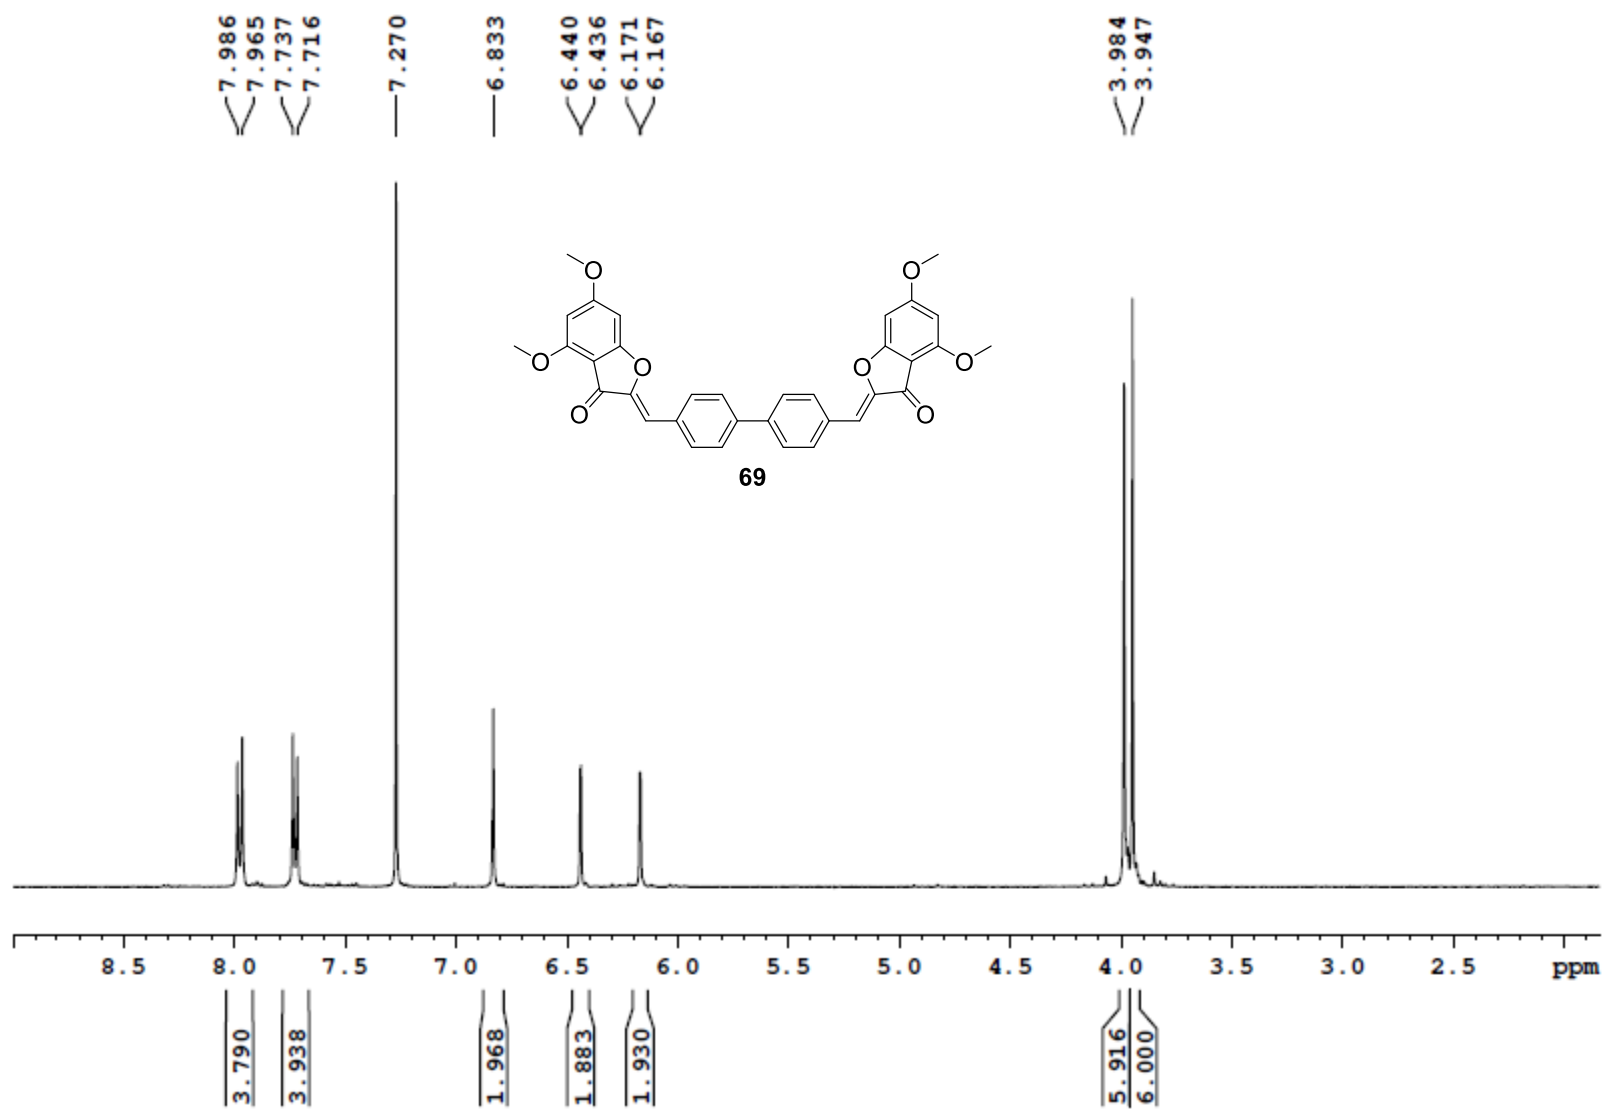

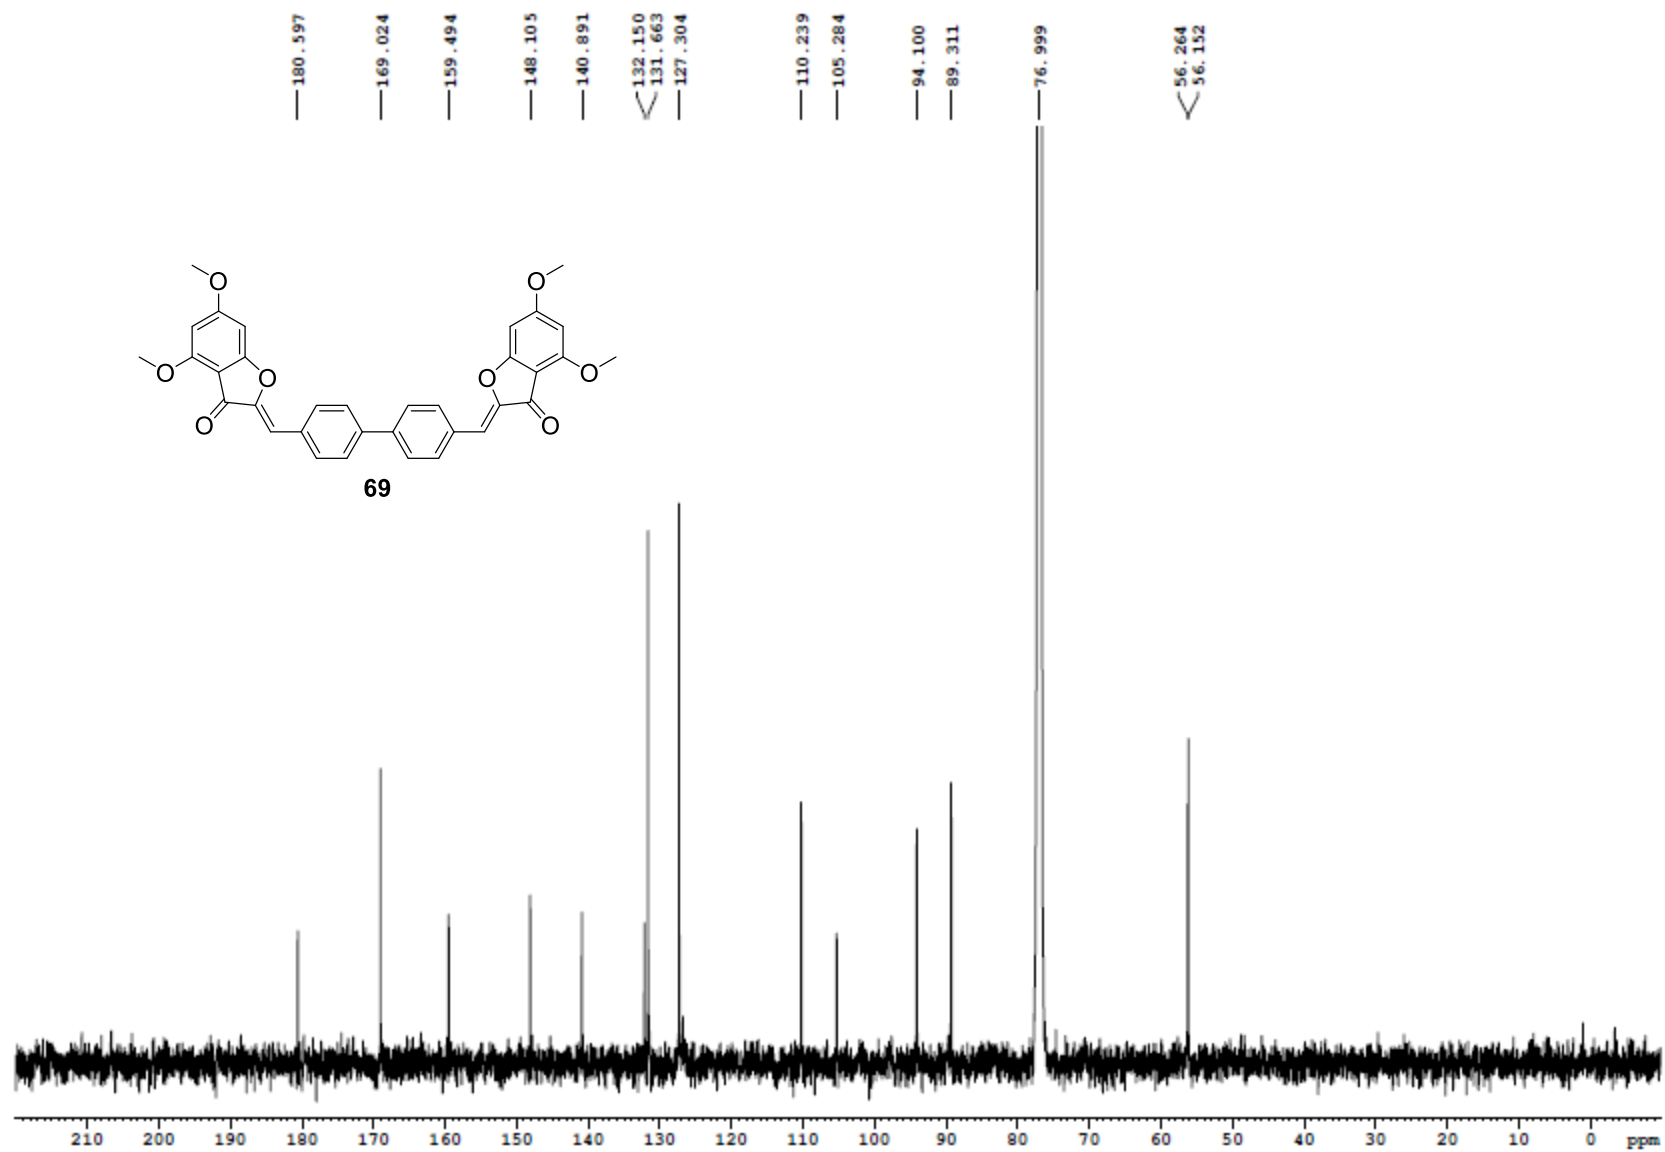

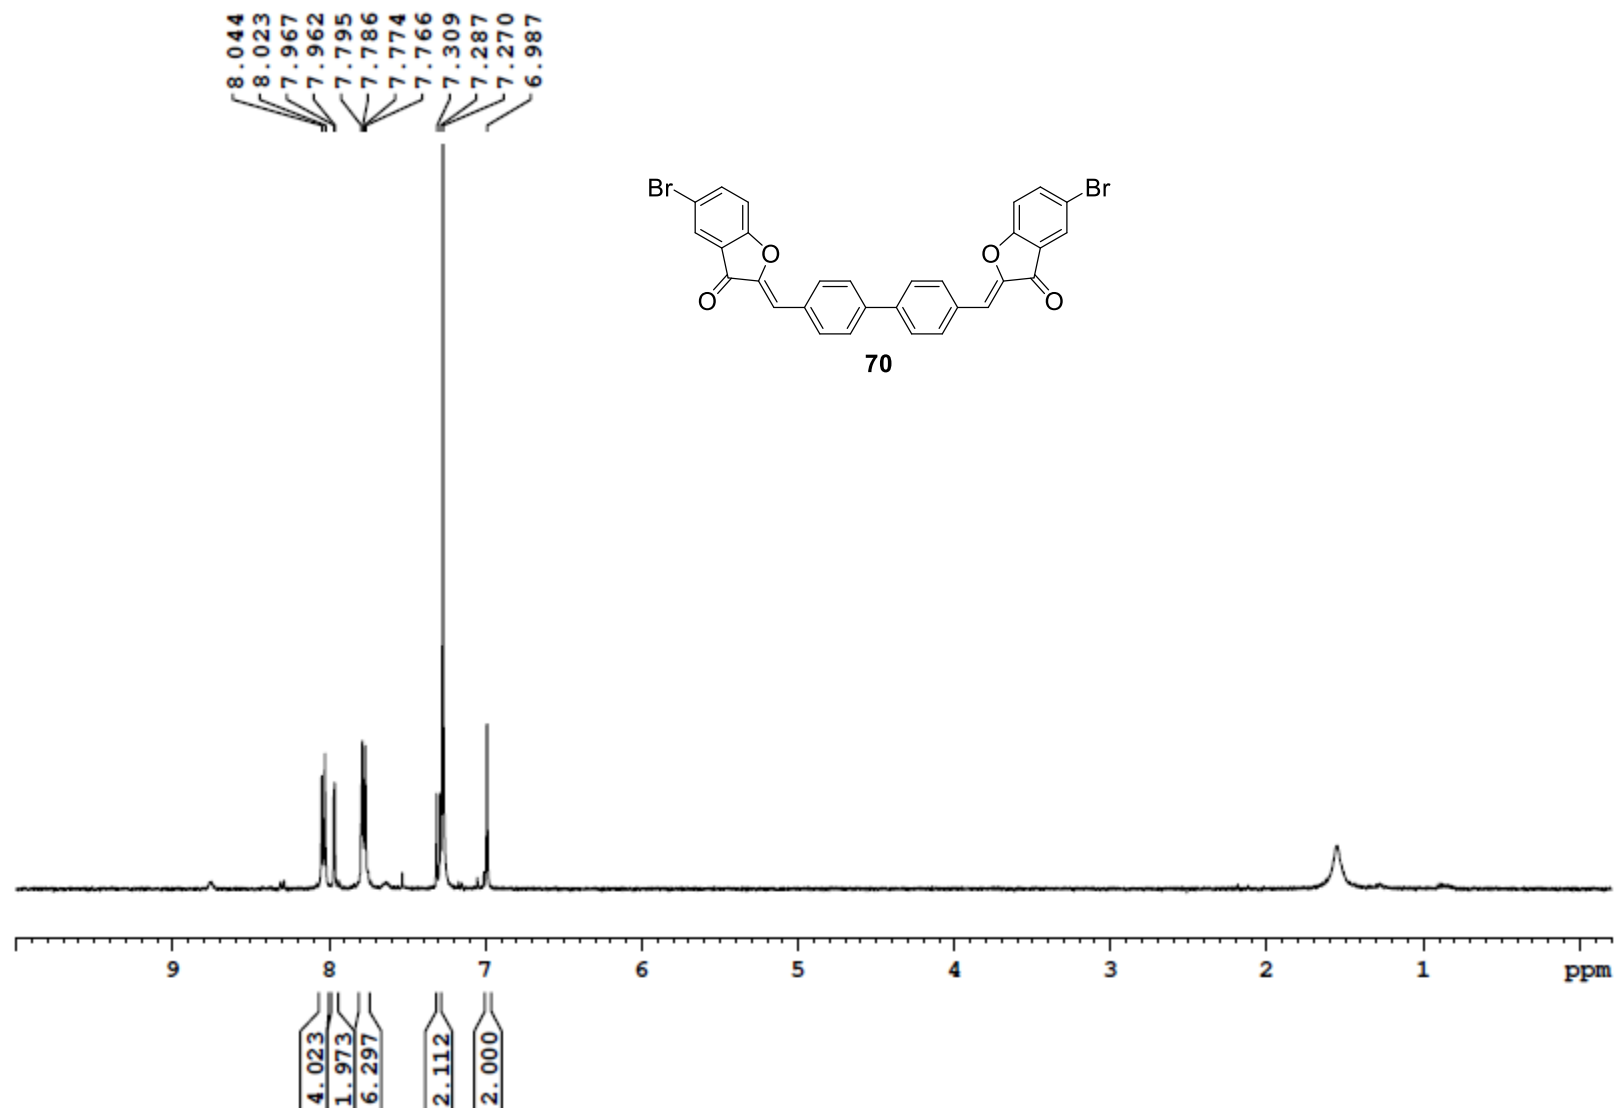



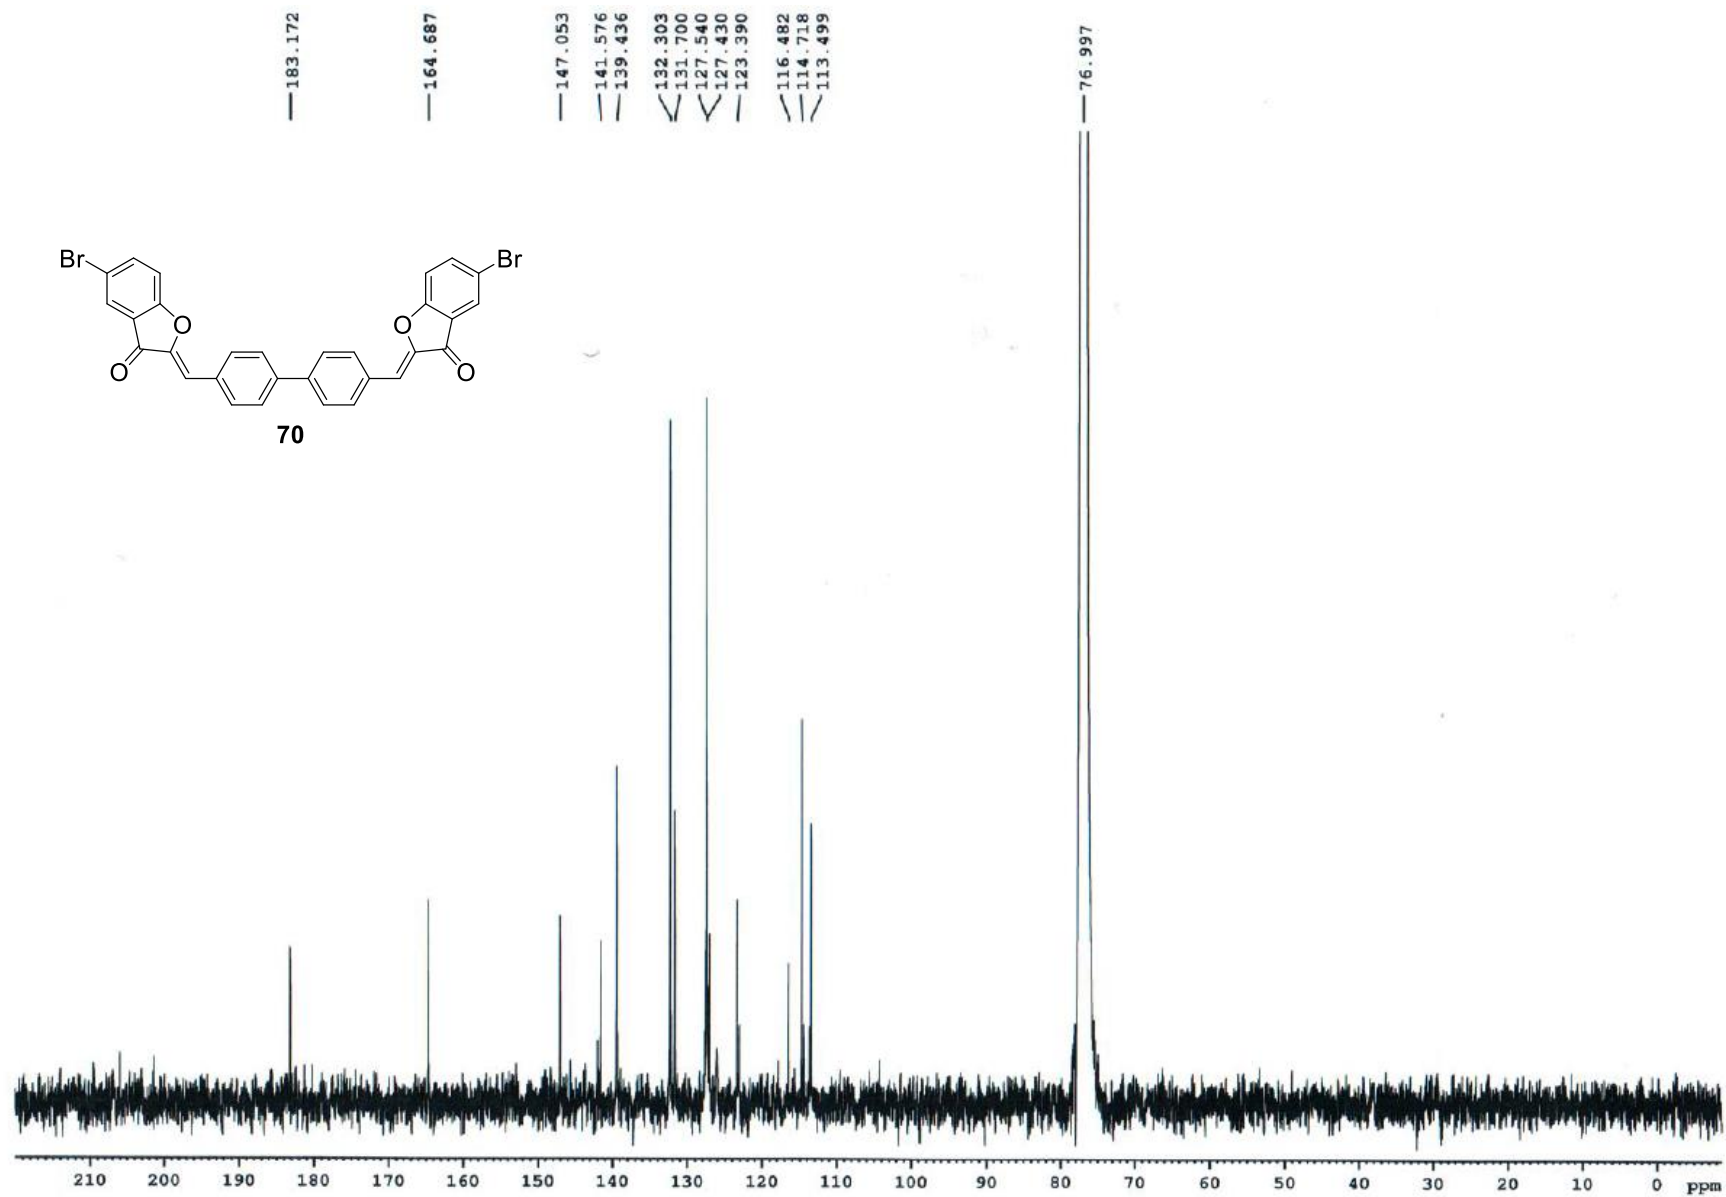

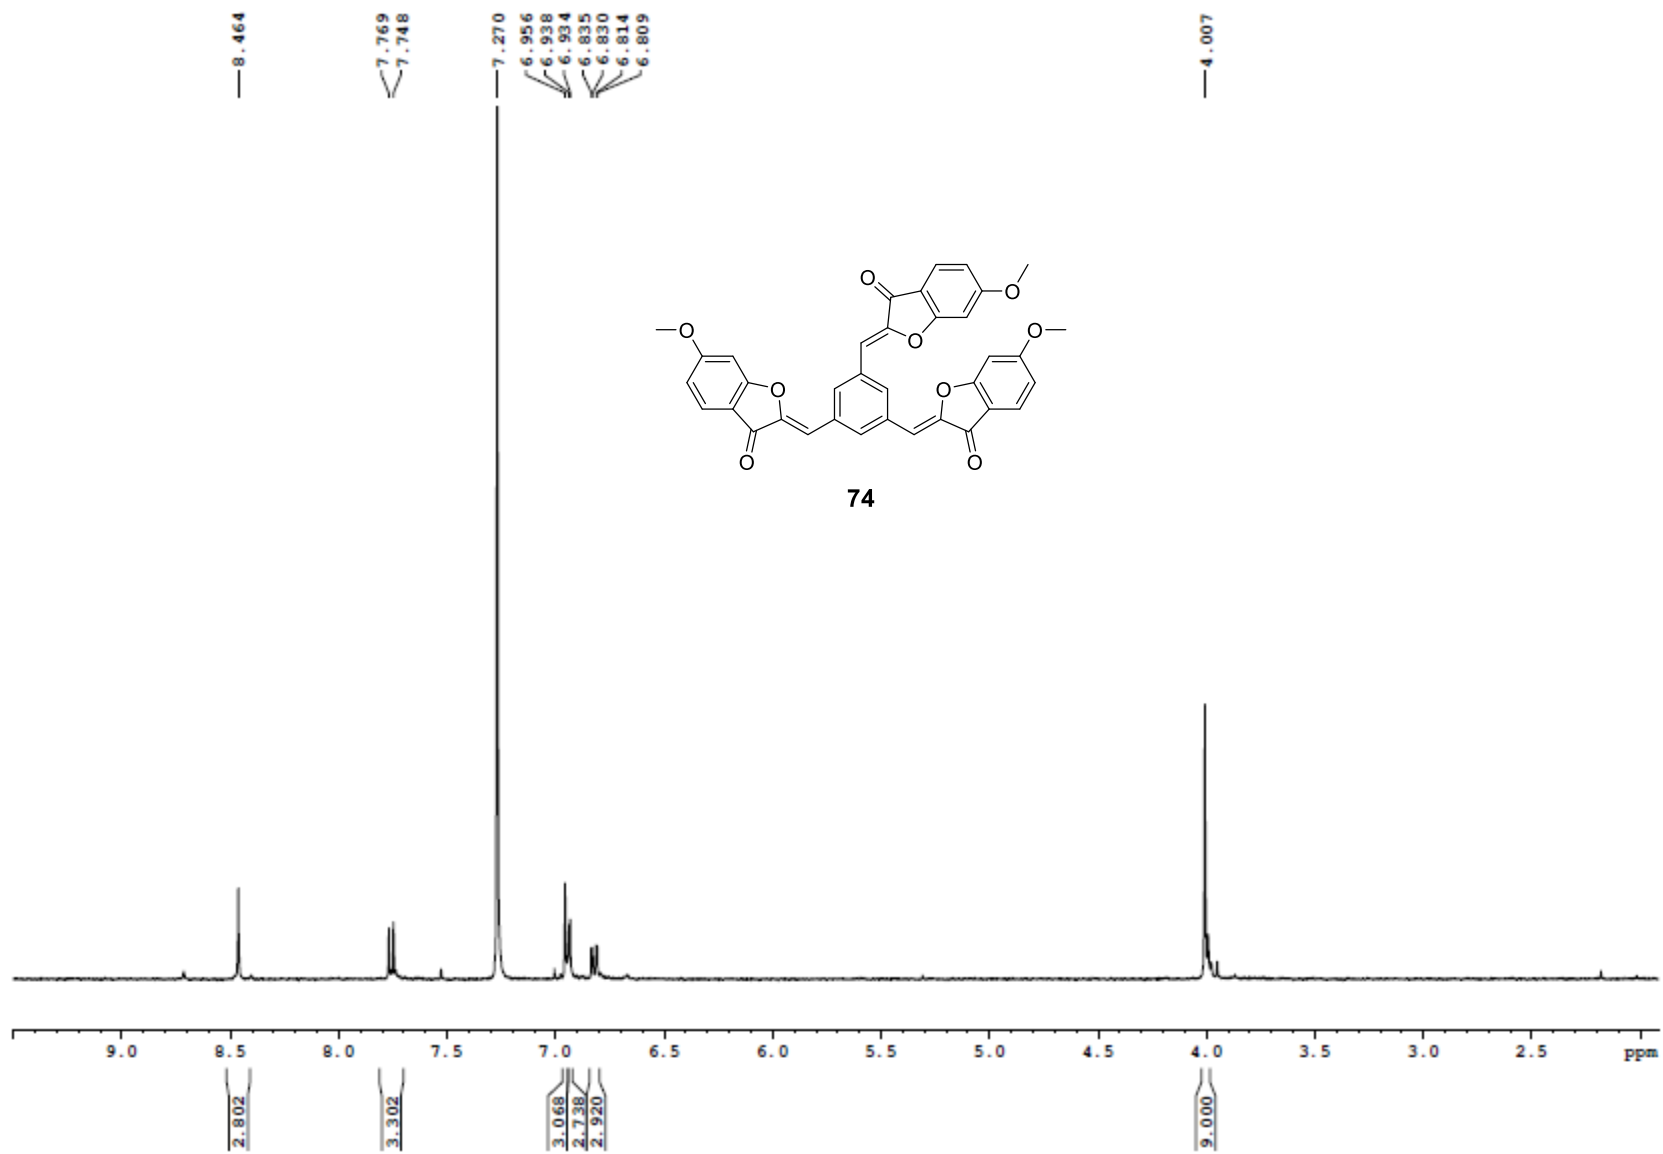

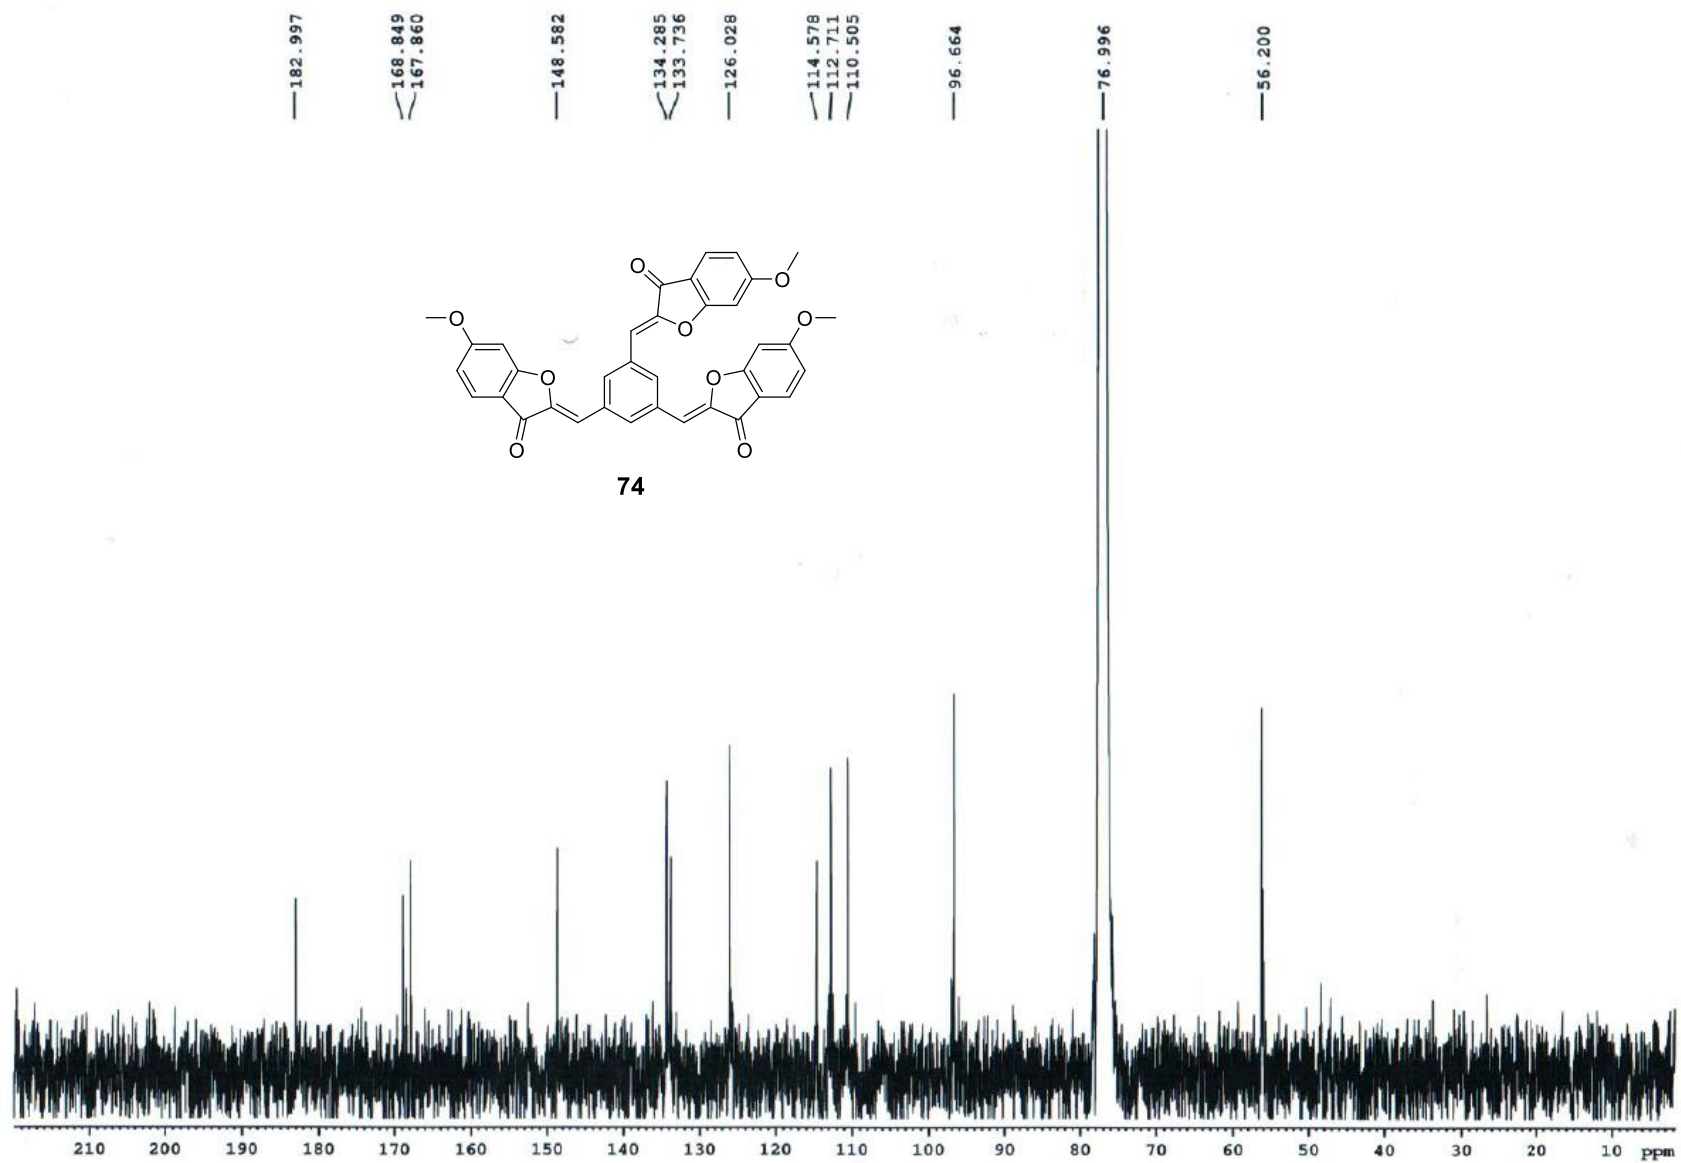

Supplement: c7ob00804j1.pdf [file c7ob00804j1.pdf]
